# Supplementary material
Source: PubMed Central journal article supplement (PMC3898715)
Supplement: ja411626v_si_001.pdf [file ja411626v_si_001.pdf]

## Supporting Information

# Gold(I) Carbenes by Retro-Buchner Reaction: Generation and Fate

Yahui Wang, Paul R. McGonigal, Bart Herlé, Maria Besora, and Antonio M. Echavarren\*

*Institute of Chemical Research of Catalonia (ICIQ), Av. Països Catalans 16, 43007 Tarragona (Spain)*

## Table of Contents

|                                                                                                    |                              |
|----------------------------------------------------------------------------------------------------|------------------------------|
| <b>1. General Methods.</b> .....                                                                   | <b>3</b>                     |
| <b>2. General Procedure for the Synthesis of Arylcycloheptatrienes.</b> .....                      | <b>3</b>                     |
| Experimental Details for the Synthesis of <i>o</i> -Alkenyl Cycloheptatrienes.....                 | 4                            |
| Experimental Details for the Synthesis of <i>o</i> -Aryl Cycloheptatrienes.....                    | 15                           |
| <b>3. General Procedure B for the Gold-Catalyzed Formation of Indenes and<br/>Fluorenes.</b> ..... | <b>22</b>                    |
| Experimental Details on the Synthesis of Indenes. ....                                             | 22                           |
| Experimental Details on the Synthesis of Fluorenes .....                                           | 30                           |
| <b>4. NMR Spectra</b> .....                                                                        | <b>37</b>                    |
| <b>5. DFT Calculation Methods and Data</b> .....                                                   | Error! Bookmark not defined. |

## 1. General Methods.

All reactions were carried out under Argon in solvents dried using a Solvent Purification System (SPS). Thin layer chromatography was carried out using TLC aluminum sheets with 0.2 mm of silica gel (Merck Gf234). Chromatographic purifications were carried out using flash grade silica gel (SDS Chromatogel 60 ACC, 40-60  $\mu\text{m}$ ). NMR spectra were recorded at 23  $^{\circ}\text{C}$  on a Bruker Avance 400 Ultrashield and Bruker Avance 500 Ultrashield apparatus. Mass spectra were recorded on a Waster LCT Premier Spectrometer (ESI and APCI) or on an Autoflex Broker Daltonics (MALDI and LDI). Melting points were determined using a Büchi melting point apparatus.

## 2. General Procedure for the Synthesis of Arylcycloheptatrienes.

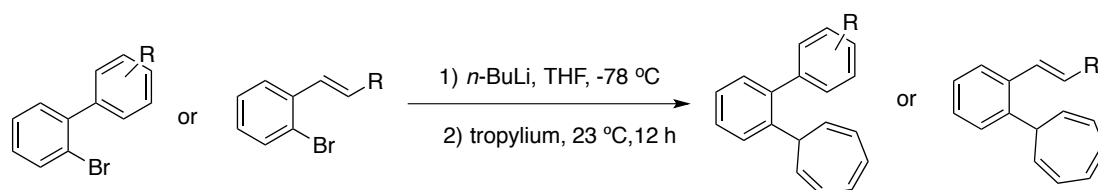

### Procedure A:

*n*-BuLi (1.6 M in hexanes, 0.33 mL, 0.53 mmol) was added dropwise to the solution of corresponding aryl bromide<sup>1</sup> (0.5 mmol) in dry THF (2 mL, 0.2 M) at -78  $^{\circ}\text{C}$  under argon. The mixture was stirred for 30 min at -78  $^{\circ}\text{C}$ , and then tropylium tetrafluoroborate or tropylium bromide<sup>2</sup> (0.33 mmol) was added in one portion. The cooling bath was removed and the reaction was stirred at room temperature (23  $^{\circ}\text{C}$ ) for 12 h. The reaction was quenched by addition of water. The aqueous phase was extracted with ether, the combined organic extracts were dried over  $\text{MgSO}_4$ , and the solvent was evaporated. The crude reaction mixture was purified by column chromatography on silica gel with cyclohexane as eluent unless otherwise stated.

### Procedure A-2:

*n*-BuLi (1.6 M in hexanes, 0.63 mL, 1 mmol) was added dropwise to the solution of corresponding aryl bromide (0.5 mmol) in dry THF (5 mL, 0.1 M) at -78  $^{\circ}\text{C}$  under argon. The mixture was stirred for 30 min at -78  $^{\circ}\text{C}$ , and then tropylium tetrafluoroborate or tropylium bromide (1 mmol) was added in one portion. The cooling bath was removed and the reaction was stirred at room temperature (23  $^{\circ}\text{C}$ ) for 12 h. The reaction was quenched by addition of water. The aqueous phase was extracted with ether, the combined organic extracts were dried over  $\text{MgSO}_4$ , and the solvent was evaporated. The crude reaction mixture was purified by column chromatography on silica gel with cyclohexane as eluent unless otherwise stated.

(1) The aryl bromides were prepared according to the literature procedures: (a) Li, C.-W.; Wang, C.-I.; Liao, H.-Y.; Chaudhuri, R.; Liu, R.-S. *J. Org. Chem.* **2007**, *72*, 9203–9207. (b) Rossi, R.; Carpita, A.; Ribecai, A.; Mannina, L. *Tetrahedron.* **2001**, *57*, 2847–2856. (c) Qi, W.-Y.; Zhu, T.-S.; Xu, M.-H. *Org. Lett.* **2011**, *13*, 3410–3413. (d) de Meijere, A.; Song, Z.-Z.; Lansky, A.; Hyudaa, S.; Raucha, K.; Noltemeyera, M.; König, B.; Knieriem, B. *Eur. J. Org. Chem.* **1998**, 2289–2299.

(2) Tropylium bromide was prepared according to the reported procedure: Doering, W. E.; Knox, L. H. *J. Am. Chem. Soc.* **1957**, *79*, 352–356. Tropylium tetrafluoroborate was purchased from Alfa Aesar.

## Experimental Details for the Synthesis of *o*-Alkenyl Cycloheptatrienes

### (*E*)-7-(2-Styrylphenyl)cyclohepta-1,3,5-triene (7a)

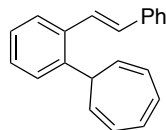

This compound was prepared as a yellow oil in 74% yield according to the general procedure A.

$^1\text{H}$  NMR (400 MHz,  $\text{CDCl}_3$ )  $\delta$  7.69 (dd,  $J = 6.9, 2.2$  Hz, 1H), 7.52 - 7.42 (m, 3H), 7.39 - 7.26 (m, 6H), 6.96 (d,  $J = 16.1$  Hz, 1H), 6.78 (t,  $J = 3.2$  Hz, 2H), 6.35 - 6.29 (m, 2H), 5.48 (dd,  $J = 9.0, 5.4$  Hz, 2H), 3.12 (tt,  $J = 5.6, 1.6$  Hz, 1H).  $^{13}\text{C}$  NMR (101 MHz,  $\text{CDCl}_3$ )  $\delta$  141.0, 137.5, 136.4, 130.9, 130.6, 128.6, 127.9, 127.6, 127.6, 126.9, 126.6, 126.6, 126.5, 124.5, 42.5.

HRMS-APCI calculated for  $\text{C}_{21}\text{H}_{19}$   $[\text{M}+\text{H}]^+$ : 271.1487; found: 271.1497

### (*E*)-7-(2-(4-Chlorostyryl)phenyl)cyclohepta-1,3,5-triene (7b)

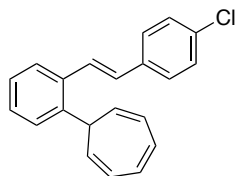

This compound was prepared as a colorless solid in 63% yield according to the general procedure A.

m.p. 65-67 °C

$^1\text{H}$  NMR (500 MHz,  $\text{CDCl}_3$ )  $\delta$  7.66 (dd,  $J = 7.5, 1.7$  Hz, 1H), 7.52 (dd,  $J = 7.5, 1.6$  Hz, 1H), 7.40 - 7.30 (m, 6H), 7.26 (d,  $J = 16.0$  Hz, 1H), 6.91 (d,  $J = 16.0$  Hz, 1H), 6.79 (t,  $J = 3.2$  Hz, 2H), 6.35 - 6.30 (m, 2H), 5.47 (dd,  $J = 9.1, 5.4$  Hz, 2H), 3.09 (t,  $J = 5.4$  Hz, 1H).  $^{13}\text{C}$  NMR (126 MHz,  $\text{CDCl}_3$ )  $\delta$  141.0, 136.0, 136.0, 133.1, 130.9, 129.2, 128.8, 128.1, 127.7, 127.6, 127.2, 126.9, 126.5, 126.4, 124.5, 42.5.

HRMS-APCI calculated for  $\text{C}_{21}\text{H}_{18}\text{Cl}$   $[\text{M}+\text{H}]^+$ : 305.1097; found: 305.1092

### (*E*)-7-(2-(4-Methylstyryl)phenyl)cyclohepta-1,3,5-triene (7c)

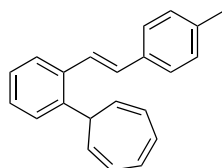

This compound was prepared as a colorless solid in 76% yield according to the general procedure A.

m.p. 70-72 °C

$^1\text{H}$  NMR (500 MHz,  $\text{CDCl}_3$ )  $\delta$  7.68 (dd,  $J = 7.0, 2.3$  Hz, 1H), 7.51 (dd,  $J = 7.2, 2.0$  Hz, 1H), 7.39 - 7.33 (m, 4H), 7.25 (d,  $J = 15.9$  Hz, 1H), 7.17 (d,  $J = 7.9$  Hz, 2H), 6.94 (d,  $J = 16.1$  Hz, 1H), 6.78 (t,  $J = 3.2$  Hz, 2H), 6.33 - 6.29 (m, 2H), 5.49 (dd,  $J = 9.1, 5.4$  Hz, 2H), 3.12 (t,  $J = 5.4$  Hz, 1H), 2.38 (s, 3H).  $^{13}\text{C}$  NMR (126 MHz,  $\text{CDCl}_3$ )  $\delta$  140.9, 137.5, 136.6, 134.8, 130.9, 130.5, 129.3, 127.7, 127.6, 126.8, 126.6, 126.5, 126.4, 125.6, 124.5, 42.5, 21.2.

HRMS-APCI calculated for C<sub>22</sub>H<sub>21</sub> [M+H]<sup>+</sup>: 285.1643; found: 285.1641

**(E)-7-(2-(3-Methylstyryl)phenyl)cyclohepta-1,3,5-triene (7d)**

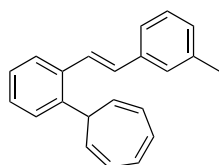

This compound was prepared as a yellow oil in 83% yield according to the general procedure A.

<sup>1</sup>H NMR (400 MHz, CDCl<sub>3</sub>) δ 7.67 (dd, *J* = 7.0, 2.2 Hz, 1H), 7.51 (dd, *J* = 7.3, 1.9 Hz, 1H), 7.39 - 7.32 (m, 2H), 7.31 - 7.24 (m, 4H), 7.09 (d, *J* = 6.9 Hz, 1H), 6.93 (d, *J* = 16.1 Hz, 1H), 6.79 (t, *J* = 3.2 Hz, 2H), 6.36 - 6.29 (m, 2H), 5.49 (dd, *J* = 9.0, 5.4 Hz, 2H), 3.12 (t, *J* = 5.3 Hz, 1H), 2.38 (s, 3H). <sup>13</sup>C NMR (101 MHz, CDCl<sub>3</sub>) δ 141.0, 138.2, 137.5, 136.5, 130.9, 130.8, 128.5, 128.4, 127.8, 127.6, 127.4, 126.9, 126.6, 126.5, 126.4, 124.5, 123.5, 42.5, 21.4.

HRMS-APCI calculated for C<sub>22</sub>H<sub>21</sub> [M+H]<sup>+</sup>: 285.1643; found: 285.1634

**(E)-7-(2-(2,4,6-Trimethylstyryl)phenyl)cyclohepta-1,3,5-triene (7e)**

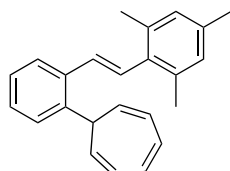

This compound was prepared as a white solid in 60% yield according to the general procedure A.

m.p. 89-91 °C

<sup>1</sup>H NMR (400 MHz, CDCl<sub>3</sub>) δ 7.70 (dd, *J* = 7.1, 2.2 Hz, 1H), 7.53 (dd, *J* = 7.2, 2.0 Hz, 1H), 7.40 - 7.36 (m, 2H), 6.98 - 6.88 (m, 3H), 6.80 - 6.70 (m, 3H), 6.27 - 6.25 (m, 2H), 5.46 (dd, *J* = 9.0, 5.4 Hz, 2H), 3.07 (dd, *J* = 6.2, 4.6 Hz, 1H), 2.30 (s, 9H). <sup>13</sup>C NMR (101 MHz, CDCl<sub>3</sub>) δ 140.9, 137.1, 136.3, 136.1, 134.2, 131.6, 130.9, 129.1, 128.6, 127.8, 127.3, 126.8, 126.6, 126.5, 124.5, 42.2, 21.1, 20.9.

HRMS-APCI calculated for C<sub>24</sub>H<sub>25</sub> [M+H]<sup>+</sup>: 313.1956; found: 313.1960

**(E)-7-(2-(3-Phenylprop-1-en-1-yl)phenyl)cyclohepta-1,3,5-triene (7f)**

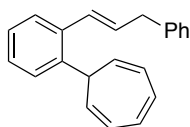

This compound was prepared as a yellow oil in 49% yield according to the general procedure A.

<sup>1</sup>H NMR (500 MHz, CDCl<sub>3</sub>) δ 7.50 (dd, *J* = 7.7, 1.5 Hz, 1H), 7.47 (dd, *J* = 7.7, 1.4 Hz, 1H), 7.33 - 7.30 (m, 3H), 7.28 - 7.19 (m, 4H), 6.76 (t, *J* = 3.2 Hz, 2H), 6.59 (d, *J* = 15.5 Hz, 1H), 6.29 - 6.27 (m, 2H), 6.19 (dt, *J* = 15.5, 6.9 Hz, 1H), 5.43 (dd, *J* = 9.1, 5.4 Hz, 2H), 3.52 (dd, *J* = 7.0, 1.5 Hz, 2H), 3.04 (t, *J* = 5.3 Hz, 1H). <sup>13</sup>C NMR (126 MHz, CDCl<sub>3</sub>) δ 140.4, 140.1, 136.8, 131.4, 130.8, 129.0, 128.6, 128.4, 127.4, 127.3, 126.8, 126.7, 126.6, 126.0, 124.4, 42.2, 39.5.

HRMS-APCI calculated for C<sub>22</sub>H<sub>21</sub> [M+H]<sup>+</sup>: 285.1643; found: 285.1649

**7-(2-((1*E*,3*E*)-4-Phenylbuta-1,3-dien-1-yl)phenyl)cyclohepta-1,3,5-triene (7g)**

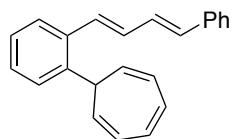

This compound was prepared as a colorless solid in 82% yield according to the general procedure A from 1-bromo-2-((1*E*,3*E*)-4-phenylbuta-1,3-dien-1-yl)benzene (see **7u** synthesis).

m.p. 124-125 °C

<sup>1</sup>H NMR (500 MHz, CDCl<sub>3</sub>) δ 7.68 - 7.64 (m, 1H), 7.49 - 7.44 (m, 3H), 7.37 - 7.30 (m, 4H), 7.25 (t, *J* = 7.3 Hz, 1H), 6.94 (ddd, *J* = 15.5, 5.9, 4.1 Hz, 1H), 6.90 - 6.84 (m, 2H), 6.79 (dd, *J* = 3.7, 2.7 Hz, 2H), 6.68 (d, *J* = 15.3 Hz, 1H), 6.36 - 6.29 (m, 2H), 5.45 (dd, *J* = 9.0, 5.3 Hz, 2H), 3.10 (t, *J* = 5.6 Hz, 1H). <sup>13</sup>C NMR (126 MHz, CDCl<sub>3</sub>) δ 140.8, 137.3, 136.1, 132.8, 131.0, 130.9, 130.3, 129.5, 128.6, 127.9, 127.5, 126.8, 126.8, 126.4, 126.2, 124.5, 42.4.

HRMS-APCI calculated for C<sub>23</sub>H<sub>21</sub> [M+H]<sup>+</sup>: 297.1643; found: 297.1650

**(*E*)-7-(2-(Oct-1-en-1-yl)phenyl)cyclohepta-1,3,5-triene (7h)**

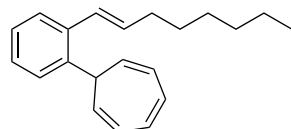

This compound was prepared as a yellow oil in 69% yield according to the general procedure A.

<sup>1</sup>H NMR (400 MHz, CDCl<sub>3</sub>) δ 7.48 (dd, *J* = 7.2, 1.9 Hz, 1H), 7.45 (dd, *J* = 7.3, 1.8 Hz, 1H), 7.32 - 7.24 (m, 2H), 6.76 (t, *J* = 3.2 Hz, 2H), 6.50 (d, *J* = 15.5 Hz, 1H), 6.32 - 6.26 (m, 2H), 6.03 (dt, *J* = 15.5, 6.9 Hz, 1H), 5.43 (dd, *J* = 9.1, 5.5 Hz, 2H), 3.05 (t, *J* = 5.2 Hz, 1H), 2.17 (qd, *J* = 7.1, 1.5 Hz, 2H), 1.45 - 1.25 (m, 8H), 0.90 (t, *J* = 7.0 Hz, 3H). <sup>13</sup>C NMR (101 MHz, CDCl<sub>3</sub>) δ 140.2, 137.2, 133.5, 130.8, 127.5, 127.4, 127.1, 126.9, 126.7, 126.6, 124.3, 42.3, 33.2, 31.7, 29.2, 28.8, 22.6, 14.1.

HRMS-APCI calculated for C<sub>21</sub>H<sub>27</sub> [M+H]<sup>+</sup>: 279.2113; found: 279.2108

**(*E*)-7-(2-(6-Methylhepta-1,5-dien-1-yl)phenyl)cyclohepta-1,3,5-triene (7i)**

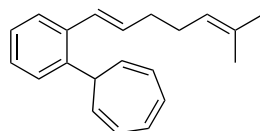

This compound was prepared as a colorless oil in 78% yield according to the general procedure A.

<sup>1</sup>H NMR (400 MHz, CDCl<sub>3</sub>) δ 7.52 - 7.44 (m, 2H), 7.34 - 7.22 (m, 2H), 6.76 (t, *J* = 3.2 Hz, 2H), 6.52 (d, *J* = 15.6 Hz, 1H), 6.30 - 6.26 (m, 2H), 6.05 (dt, *J* = 15.6, 6.7 Hz, 1H), 5.43 (dd, *J* = 9.1, 5.5 Hz, 2H), 5.17 - 5.13 (m, 1H), 3.04 (t, *J* = 5.6 Hz, 1H), 2.24 - 2.17 (m, 2H), 2.13 (q, *J* = 6.9 Hz, 2H), 1.71 (s, 3H), 1.62 (s, 3H). <sup>13</sup>C NMR (101 MHz, CDCl<sub>3</sub>) δ 140.2, 137.1, 132.9, 131.9, 130.8, 127.8, 127.4, 127.2, 126.9, 126.7, 126.6, 124.3, 123.7, 42.3, 33.4, 27.8, 25.7, 17.7.

HRMS-APCI calculated for C<sub>21</sub>H<sub>25</sub> [M+H]<sup>+</sup>: 277.1956; found: 277.1969

**(E)-7-(2-(4,8-Dimethylnona-1,7-dien-1-yl)phenyl)cyclohepta-1,3,5-triene (7j)**

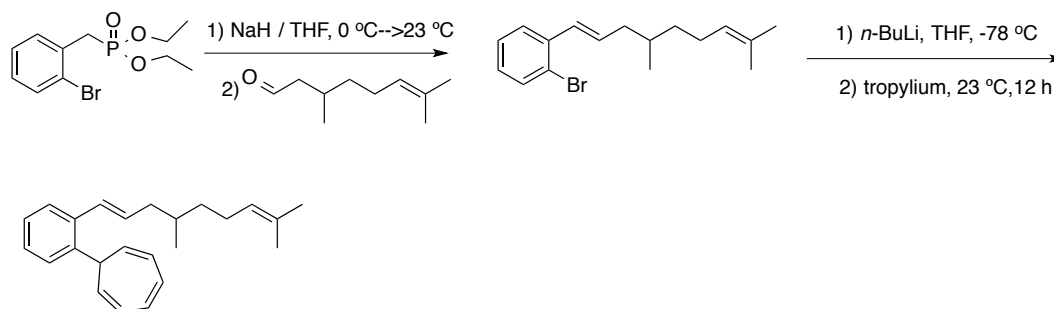

To a suspension of NaH (60% in oil, 290 mg, 7.3 mmol) in THF (20 mL) at 0 °C was slowly added diethyl 2-bromobenzylphosphonate<sup>3</sup> (2 g, 6.6 mmol). The resulting suspension was stirred for 1 h at room temperature (23 °C). The reaction mixture was cooled to 0 °C, and then (±)-citronellal (1.02 g, 6.6 mmol) was added dropwise and slowly warmed to room temperature. After stirring overnight (12 h), the reaction was quenched with ice water and the aqueous phase was extracted with Et<sub>2</sub>O. The combined organic layers were washed with brine and dried over MgSO<sub>4</sub>. After concentration in vacuo, the residue was purified by silica gel flash column chromatography to give 1.65g (E)-1-bromo-2-(4,8-dimethylnona-1,7-dien-1-yl)benzene as colorless oil in 81% yield.

<sup>1</sup>H NMR (400 MHz, CDCl<sub>3</sub>) δ 7.55 (dd, *J* = 8.0, 1.3 Hz, 1H), 7.51 (dd, *J* = 7.8, 1.7 Hz, 1H), 7.30 - 7.22 (m, 1H), 7.08 (ddd, *J* = 8.0, 7.3, 1.7 Hz, 1H), 6.72 (d, *J* = 15.7 Hz, 1H), 6.17 (dt, *J* = 15.7, 7.3 Hz, 1H), 5.19 - 5.05 (m, 1H), 2.35 - 2.27 (m, 1H), 2.19 - 1.98 (m, 3H), 1.77 - 1.61 (m, 7H), 1.50 - 1.42 (m, 1H), 1.28 - 1.20 (m, 1H), 0.98 (d, *J* = 6.7 Hz, 3H). <sup>13</sup>C NMR (75 MHz, CDCl<sub>3</sub>) δ 137.76, 132.84, 132.80, 131.26, 129.84, 128.10, 127.35, 126.88, 124.74, 123.12, 40.48, 36.72, 32.80, 25.74, 25.61, 19.54, 17.69.

HRMS-APCI calculated for C<sub>17</sub>H<sub>24</sub>Br [M+H]<sup>+</sup>: 307.1056; found: 307.1050

The title compound was prepared according to general procedure A from (E)-1-bromo-2-(4,8-dimethylnona-1,7-dien-1-yl)benzene as colorless oil in 71% yield.

<sup>1</sup>H NMR (400 MHz, CDCl<sub>3</sub>) δ 7.49 - 7.45 (m, 2H), 7.31 - 7.25 (m, 2H), 6.75 (dd, *J* = 3.7, 2.7 Hz, 2H), 6.50 (d, *J* = 15.6 Hz, 1H), 6.30 - 6.24 (m, 2H), 6.01 (dt, *J* = 15.5, 7.3 Hz, 1H), 5.45 - 5.39 (m, 2H), 5.12 (ddt, *J* = 8.6, 5.7, 1.4 Hz, 1H), 3.13 - 3.00 (m, 1H), 2.24 - 2.16 (m, 1H), 2.07 - 1.95 (m, 3H), 1.71 (s, 3H), 1.64 - 1.56 (m, 4H), 1.43 - 1.34 (m, 1H), 1.20 - 1.15 (m, 1H), 0.91 (d, *J* = 6.7 Hz, 3H). <sup>13</sup>C NMR (75 MHz, CDCl<sub>3</sub>) δ 140.25, 137.30, 132.05, 131.12, 130.83, 128.92, 127.44, 127.21, 126.95, 126.92, 126.68, 124.83, 124.35, 42.36, 40.65, 36.65, 32.83, 25.73, 25.62, 19.52, 17.67.

HRMS-APCI calculated for C<sub>24</sub>H<sub>31</sub> [M+H]<sup>+</sup>: 319.2420; found: 319.2429

**7-(2-((E)-2-((1R\*,2S\*,3R\*)-2,3-diphenylcyclopropyl)vinyl)phenyl)cyclohepta-1,3,5-triene (7k)**

(3) Alexander, J. B.; Mervyn, H.; John, T. S. *J. Chem. Soc., Perkin Trans. 1* **1994**, 3149-3161.

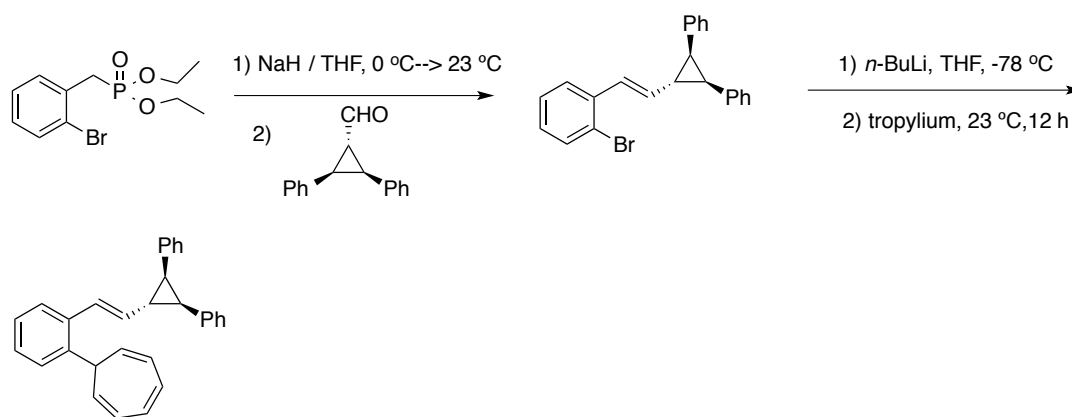

To a suspension of NaH (60% in oil, 99 mg, 2.47 mmol) in THF (4 mL) at 0 °C was slowly added diethyl 2-bromobenzylphosphonate (759 mg, 2.47 mmol). The resulting suspension was stirred for 1 h at room temperature (23 °C). The reaction mixture was cooled to 0 °C, and then *trans*-2,*trans*-3-diphenylcyclopropanecarboxaldehyde<sup>4</sup> (506 mg, 2.25 mmol) in 1 mL THF was added dropwise and slowly warmed to room temperature. After stirring overnight (12 h), the reaction was quenched with ice water and the aqueous phase was extracted with Et<sub>2</sub>O. The combined organic layers were washed with brine and dried over MgSO<sub>4</sub>. After concentration in vacuo, the residue was purified by silica gel flash column chromatography to give 710 mg (*(E)*-2-bromostyryl)cyclopropane-1,2-diyl)dibenzene as a colorless solid in 84% yield.

m.p. 114-116 °C

<sup>1</sup>H NMR (500 MHz, CDCl<sub>3</sub>) δ 7.58 (dd, *J* = 8.1, 1.3 Hz, 1H), 7.56 (dd, *J* = 7.9, 1.7 Hz, 1H), 7.29 (dd, *J* = 7.7 Hz, 1H), 7.20 - 7.08 (m, 7H), 7.05 - 6.99 (m, 5H), 6.15 (dd, *J* = 15.6, 8.3 Hz, 1H), 2.72 (d, *J* = 5.6 Hz, 2H), 2.61 - 2.56 (m, 1H). <sup>13</sup>C NMR (126 MHz, CDCl<sub>3</sub>) δ 137.19, 137.13, 135.37, 132.98, 128.94, 128.24, 127.87, 127.58, 127.44, 126.51, 126.01, 123.11, 33.49, 30.01.

HRMS-APCI calculated for C<sub>23</sub>H<sub>20</sub>Br [M+H]<sup>+</sup>: 375.0743; found: 375.0740

The title compound was prepared according to general procedure A from (*(E)*-2-bromostyryl)cyclopropane-1,2-diyl)dibenzene as colorless oil in 84% yield.

<sup>1</sup>H NMR (400 MHz, CDCl<sub>3</sub>) δ 7.54 (dd, *J* = 7.4, 1.8 Hz, 1H), 7.49 (dd, *J* = 7.4, 1.7 Hz, 1H), 7.35 - 7.29 (m, 2H), 7.18 - 7.09 (m, 6H), 6.99 - 6.95 (m, 4H), 6.82 - 6.76 (m, 3H), 6.34 - 6.30 (m, 2H), 5.99 (dd, *J* = 15.5, 8.3 Hz, 1H), 5.47 (dd, *J* = 9.1, 5.4 Hz, 2H), 3.13 - 3.09 (m, 1H), 2.63 (d, *J* = 5.5 Hz, 2H), 2.46 (dt, *J* = 8.3, 5.6 Hz, 1H). <sup>13</sup>C NMR (101 MHz, CDCl<sub>3</sub>) δ 140.30, 137.39, 136.53, 134.51, 130.94, 128.95, 127.80, 127.65, 127.39, 126.88, 126.77, 126.49, 126.46, 125.90, 124.49, 42.31, 33.29, 30.11.

HRMS-APCI calculated for C<sub>30</sub>H<sub>27</sub> [M+H]<sup>+</sup>: 387.2107; found: 387.2105

#### 1,4-Bis(*(E)*-2-(cyclohepta-2,4,6-trien-1-yl)styryl)benzene (71)

(4) Castellino, A. J.; Bruce, T. C. *J. Am. Chem. Soc.* **1988**, *110*, 7512–7519.



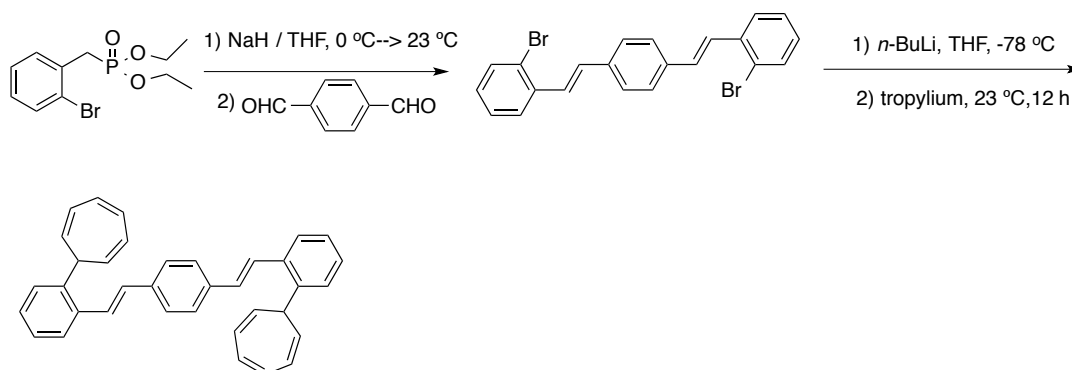

To a suspension of NaH (60% in oil, 217 mg, 5.42 mmol) in THF (4 mL) at 0 °C was slowly added diethyl 2-bromobenzylphosphonate (1.51 g, 4.92 mmol). The resulting suspension was stirred for 1 h at room temperature (23 °C). The reaction mixture was cooled to 0 °C, and then a solution of terephthalaldehyde (300 mg, 2.24 mmol) in THF (2 mL) was added dropwise and slowly warmed to room temperature. After stirring for 2 d at room temperature, (during which time a precipitate formed) the reaction was quenched with ice water and the precipitate was collected by filtering, and washed with Et<sub>2</sub>O and water, dried with vacuum. 1,4-bis((*E*)-2-bromostyryl)benzene was obtained as a light yellow solid. (620 mg, 63%).

m.p. 170-172 °C

<sup>1</sup>H NMR (400 MHz, CDCl<sub>3</sub>) δ 7.71 (dd, *J* = 7.9, 1.6 Hz, 2H), 7.62 (dd, *J* = 8.1, 1.2 Hz, 2H), 7.59 (s, 4H), 7.53 (d, *J* = 16.2 Hz, 2H), 7.35 (td, *J* = 7.6, 1.2 Hz, 2H), 7.15 (td, *J* = 7.7, 1.7 Hz, 2H), 7.08 (d, *J* = 16.1 Hz, 2H). <sup>13</sup>C NMR (101 MHz, CDCl<sub>3</sub>) δ 137.0, 136.8, 133.1, 130.9, 128.8, 127.5, 127.2, 126.6, 124.2.

HRMS-LDI+ calculated for C<sub>22</sub>H<sub>16</sub>Br<sub>2</sub> [M]<sup>+</sup>: 437.9619; found: 437.9621

The title compound was prepared according to general procedure A-2 from the 1,4-bis((*E*)-2-bromostyryl)benzene as yellow solid in 41% yield.

m.p. 161–163 °C

<sup>1</sup>H NMR (500 MHz, CDCl<sub>3</sub>) δ 7.73 - 7.66 (m, 2H), 7.54 - 7.26 (m, 12H), 6.97 (d, *J* = 16.0 Hz, 2H), 6.80 (t, *J* = 3.1 Hz, 4H), 6.32 - 6.30 (m, 4H), 5.50 (dd, *J* = 9.0, 5.3 Hz, 4H), 3.15 - 3.08 (m, 2H). <sup>13</sup>C NMR (126 MHz, CDCl<sub>3</sub>) δ 141.0, 136.9, 136.3, 130.9, 130.1, 127.9, 127.7, 126.9, 126.8, 126.6, 126.5, 126.5, 124.5, 42.6.

HRMS-LDI+ calculated for C<sub>36</sub>H<sub>29</sub> [M-H]<sup>+</sup>: 461.2269; found: 461.2264

### 2'-(Cyclohepta-2,4,6-trien-1-yl)-2,3,4,5-tetrahydro-1,1'-biphenyl (7m)

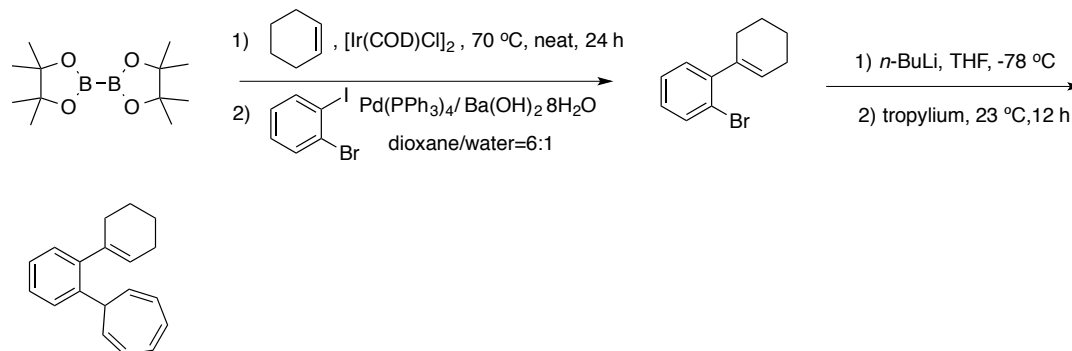

2'-bromo-2,3,4,5-tetrahydro-1,1'-biphenyl was prepared according to a reported procedure.<sup>5</sup>

[Ir(COD)Cl]<sub>2</sub> (2 mol %, 20 mg) and bis(pinacolato)diboron (1.5 mmol, 381 mg) were dissolved in 1 mL neat cyclohexene. The reaction mixture was stirred at 70 °C for 24 h under argon. After cooling to room temperature the reaction mixture was diluted with a dioxane/water (6:1) mixture (4 ml), then 2-bromiodobenzene (1.5 mmol), Pd(PPh<sub>3</sub>)<sub>4</sub> (5 mol %, 80 mg) and Ba(OH)<sub>2</sub>·8H<sub>2</sub>O (3.0 mmol, 946 mg) were added. Then stirring was continued for 24 h at 70 °C. The crude reaction mixture was evaporated and the residue was purified by silica gel column chromatography to give 240 mg aryl bromide as colorless oil in 67% yield.

<sup>1</sup>H NMR (400 MHz, CDCl<sub>3</sub>) δ 7.55 (dd, *J* = 8.0, 1.2 Hz, 1H), 7.25 (td, *J* = 7.4, 1.2 Hz, 1H), 7.17 (dd, *J* = 7.6, 1.9 Hz, 1H), 7.10 (td, *J* = 7.9, 1.8 Hz, 1H), 5.65 (tt, *J* = 3.8, 1.8 Hz, 1H), 2.32 – 2.28 (m, 2H), 2.22 – 2.16 (m, 2H), 1.83 – 1.76 (m, 2H), 1.75 – 1.66 (m, 2H). <sup>13</sup>C NMR (101 MHz, CDCl<sub>3</sub>) δ 145.4, 139.1, 132.6, 130.0, 127.9, 127.1, 127.0, 122.5, 29.3, 25.3, 22.8, 21.9.

HRMS-EI calculated for C<sub>12</sub>H<sub>13</sub>Br [M]<sup>+</sup>: 236.0201; found: 236.0204

This title compound was prepared as a colorless oil in 55% yield according to the general procedure A from 2'-bromo-2,3,4,5-tetrahydro-1,1'-biphenyl.

<sup>1</sup>H NMR (400 MHz, CDCl<sub>3</sub>) δ 7.55 (dd, *J* = 7.8, 1.4 Hz, 1H), 7.35 (td, *J* = 7.5, 1.5 Hz, 1H), 7.25 (td, *J* = 7.4, 1.4 Hz, 1H), 7.14 (dd, *J* = 7.7, 1.5 Hz, 1H), 6.73 (t, *J* = 3.2 Hz, 2H), 6.26 – 6.22 (m, 2H), 5.49 – 5.47 (m, 1H), 5.37 (dd, *J* = 9.0, 5.4 Hz, 2H), 2.95 (t, *J* = 5.6 Hz, 1H), 2.10 – 2.03 (m, 4H), 1.64 – 1.51 (m, 4H). <sup>13</sup>C NMR (101 MHz, CDCl<sub>3</sub>) δ 144.7, 141.5, 138.0, 130.6, 128.4, 127.8, 127.1, 126.1, 126.1, 124.0, 42.0, 30.9, 25.2, 22.9, 22.0.

HRMS-EI calculated for C<sub>19</sub>H<sub>20</sub> [M]<sup>+</sup>: 248.1565; found: 248.1562

#### (*E*)-1,2-Bis(2-(cyclohepta-2,4,6-trien-1-yl)phenyl)ethane (7n)

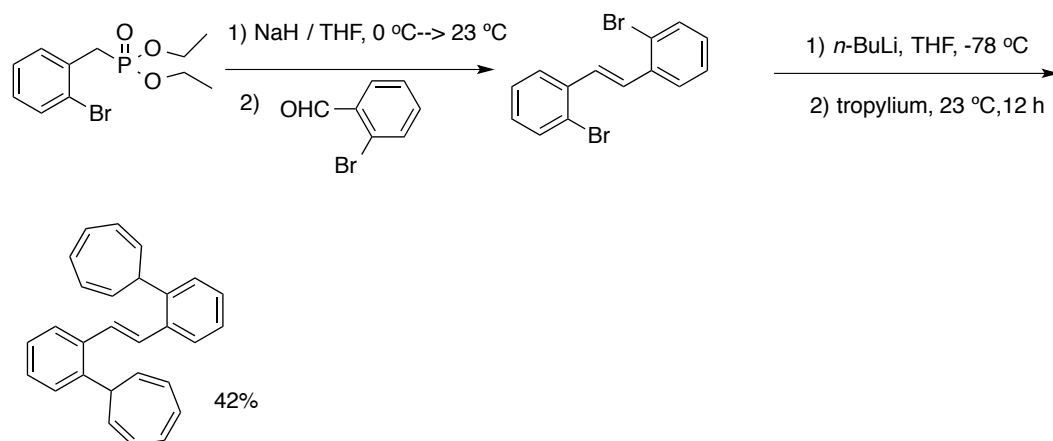

To a suspension of NaH (60% in oil, 145 mg, 3.63 mmol) in THF (4 mL) at 0 °C was slowly added diethyl 2-bromobenzylphosphonate (1 g, 3.3 mmol). The resulting suspension was stirred for 1 h at room temperature (23 °C). The reaction mixture was cooled to 0 °C, and then a solution of 2-bromobenzaldehyde (611 mg, 3.3 mmol) in THF (2 mL) was added dropwise and slowly warmed to room temperature. After stirring overnight, the reaction was quenched with ice water and the aqueous phase

(5) Olsson, V. J.; Szabó, K. J. *Angew. Chem. Int. Ed.* **2007**, *46*, 6891–6893.

was extracted with Et<sub>2</sub>O. The combined organic layers were washed with brine and dried over Na<sub>2</sub>SO<sub>4</sub>. After concentration in vacuo, the residue was purified by silica gel flash column chromatography to give 730 mg (*E*)-1,2-bis(2-bromophenyl)ethene as a colorless solid in 65% yield. The spectroscopic data match with those reported in the literature.<sup>6</sup>

The title compound was prepared according to general procedure A-2 from (*E*)-1,2-bis(2-bromophenyl)ethene as white solid in 42% yield.

m.p. 135-137°C

<sup>1</sup>H NMR (300 MHz, CDCl<sub>3</sub>) δ 7.56-7.48 (m, 4H), 7.38-7.27 (m, 4H), 7.10 (s, 2H), 6.76 (t, *J* = 3.1 Hz, 4H), 6.29 (d, *J* = 9.0 Hz, 4H), 5.45 (dd, *J* = 9.1, 5.5 Hz, 4H), 3.10 (t, *J* = 5.4 Hz, 2H). <sup>13</sup>C NMR (75 MHz, CDCl<sub>3</sub>) δ 141.0, 136.6, 130.9, 128.5, 127.9, 127.6, 126.9, 126.7, 126.5, 124.5, 42.4.

HRMS-MALDI: calculated for C<sub>28</sub>H<sub>24</sub> [M]<sup>+</sup>: 360.1878; found: 360.1935

**(*E*)-7-(4-Methyl-2-styrylphenyl)cyclohepta-1,3,5-triene (7p)**

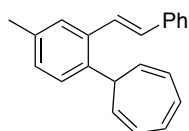

This compound was prepared as a white solid in 59% yield according to the general procedure A from (*E*)-1-bromo-4-methyl-2-styrylbenzene.<sup>7</sup>

m.p. 75-76 °C

<sup>1</sup>H NMR (400 MHz, CDCl<sub>3</sub>) δ 7.51 (s, 1H), 7.44 (d, *J* = 7.8 Hz, 2H), 7.40 (d, *J* = 7.8 Hz, 1H), 7.36 (t, *J* = 7.7 Hz, 2H), 7.31 - 7.24 (m, 2H), 7.18 (dd, *J* = 7.9, 1.9 Hz, 1H), 6.96 (d, *J* = 16.0 Hz, 1H), 6.78 (t, *J* = 3.2 Hz, 2H), 6.34 - 6.28 (m, 2H), 5.47 (dd, *J* = 9.1, 5.5 Hz, 2H), 3.09 (t, *J* = 5.6 Hz, 1H), 2.43 (s, 3H). <sup>13</sup>C NMR (126 MHz, CDCl<sub>3</sub>) δ 138.2, 137.6, 136.3, 136.1, 130.9, 130.3, 128.7, 128.6, 127.6, 127.5, 127.1, 126.9, 126.6, 126.5, 124.4, 42.2, 21.1.

HRMS-APCI calculated for C<sub>22</sub>H<sub>21</sub> [M+H]<sup>+</sup>: 285.1643; found: 285.1613

**(*E*)-7-(4-Methyl-2-(oct-1-en-1-yl)phenyl)cyclohepta-1,3,5-triene (7q)**

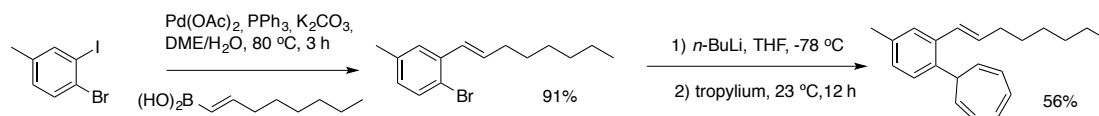

**(*E*)-1-Bromo-4-methyl-2-(oct-1-en-1-yl)benzene**

To a DME/H<sub>2</sub>O (5 ml / 2 ml) solution of 15 mg Pd(OAc)<sub>2</sub>, 50 mg PPh<sub>3</sub>, 424 mg K<sub>2</sub>CO<sub>3</sub> and 243 mg (1.56 mmol) (*E*)-oct-1-en-1-ylboronic acid was added 1-bromo-2-iodo-4-methylbenzene (420 mg, 1.41 mmol) at room temperature. The mixture was then heated at 80 °C for 3 h. After cooling to room temperature, the mixture was

(6) Wyatt, P.; Hudson, A.; Charmant, J.; Orpen, A. G.; Phetmung, H. *Org. Biomol. Chem.* **2006**, *4*, 2218–2232.

(7) (*E*)-1-Bromo-4-methyl-2-styrylbenzene is a known compound: Watanabe, S.; Yamamoto, K.; Itagaki, Y.; Iwamura, T.; Iwama, T.; Kataoka, T. *Tetrahedron* **2000**, *56*, 855–863. It can be also prepared by the Heck reaction of 1-bromo-2-iodo-4-methylbenzene with styrene.

quenched by adding saturated  $\text{NH}_4\text{Cl}_{(\text{aq})}$ . The mixture was extracted with ethyl acetate, and the combined organic extracts were dried over  $\text{MgSO}_4$ . The solvent was removed in vacuo, and the crude residue was purified by silica gel flash column chromatography ( $\text{SiO}_2$ , c-hexane) to give (*E*)-1-bromo-4-methyl-2-(oct-1-en-1-yl)benzene (360 mg) colorless oil in 91% yield.

$^1\text{H}$  NMR (400 MHz,  $\text{CDCl}_3$ )  $\delta$  7.41 (d,  $J = 8.2$  Hz, 1H), 7.32 (s, 1H), 6.89 (d,  $J = 8.2$  Hz, 1H), 6.69 (d,  $J = 15.7$  Hz, 1H), 6.18 (dt,  $J = 15.7, 7.0$  Hz, 1H), 2.32 (s, 3H), 2.30 - 2.22 (m, 2H), 1.54 - 1.46 (m, 2H), 1.41 - 1.30 (m, 6H), 0.92 (t,  $J = 6.9$  Hz, 3H).

HRMS-APCI calculated for  $\text{C}_{15}\text{H}_{22}\text{Br}$   $[\text{M}+\text{H}]^+$ : 281.0899; found: 281.0901

#### (*E*)-7-(4-Methyl-2-(oct-1-en-1-yl)phenyl)cyclohepta-1,3,5-triene

The title compound was prepared as a colorless oil in 56% yield according to general procedure A from (*E*)-1-bromo-4-methyl-2-(oct-1-en-1-yl)benzene.

$^1\text{H}$  NMR (400 MHz,  $\text{CDCl}_3$ )  $\delta$  7.33 (d,  $J = 7.8$  Hz, 1H), 7.30 (s, 1H), 7.11 (d,  $J = 7.8$  Hz, 1H), 6.75 (dd,  $J = 3.6, 2.6$  Hz, 2H), 6.48 (d,  $J = 15.6$  Hz, 1H), 6.31 - 6.24 (m, 2H), 6.03 (dt,  $J = 15.5, 7.0$  Hz, 1H), 5.50 - 5.36 (m, 2H), 3.03 - 2.97 (m, 1H), 2.38 (s, 3H), 2.16 (qd,  $J = 7.1, 1.5$  Hz, 2H), 1.47 - 1.40 (m, 2H), 1.35 - 1.27 (m, 6H), 0.92 (d,  $J = 6.8$  Hz, 3H).  $^{13}\text{C}$  NMR (101 MHz,  $\text{CDCl}_3$ )  $\delta$  137.38, 136.99, 136.08, 133.24, 130.79, 127.94, 127.63, 127.41, 127.37, 127.22, 124.23, 42.00, 33.20, 31.74, 29.28, 28.80, 22.65, 21.06, 14.12.

HRMS-APCI calculated for  $\text{C}_{22}\text{H}_{29}$   $[\text{M}+\text{H}]^+$ : 293.2264; found: 293.2263

#### (*E*)-7-(4-Methoxy-2-styrylphenyl)cyclohepta-1,3,5-triene (7r)

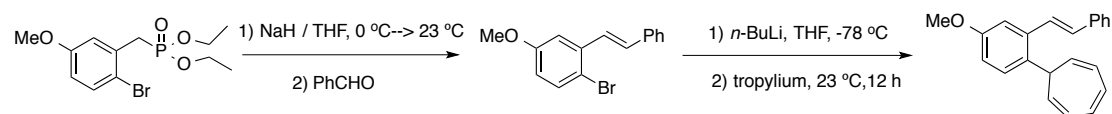

To a suspension of NaH (60% in oil, 131 mg, 3.28 mmol) in THF (4 mL) at 0 °C was slowly added diethyl 2-bromo-5-methoxybenzylphosphonate (1 g, 3 mmol). The resulting suspension was stirred for an additional 1 h at room temperature (23 °C). The reaction mixture was cooled to 0 °C, and then a solution of benzaldehyde (290 mg, 2.73 mmol) in THF (1 mL) was added dropwise and slowly warmed to room temperature. After stirring overnight (12 h), the reaction was quenched with ice water and extracted with  $\text{Et}_2\text{O}$ , dried with  $\text{MgSO}_4$ . (*E*)-1-bromo-4-methoxy-2-styrylbenzene was obtained as a colorless solid by silica gel column chromatography. (612 mg, 78%).

m.p. 65-67 °C

$^1\text{H}$  NMR (500 MHz,  $\text{CDCl}_3$ )  $\delta$  7.59 (d,  $J = 7.5$  Hz, 2H), 7.50 (d,  $J = 8.8$  Hz, 1H), 7.45 (d,  $J = 16.2$  Hz, 1H), 7.41 (t,  $J = 7.6$  Hz, 2H), 7.33 (t,  $J = 7.4$  Hz, 1H), 7.22 (d,  $J = 3.0$  Hz, 1H), 7.05 (d,  $J = 16.2$  Hz, 1H), 6.75 (dd,  $J = 8.8, 3.0$  Hz, 1H), 3.88 (s, 3H).  $^{13}\text{C}$  NMR (126 MHz,  $\text{CDCl}_3$ )  $\delta$  159.04, 137.85, 136.92, 133.58, 131.51, 128.75, 128.14, 127.55, 126.88, 115.08, 114.95, 111.81, 55.56.

HRMS-APCI calculated for  $\text{C}_{15}\text{H}_{14}\text{BrO}$   $[\text{M}+\text{H}]^+$ : 289.0223; found: 289.0218

#### (*E*)-7-(4-Methoxy-2-styrylphenyl)cyclohepta-1,3,5-triene

The title compound was prepared according to general procedure A as colorless oil in 86% yield from (*E*)-1-bromo-4-methoxy-2-styrylbenzene.

$^1\text{H}$  NMR (300 MHz,  $\text{CDCl}_3$ )  $\delta$  7.44 - 6.92 (m, 10H), 6.77 (t,  $J = 3.2$  Hz, 2H), 6.31 - 6.26 (m, 2H), 5.51 - 5.38 (m, 2H), 3.90 (s, 3H), 3.04 (t,  $J = 5.5$  Hz, 1H).  $^{13}\text{C}$  NMR (75 MHz,  $\text{CDCl}_3$ )  $\delta$  158.37, 137.50, 137.42, 133.61, 130.93, 130.69, 128.81, 128.67, 127.69, 127.03, 126.59, 126.55, 124.39, 113.56, 111.62, 55.39, 41.95.

HRMS-APCI calculated for  $\text{C}_{22}\text{H}_{21}\text{O}$   $[\text{M}+\text{H}]^+$ : 301.1587; found: 301.1587

**(E)-7-(2-styrylphenyl)cyclohepta-1,3,5-triene-d<sub>1</sub> (7a-d<sub>1</sub>)**

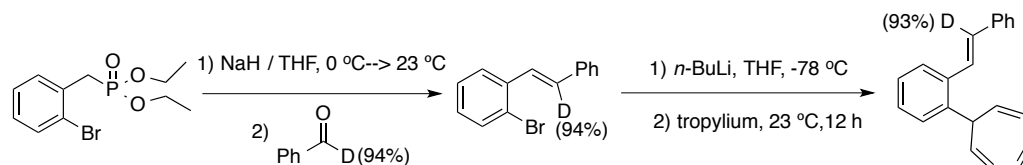

The isotopically labeled (*E*)-1-bromo-2-styrylbenzene-d<sub>1</sub><sup>8</sup> was synthesized as follows:

To a suspension of NaH (60% in oil, 145 mg, 3.63 mmol) in THF (4 mL) at 0 °C was slowly added diethyl 2-bromobenzylphosphonate (1 g, 3.3 mmol). The resulting suspension was stirred for an additional 1 h at room temperature (23 °C). The reaction mixture was cooled to 0 °C, and then a solution of benzaldehyde- $\alpha$ -d<sub>1</sub><sup>9</sup> (353 mg, 3.3 mmol) in THF (2 mL) was added dropwise and slowly warmed to room temperature. After stirring overnight (12h), the reaction was quenched with ice water and the aqueous phase was extracted with  $\text{Et}_2\text{O}$ . The combined organic layers were washed with brine and dried over  $\text{Na}_2\text{SO}_4$ . After concentration in vacuo, the residue was purified by silica gel flash column chromatography to give 650 mg isotopically labeled (*E*)-1-bromo-2-styrylbenzene-d<sub>1</sub> as colorless oil in 76% yield.

$^1\text{H}$  NMR (400 MHz,  $\text{CDCl}_3$ )  $\delta$  7.70 (dd,  $J = 7.8, 1.7$  Hz, 1H), 7.63 - 7.57 (m, 3H), 7.50 (s, 1H), 7.42 (t,  $J = 7.5$  Hz, 2H), 7.38 - 7.30 (m, 2H), 7.15 (td,  $J = 7.8, 1.7$  Hz, 1H), 7.08 (d,  $J = 16.1$  Hz, 6% residual signal).  $^{13}\text{C}$  NMR (101 MHz,  $\text{CDCl}_3$ )  $\delta$  137.1, 136.9, 133.0, 131.1 (t,  $J_{\text{CD}} = 23.5$  Hz), 128.7, 128.7, 128.0, 127.5, 127.3, 126.8, 126.7, 124.1.

HRMS-APCI calculated for  $\text{C}_{14}\text{H}_{11}\text{DBr}$   $[\text{M}+\text{H}]^+$ : 260.0185; found: 260.0189

The title compound was prepared according to general procedure A from isotopically labeled (*E*)-1-bromo-2-styrylbenzene-d<sub>1</sub> as yellow oil in 82% yield.

$^1\text{H}$  NMR (400 MHz,  $\text{CDCl}_3$ )  $\delta$  7.69 (dd,  $J = 6.9, 2.2$  Hz, 1H), 7.52 - 7.42 (m, 3H), 7.39 - 7.26 (m, 6H), 6.96 (residual signal, 7%), 6.78 (t,  $J = 3.2$  Hz, 2H), 6.35 - 6.30 (m, 2H), 5.47 (dd,  $J = 9.0, 5.4$  Hz, 2H), 3.12 (tt,  $J = 5.6, 1.6$  Hz, 1H).  $^{13}\text{C}$  NMR (126 MHz,  $\text{CDCl}_3$ )  $\delta$  141.0, 137.4, 136.4, 130.9, 130.2 (t,  $J = 23.1$  Hz), 128.6, 127.9, 127.6, 127.6, 126.9, 126.6, 126.5, 126.4, 124.5, 42.5.

HRMS-APCI calculated for  $\text{C}_{21}\text{H}_{18}\text{D}$   $[\text{M}+\text{H}]^+$ : 272.1550; found: 272.1538

**(Z)-7-(2-Styrylphenyl)cyclohepta-1,3,5-triene (cis-7a)**

(8) Xue, F.; Li, X.; Wan, B. *J. Org. Chem.* **2011**, *76*, 7256–7262.

(9) Gajewski, J. J.; Bocian, W.; Harris, N. J.; Olson, L.P.; Gajewski, J. P. *J. Am. Chem. Soc.* **1999**, *121*, 326–334.

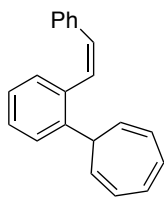

This compound was prepared as a colorless oil from (*Z*)-1-bromo-2-styrylbenzene<sup>10</sup> in 78% yield according to the general procedure A.

<sup>1</sup>H NMR (400 MHz, CDCl<sub>3</sub>) δ 7.55 (dd, *J* = 7.8, 1.2 Hz, 1H), 7.35 (td, *J* = 7.5, 1.8 Hz, 1H), 7.22 - 7.13 (m, 5H), 7.12 - 7.03 (m, 2H), 6.71 (t, *J* = 3.2 Hz, 2H), 6.61 (d, *J* = 12.1 Hz, 1H), 6.55 (d, *J* = 12.0 Hz, 1H), 6.25 - 6.19 (m, 2H), 5.38 (dd, *J* = 9.1, 5.5 Hz, 2H), 3.09 - 3.05 (m, 1H). <sup>13</sup>C NMR (101 MHz, CDCl<sub>3</sub>) δ 141.7, 136.9, 136.6, 131.0, 130.7, 129.7, 129.1, 129.0, 128.0, 127.8, 127.3, 127.0, 126.5, 126.3, 124.5, 42.4.

HRMS-EI calculated for C<sub>21</sub>H<sub>18</sub> [M]<sup>+</sup>: 270.1409; found: 270.1400

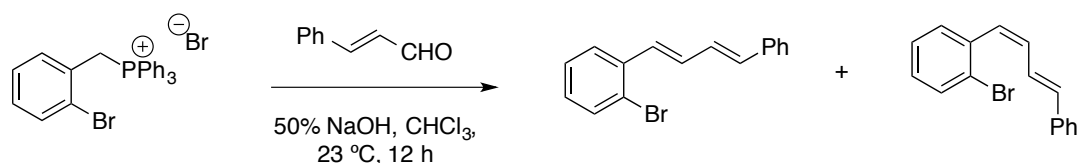

To a solution of 2-bromobenzyltriphenylphosphonium bromide (2 g, 3.9 mmol) and (*E*)-cinnamaldehyde (516 mg, 3.9 mmol) in 30 mL chloroform was slowly added 50% NaOH<sub>(aq)</sub> (780 mg NaOH, 19.5 mmol). The resulting mixture was stirred overnight (12 h) at room temperature (23 °C). The layers were separated, and the aqueous phase extracted twice with DCM. The combined organic extracts were washed with water then dried over MgSO<sub>4</sub>. After concentration in vacuo, 5 mL *c*-hexane was added and the resulting triphenylphosphine oxide precipitate was removed by filtration. The *c*-hexane solution was passed through a short pad of silica gel then concentrated in vacuo to give 860 mg colorless oil (77%, *Z*:*E* = 1:1). The pure samples of *Z* (320mg, colorless oil) and *E* (280mg, light yellow solid) products were obtained by very careful silica gel chromatography using *c*-hexane as eluent.

**Note:** The (1*E*,3*E*) sample can be also prepared from diethyl 2-bromobenzylphosphonate and (*E*)-cinnamaldehyde using the same procedure described for deuterated (*E*)-1-bromo-2-styrylbenzene synthesis shown in this SI as well. By using this HWE olefination, only the desired (1*E*,3*E*) isomer was obtained, and the purification is easier.

### 1-Bromo-2-((1*E*,3*E*)-4-phenylbuta-1,3-dien-1-yl)benzene

m.p. 104-105 °C

<sup>1</sup>H NMR (500 MHz, CDCl<sub>3</sub>) δ 7.65 (dd, *J* = 7.9, 1.6 Hz, 1H), 7.59 (dd, *J* = 8.0, 1.2 Hz, 1H), 7.49 (d, *J* = 7.8 Hz, 2H), 7.37 (t, *J* = 7.7 Hz, 2H), 7.33 - 7.26 (m, 2H), 7.12 (ddd, *J* = 8.0, 7.3, 1.6 Hz, 1H), 7.08 - 7.03 (m, 2H), 6.97 - 6.90 (m, 1H), 6.75 (d, *J* = 16.1 Hz, 1H). <sup>13</sup>C NMR (126 MHz, CDCl<sub>3</sub>) δ 137.1, 136.9, 134.0, 133.1, 131.8, 131.0, 129.0, 128.7, 128.6, 127.8, 127.4, 126.5, 126.3, 123.9.

### 1-Bromo-2-((1*Z*,3*E*)-4-phenylbuta-1,3-dien-1-yl)benzene

(10) de Meijere, A.; Zhong Song, Z.; Lansky, A.; Hyuda, S.; Rauch, K.; Noltemeyer, M.; König, B.; Knieriem, B. *Eur. J. Org. Chem.*, **1998**, 2289–2299.

$^1\text{H}$  NMR (400 MHz,  $\text{CDCl}_3$ )  $\delta$  7.65 (dd,  $J = 8.0, 1.2$  Hz, 1H), 7.47 (dd,  $J = 7.7, 1.7$  Hz, 1H), 7.41 - 7.22 (m, 6H), 7.18 (td,  $J = 7.7, 1.7$  Hz, 1H), 7.12 (dd,  $J = 15.6, 10.4$  Hz, 1H), 6.77 (d,  $J = 15.6$  Hz, 1H), 6.63 - 6.50 (m, 2H).  $^{13}\text{C}$  NMR (126 MHz,  $\text{CDCl}_3$ )  $\delta$  137.4, 137.1, 135.4, 132.7, 131.2, 131.2, 129.7, 128.6, 128.6, 127.8, 127.0, 126.6, 124.7, 124.0.

HRMS-MALDI: calculated for  $\text{C}_{16}\text{H}_{13}\text{Br}$   $[\text{M}]^+$ : 284.0195; found: 284.0166

**7-(2-((1E,3E)-4-Phenylbuta-1,3-dien-1-yl)phenyl)cyclohepta-1,3,5-triene (7g)**

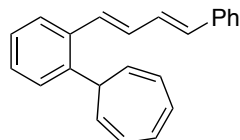

This compound was prepared as a white solid in 82% yield according to the general procedure A from 1-bromo-2-((1E,3E)-4-phenylbuta-1,3-dien-1-yl)benzene.

m.p. 124-125 °C

$^1\text{H}$  NMR (500 MHz,  $\text{CDCl}_3$ )  $\delta$  7.68 - 7.64 (m, 1H), 7.49 - 7.44 (m, 3H), 7.37 - 7.30 (m, 4H), 7.25 (t,  $J = 7.3$  Hz, 1H), 6.94 (ddd,  $J = 15.5, 5.9, 4.1$  Hz, 1H), 6.90 - 6.84 (m, 2H), 6.79 (dd,  $J = 3.7, 2.7$  Hz, 2H), 6.68 (d,  $J = 15.3$  Hz, 1H), 6.36 - 6.29 (m, 2H), 5.45 (dd,  $J = 9.0, 5.3$  Hz, 2H), 3.10 (t,  $J = 5.6$  Hz, 1H).  $^{13}\text{C}$  NMR (126 MHz,  $\text{CDCl}_3$ )  $\delta$  140.8, 137.3, 136.1, 132.8, 131.0, 130.9, 130.3, 129.5, 128.6, 127.9, 127.5, 126.8, 126.8, 126.4, 126.2, 124.5, 42.4.

HRMS-APCI calculated for  $\text{C}_{23}\text{H}_{21}$   $[\text{M}+\text{H}]^+$ : 297.1643; found: 297.1650

**7-(2-((1Z,3E)-4-Phenylbuta-1,3-dien-1-yl)phenyl)cyclohepta-1,3,5-triene (7u)**

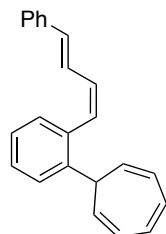

This compound was prepared as a colorless oil in 49% yield according to the general procedure A from 1-bromo-2-((1Z,3E)-4-phenylbuta-1,3-dien-1-yl)benzene.

$^1\text{H}$  NMR (400 MHz,  $\text{CDCl}_3$ )  $\delta$  7.57 (d,  $J = 7.8$  Hz, 1H), 7.43 - 7.21 (m, 8H), 7.07 (ddd,  $J = 15.6, 10.9, 0.9$  Hz, 1H), 6.73 (dd,  $J = 3.6, 2.8$  Hz, 2H), 6.67 (d,  $J = 15.6$  Hz, 1H), 6.51 (d,  $J = 11.3$  Hz, 1H), 6.42 (td,  $J = 11.1, 0.8$  Hz, 1H), 6.31 - 6.24 (m, 2H), 5.42 (dd,  $J = 8.8, 5.4$  Hz, 2H), 3.02 (ddd,  $J = 5.4, 3.9, 1.5$  Hz, 1H).  $^{13}\text{C}$  NMR (101 MHz,  $\text{CDCl}_3$ )  $\delta$  142.0, 137.3, 136.3, 134.3, 131.0, 130.8, 130.5, 129.3, 128.5, 127.9, 127.6, 127.3, 126.5, 126.4, 126.3, 125.4, 124.6, 42.46.

HRMS-MALDI: calculated for  $\text{C}_{23}\text{H}_{19}$   $[\text{M}-\text{H}]^+$ : 295.1481; found: 295.1496

**Experimental Details for the Synthesis of *o*-Aryl Cycloheptatrienes**

**2-(Cyclohepta-2,4,6-trien-1-yl)-1,1'-biphenyl (17a)**

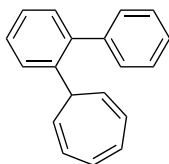

2-Biphenylmagnesium bromide solution (0.5 M, 5.6 mL, 2.8 mmol) was added dropwise to a solution of tropylium tetrafluoroborate (500 mg, 2.8 mmol) in 10 mL dry THF at 0 °C under argon. The reaction was then stirred at room temperature (23 °C) overnight (12 h). The reaction was quenched by addition of water. The aqueous phase was extracted with ether, the combined organic extracts were dried over MgSO<sub>4</sub>, and the solvent was evaporated. The crude reaction mixture was purified by chromatography to give the title compound (460 mg) as a colorless solid in 67% yield.

m.p. 48-50 °C

<sup>1</sup>H NMR (400 MHz, CDCl<sub>3</sub>) δ 7.64 (dd, *J* = 7.9, 1.3 Hz, 1H), 7.45 (td, *J* = 7.5, 1.7 Hz, 1H), 7.37 - 7.18 (m, 7H), 6.57 (t, *J* = 3.2 Hz, 2H), 6.22 - 6.13 (m, 2H), 5.37 (dd, *J* = 9.0, 5.3 Hz, 2H), 2.88 (t, *J* = 5.2 Hz, 1H). <sup>13</sup>C NMR (101 MHz, CDCl<sub>3</sub>) δ 141.9, 141.0, 130.5, 130.1, 129.2, 128.0, 127.8, 127.7, 127.6, 126.8, 126.3, 124.1, 41.9.

HRMS-APCI calculated for C<sub>19</sub>H<sub>17</sub> [M+H]<sup>+</sup>: 245.1330; found: 245.1334

#### 4'-(*tert*-Butyl)-2-(cyclohepta-2,4,6-trien-1-yl)-1,1'-biphenyl (17b)

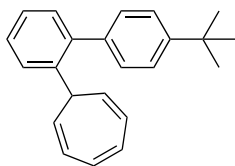

This compound was prepared as a colorless solid in 76% yield according to the general procedure A.

m.p. 87-89 °C

<sup>1</sup>H NMR (500 MHz, CDCl<sub>3</sub>) δ 7.66 (dd, *J* = 7.8, 1.1 Hz, 1H), 7.46 (t, *J* = 7.8 Hz, 1H), 7.38 - 7.31 (m, 4H), 7.19 (d, *J* = 8.4 Hz, 2H), 6.61 (t, *J* = 3.2 Hz, 2H), 6.25 - 6.16 (m, 2H), 5.40 (dd, *J* = 9.1, 5.2 Hz, 2H), 3.00 (t, *J* = 5.2 Hz, 1H), 1.35 (s, 9H). <sup>13</sup>C NMR (126 MHz, CDCl<sub>3</sub>) δ 149.6, 142.0, 141.7, 137.9, 130.5, 130.3, 128.9, 127.8, 127.8, 127.7, 126.2, 124.7, 124.1, 41.9, 34.4, 31.3.

HRMS-APCI calculated for C<sub>23</sub>H<sub>25</sub> [M+H]<sup>+</sup>: 301.1956; found: 301.1957

#### 2-(Cyclohepta-2,4,6-trien-1-yl)-1,1':4',1''-terphenyl (17c)

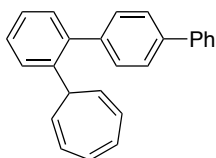

This compound was prepared as a white solid in 59% yield according to the general procedure A.

m.p. 86-89 °C

<sup>1</sup>H NMR (500 MHz, CDCl<sub>3</sub>) δ 7.69 (d, *J* = 7.6 Hz, 1H), 7.63 (d, *J* = 8.0 Hz, 2H), 7.57 (d, *J* = 8.2 Hz, 2H), 7.52 - 7.44 (m, 3H), 7.39 - 7.32 (m, 5H), 6.60 (t, *J* = 3.2 Hz, 2H),



6.24 – 6.21 (m, 2H), 5.43 (dd,  $J = 9.0, 5.3$  Hz, 2H), 3.00 (t,  $J = 5.3$  Hz, 1H).  $^{13}\text{C}$  NMR (126 MHz,  $\text{CDCl}_3$ )  $\delta$  142.0, 141.4, 140.7, 140.0, 139.5, 130.6, 130.1, 129.7, 128.7, 128.0, 127.9, 127.6, 127.2, 127.0, 126.5, 126.3, 124.2, 41.9.

HRMS-APCI calculated for  $\text{C}_{25}\text{H}_{21}$   $[\text{M}+\text{H}]^+$ : 321.1643; found: 321.1647

### 2-(Cyclohepta-2,4,6-trien-1-yl)-4'-methoxy-1,1'-biphenyl (17d)

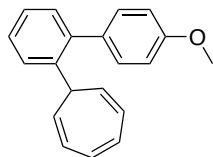

This compound was prepared as a white solid in 76% yield according to the general procedure A.

m.p. 74-75 °C

$^1\text{H}$  NMR (400 MHz,  $\text{CDCl}_3$ )  $\delta$  7.66 (dd,  $J = 7.6, 1.2$  Hz, 1H), 7.46 (td,  $J = 7.5, 1.8$  Hz, 1H), 7.38 - 7.29 (m, 2H), 7.18 (d,  $J = 8.7$  Hz, 2H), 6.87 (d,  $J = 8.7$  Hz, 2H), 6.62 (dd,  $J = 3.6, 2.6$  Hz, 2H), 6.20-6.22 (m, 2H), 5.40 (dd,  $J = 9.0, 5.3$  Hz, 2H), 3.83 (s, 3H), 2.91 (t,  $J = 5.3$  Hz, 1H).  $^{13}\text{C}$  NMR (101 MHz,  $\text{CDCl}_3$ )  $\delta$  158.5, 142.0, 141.5, 133.4, 130.6, 130.3, 130.2, 127.8, 127.7, 127.7, 126.2, 124.1, 113.3, 55.2, 41.9.

HRMS-APCI calculated for  $\text{C}_{20}\text{H}_{19}\text{O}$   $[\text{M}+\text{H}]^+$ : 275.1436; found: 275.1442

### 4'-Chloro-2-(cyclohepta-2,4,6-trien-1-yl)-1,1'-biphenyl (17e)

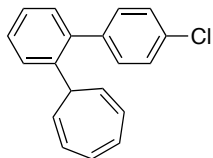

This compound was prepared as a white solid in 74% yield according to the general procedure A.

m.p. 114-115 °C

$^1\text{H}$  NMR (400 MHz,  $\text{CDCl}_3$ )  $\delta$  7.67 (dd,  $J = 7.9, 1.3$  Hz, 1H), 7.49 (td,  $J = 7.6, 1.5$  Hz, 1H), 7.36 (td,  $J = 7.5, 1.3$  Hz, 1H), 7.31 - 7.25 (m, 3H), 7.18 (d,  $J = 8.4$  Hz, 2H), 6.63 (t,  $J = 3.2$  Hz, 2H), 6.24 - 6.18 (m, 2H), 5.38 (dd,  $J = 9.0, 5.3$  Hz, 2H), 2.83 (tt,  $J = 5.3, 1.5$  Hz, 1H).  $^{13}\text{C}$  NMR (101 MHz,  $\text{CDCl}_3$ )  $\delta$  141.8, 140.6, 139.4, 132.9, 130.6, 130.5, 130.0, 128.3, 128.0, 127.8, 127.2, 126.4, 124.2, 41.9.

HRMS-APCI calculated for  $\text{C}_{19}\text{H}_{16}\text{Cl}$   $[\text{M}+\text{H}]^+$ : 279.0941; found: 279.0942

### 3'-Chloro-2-(cyclohepta-2,4,6-trien-1-yl)-1,1'-biphenyl (17f)

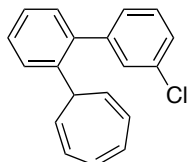

This compound was prepared as a white solid in 71% yield according to the general procedure A.

m.p. 89-90 °C

$^1\text{H}$  NMR (400 MHz,  $\text{CDCl}_3$ )  $\delta$  7.68 (dd,  $J = 7.8, 1.3$  Hz, 1H), 7.50 (td,  $J = 7.5, 1.6$  Hz, 1H), 7.36 (td,  $J = 7.5, 1.3$  Hz, 1H), 7.31 - 7.24 (m, 4H), 7.12 (dt,  $J = 6.8, 1.7$  Hz, 1H), 6.63 (t,  $J = 3.2$  Hz, 2H), 6.24 - 6.20 (m, 2H), 5.39 (dd,  $J = 9.1, 5.3$  Hz, 2H), 2.81 (tt,  $J = 5.4, 1.5$  Hz, 1H).  $^{13}\text{C}$  NMR (101 MHz,  $\text{CDCl}_3$ )  $\delta$  142.7, 141.8, 140.5, 133.7, 130.6, 129.9, 129.3, 129.0, 128.4, 127.8, 127.4, 127.1, 126.9, 126.4, 124.2, 41.9.

HRMS-APCI calculated for  $\text{C}_{19}\text{H}_{16}\text{Cl}$   $[\text{M}+\text{H}]^+$ : 279.0941; found: 279.0941

### 2-Bromo-2'-(cyclohepta-2,4,6-trien-1-yl)-1,1'-biphenyl (17g)

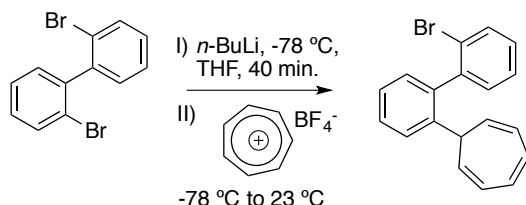

A solution of 2,2'-dibromobiphenyl (1.258 g, 4 mmol) in THF (16 mL) in a dried 50 mL round-bottom flask was cooled to  $-78$  °C and a  $n\text{-BuLi}$  solution (2.5 M in hexanes, 1.68 mL, 4.2 mmol) was added. After stirring for 40 minutes, tropylium tetrafluoroborate (1.424 g, 8 mmol) was added and the cooling bath was removed. When the reaction reached ambient temperature ( $23$  °C), cyclohexane (30 mL) was added and the mixture was loaded directly onto a column of  $\text{SiO}_2$  and purified by flash chromatography (cyclohexane as eluent), yielding the desired cycloheptatriene (958 mg, 2.9 mmol, 74%) as a colorless oil.

$^1\text{H}$  NMR (300 MHz,  $\text{CDCl}_3$ )  $\delta$  7.65 (dd,  $J = 7.8, 1.3$  Hz, 1H), 7.61 - 7.54 (m, 1H), 7.50 (td,  $J = 7.6, 1.5$  Hz, 1H), 7.34 (td,  $J = 7.5, 1.3$  Hz, 1H), 7.30 - 7.10 (m, 4H), 6.61 - 6.45 (m, 2H), 6.22 - 6.05 (m, 2H), 5.45 (dd,  $J = 9.4, 5.4$  Hz, 1H), 5.23 (dd,  $J = 9.3, 5.4$  Hz, 1H), 2.56 (tt,  $J = 5.5, 1.5$  Hz, 1H).  $^{13}\text{C}$  NMR (75 MHz,  $\text{CDCl}_3$ )  $\delta$  183.31, 132.48, 131.27, 130.86, 130.32, 129.98, 128.89, 128.79, 127.43, 127.15, 126.94, 126.42, 126.25, 124.54, 124.30, 42.24.

HRMS-APCI calcd for  $\text{C}_{19}\text{H}_{16}\text{Br}$  ( $\text{M}+\text{H}$ ) $^+$ : 323.0430; found: 323.0427.

### 2-(Cyclohepta-2,4,6-trien-1-yl)-2'-methyl-1,1'-biphenyl (17h)

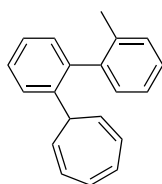

This compound was prepared as a colorless solid in 79% yield according to the general procedure A.

m.p.  $58\text{-}60$  °C

$^1\text{H}$  NMR (400 MHz,  $\text{CDCl}_3$ )  $\delta$  7.65 (dd,  $J = 7.9, 1.3$  Hz, 1H), 7.48 (td,  $J = 7.6, 1.5$  Hz, 1H), 7.34 (td,  $J = 7.5, 1.4$  Hz, 1H), 7.24 - 7.11 (m, 4H), 7.05 (dd,  $J = 7.3, 1.4$  Hz, 1H), 6.55 - 6.52 (m, 2H), 6.19 - 6.09 (m, 2H), 5.39 (dd,  $J = 9.4, 5.4$  Hz, 1H), 5.26 (dd,  $J = 9.3, 5.3$  Hz, 1H), 2.58 (tt,  $J = 5.4, 1.6$  Hz, 1H), 2.03 (s, 2H).  $^{13}\text{C}$  NMR (101 MHz,  $\text{CDCl}_3$ )  $\delta$  142.4, 141.2, 140.5, 135.9, 130.5, 130.3, 129.6, 129.5, 129.5, 127.9, 127.3, 127.1, 127.0, 126.9, 126.1, 125.2, 124.5, 124.1, 41.9, 20.2.

HRMS-APCI calculated for  $\text{C}_{20}\text{H}_{19}$   $[\text{M}+\text{H}]^+$ : 259.1487; found: 259.1488

### 1-(2-(Cyclohepta-2,4,6-trien-1-yl)phenyl)naphthalene (17i)

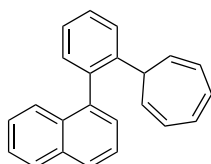

*n*-BuLi (1.6 M in hexanes, 0.23 mL, 0.37 mmol) was added dropwise to the solution of 1-(2-bromophenyl)naphthalene (100 mg, 0.23 mmol) in dry THF (1.4 mL, 0.25 M) at -78 °C under argon. The mixture was stirred for 30 min at -78 °C, and then tropylium tetrafluoroborate (75 mg, 0.42 mmol) was added in one portion. The cooling bath was removed and the reaction was stirred at room temperature (23 °C) overnight (12 h). The reaction was quenched by addition of water. The aqueous phase was extracted with ether, the combined organic extracts were dried over MgSO<sub>4</sub>, and the solvent was evaporated. The crude reaction mixture was purified by preparative TLC (eluent: pentane) to yield the title compound as a colorless oil that solidified upon standing (67 mg, 64%).

m.p. 80-81 °C

<sup>1</sup>H NMR (500 MHz, CDCl<sub>3</sub>) δ 7.83 (d, *J* = 8.1 Hz, 1H), 7.79 (d, *J* = 8.2 Hz, 1H), 7.72 (dd, *J* = 7.8, 1.3 Hz, 1H), 7.54 (td, *J* = 7.6, 1.5 Hz, 1H), 7.49 (d, *J* = 8.4 Hz, 1H), 7.45 – 7.32 (m, 4H), 7.27 (ddd, *J* = 9.6, 7.3, 1.1 Hz, 2H), 6.39 (dd, *J* = 11.0, 5.6 Hz, 1H), 6.31 (dd, *J* = 11.0, 5.7 Hz, 1H), 6.08 (dd, *J* = 9.3, 5.7 Hz, 1H), 5.97 (dd, *J* = 9.3, 5.7 Hz, 1H), 5.37 (dd, *J* = 9.3, 5.4 Hz, 1H), 5.28 (dd, *J* = 9.3, 5.4 Hz, 1H), 2.54 (t, *J* = 5.4 Hz, 1H). <sup>13</sup>C NMR (126 MHz, CDCl<sub>3</sub>) δ 143.4, 140.0, 138.7, 133.5, 132.4, 131.0, 130.6, 130.3, 128.4, 128.1, 127.7, 127.6, 127.2, 127.2, 127.0, 126.5, 126.2, 125.8, 125.7, 125.1, 124.5, 124.1, 42.3.

HRMS-MALDI: calculated for C<sub>23</sub>H<sub>17</sub> [M-H]<sup>+</sup>: 293.1330; found: 293.1361

### 2-(Cyclohepta-2,4,6-trien-1-yl)-1,1'-binaphthalene (17j).

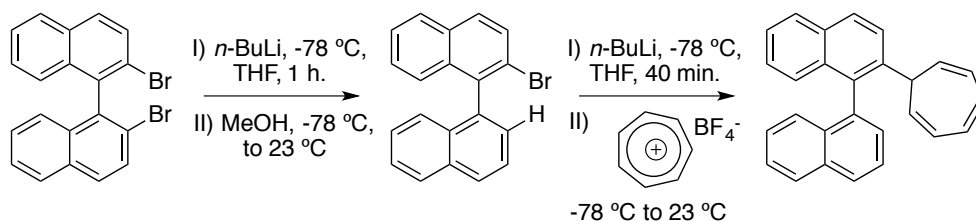

Following a literature procedure, a solution of 2,2'-dibromo-1,1'-binaphthyl (412 mg, 1 mmol) in THF (10 mL) in a dried 25 mL round-bottom flask was cooled to -78 °C and a *n*-BuLi solution (2.5 M in hexanes, 0.4 mL, 1 mmol) was added. After stirring for 1 hour, methanol (5 mL) was added and 10 minutes later the reaction was allowed to warm to room temperature (23 °C). The solution was concentrated on a rotary evaporator and then purified by flash chromatography (cyclohexane) to yield 2-bromo-1,1'-binaphthyl (312 mg, 0.94 mmol, 94%) as a colorless solid. The spectroscopic data matched with those reported in the literature.<sup>11</sup>

A 10 mL round-bottom flask with a solution of 2-bromo-1,1'-binaphthyl (288 mg, 0.87 mmol) in THF (3.5 mL) was cooled to -78 °C and *n*-BuLi solution (2.5 M in hexanes, 0.381 mL, 1.1 equiv.) was added. After stirring for 40 minutes, tropylium tetrafluoroborate (308 mg, 1.73 mmol, 2 equiv.) was added and the solution was

(11) Nagaki, A.; Takabayashi, N.; Tomida, Y. and Yoshida, J. *Org. Lett.* **2008**, *10*, 3937–3940.

allowed to warm to room temperature. The reaction was quenched with water, extracted with diethyl ether and washed with two portions of water and brine. After drying and concentrating, the mixture was purified by flash chromatography (cyclohexane) to yield the target compound (186 mg, 0.54 mmol, 62%) as a viscous pale-yellow oil.

$^1\text{H}$  NMR (300 MHz,  $\text{CDCl}_3$ )  $\delta$  8.06 (d,  $J = 8.6$  Hz, 1H), 7.93 (d,  $J = 8.2$  Hz, 1H), 7.86 (t,  $J = 7.9$  Hz, 3H), 7.53 - 7.38 (m, 3H), 7.31 (d,  $J = 6.9$  Hz, 1H), 7.26 - 7.19 (m, 3H), 7.08 (d,  $J = 8.5$  Hz, 1H), 6.40 (d,  $J = 16.3$  Hz, 1H), 6.30 (d,  $J = 16.3$  Hz, 1H), 6.10 (dd,  $J = 9.3, 5.5$  Hz, 1H), 5.96 (dd,  $J = 9.2, 5.5$  Hz, 1H), 5.38 (d,  $J = 28.5$  Hz, 2H), 2.58 (t,  $J = 5.1$  Hz, 1H).  $^{13}\text{C}$  NMR (75 MHz,  $\text{CDCl}_3$ )  $\delta$  140.51, 136.29, 133.46, 133.35, 133.04, 132.34, 130.67, 130.33, 128.89, 128.15, 128.09, 127.93, 127.88, 127.16, 127.00, 126.46, 126.29, 126.00, 125.87, 125.55, 125.52, 125.36, 124.58, 124.27, 42.94.

HRMS-APCI calcd for  $\text{C}_{27}\text{H}_{21}\text{Br}$  ( $M+\text{H}$ ) $^+$ : 345.1638; found: 345.1646.

### 2,2''-Di(cyclohepta-2,4,6-trien-1-yl)-1,1':4',1''-terphenyl (17k)

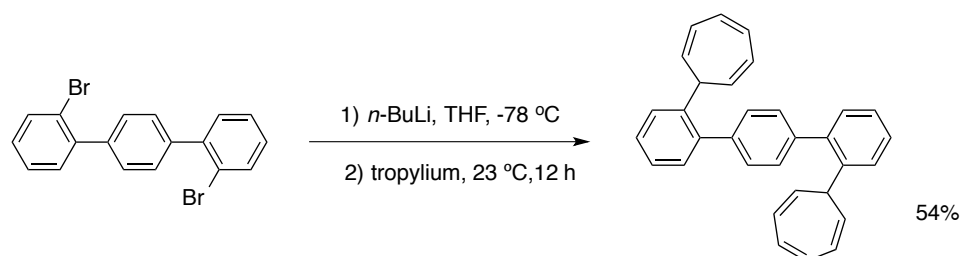

The title compound was prepared according to general procedure **A-2** from the known compound 2,2''-dibromo-1,1':4',1''-terphenyl<sup>12</sup> as a colorless solid in 54% yield.

m.p. 182-184 °C

$^1\text{H}$  NMR (500 MHz,  $\text{CDCl}_3$ )  $\delta$  7.67 (d,  $J = 8.0$  Hz, 2H), 7.47 (ddd,  $J = 7.8, 7.0, 1.8$  Hz, 2H), 7.39 - 7.31 (m, 4H), 7.19 (s, 4H), 6.61 (dd,  $J = 3.8, 2.7$  Hz, 4H), 6.23 - 6.18 (m, 4H), 5.39 (ddd,  $J = 9.5, 5.3, 0.8$  Hz, 4H), 2.94 (ddd,  $J = 5.4, 3.8, 1.5$  Hz, 2H).  $^{13}\text{C}$  NMR (126 MHz,  $\text{CDCl}_3$ )  $\delta$  141.8, 141.5, 139.4, 130.6, 130.2, 128.8, 127.9, 127.8, 127.5, 126.3, 124.1, 41.8.

HRMS-APCI calculated for  $\text{C}_{32}\text{H}_{27}$  [ $M+\text{H}$ ] $^+$ : 411.2113; found: 411.2113

### 2,6-Di(cyclohepta-2,4,6-trien-1-yl)-1,1'-biphenyl (17l)

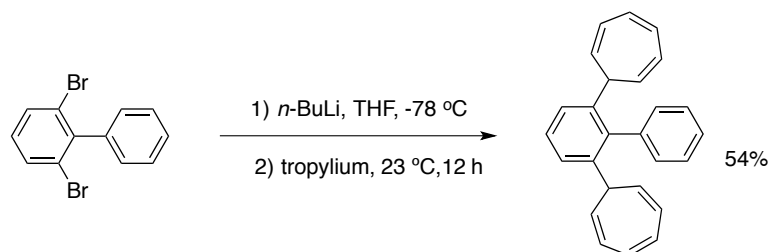

$n\text{-BuLi}$  (1.6 M in hexanes, 2.2 mL, 3.53 mmol) was added dropwise to the solution of 550 mg (1.76 mmol) 2,6-dibromo-1,1'-biphenyl<sup>13</sup> in 20 mL THF at -78 °C under

(12) Velian, A.; Lin, S.; Miller, A. J. M.; Day, M. W.; Agapie, T. *J. Am. Chem. Soc.* **2010**, *132*, 6296–6297.

(13) Machuy, M. M.; Würtele, C.; Schreiner, P. R. *Synthesis* **2012**, *44*, 1405–1409.

argon. After addition, the mixture was warmed to room temperature (23 °C) slowly and allowed to stir for 1 h. After cooling down to -78 °C again, tropylium tetrafluoroborate (628mg, 3.53mmol) was added in one portion. The cooling bath was removed and the reaction was stirred at room temperature overnight (12 h). The reaction was quenched by addition of water. The aqueous phase was extracted with ether, the combined organic extracts were dried over MgSO<sub>4</sub>, and the solvent was evaporated. The crude reaction mixture was purified by chromatography to yield 320 mg of the title compound as a colorless crystalline solid (54%).

m.p. 137-138 °C

<sup>1</sup>H NMR (500 MHz, CDCl<sub>3</sub>) δ 7.62 - 7.55 (m, 3H), 7.18 - 7.16 (m, 3H), 7.02 - 6.97 (m, 2H), 6.49 (dd, *J* = 3.8, 2.7 Hz, 4H), 6.14 - 6.11 (m, 4H), 5.35 (dd, *J* = 8.7, 5.4 Hz, 4H), 2.52 (tt, *J* = 5.4, 1.5 Hz, 2H). <sup>13</sup>C NMR (101 MHz, CDCl<sub>3</sub>) δ 142.7, 141.5, 138.4, 130.3, 129.4, 128.4, 127.5, 127.3, 126.6, 125.3, 123.9, 42.6.

HRMS-MALDI: calculated for C<sub>26</sub>H<sub>22</sub> [M]<sup>+</sup>: 334.1722; found: 334.1711

### 7-(2-Phenoxyphenyl)cyclohepta-1,3,5-triene (22a)

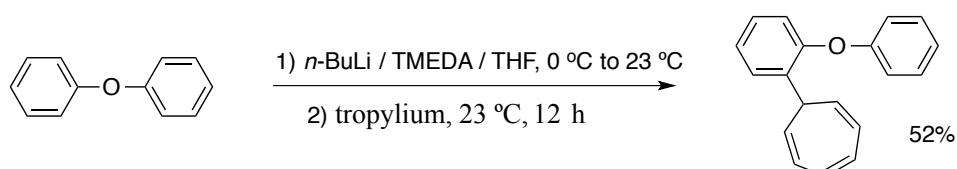

*n*-BuLi (1.6 M in hexanes, 15 mL, 24 mmol) was added dropwise to the solution of diphenyl ether (3.4 g, 20 mmol) and tetramethylethylenediamine (2.79 g, 3.58 mL, 24 mmol) in 50 mL THF at 0 °C. After stirring at room temperature (23 °C) for 5 h, tropylium tetrafluoroborate (3.56 g, 20 mmol) was added, and stirred at room temperature overnight. The reaction was quenched by addition of water. The aqueous phase was extracted with ether, the combined organic extracts were dried over MgSO<sub>4</sub>, and the solvent was evaporated. The crude reaction mixture was purified by column chromatography on silica gel with cyclohexane as eluent to give 2.7 g colorless oil in 52% yield.

<sup>1</sup>H NMR (500 MHz, CDCl<sub>3</sub>) δ 7.50 (dd, *J* = 7.6, 1.7 Hz, 1H), 7.34 - 7.24 (m, 3H), 7.19 (td, *J* = 7.5, 1.3 Hz, 1H), 7.10 - 7.05 (m, 1H), 6.97 - 6.93 (m, 3H), 6.68 (dd, *J* = 3.6, 2.7 Hz, 2H), 6.22 - 6.25 (m, 2H), 5.46 (dd, *J* = 8.8, 5.6 Hz, 2H), 3.18 (tt, *J* = 5.6, 1.4 Hz, 1H). <sup>13</sup>C NMR (126 MHz, CDCl<sub>3</sub>) δ 157.69, 154.74, 134.84, 130.78, 129.61, 129.34, 127.88, 126.28, 124.45, 123.94, 122.78, 119.52, 118.30, 40.18.

HRMS-MALDI: calculated for C<sub>19</sub>H<sub>15</sub>O [M-H]<sup>+</sup>: 259.1117; found: 259.1111

### 7-(2-(Benzyloxy)phenyl)cyclohepta-1,3,5-triene (22b)

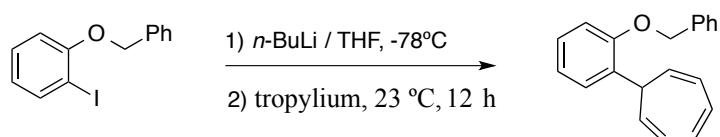

*n*-BuLi (2.0 M in hexanes, 5.5 mL, 11 mmol) was added dropwise to the solution of 1-(benzyloxy)-2-iodobenzene<sup>14</sup> (3.1 g, 10 mmol) in 40 mL THF at -78 °C. After stirring for 0.5 h, tropylium tetrafluoroborate (2.0 g, 11 mmol) was added, and stirred

(14) 1-(Benzyloxy)-2-iodobenzene was prepared according to the reported procedure: Cakir, S. P.; Stokes, S.; Sygula, A.; Mead, K. T. *J. Org. Chem.* **2009**, *74*, 7529–7532.

at room temperature overnight (12 h). The reaction was quenched by addition of water. The aqueous phase was extracted with ether, the combined organic extracts were dried over  $\text{MgSO}_4$ , and the solvent was evaporated. The crude reaction mixture was purified by column chromatography on silica gel to give 1.7 g colorless oil in 62% yield.

$^1\text{H}$  NMR (400 MHz,  $\text{CDCl}_3$ )  $\delta$  7.43 - 7.25 (m, 7H), 7.06 - 6.99 (m, 2H), 6.75 (dd,  $J = 3.7, 2.6$  Hz, 2H), 6.27 (dddd,  $J = 8.9, 3.9, 2.6, 1.4$  Hz, 2H), 5.52 (dd,  $J = 8.7, 5.6$  Hz, 2H), 5.14 (s, 2H), 3.31 - 3.21 (m, 1H).  $^{13}\text{C}$  NMR (101 MHz,  $\text{CDCl}_3$ )  $\delta$  156.44, 137.32, 132.17, 130.79, 128.87, 128.44, 127.76, 127.57, 127.02, 126.75, 124.21, 121.13, 112.62, 70.04, 40.62.

HRMS-APCI calculated for  $\text{C}_{20}\text{H}_{19}\text{O}$   $[\text{M}+\text{H}]^+$ : 275.1430; found: 275.1428

### 3. General Procedure B for the Gold-Catalyzed Formation of Indenes and Fluorenes.

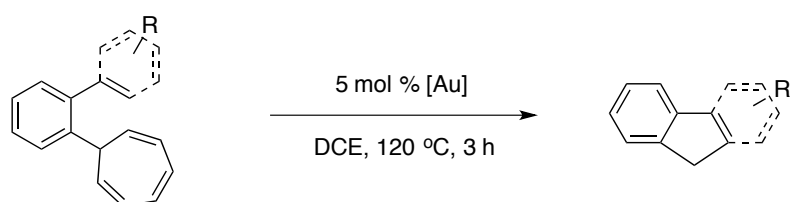

A solution of the *o*-arylcycloheptatriene substrate (0.1 mmol) and gold complex (5 mol %) in 1,2-dichloroethane (DCE, 1 mL) was heated at 120 °C in a sealed tube until the starting material had been fully consumed (2-3 h). The reaction was performed under an air atmosphere with no special precautions taken to exclude water. After the reaction mixture had been allowed to cool to room temperature, the solvent was removed in vacuo, and the crude residue was purified by preparative TLC.

#### Experimental Details on the Synthesis of Indenes.

##### 2-Phenyl-1*H*-indene (8a)

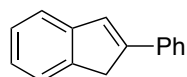

This compound was prepared as a colorless solid in 74% yield from **7a** according to the general procedure B.

The spectroscopic data match with those reported in the literature.<sup>15</sup>

$^1\text{H}$  NMR (400 MHz,  $\text{CDCl}_3$ )  $\delta$  7.68 (d,  $J = 7.1$  Hz, 2H), 7.52 (d,  $J = 7.4$  Hz, 1H), 7.46 - 7.40 (m, 3H), 7.34 - 7.26 (m, 3H), 7.23 (td,  $J = 7.4, 1.2$  Hz, 1H), 3.83 (s, 2H).  $^{13}\text{C}$  NMR (101 MHz,  $\text{CDCl}_3$ )  $\delta$  146.4, 145.3, 143.1, 136.0, 128.7, 127.5, 126.6, 126.5, 125.6, 124.7, 123.6, 121.0, 39.0.

##### 2-(4-Chlorophenyl)-1*H*-indene (8b)

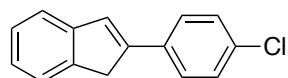

This compound was prepared as a colorless solid in 65% yield from **7b** according to the general procedure B.

(15) Deng, R.; Sun, L.; Li, Z. *Org. Lett.* **2007**, *9*, 5207–5210.

The spectroscopic data match with those reported in the literature.<sup>16</sup>

<sup>1</sup>H NMR (400 MHz, CDCl<sub>3</sub>) δ 7.58 (d, *J* = 8.6 Hz, 2H), 7.50 (d, *J* = 7.2 Hz, 1H), 7.43 (d, *J* = 7.6 Hz, 1H), 7.37 (d, *J* = 8.5 Hz, 2H), 7.31 (td, *J* = 7.5, 1.1 Hz, 1H), 7.26 - 7.18 (m, 2H), 3.79 (s, 2H). <sup>13</sup>C NMR (101 MHz, CDCl<sub>3</sub>) δ 145.1, 145.0, 143.0, 134.5, 133.1, 128.8, 127.1, 126.8, 126.7, 125.0, 123.7, 121.1, 38.9.

### 2-(*p*-Tolyl)-1*H*-indene (8c)

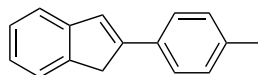

This compound was prepared as a colorless solid in 74% yield from **7c** according to the general procedure B.

The spectroscopic data match with those reported in the literature.<sup>17</sup>

<sup>1</sup>H NMR (400 MHz, CDCl<sub>3</sub>) δ 7.57 (d, *J* = 8.1 Hz, 2H), 7.50 (d, *J* = 7.3 Hz, 1H), 7.42 (d, *J* = 7.6 Hz, 1H), 7.32 (dd, *J* = 7.6, 1.1 Hz, 1H), 7.25 - 7.18 (m, 4H), 3.81 (s, 2H), 2.41 (s, 3H). <sup>13</sup>C NMR (101 MHz, CDCl<sub>3</sub>) δ 146.5, 145.5, 143.0, 137.4, 133.2, 129.3, 126.5, 125.6, 125.5, 124.5, 123.6, 120.8, 39.0, 21.2.

### 2-(*m*-Tolyl)-1*H*-indene (8d)

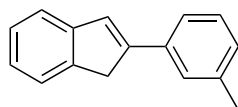

This compound was prepared as a colorless solid in 78% yield from **7d** according to the general procedure B.

The spectroscopic data match with those reported in the literature.<sup>16</sup>

<sup>1</sup>H NMR (400 MHz, CDCl<sub>3</sub>) δ 7.53 - 7.47 (m, 3H), 7.44 (d, *J* = 7.1 Hz, 1H), 7.32 (t, *J* = 7.5 Hz, 2H), 7.26 (s, 1H), 7.22 (td, *J* = 7.4, 1.2 Hz, 1H), 7.14 (d, *J* = 7.2 Hz, 1H), 3.83 (s, 2H), 2.44 (s, 3H). <sup>13</sup>C NMR (101 MHz, CDCl<sub>3</sub>) δ 146.6, 145.4, 143.1, 138.2, 135.9, 128.6, 128.3, 126.6, 126.4, 124.6, 123.6, 122.8, 120.9, 39.0, 21.5.

### 2-Mesityl-1*H*-indene (8e)

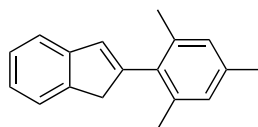

This compound was prepared as a colorless solid in 83% yield from **7e** according to the general procedure B.

The spectroscopic data match with those reported in the literature.<sup>18</sup>

---

(16) Greifenstein, L. G.; Lambert, J. B.; Nienhuis, R. J.; Fried, H. E.; Pagani, G. A. *J. Org. Chem.* **1981**, *46*, 5125–5132.

(17) Jayamani, M.; Pant, N.; Ananthan, S.; Narayanan, K.; Pillai, C. N. *Tetrahedron* **1986**, *42*, 4325–4332.

(18) Lebedev, A. Y.; Izmer, V. V.; Asachenko, A. F.; Tzarev, A. A.; Uborsky, D. V.; Homutova, Y. A.; Shperber, E. R.; Canich, J. A. M.; Voskoboynikov, A. Z. *Organometallics* **2009**, *28*, 1800–1816.

$^1\text{H}$  NMR (400 MHz,  $\text{CDCl}_3$ )  $\delta$  7.53 (d,  $J = 7.3$  Hz, 1H), 7.46 (d,  $J = 7.3$  Hz, 1H), 7.35 (td,  $J = 7.4, 1.0$  Hz, 1H), 7.25 (td,  $J = 7.5, 1.2$  Hz, 1H), 6.98 (s, 2H), 6.69 (s, 1H), 3.60 (s, 2H), 2.37 (s, 3H), 2.22 (s, 6H).  $^{13}\text{C}$  NMR (101 MHz,  $\text{CDCl}_3$ )  $\delta$  147.6, 145.4, 143.5, 136.7, 136.2, 134.7, 130.2, 128.0, 126.4, 124.2, 123.5, 120.7, 42.1, 21.0, 20.5.

### 2-Benzyl-1H-indene (8f)

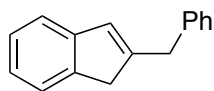

This compound was prepared as a colorless solid in 78% yield from **7f** according to the general procedure B.

The spectroscopic data match with those reported in the literature.<sup>19</sup>

$^1\text{H}$  NMR (400 MHz,  $\text{CDCl}_3$ )  $\delta$  7.39 - 7.22 (m, 8H), 7.13 (td,  $J = 7.4, 1.3$  Hz, 1H), 6.55 (s, 1H), 3.85 (s, 2H), 3.32 (s, 2H).  $^{13}\text{C}$  NMR (101 MHz,  $\text{CDCl}_3$ )  $\delta$  149.2, 145.3, 143.4, 140.0, 128.8, 128.4, 127.8, 126.2, 126.2, 123.8, 123.4, 120.2, 40.8, 37.9.

### (E)-2-Styryl-1H-indene (8g)

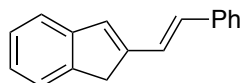

This compound was prepared as a colorless solid in 42% yield from **7g** according to the general procedure B.

The spectroscopic data match with those reported in the literature.<sup>20</sup>

$^1\text{H}$  NMR (500 MHz,  $\text{CDCl}_3$ )  $\delta$  7.51 (d,  $J = 7.2$  Hz, 2H), 7.46 (d,  $J = 7.4$  Hz, 1H), 7.40 - 7.35 (m, 3H), 7.31 - 7.19 (m, 4H), 6.88 (s, 1H), 6.81 (d,  $J = 16.2$  Hz, 1H), 3.70 (s, 2H).  $^{13}\text{C}$  NMR (126 MHz,  $\text{CDCl}_3$ )  $\delta$  146.3, 145.1, 142.8, 137.3, 131.3, 129.4, 128.7, 127.5, 126.6, 126.3, 125.0, 124.9, 123.6, 120.9, 37.4.

### 2-Hexyl-1H-indene (8h)

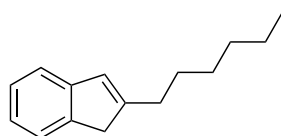

This compound was prepared as a colorless solid in 89% yield from **7h** according to the general procedure B.

The spectroscopic data match with those reported in the literature.<sup>21</sup>

$^1\text{H}$  NMR (400 MHz,  $\text{CDCl}_3$ )  $\delta$  7.41 (d,  $J = 7.3$  Hz, 1H), 7.31 - 7.22 (m, 2H), 7.13 (td,  $J = 7.3, 1.3$  Hz, 1H), 6.53 (s, 1H), 3.34 (s, 2H), 2.51 (t,  $J = 7.6$  Hz, 2H), 1.71 - 1.59 (m, 2H), 1.43 - 1.29 (m, 6H), 0.92 (t,  $J = 7.6$  Hz, 3H).  $^{13}\text{C}$  NMR (101 MHz,  $\text{CDCl}_3$ )  $\delta$  151.0, 145.7, 143.1, 126.2, 126.0, 123.4, 123.3, 119.8, 41.0, 31.7, 31.2, 29.1, 29.0, 22.6, 14.1.

### 2-(4-Methylpent-3-en-1-yl)-1H-indene (8i)

(19) Martinez, A.; Fernandez, M.; Estevez, J. C.; Estevez, R. J.; Castedo, L. *Tetrahedron* **2005**, *61*, 485–492.

(20) Deng, R.; Sun, L.; Li, Z. *Org. Lett.* **2007**, *9*, 5207–5210.

(21) Lee, D.-H.; Kwon, K.-H.; Yi, C. S. *Science* **2011**, *333*, 1613–1616.



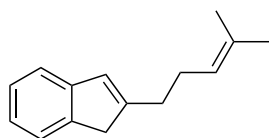

This compound was prepared as a colorless oil in 69% yield from **7i** according to the general procedure B.

$^1\text{H}$  NMR (500 MHz,  $\text{CDCl}_3$ )  $\delta$  7.41 (d,  $J = 7.3$  Hz, 1H), 7.30 (d,  $J = 7.4$  Hz, 1H), 7.25 (t,  $J = 7.4$  Hz, 1H), 7.13 (td,  $J = 7.3, 1.3$  Hz, 1H), 6.55 (s, 1H), 5.21 (t,  $J = 7.0$  Hz, 1H), 3.34 (d,  $J = 1.3$  Hz, 2H), 2.58 - 2.51 (m, 2H), 2.33 (q,  $J = 7.4$  Hz, 2H), 1.73 (d,  $J = 1.3$  Hz, 3H), 1.66 (s, 3H).  $^{13}\text{C}$  NMR (126 MHz,  $\text{CDCl}_3$ )  $\delta$  150.6, 145.7, 143.1, 132.0, 126.2, 126.2, 123.9, 123.5, 123.3, 119.8, 41.1, 31.4, 27.6, 25.7, 17.7.

HRMS-EI calculated for  $\text{C}_{15}\text{H}_{18}$   $[\text{M}]^+$ : 198.1409; found: 198.1405

### 2-(2,6-Dimethylhept-5-en-1-yl)-1H-indene (**8j**)

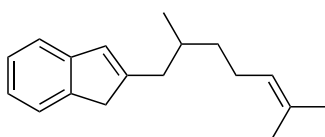

A 1 mL DCE solution of substrate **7j** (32 mg, 0.1 mmol) and gold catalyst **E** (4 mg, 5 mol %) was heated at 120 °C overnight. After cooling to room temperature, the solvent was removed in vacuo. The residue was purified with preparative TLC to give **8j** as a colorless oil (19.2mg, 80%).

$^1\text{H}$  NMR (400 MHz,  $\text{CDCl}_3$ )  $\delta$  7.41 (d,  $J = 7.6$  Hz, 1H), 7.30 (d,  $J = 7.3$  Hz, 1H), 7.25 (t,  $J = 7.1$  Hz, 1H), 7.13 (td,  $J = 7.3, 1.3$  Hz, 1H), 6.54 (d,  $J = 1.1$  Hz, 1H), 5.19 - 5.09 (m, 1H), 3.34 (d,  $J = 22.9$  Hz, 1H), 3.32 (d,  $J = 22.7$  Hz, 1H), 2.52 (ddd,  $J = 14.2, 6.1, 1.4$  Hz, 1H), 2.33 (ddd,  $J = 14.0, 8.0, 1.2$  Hz, 1H), 2.15 - 1.98 (m, 2H), 1.82 - 1.76 (m, 1H), 1.73 (s, 3H), 1.65 (s, 3H), 1.48 - 1.43 (m, 1H), 1.28 - 1.19 (m, 1H), 0.96 (d,  $J = 6.6$  Hz, 3H).  $^{13}\text{C}$  NMR (101 MHz,  $\text{CDCl}_3$ )  $\delta$  149.75, 145.72, 143.28, 131.27, 127.51, 126.21, 124.72, 123.50, 123.36, 119.83, 41.25, 39.06, 37.04, 32.67, 25.74, 25.64, 19.79, 17.69.

HRMS-APCI calculated for  $\text{C}_{18}\text{H}_{25}$   $[\text{M}+\text{H}]^+$ : 241.1951; found: 241.1953

### 2-((1*R*\*,2*S*\*,3*R*\*)-2,3-diphenylcyclopropyl)-1H-indene (**8k**)

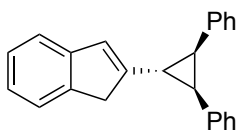

This compound was prepared according to the general procedure B. The 1 mL DCE solution of substrate **7k** (39 mg, 0.1 mmol) and gold catalyst A (3.7 mg, 5 mol %) was heated at 120 °C for 2 h. After cooling to room temperature, the solvent was removed in vacuo. The residue was purified with preparative TLC to give **8k** as a colorless solid (19.2 mg, 62%).

m.p. 129-131 °C

$^1\text{H}$  NMR (400 MHz,  $\text{CDCl}_3$ )  $\delta$  7.45 (d,  $J = 7.4$  Hz, 1H), 7.34 (d,  $J = 7.1$  Hz, 1H), 7.28 (t,  $J = 7.2$  Hz, 1H), 7.21 - 7.11 (m, 7H), 7.05 - 7.01 (m, 4H), 6.75 (s, 1H), 3.48 (s, 2H), 2.85 - 2.75 (m, 3H).  $^{13}\text{C}$  NMR (101 MHz,  $\text{CDCl}_3$ )  $\delta$  150.25, 145.39, 142.44,

137.48, 128.92, 127.89, 126.50, 126.01, 125.56, 123.82, 123.52, 119.99, 39.79, 34.27, 27.76.

HRMS-APCI calculated for  $C_{24}H_{21} [M+H]^+$ : 309.1638; found: 309.1637

### 1,4-Di(1*H*-inden-2-yl)benzene (**8l**)

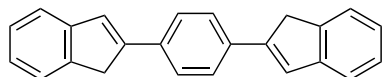

This compound was prepared from **7l** according to the general procedure B. A highly insoluble yellow solid was collected by filtration after cooling down to r.t. (in 41% yield). No further purification was necessary.

$^1H$  NMR (500 MHz, 1,1,2,2-tetrachloroethane- $d_2$ ; 398 K)  $\delta$  7.60 (s, 4H), 7.44 (d,  $J$  = 7.3 Hz, 2H), 7.37 (d,  $J$  = 7.5 Hz, 2H), 7.24 (t,  $J$  = 7.4 Hz, 2H), 7.19 (s, 2H), 7.15 (t,  $J$  = 7.3 Hz, 2H), 3.78 (s, 4H).  $^{13}C$  NMR (126 MHz, 1,1,2,2-tetrachloroethane- $d_2$ ; 398 K)  $\delta$   $^{13}C$  NMR (126 MHz, 1,1,2,2-tetrachloroethane- $d_2$ )  $\delta$  145.7, 144.8, 142.6, 134.9, 126.2, 126.1, 125.4, 124.3, 123.0, 120.4, 38.6. HRMS-MALDI calculated for  $C_{24}H_{18} [M]^+$ : 306.1403; found 306.1402

### 2,3,4,4a-Tetrahydro-1*H*-fluorene (**8m**)

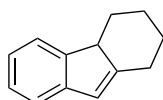

This compound was prepared as a colorless oil in 73% yield from **7m** according to the general procedure B.

$^1H$  NMR (500 MHz,  $CDCl_3$ )  $\delta$  7.38 (d,  $J$  = 7.3 Hz, 1H), 7.31 (d,  $J$  = 7.4 Hz, 1H), 7.24 (td,  $J$  = 7.5, 1.1 Hz, 1H), 7.13 (td,  $J$  = 7.5, 1.3 Hz, 1H), 6.40 (s, 1H), 3.08 (dd,  $J$  = 12.5, 6.1 Hz, 1H), 2.82 - 2.76 (m, 1H), 2.59 - 2.54 (m, 1H), 2.42 - 2.34 (m, 1H), 2.07 - 2.00 (m, 1H), 1.92 - 1.88 (m, 1H), 1.65 - 1.58 (m, 1H), 1.29 - 1.21 (m, 1H), 0.94 (qd,  $J$  = 12.8, 3.5 Hz, 1H).  $^{13}C$  NMR (126 MHz,  $CDCl_3$ )  $\delta$  153.6, 147.7, 144.8, 126.3, 123.4, 122.3, 121.7, 120.0, 50.0, 32.4, 29.2, 28.0, 25.4.

HRMS-APCI calculated for  $C_{13}H_{15} [M+H]^+$ : 171.1174; found: 171.1169

### 4b,5-Dihydroindeno[2,1-*a*]indene (**8n**)

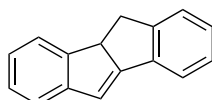

This compound was prepared from **7n** according to the general procedure B as a colorless solid in 31% yield.

m.p. 103-105 °C

$^1H$  NMR (400 MHz,  $CDCl_3$ )  $\delta$  7.57 (dd,  $J$  = 7.5, 0.6 Hz, 1H), 7.48 (d,  $J$  = 7.4 Hz, 1H), 7.39 (d,  $J$  = 7.5 Hz, 1H), 7.34 (d,  $J$  = 7.3 Hz, 1H), 7.31 - 7.26 (m, 2H), 7.23 - 7.16 (m, 2H), 6.75 (d,  $J$  = 2.5 Hz, 1H), 4.45 (td,  $J$  = 8.5, 2.6 Hz, 1H), 3.45 (dd,  $J$  = 14.8, 8.6 Hz, 1H), 2.70 (dd,  $J$  = 14.7, 8.5 Hz, 1H).  $^{13}C$  NMR (101 MHz,  $CDCl_3$ )  $\delta$  158.8, 151.1, 149.2, 145.2, 136.9, 127.3, 127.0, 126.9, 125.7, 124.1, 123.5, 121.8, 121.7, 119.1, 58.5, 33.1.

HRMS-MALDI: calculated for  $C_{16}H_{12} [M]^+$ : 204.0939; found: 204.0957

### 5-Methyl-2-phenyl-1*H*-indene (**8p'**) and 6-methyl-2-phenyl-1*H*-indene (**8p**)

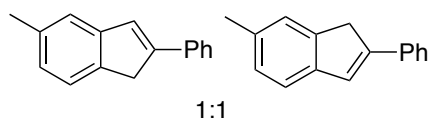

This mixture of compounds was prepared as a colorless solid in 81% yield (1:1 mixture) from **7p** according to the general procedure B.

m.p. 180-181 °C

Some proton signals arising of the two isomers could be differentiated (labeled as *isomer a* and *isomer b*); however, these could not be assigned definitively to **8p** or **8p'**. <sup>1</sup>H NMR (500 MHz, CDCl<sub>3</sub>) δ 7.69 - 7.66 (m, 2H), 7.45 - 7.23 (m, 6H), 7.16 - 7.13 (d, *J* = 7.9 Hz, 1H, *isomer a*), 7.06 (dd, *J* = 7.7, 1.5 Hz, 1H, *isomer b*), 3.80 (s, 2H), 2.46 (s, 3H, *isomer a*), 2.45 (s, 3H, *isomer b*). <sup>13</sup>C NMR (126 MHz, CDCl<sub>3</sub>, mixture of signals) δ 146.6, 145.6, 145.3, 143.5, 142.7, 140.2, 136.2, 136.1, 134.5, 128.6, 127.4, 127.3, 127.3, 126.5, 126.4, 125.6, 125.5, 124.6, 123.3, 121.7, 120.6, 38.8, 38.6, 21.5, 21.5.

HRMS-APCI calculated for C<sub>16</sub>H<sub>15</sub> [M+H]<sup>+</sup>: 207.1174; found: 207.1173

### 2-Hexyl-5-methyl-1*H*-indene (**8q'**) and 2-hexyl-6-methyl-1*H*-indene (**8q**)

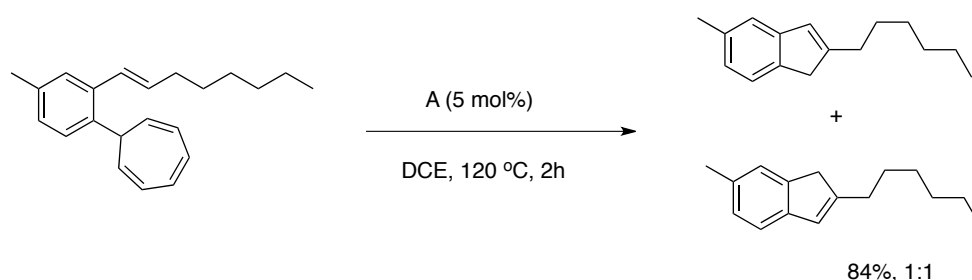

This mixture of compounds was prepared as a colorless oil in 84% yield (1:1 mixture) from **7q** according to the general procedure B.

<sup>1</sup>H NMR (400 MHz, CDCl<sub>3</sub>) δ 7.28 (d, *J* = 7.7 Hz, 1H), 7.23 (s, 1H), 7.18 (d, *J* = 7.6 Hz, 1H), 7.12 (s, 1H), 7.05 (d, *J* = 7.7 Hz, 1H), 6.95 (d, *J* = 7.7 Hz, 1H), 6.48 (m, 2H), 3.29 (s, 4H), 2.53 - 2.47 (m, 4H), 2.40 (s, 6H), 1.68 - 1.58 (m, 4H), 1.39 - 1.29 (m, 12H), 0.94 (t, *J* = 6.8 Hz, 6H). <sup>13</sup>C NMR (101 MHz, CDCl<sub>3</sub>) δ 151.33, 149.93, 146.02, 143.47, 143.09, 140.16, 135.73, 133.00, 126.83, 125.96, 125.79, 124.38, 124.23, 123.04, 120.61, 119.43, 40.84, 40.64, 31.77, 31.31, 31.25, 29.15, 29.05, 22.65, 21.46, 21.39, 14.12.

HRMS-APCI calculated for C<sub>16</sub>H<sub>23</sub> [M+H]<sup>+</sup>: 215.1794; found: 215.1801

### 5-Methoxy-2-phenyl-1*H*-indene (**8r'**) and 6-methoxy-2-phenyl-1*H*-indene (**8r**)

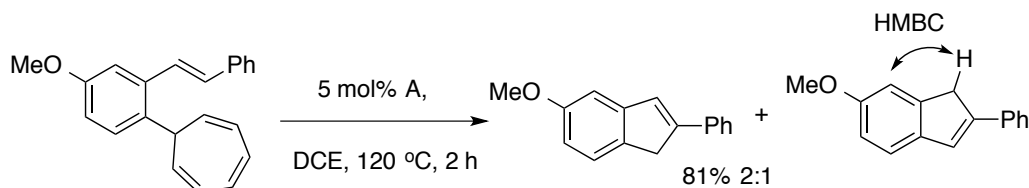

This mixture of compounds was prepared as a colorless solid in 81% yield (2:1 mixture, **8r'** as the major product) from **7r** according to the general procedure B. The

ratio of products was determined by integration of peaks in the  $^1\text{H}$  NMR spectrum. HMBC was used to elucidate which were the major and minor products.

$^1\text{H}$  NMR (400 MHz,  $\text{CDCl}_3$ )  $\delta$  7.67 - 7.61 (m, major2H+minor2H), 7.44 - 7.31 (m, major4H+minor4H), 7.20 (s, major1H+minor1H), 7.10 (d,  $J = 0.7$  Hz, minor1H), 6.99 (d,  $J = 2.4$  Hz, major1H), 6.87 (dd,  $J = 8.2, 2.4$  Hz, minor1H), 6.78 (dd,  $J = 8.1, 2.4$  Hz, major1H), 3.87 (s, major3H+minor3H), 3.79 (s, minor2H), 3.77 (s, major2H).  $^{13}\text{C}$  NMR (101 MHz,  $\text{CDCl}_3$ , mixed signals)  $\delta$  159.08, 158.01, 147.85, 146.70, 145.09, 144.25, 138.54, 136.21, 136.00, 135.34, 128.68, 128.65, 127.57, 127.09, 126.46, 126.06, 125.63, 125.32, 124.06, 121.29, 112.19, 110.82, 110.38, 106.50, 55.58, 55.51, 39.07, 38.26.

HRMS-APCI calculated for  $\text{C}_{16}\text{H}_{15}\text{O}$   $[\text{M}+\text{H}]^+$ : 223.1117; found: 223.1116

HMBC cross peak of **8r** ( $\delta(\text{H})$  3.79,  $\delta(\text{C})$  110.25)

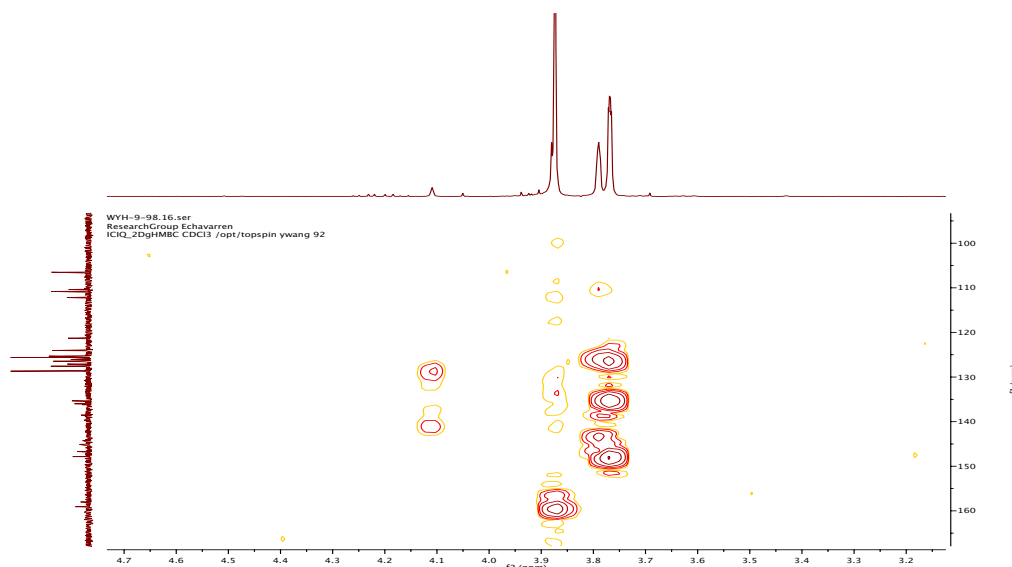

## 2-Phenyl-1H-indene- $d_1$ (**8a-d<sub>1</sub>**)

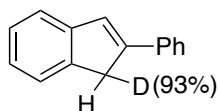

This compound was prepared as a colorless solid in 73% yield from **7a-d<sub>1</sub>** according to the general procedure B.

$^1\text{H}$  NMR (500 MHz,  $\text{CDCl}_3$ )  $\delta$  7.67 (d,  $J = 7.2$  Hz, 2H), 7.51 (d,  $J = 7.2$  Hz, 1H), 7.46 - 7.40 (m, 3H), 7.33 - 7.29 (m, 2H), 7.27 (d,  $J = 1.4$  Hz, 1H), 7.22 (td,  $J = 7.4, 1.1$  Hz, 1H), 3.81 (s, 1H and 7% residual signal).  $^{13}\text{C}$  NMR (126 MHz,  $\text{CDCl}_3$ )  $\delta$  146.4, 145.4, 143.1, 136.0, 128.6, 127.5, 126.6, 126.5, 125.6, 124.7, 123.6, 120.9, 38.7 (t,  $J_{\text{CD}} = 19.7$  Hz).

HRMS-APCI calculated for  $\text{C}_{15}\text{H}_{12}\text{D}$   $[\text{M}+\text{H}]^+$ : 194.1080; found: 194.1081

## 9H-Cyclohepta[a]naphthalene (**12**)

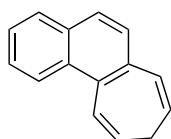

This compound was prepared as a colorless oil in 28% yield from *cis*-**7a** according to the general procedure B.

$^1\text{H}$  NMR (500 MHz,  $\text{CDCl}_3$ )  $\delta$  8.24 (d,  $J = 8.6$  Hz, 1H), 7.88 (dd,  $J = 7.9, 1.5$  Hz, 1H), 7.76 (d,  $J = 8.6$  Hz, 1H), 7.61 - 7.51 (m, 2H), 7.48 (d,  $J = 8.6$  Hz, 1H), 7.24 (d,  $J = 10.0$  Hz, 1H), 6.82 (d,  $J = 10.0$  Hz, 1H), 6.05 (ddt,  $J = 9.9, 8.6, 6.9$  Hz, 2H), 2.41 (t,  $J = 6.9$  Hz, 2H).  $^{13}\text{C}$  NMR (126 MHz,  $\text{CDCl}_3$ )  $\delta$  134.8, 133.6, 132.2, 131.7, 130.3, 128.8, 128.3, 128.2, 126.9, 126.5, 126.2, 125.7, 125.2, 124.8, 26.5.

HRMS-EI calculated for  $\text{C}_{15}\text{H}_{12}$   $[\text{M}]^+$ : 192.0939; found: 192.0939  
**(1*R*\*,1*aS*\*,1*bS*\*,2*S*\*,2*aS*\*,6*bS*\*)-1,2-diphenyl-1,1*a*,1*b*,2,2*a*,6*b*-hexahydrocyclopropa[*a,c*]naphthalene (15)**

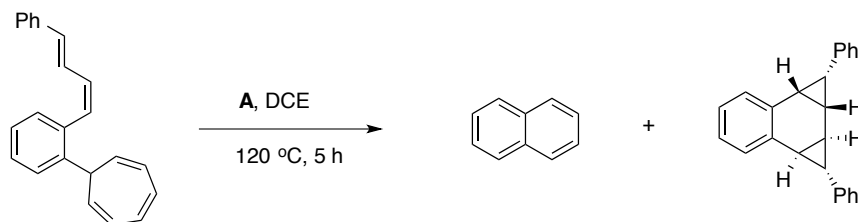

The 1 mL DCE solution of **7u** (45 mg, 0.15 mmol) and gold catalyst **A** (5.5 mg, 5 mol %) was heated at 120 °C for 5 h. After cooling to room temperature, the solvent was removed in vacuo. The residue was passed through a short column of silica, and naphthalene (colorless solid, 4.6 mg, 24%) was separated from the crude residue. The remaining mixture was purified carefully with preparative TLC to give **15** as a colorless solid (5.9 mg, 12%).

$^1\text{H}$  NMR (500 MHz,  $\text{CDCl}_3$ )  $\delta$  7.39 - 7.10 (m, 12H), 7.00 (td,  $J = 7.5, 1.4$  Hz, 1H), 6.90 (dd,  $J = 7.6, 1.4$  Hz, 1H), 2.59 (dd,  $J = 9.4, 8.2$  Hz, 1H), 2.38 - 2.32 (m, 2H), 2.11 (t,  $J = 4.6$  Hz, 1H), 2.06 (dd,  $J = 8.5, 4.7$  Hz, 1H), 1.66 (dd,  $J = 8.6, 4.3$  Hz, 1H).  $^{13}\text{C}$  NMR (101 MHz,  $\text{CDCl}_3$ )  $\delta$  142.2, 136.6, 135.8, 131.3, 130.9, 130.1, 128.5, 128.3, 127.6, 125.7, 125.6, 125.5, 125.4, 125.3, 35.7, 29.7, 29.0, 25.4, 20.8, 20.2.

HRMS-APCI calculated for  $\text{C}_{24}\text{H}_{21}$   $[\text{M}+\text{H}]^+$ : 309.1643; found: 309.1649

**(1*R*\*,1*aS*\*,6*aR*\*)-1,6*a*-diphenyl-1,1*a*,6,6*a*-tetrahydrocyclopropa[*a*]indene (5a) and (5a')**

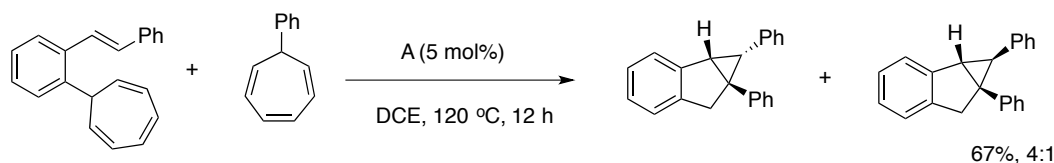

The DCE solution of (*E*)-7-(2-styrylphenyl)cyclohepta-1,3,5-triene **7a** (27 mg, 0.1 mmol) and gold complex (3.7mg, 5 mol %) was heated at 120 °C for 2 h. After cooling to room temperature, 7-phenylcyclohepta-1,3,5-triene **1a**<sup>22</sup> (34 mg, 0.2 mmol) was added, and the mixture was heated to 120 °C overnight (12 h). The reaction mixture was cooled to room temperature, the solvent was removed in vacuo, and the resulting residue was purified by preparative TLC to give 19 mg of the title mixture (67%, 4:1) as a colorless solid.

m.p. 84.5-87.8 °C

(22) This compound was reported in: Solorio-Alvarado, C. R.; Wang, Y.; Echavarren, A. M. *J. Am. Chem. Soc.* **2011**, *133*, 11952-11955.

$^1\text{H}$  NMR (400 MHz,  $\text{CDCl}_3$ )  $\delta$  7.52 - 6.83 (m, aromatic 14H major + 14H minor), 3.68 (d,  $J = 16.9$  Hz, 1H minor), 3.49 (d,  $J = 17.0$  Hz, 1H minor), 3.42 (d,  $J = 17.3$  Hz, 1H major), 3.34 (dd,  $J = 8.4, 1.6$  Hz, 1H major), 3.26 (dd,  $J = 3.6, 1.5$  Hz, 1H minor), 3.16 (d,  $J = 17.3$  Hz, 1H major), 2.88 (d,  $J = 8.3$  Hz, 1H major), 2.11 (d,  $J = 3.5$  Hz, 1H minor).  $^{13}\text{C}$  NMR (101 MHz,  $\text{CDCl}_3$ , major + minor)  $\delta$  146.3, 145.1, 142.6, 141.8, 139.8, 138.7, 135.4, 130.7, 129.8, 128.6, 128.1, 127.6, 127.2, 126.3, 126.1, 126.1, 125.8, 125.6, 125.3, 125.2, 124.2, 124.1, 123.3, 45.3, 41.7, 41.5, 38.5, 38.4, 37.7, 37.2, 35.9.

The relative configuration was confirmed by NOE.

HRMS-APCI: calculated for  $\text{C}_{22}\text{H}_{19}$   $[\text{M}+\text{H}]^+$ : 283.1481; found: 283.1498

### Experimental Details on the Synthesis of Fluorenes

#### 9H-Fluorene (18a)

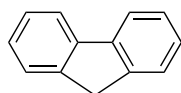

This compound was prepared as a colorless solid in 64% yield from **17a** according to the general procedure B.

The spectroscopic data match with those reported in the literature.<sup>23</sup>

$^1\text{H}$  NMR (400 MHz,  $\text{CDCl}_3$ )  $\delta$  7.83 (d,  $J = 7.4$  Hz, 2H), 7.58 (d,  $J = 7.4$  Hz, 2H), 7.41 (td,  $J = 7.5, 1.1$  Hz, 2H), 7.33 (td,  $J = 7.4, 1.2$  Hz, 2H), 3.94 (s, 2H).  $^{13}\text{C}$  NMR (101 MHz,  $\text{CDCl}_3$ )  $\delta$  143.2, 141.7, 126.7, 126.6, 125.0, 119.8, 36.9.

#### 2-(tert-Butyl)-9H-fluorene (18b)

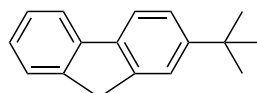

This compound was prepared as a colorless solid in 87% yield from **17b** according to the general procedure B.

The spectroscopic data match with those reported in the literature.<sup>24</sup>

$^1\text{H}$  NMR (300 MHz,  $\text{CDCl}_3$ )  $\delta$  7.69 (d,  $J = 7.5$  Hz, 1H), 7.66 (d,  $J = 8.0$  Hz, 1H), 7.53 (s, 1H), 7.47 (d,  $J = 7.3$  Hz, 1H), 7.37 (d,  $J = 7.9$  Hz, 1H), 7.29 (t,  $J = 7.3$  Hz, 1H), 7.20 (t,  $J = 7.3$  Hz, 1H), 3.83 (s, 2H), 1.33 (s, 9H).  $^{13}\text{C}$  NMR (75 MHz,  $\text{CDCl}_3$ )  $\delta$  149.9, 143.2, 143.0, 141.6, 139.0, 126.5, 126.1, 124.8, 123.8, 121.8, 119.5, 119.2, 36.9, 34.7, 31.5.

#### 2-Phenyl-9H-fluorene (18c)

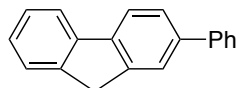

This compound was prepared as a colorless solid in 56% yield from **17c** according to the general procedure B using catalyst E.

(23) Clive, D. L. J.; Sunasee, R. *Org. Lett.* **2007**, *9*, 2677–2680.

(24) Fuchibe, K. *J. Am. Chem. Soc.* **2006**, *128*, 1434–1435.

The spectroscopic data match with those reported in the literature.<sup>25</sup>

<sup>1</sup>H NMR (400 MHz, CDCl<sub>3</sub>) δ 7.90 - 7.80 (m, 3H), 7.73 - 7.64 (m, 3H), 7.60 (d, *J* = 7.2 Hz, 1H), 7.48 (t, *J* = 7.9 Hz, 2H), 7.45 - 7.32 (m, 3H), 4.00 (s, 2H). <sup>13</sup>C NMR (101 MHz, CDCl<sub>3</sub>) δ 143.8, 143.4, 141.5, 141.4, 140.9, 139.8, 128.7, 127.1, 127.1, 126.8, 126.7, 126.0, 125.0, 123.8, 120.1, 119.9, 37.0.

### 2-Methoxy-9H-fluorene (18d)

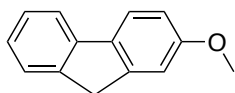

This compound was prepared as a colorless solid in 52% yield from **17d** according to the general procedure B using catalyst E.

The spectroscopic data match with those reported in the literature.<sup>26</sup>

<sup>1</sup>H NMR (500 MHz, CDCl<sub>3</sub>) δ 7.73 – 7.69 (m, 2H), 7.53 (d, *J* = 7.5 Hz, 1H), 7.37 (t, *J* = 7.5 Hz, 1H), 7.26 (td, *J* = 7.4, 1.1 Hz, 1H), 7.13 (d, *J* = 2.4 Hz, 1H), 6.96 (dd, *J* = 8.4, 2.5 Hz, 1H), 3.90 (s, 5H). <sup>13</sup>C NMR (126 MHz, CDCl<sub>3</sub>) δ 159.2, 145.0, 142.6, 141.6, 134.7, 126.7, 125.5, 124.8, 120.5, 119.0, 112.9, 110.5, 55.5, 37.0.

### 2-Chloro-9H-fluorene (18e)

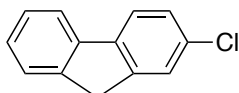

This compound was prepared as a colorless solid in 42% yield from **17e** according to the general procedure B.

The spectroscopic data match with those reported in the literature.<sup>26</sup>

<sup>1</sup>H NMR (500 MHz, CDCl<sub>3</sub>) δ 7.78 (d, *J* = 7.6 Hz, 1H), 7.72 (d, *J* = 8.2 Hz, 1H), 7.59 - 7.53 (m, 2H), 7.41 (td, *J* = 7.5, 1.0 Hz, 1H), 7.38 (dd, *J* = 8.1, 2.0 Hz, 1H), 7.34 (td, *J* = 7.4, 1.2 Hz, 1H), 3.92 (s, 2H). <sup>13</sup>C NMR (126 MHz, CDCl<sub>3</sub>) δ 144.8, 142.9, 140.6, 140.2, 132.3, 127.0, 126.9, 126.9, 125.3, 125.0, 120.7, 119.9, 36.8.

### 1-Chloro-9H-fluorene (18f) and 3-Chloro-9H-fluorene (18f')

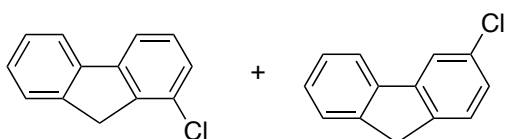

1.2 : 1

These compounds were prepared as a colorless solid in 56% yield from **17f** according to the general procedure B.

Their spectroscopic data match with those reported in the literature.<sup>26</sup>

<sup>1</sup>H NMR (400 MHz, CDCl<sub>3</sub>) δ 7.82 - 7.76 (m, major 1H, minor 2H), 7.70 (dd, *J* = 7.3, 1.1 Hz, major 1H), 7.63 – 7.54 (m, major 1H, minor 1H), 7.48 – 7.27 (m, major 4H, minor 4H), 3.95 (s, major 2H), 3.88 (s, minor 2H). <sup>13</sup>C NMR (101 MHz, CDCl<sub>3</sub>) δ major + minor : <sup>13</sup>C NMR (101 MHz, CDCl<sub>3</sub>) δ 143.7, 143.5, 143.5, 142.6, 141.3,

(25) Mu, B.; Li, T.; Li, J.; Wu, Y. *J. Organomet. Chem.* **2008**, 693, 1243–1251.

(26) Hwang, S.-J.; Kim, H.-J.; Chang, S. *Org. Lett.*, **2009**, 11, 4588-4591.

141.1, 140.6, 128.4, 127.3, 126.9, 126.6, 126.6, 125.9, 125.1, 120.3, 120.1, 118.2, 36.6, 36.5.

#### 4-Bromo-9H-fluorene (18g)

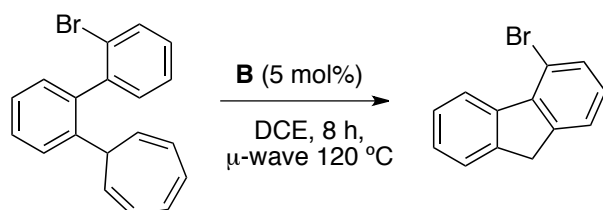

Gold catalyst **B** (13.5 mg, 0.015 mmol) and 2-bromo-2'-(cyclohepta-2,4,6-trien-1-yl)-1,1'-biphenyl **17g** (97 mg, 0.3 mmol) were mixed in a Biotage 2 – 5 mL microwave vial. The solids were dissolved in 1,2-dichloroethane (1.2 mL) before the vial was sealed and heated to 120 °C in a Biotage initiator microwave for 8 h. Afterwards, the solution was filtered through Celite, concentrated and purified by flash chromatography (cyclohexane) to yield the desired fluorene (18.1 mg, 0.074 mmol, 25%) as a colorless solid.

$^1\text{H}$  NMR (300 MHz,  $\text{CDCl}_3$ )  $\delta$  8.64 (d,  $J = 9.0$  Hz, 1H), 7.60 - 7.32 (m, 5H), 7.14 (t,  $J = 7.7$  Hz, 1H), 3.95 (s, 2H).  $^{13}\text{C}$  NMR (75 MHz,  $\text{CDCl}_3$ )  $\delta$  146.17, 143.68, 141.16, 140.01, 131.90, 127.64, 127.45, 126.61, 124.85, 123.93, 123.67, 117.05, 37.40.

HRMS-APCI calculated for  $\text{C}_{13}\text{H}_9\text{Br}$  [ $M$ ] $^+$ : 243.9882; found: 243.9880.

#### 4-Methyl-9H-fluorene (18h)

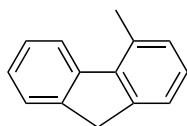

This compound was prepared as a colorless solid in 74% yield from **17h** according to the general procedure B.

The spectroscopic data match with those reported in the literature.<sup>26</sup>

$^1\text{H}$  NMR (400 MHz,  $\text{CDCl}_3$ )  $\delta$  7.98 (d,  $J = 7.7$  Hz, 1H), 7.61 (d,  $J = 7.4$  Hz, 1H), 7.44 (td,  $J = 7.6, 1.1$  Hz, 2H), 7.35 (td,  $J = 7.4, 1.2$  Hz, 1H), 7.26 (t,  $J = 7.4$  Hz, 1H), 7.20 (d,  $J = 7.5$  Hz, 1H), 3.96 (s, 2H), 2.79 (s, 3H).  $^{13}\text{C}$  NMR (101 MHz,  $\text{CDCl}_3$ )  $\delta$  143.6, 143.6, 142.7, 139.8, 133.0, 128.9, 126.6, 126.4, 126.0, 124.8, 123.1, 122.4, 37.1, 21.1.

#### 7H-benzo[c]fluorene (18i)

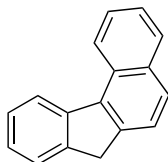

A solution of 1-(2-(cyclohepta-2,4,6-trien-1-yl)phenyl)naphthalene **17i** (20.2 mg, 69  $\mu\text{mol}$ ) and gold complex **A** (2.6 mg, 3.4  $\mu\text{mol}$ ) in DCE (0.68 mL) was heated at 120 °C in a sealed tube until the starting material had been fully consumed (3 h). The reaction mixture was cooled to room temperature, the solvent was removed in vacuo, and the crude residue was purified by chromatography (Combiflash 4 g column, cyclohexane eluent) to give the title compound in 59% yield as a colorless solid (8.7 mg).



The spectroscopic data match with those reported in the literature.<sup>27</sup>

<sup>1</sup>H NMR (500 MHz, CDCl<sub>3</sub>) δ 8.79 (d, *J* = 8.4 Hz, 1H), 8.41 (d, *J* = 7.8 Hz, 1H), 7.98 (d, *J* = 8.1 Hz, 1H), 7.83 (d, *J* = 8.2 Hz, 1H), 7.71 (d, *J* = 8.3 Hz, 1H), 7.68 – 7.63 (m, 2H), 7.56 – 7.48 (m, 2H), 7.36 (td, *J* = 7.4, 1.0 Hz, 1H), 4.03 (s, 2H). <sup>13</sup>C NMR (126 MHz, CDCl<sub>3</sub>) δ 144.3, 142.9, 142.4, 136.2, 133.5, 129.7, 129.3, 127.8, 127.0, 126.6, 125.8, 125.1, 125.0, 123.8, 123.4, 123.0, 37.9.

### 7*H*-Dibenzo[*c,g*]fluorene (18j)

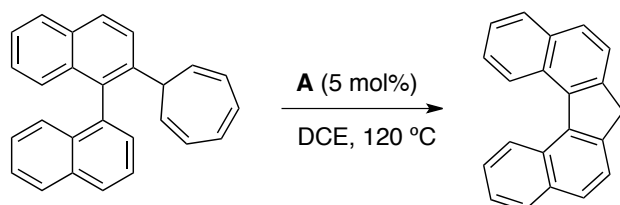

This compound was synthesized in 67% yield as a colorless solid following the general procedure B, starting from 2-(cyclohepta-2,4,6-trien-1-yl)-1,1'-binaphthalene **17j** and gold catalyst **A**. After cooling to room temperature, the solution was filtered through Celite, concentrated and purified by flash chromatography (cyclohexane) to yield the title compound. The spectroscopic data matched with those reported in the literature.<sup>28</sup>

<sup>1</sup>H NMR (300 MHz, CDCl<sub>3</sub>) δ 8.76 (dq, *J* = 7.9, 0.9 Hz, 2H), 8.00 (dd, *J* = 7.9, 1.7 Hz, 2H), 7.89 (d, *J* = 8.2 Hz, 2H), 7.76 (d, *J* = 8.2 Hz, 2H), 7.63 - 7.50 (m, 4H), 4.14 (s, 2H). <sup>13</sup>C NMR (75 MHz, CDCl<sub>3</sub>) δ 143.02, 138.49, 134.02, 128.98, 128.89, 127.70, 126.82, 125.00, 124.88, 123.00, 39.02.

### 6,12-Dihydroindeno[1,2-*b*]fluorene (18k/18k')

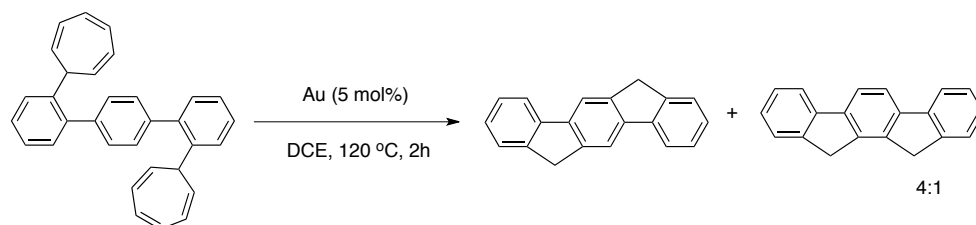

The 1 mL DCE solution of substrate **17k** (41 mg, 0.1 mmol) and gold catalyst **A** (3.7 mg, 5 mol %) was heated at 120 °C for 2 h. After cooling to room temperature, the solvent was removed in vacuo. 1 mL acetone was added to dissolve some of the residue. The liquid was decanted, leaving behind a colorless solid which was dried in vacuo to give a 4:1 mixture of **18k/18k'** (13.5 mg, 53%).

The spectroscopic data match with those reported in the literature.<sup>29</sup>

(27) Laali, K. K.; Okazaki, T.; Sultana, F.; Bunge, S. D.; Banik, B. K.; Swartz, C. *Eur. J. Org. Chem.* **2008**, 1740–1752.

(28) (a) Laali, K. K.; Okazaki, T.; Sultana, F.; Bunge, S. D.; Banik, B. K.; Swartz, C. *Eur. J. Org. Chem.* **2008**, 1740–1752. (b) Harvey, R. D.; Pataki, J.; Cortez, C.; Raddo, P. D.; Yang, C.-X. *J. Org. Chem.* **1991**, 56, 1210-1217.

(29) Major isomer: (a) Poriel, C.; Liang, J.-J.; Rault-Berthelot, J.; Barrière, F.; Cocherel, N.; Slawin, A. M. Z.; Horhant, D.; Virboul, M.; Alcaraz, G.; Audebrand, N.; Vignau, L.; Huby, N.; Wantz, G.; Hirsch, L. *Chem. Eur. J.* **2007**, 13, 10055–

$^1\text{H}$  NMR (400 MHz,  $\text{CDCl}_3$ )  $\delta$  7.97 (s, 2H, major), 7.85 - 7.81 (m, 2H major + 4H minor), 7.60 - 7.56 (m, 2H major + 2H minor), 7.42 (td,  $J = 7.5$ , 1.2 Hz, 2H major + 2H minor), 7.32 (td,  $J = 7.4$ , 1.3 Hz, 2H major + 2H minor), 4.00 (s, 4H major), 3.98 (s, 4H minor).  $^{13}\text{C}$  NMR (101 MHz,  $\text{CDCl}_3$ )  $\delta$  143.6, 142.3, 141.8, 140.8, 126.8 (minor), 126.7, 126.5 (minor), 126.4, 125.1 (minor), 125.0, 119.9 (minor), 119.5, 118.7 (minor), 116.4, 36.7, 35.5 (minor).

**(1*R*\*,2*R*\*,3*R*\*,4*R*\*,7*R*\*,8*S*\*)-3,8-di(9*H*-fluoren-4-yl)tricyclo[5.1.0.0<sup>2,4</sup>]oct-5-ene (19)**

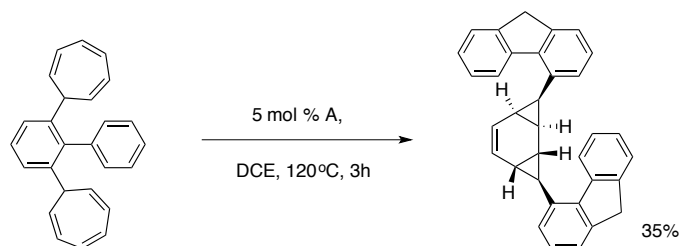

This compound (**19**) was prepared as a yellow oil in 35% yield from **171** according to the general procedure B.

$^1\text{H}$  NMR (400 MHz,  $\text{CDCl}_3$ )  $\delta$  8.36 (d,  $J = 7.8$  Hz, 1H), 8.20 (d,  $J = 8.0$  Hz, 1H), 7.61 - 7.56 (m, 2H), 7.50 - 7.31 (m, 7H), 7.21 (t,  $J = 7.6$  Hz, 1H), 7.16 (t,  $J = 7.5$  Hz, 1H), 6.99 (d,  $J = 7.5$  Hz, 1H), 5.76 (dd,  $J = 9.8$ , 4.5 Hz, 1H), 5.68 (dd,  $J = 9.8$ , 4.6 Hz, 1H), 3.95 (s, 2H), 3.90 (s, 2H), 2.83 (t,  $J = 8.5$  Hz, 1H), 2.67 (t,  $J = 4.7$  Hz, 1H), 2.54 (t,  $J = 8.5$  Hz, 1H), 2.09 - 1.94 (m, 2H), 0.97 (dt,  $J = 8.6$ , 4.5 Hz, 1H).  $^{13}\text{C}$  NMR (101 MHz,  $\text{CDCl}_3$ )  $\delta$  143.6, 143.6, 143.5, 142.6, 142.2, 141.9, 140.6, 136.1, 132.0, 130.6, 127.1, 126.6, 126.5, 126.3, 126.0, 125.9, 125.5, 124.9, 124.7, 124.7, 123.5, 123.2, 122.8, 122.6, 121.4, 37.1, 36.9, 35.3, 30.7, 21.9, 21.5, 20.5, 17.4.

HRMS-MALDI: calculated for  $\text{C}_{34}\text{H}_{26}$   $[\text{M}]^+$ : 434.2035; found: 434.2098

**9*H*-xanthene (23a)**

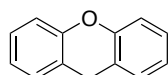

A solution of 7-(2-phenoxyphenyl)cyclohepta-1,3,5-triene **22a** (26 mg, 0.1 mmol) and gold complex **E** (4 mg, 5 mol %) in toluene (1 mL) was heated at 120 °C in a sealed tube for 2 h. After cooling to room temperature, the solvent was removed in vacuo and the residue was purified by preparative TLC (eluent: cyclohexane) to give 5.5 mg the title compound in 30% yield as a colorless solid.

The spectroscopic data match with those reported in the literature.<sup>30</sup>

$^1\text{H}$  NMR (500 MHz,  $\text{CDCl}_3$ )  $\delta$  7.25 - 7.18 (m, 4H), 7.09 - 7.03 (m, 4H), 4.08 (s, 2H).  $^{13}\text{C}$  NMR (126 MHz,  $\text{CDCl}_3$ )  $\delta$  151.96, 128.90, 127.63, 122.94, 120.58, 116.45, 27.89.

**((1*R*\*,2*R*\*)-3-(2-Phenoxyphenyl)cyclopropane-1,2-diyl)dibenzene (24a)**

10069. Minor isomer: (b) Thirion, D., Poriel, C., Rault-Berthelot, J.; Barrière, F.; Jeannin, O. *Chem. Eur. J.* **2010**, *16*, 13646–13658.

(30) Okuma, K.; Nojima, A.; Matsunaga, N.; Shioji, K. *Org. Lett.* **2009**, *11*, 169–171.

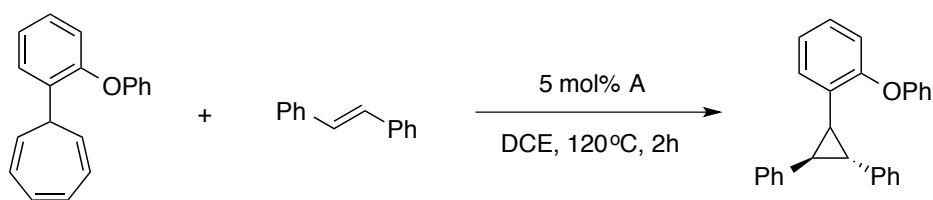

A solution of 7-(2-phenoxyphenyl)cyclohepta-1,3,5-triene **22a** (26 mg, 0.1 mmol), (*E*)-1,2-diphenylethene (36 mg, 0.2 mmol) and gold complex **A** (3.7 mg, 5%) in DCE (0.5 mL) was heated at 120 °C in a sealed tube for 2 h. After cooling to room temperature, the solvent was removed in vacuo and the residue was purified by preparative TLC (eluent: cyclohexane) to give 29.2 mg the title compound in 81% yield as a colorless oil.

$^1\text{H}$  NMR (400 MHz,  $\text{CDCl}_3$ )  $\delta$  7.38 - 6.96 (m, 13H), 7.05 - 6.96 (m, 3H), 6.76 - 6.66 (m, 3H), 3.02 - 2.95 (m, 2H), 2.81 (dd,  $J = 8.6, 6.8$  Hz, 1H).  $^{13}\text{C}$  NMR (101 MHz,  $\text{CDCl}_3$ )  $\delta$  157.27, 156.45, 141.84, 138.23, 130.27, 129.55, 128.46, 128.39, 128.15, 127.73, 127.53, 126.59, 126.06, 125.73, 122.83, 122.81, 118.52, 118.16, 34.30, 30.27, 29.64.

HRMS-APCI: calculated for  $\text{C}_{27}\text{H}_{23}\text{O}$   $[\text{M}+\text{H}]^+$ : 363.1743; found: 363.1740

#### **((1*R*\*,2*R*\*)-3-(2-(benzyloxy)phenyl)cyclopropane-1,2-diyl)dibenzene (24b)**

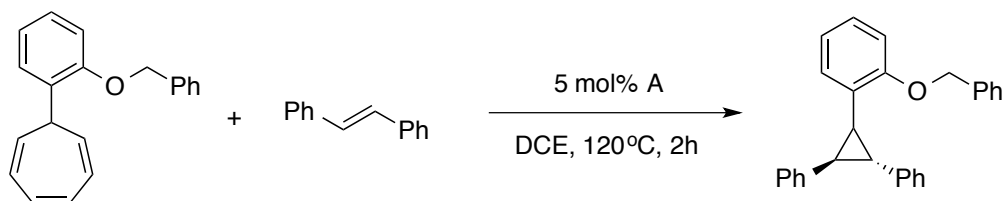

A solution of 7-(2-(benzyloxy)phenyl)cyclohepta-1,3,5-triene **22b** (27 mg, 0.1 mmol), (*E*)-1,2-diphenylethene (36 mg, 0.2 mmol) and gold complex **A** (3.7 mg, 5 mol %) in DCE (0.5 mL) was heated at 120 °C in a sealed tube for 2 h. After cooling to room temperature, the solvent was removed in vacuo and the residue was purified by preparative TLC (eluent: cyclohexane) to give 28.4 mg the title compound in 75% yield as a colorless oil.

$^1\text{H}$  NMR (500 MHz,  $\text{CDCl}_3$ )  $\delta$  7.42 - 7.26 (m, 10H), 7.20 - 7.10 (m, 5H), 7.00 (dd,  $J = 7.7, 1.8$  Hz, 2H), 6.88 (td,  $J = 7.5, 1.1$  Hz, 1H), 6.81 - 6.77 (m, 1H), 5.06 (d,  $J = 12.2$  Hz, 1H), 4.88 (d,  $J = 12.2$  Hz, 1H), 3.06 (dd,  $J = 9.6, 6.4$  Hz, 1H), 2.95 (t,  $J = 6.0$  Hz, 1H), 2.83 (dd,  $J = 9.6, 5.7$  Hz, 1H).  $^{13}\text{C}$  NMR (126 MHz,  $\text{CDCl}_3$ )  $\delta$  158.01, 142.23, 138.73, 137.49, 129.95, 128.47, 128.45, 127.97, 127.58, 127.57, 127.50, 126.96, 126.71, 126.14, 126.00, 125.56, 120.26, 111.58, 69.80, 34.18, 30.56, 29.74.

HRMS-APCI: calculated for  $\text{C}_{28}\text{H}_{25}\text{O}$   $[\text{M}+\text{H}]^+$ : 377.1900; found: 377.1890

#### **2-(2-Phenoxybenzyl)-1-phenylbutane-1,3-dione (25a)**

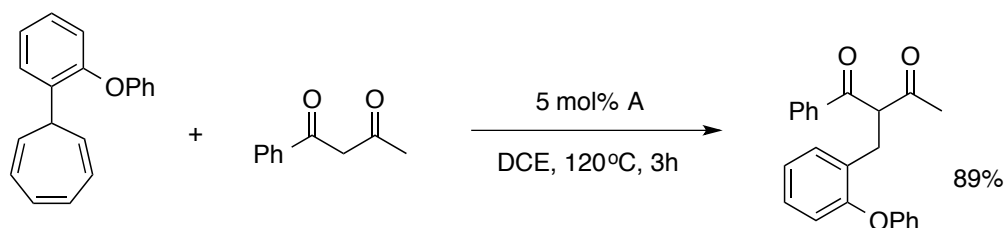

The solution of 7-(2-phenoxyphenyl)cyclohepta-1,3,5-triene **22a** (0.3mmol, 78mg), 1-phenylbutane-1, 3-dione (0.15mmol, 24mg) and gold complex A (5.5mg, 5mol %) in DCE (0.5mL) was heated at 120 °C in a sealed tube for 3h. The reaction mixture was cooled down to room temperature, after removing the solvent in vacuum, purified by chromatography directly to give 46mg yellow oil in 89% yield.

<sup>1</sup>H NMR (300 MHz, CDCl<sub>3</sub>) δ 7.94 (d, *J* = 7.0 Hz, 2H), 7.55 (t, *J* = 7.4 Hz, 1H), 7.46 - 7.30 (m, 5H), 7.21 - 7.09 (m, 2H), 7.07 - 6.96 (m, 3H), 6.86 (dd, *J* = 8.1, 1.2 Hz, 1H), 4.99 (t, *J* = 7.1 Hz, 1H), 3.45 - 3.27 (m, 2H), 2.14 (s, 3H). <sup>13</sup>C NMR (75 MHz, CDCl<sub>3</sub>) δ 203.25, 196.10, 157.18, 154.84, 136.34, 133.62, 132.02, 129.91, 129.55, 128.76, 128.74, 128.29, 123.82, 123.22, 118.89, 118.11, 62.48, 30.15, 28.94.

HRMS-ESI: calculated for C<sub>23</sub>H<sub>20</sub>NaO<sub>3</sub> [M+Na]<sup>+</sup>: 367.1305; found: 367.1314

## 4. NMR Spectra

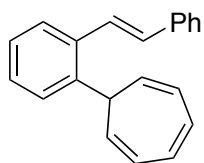

WYH-4-64/10  
ResearchGroup Echavarren  
ICIQ\_1H12p8s CDCl3 /opt/topspin ywang 115

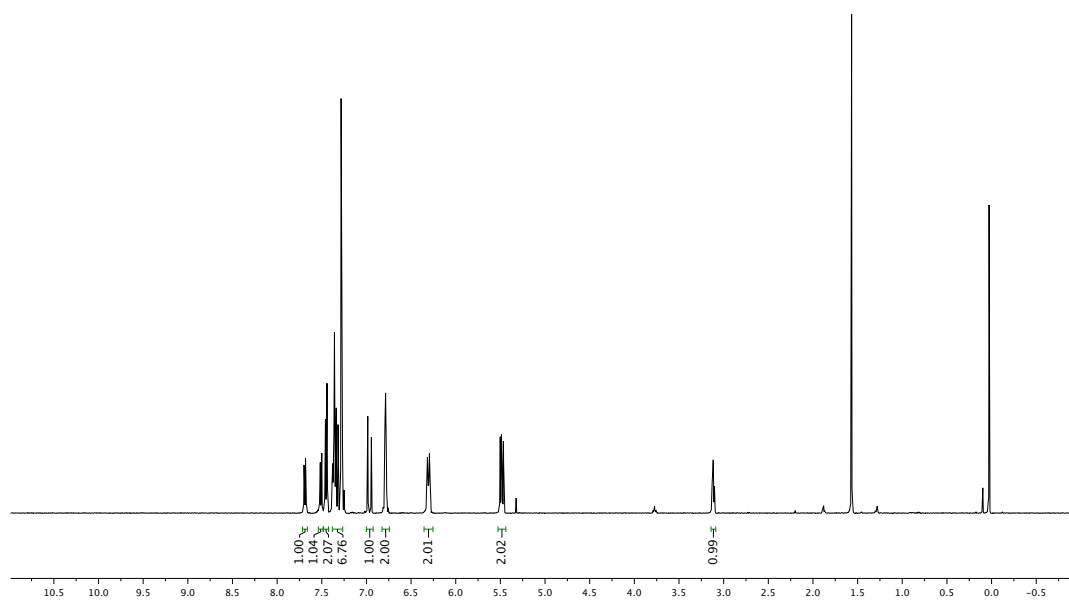

WYH-4-64/11  
ResearchGroup Echavarren  
ICIQ\_13C11H12p8s CDCl3 /opt/topspin ywang 115

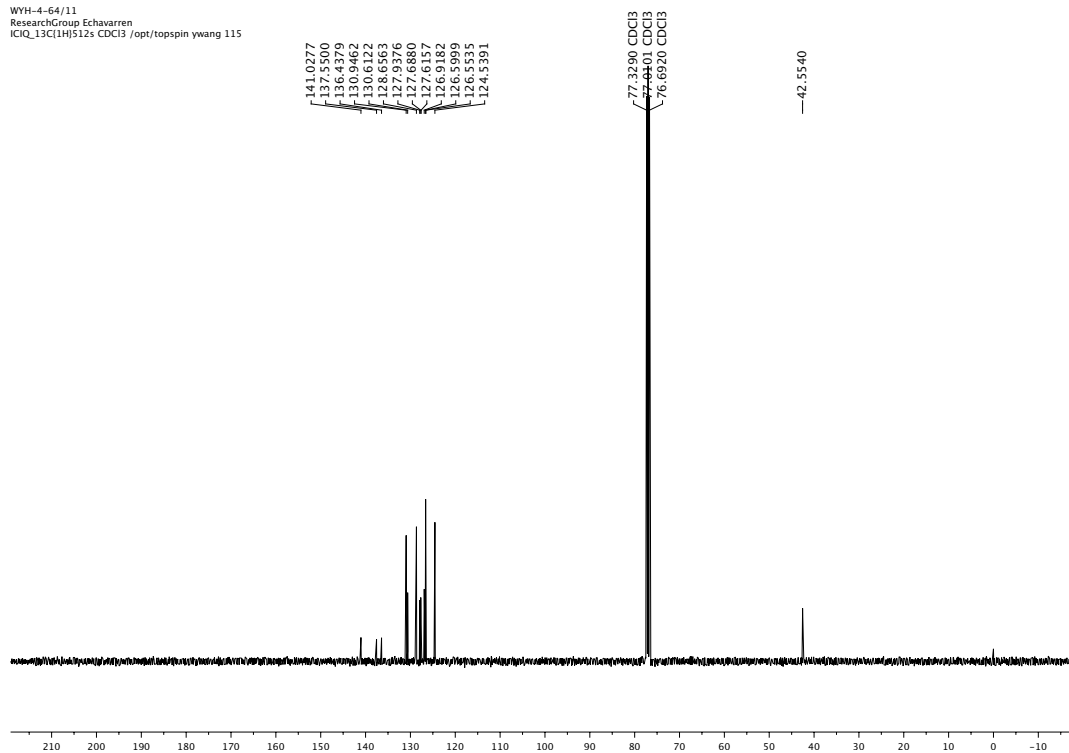

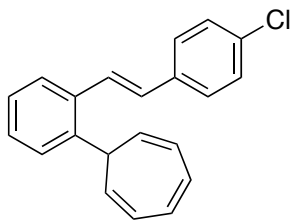

WYH-4-82N/1  
1H Experiment

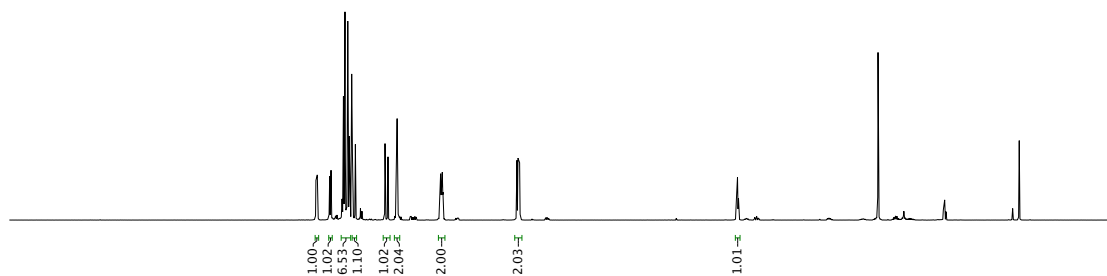

WYH-4-82N/2  
13C[1H] Experiment

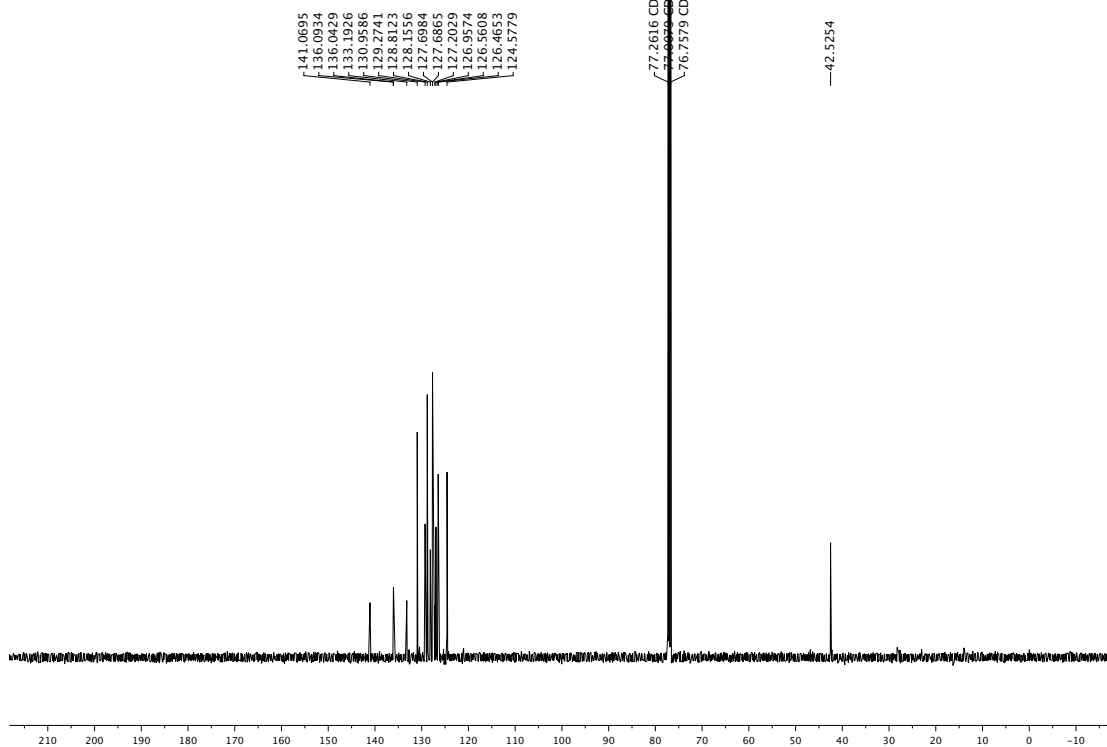

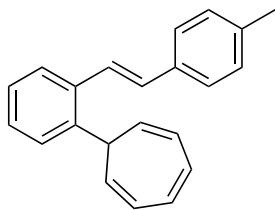

WYH-4-83N/1  
1H Experiment

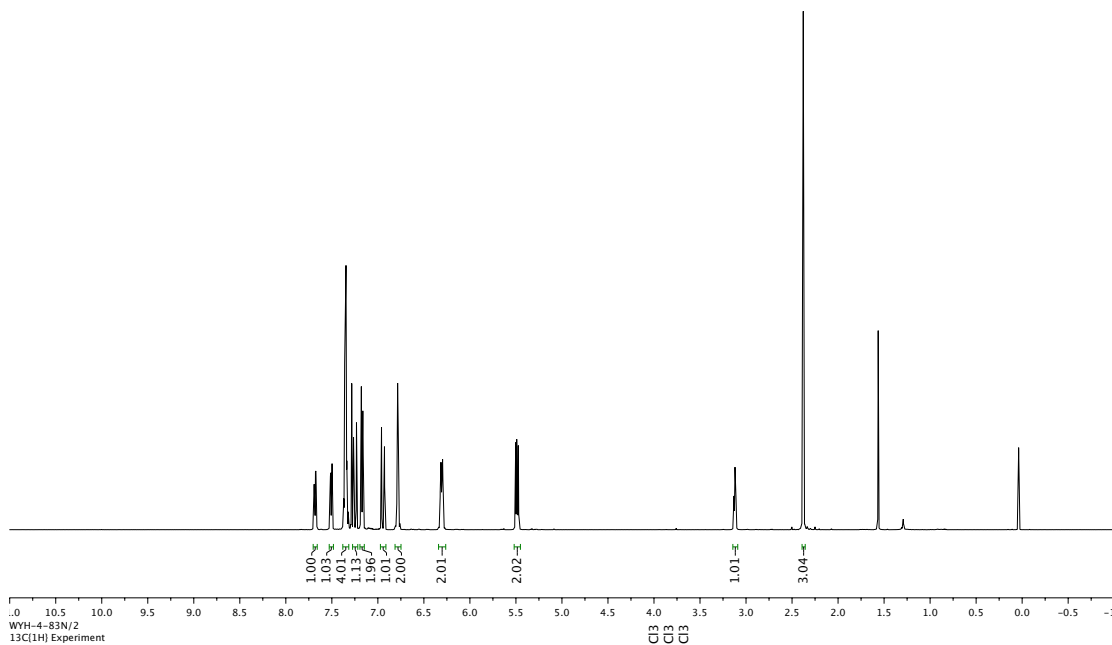

WYH-4-83N/2  
13C[1H] Experiment

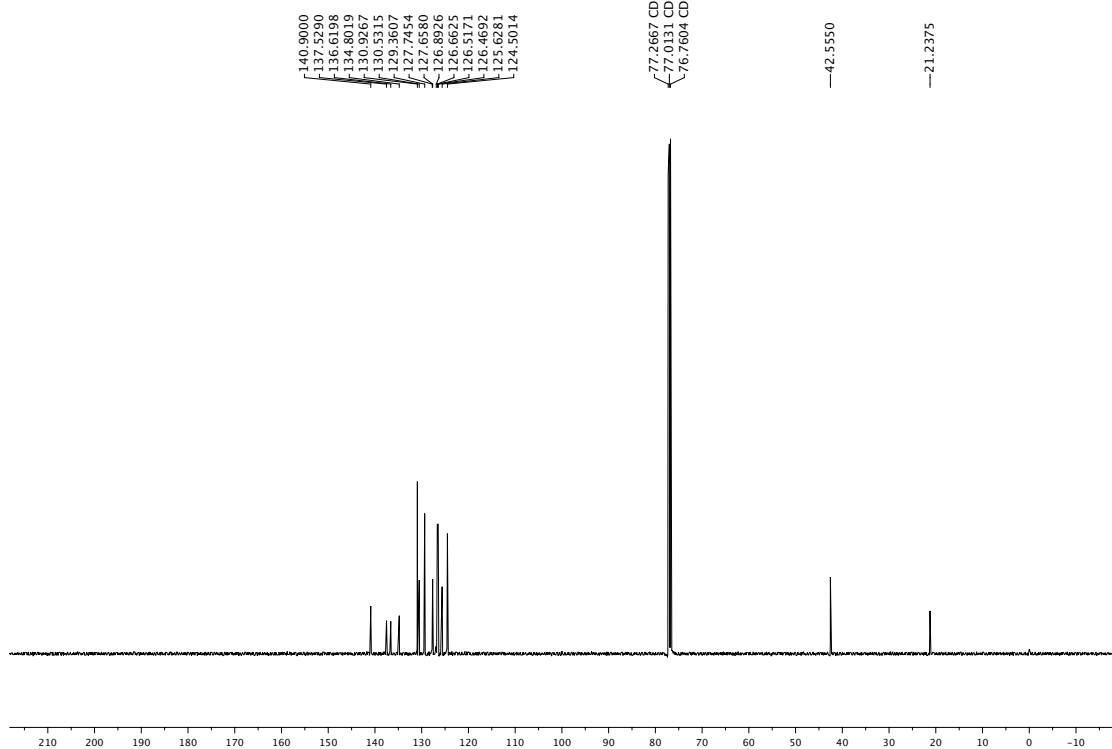

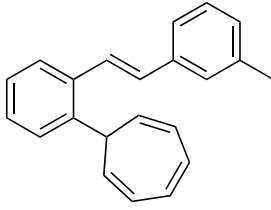

WYH-4-84-N/10  
 ResearchGroup Echavarren  
 ICIQ\_1H12p8s CDCI3 /opt/topspin ywang 78

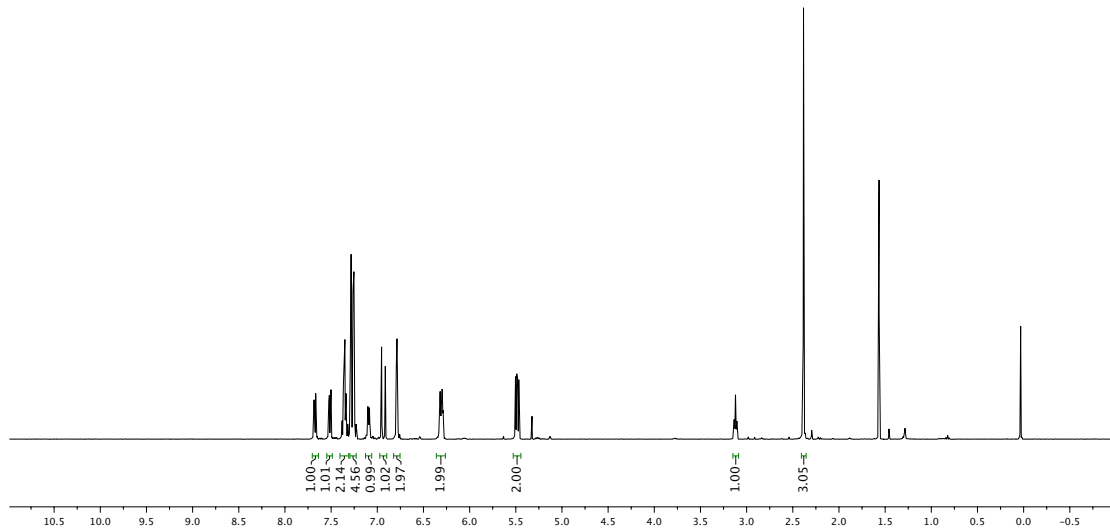

WYH-4-84-N/11  
 ResearchGroup Echavarren  
 ICIQ\_13C11H512s CDCI3 /opt/topspin ywang 78

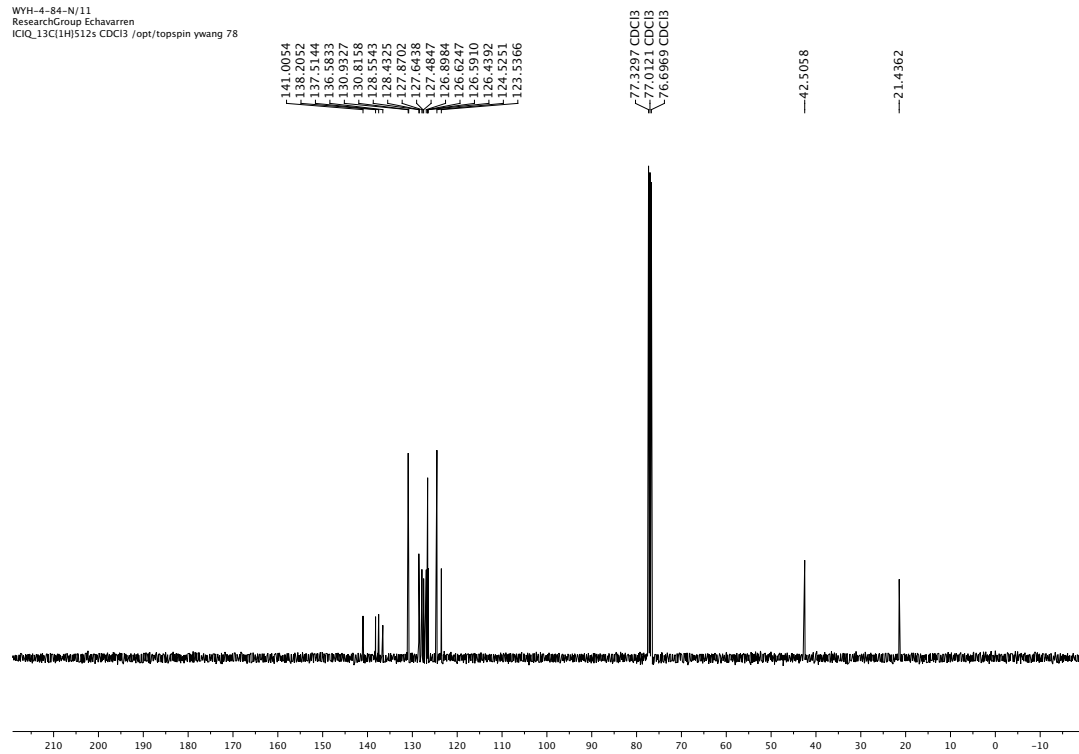



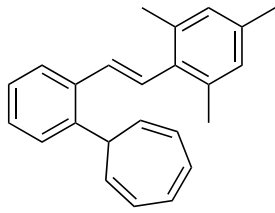

WYH-4-85-N/10  
 ResearchGroup Echavarren  
 ICIQ\_1H12p8s CDCl3 /opt/topspin ywang 79

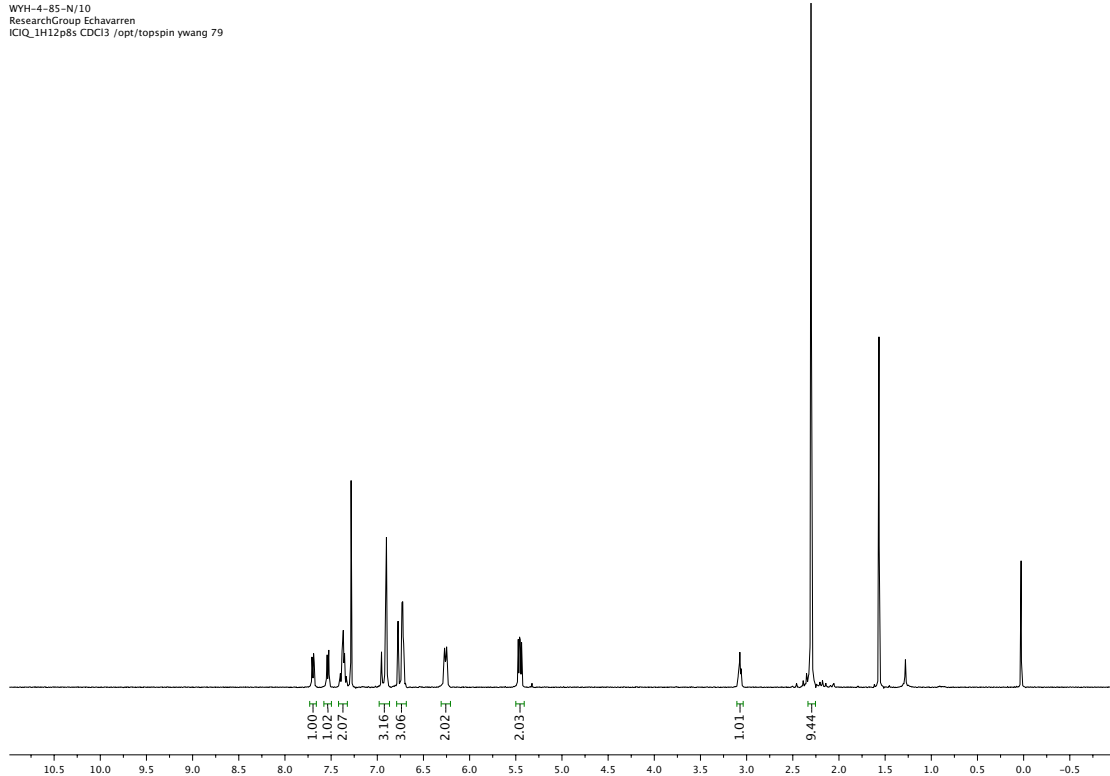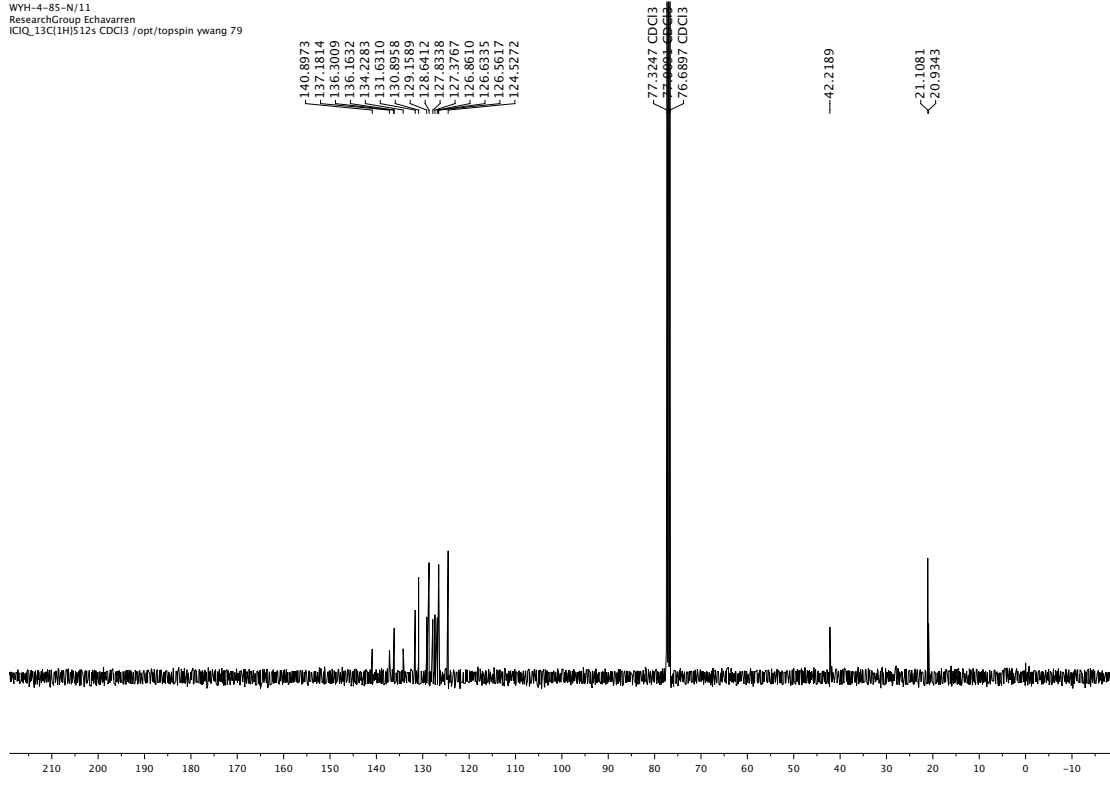

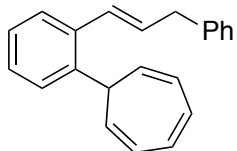

WYH-4-123/10  
 ResearchGroup Echavarren  
 ICIQ\_1H12p8s CDCI3 /opt/topspin ywang 24

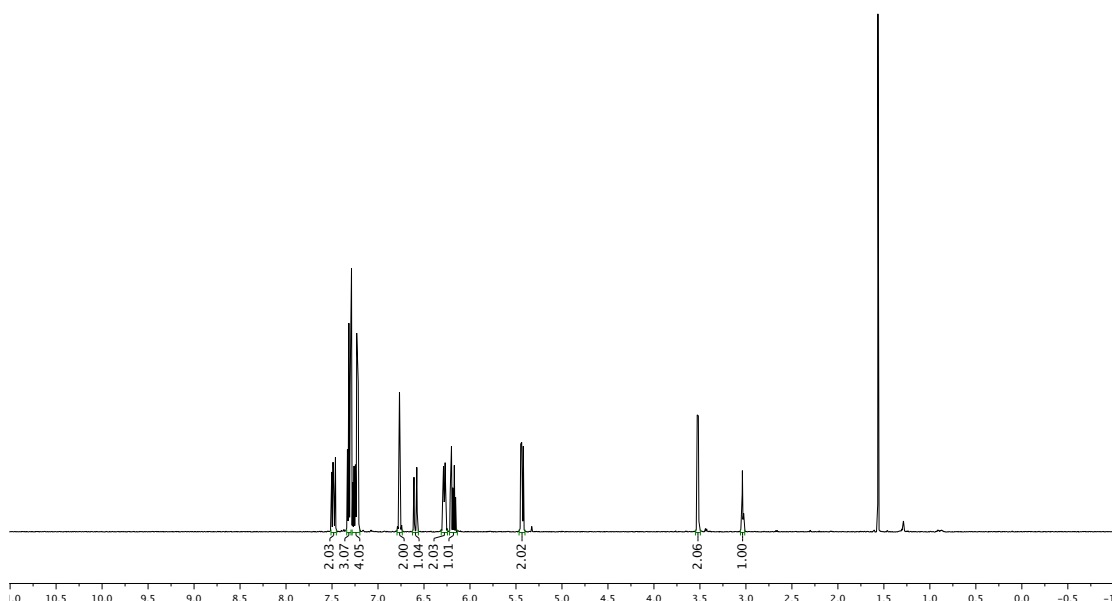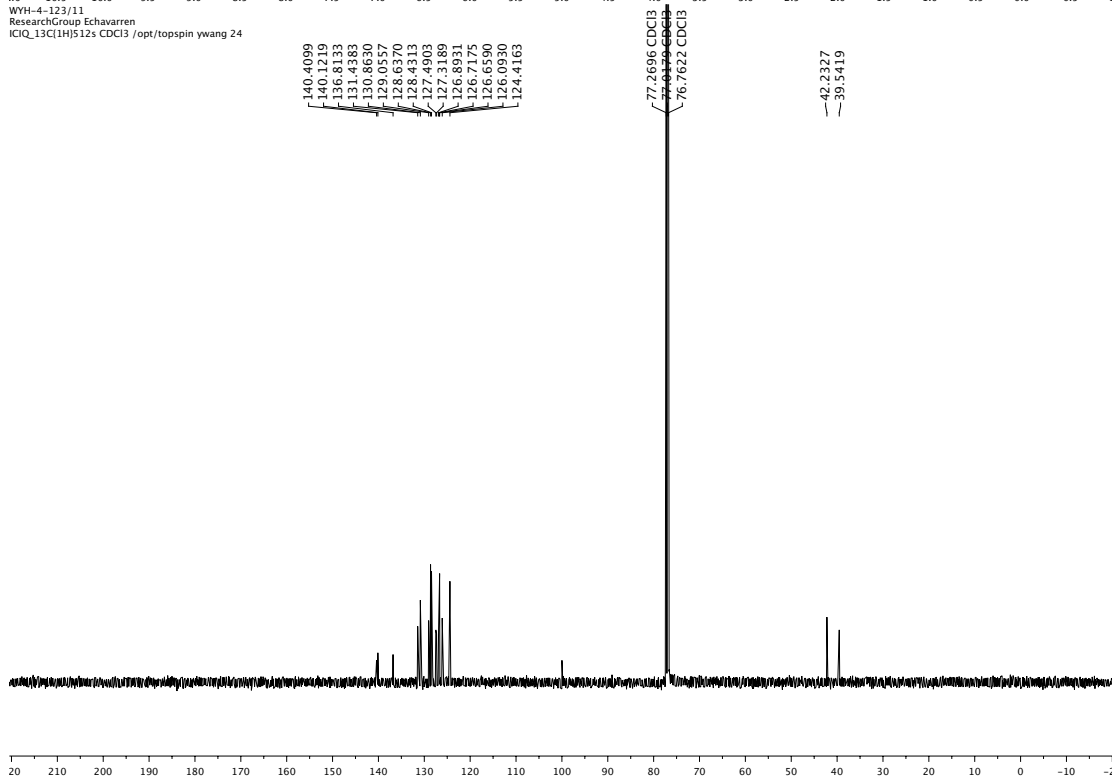

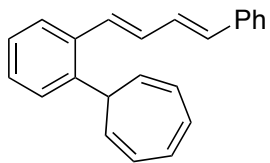

WYH-5-112/10  
 ResearchGroup Echavarren  
 ICIQ\_1H12p8s CDCI3 /opt/topspin ywang 22

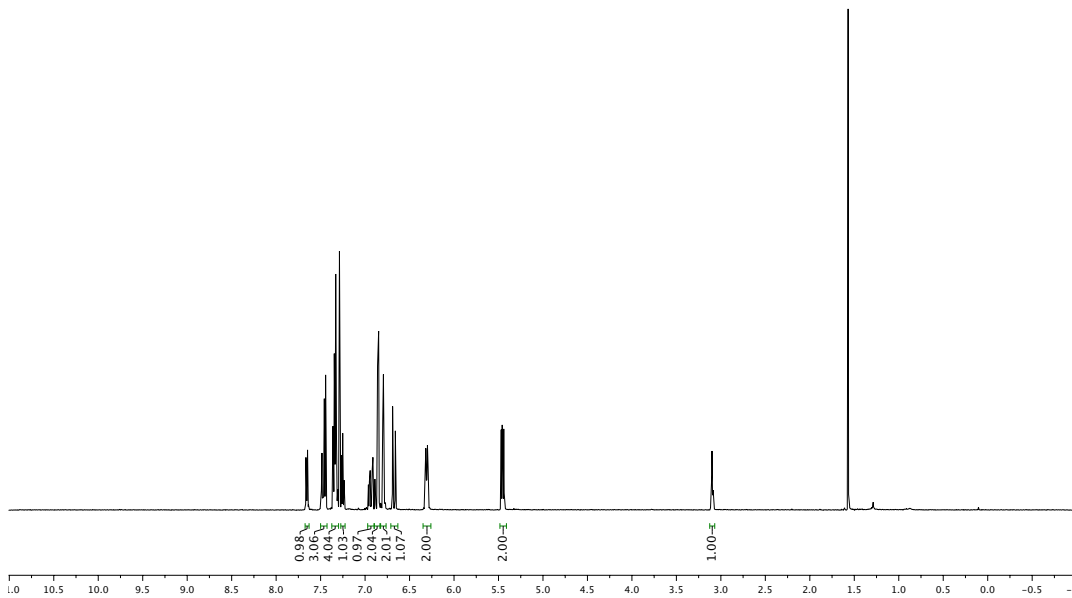

WYH-5-112/11  
 ResearchGroup Echavarren  
 ICIQ\_13C1H1512s CDCI3 /opt/topspin ywang 22

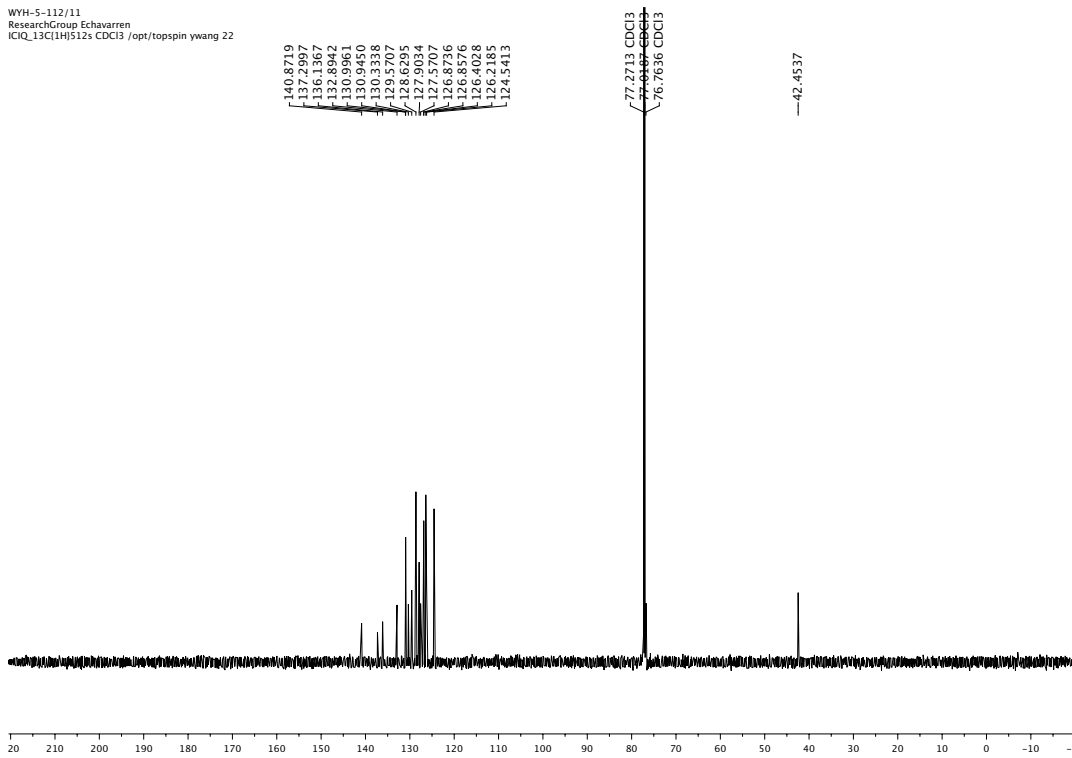

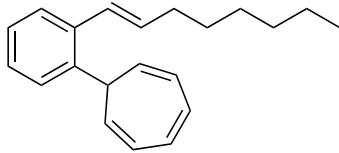

WYH-4-124/10  
 ResearchGroup Echavarren  
 ICIQ\_1H12p8s CDC13 /opt/topspin ywang 90

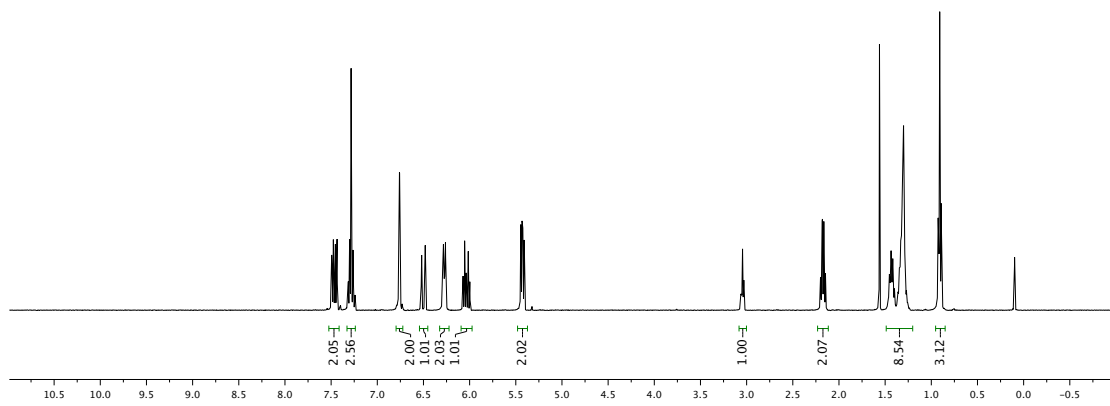

WYH-4-124/11  
 ResearchGroup Echavarren  
 ICIQ\_13C1H512s CDC13 /opt/topspin ywang 90

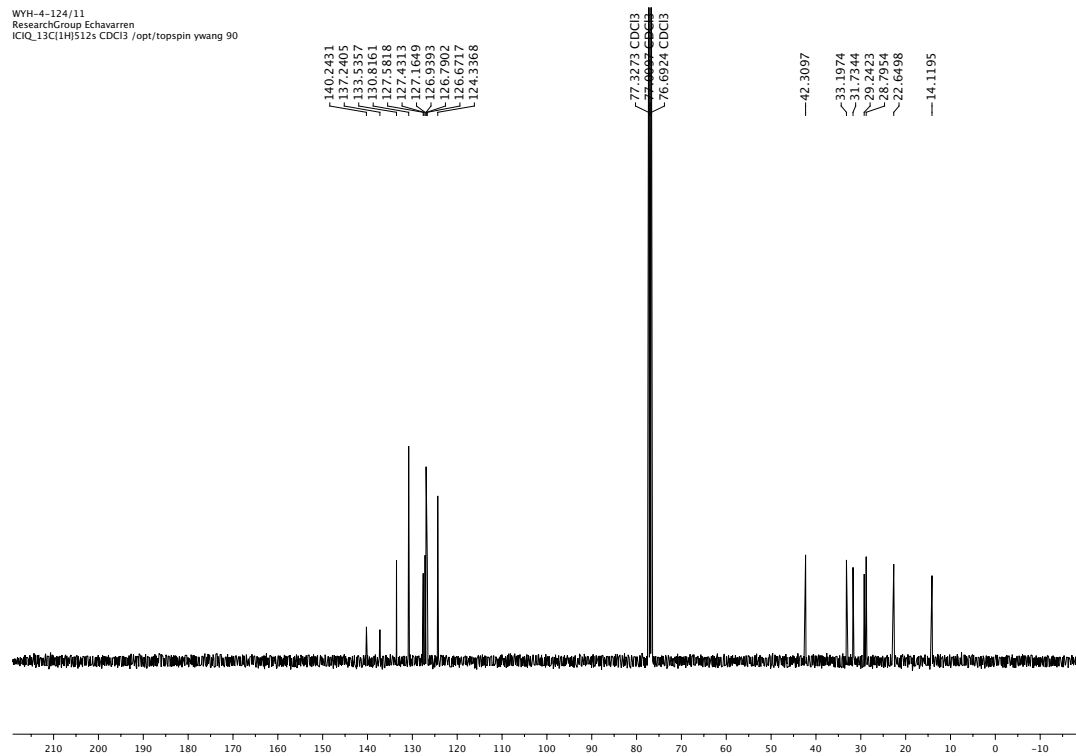

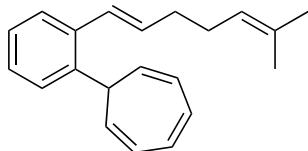

WYH-5-124/10  
 ResearchGroup Echavarren  
 ICIQ\_1H12p8s CDCl3 /opt/topspin ywang 88

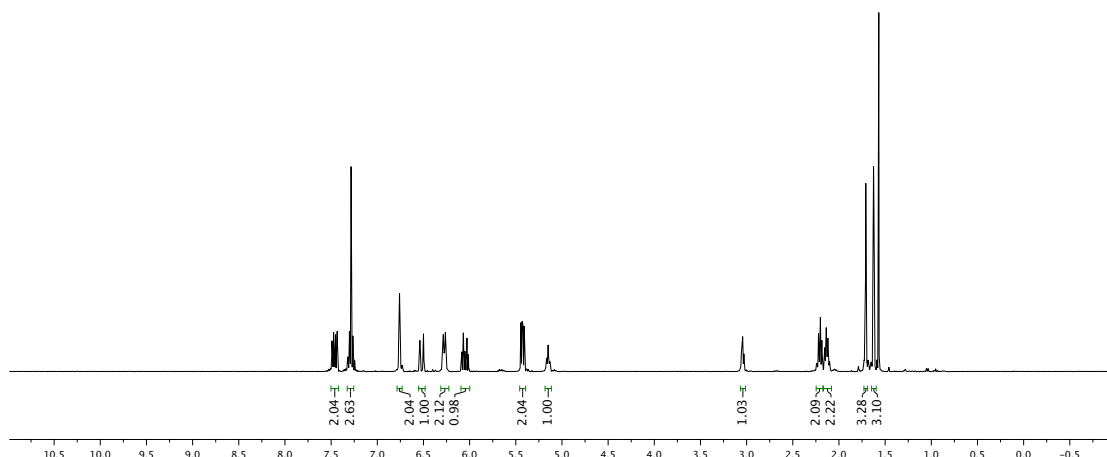

WYH-5-124/11  
 ResearchGroup Echavarren  
 ICIQ\_13C11H512s CDCl3 /opt/topspin ywang 88

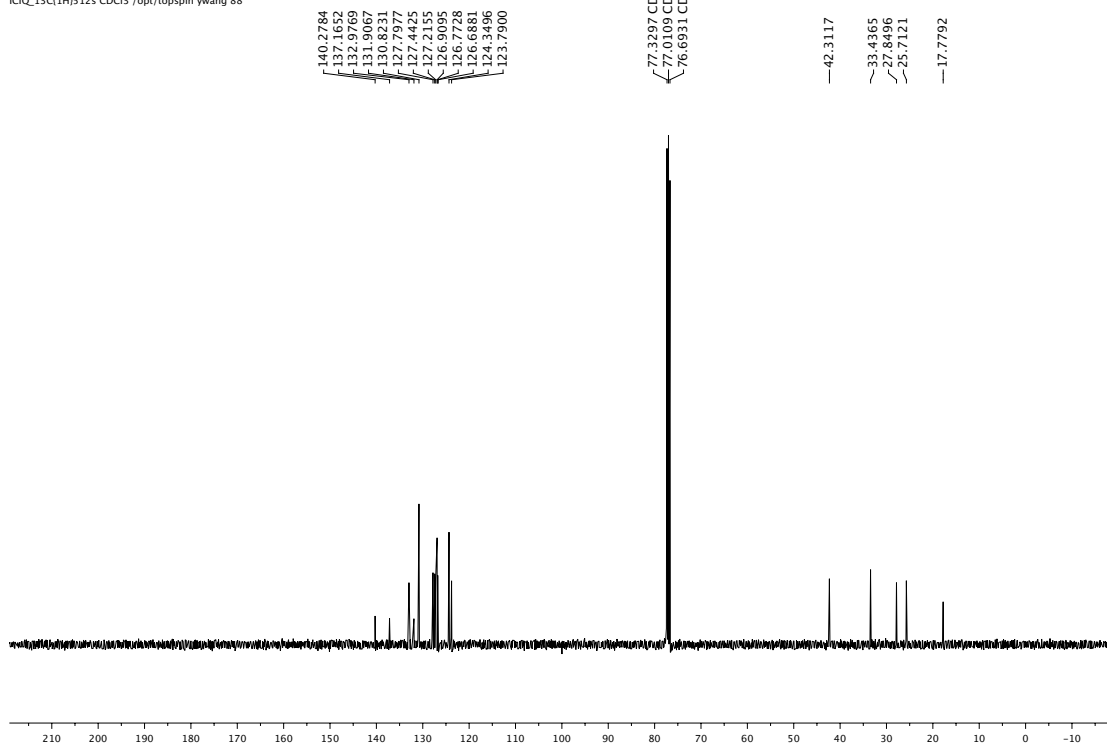

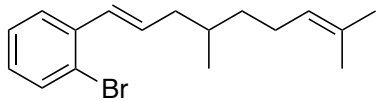

WYH-9-2-10.fid  
 ResearchGroup Echavarren  
 ICIQ\_1H12p8s CDCI3 /opt/topspin ywang 73

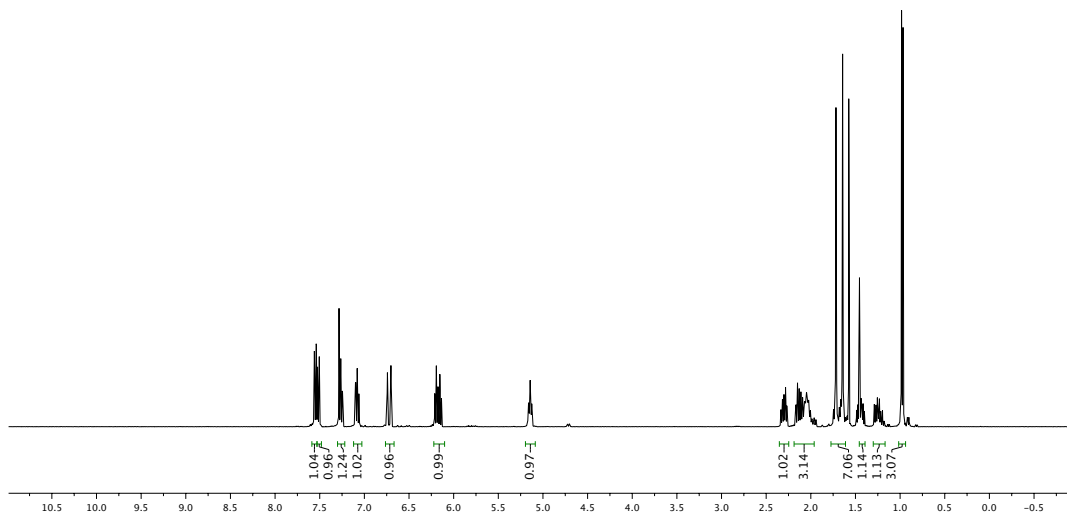

WYH-9-2-10.fid  
 ResearchGroup Echavarren  
 ICIQ\_13C1H12s CDCI3 (C:\Bruker\TopSpin3.1) ywang 13

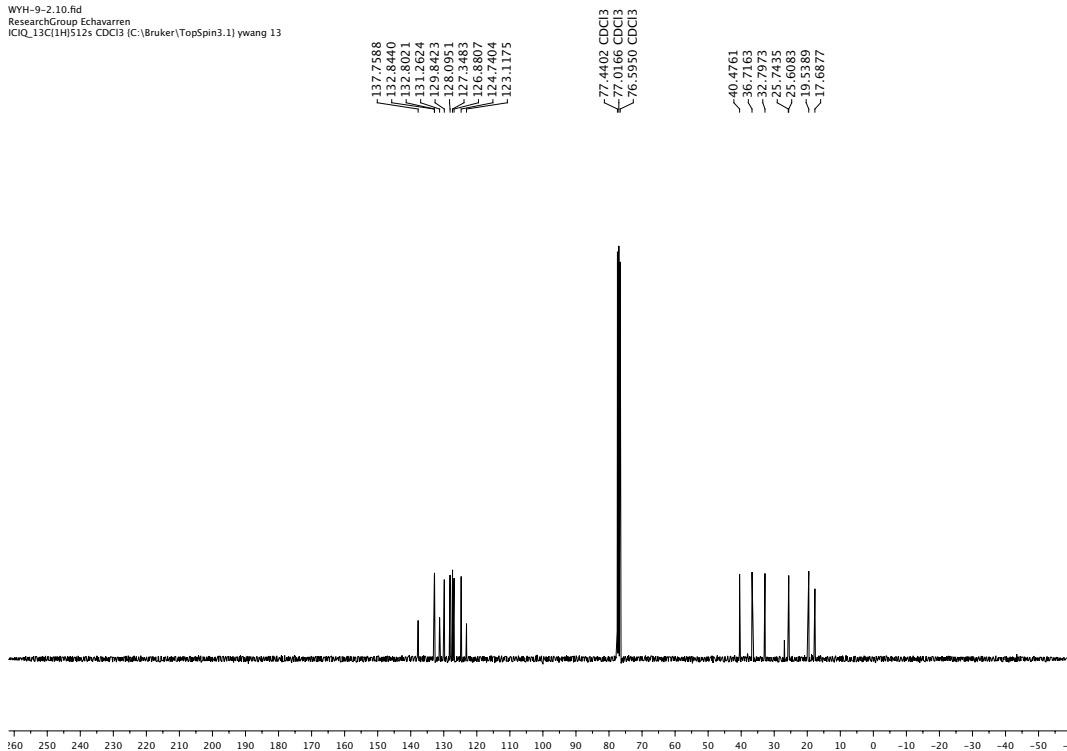

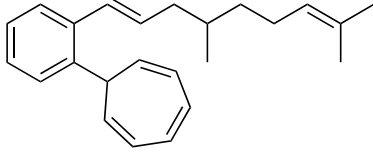

WYH-9-6\_10.fid  
 ResearchGroup Echavarren  
 ICIQ\_1H12p8s CDCl3 /opt/topspin ywang 87

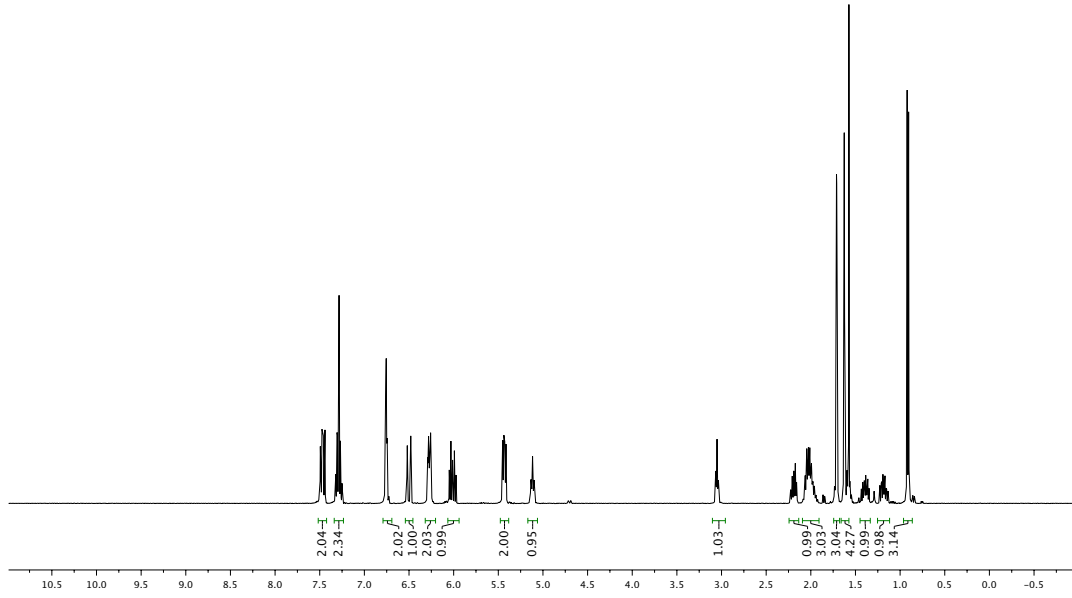

WYH-9-6\_10.fid  
 ResearchGroup Echavarren  
 ICIQ\_13C1H1512s CDCl3 (C:\Bruker\TopSpin3.1) ywang 27

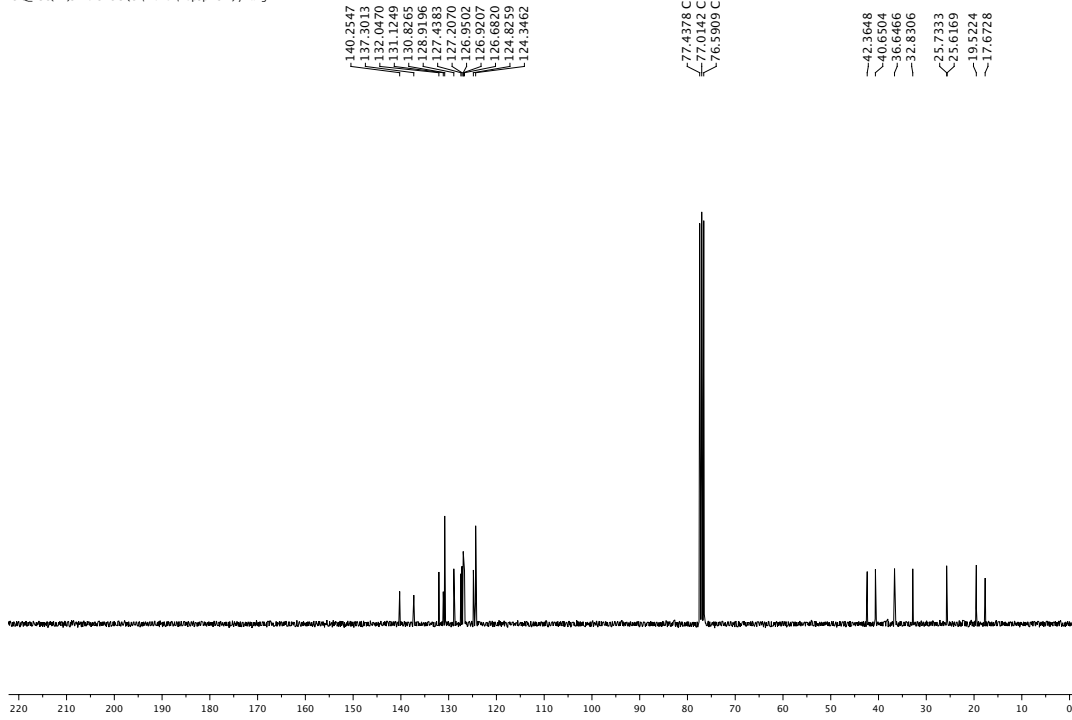

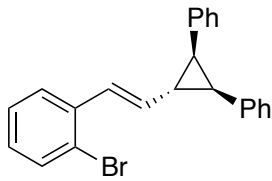

WYH-9-9-N.10.fid  
 ResearchGroup Echavarren  
 ICIQ\_1H12p8s CDCI3 /opt/topspin ywang 10

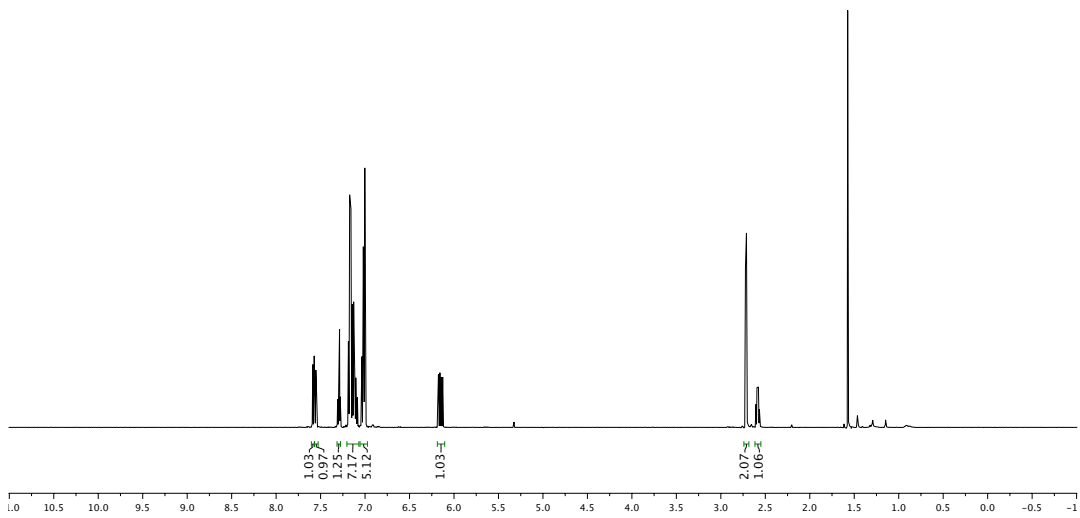

WYH-9-9-N.11.fid  
 ResearchGroup Echavarren  
 ICIQ\_13C1H1512s CDCI3 /opt/topspin ywang 10

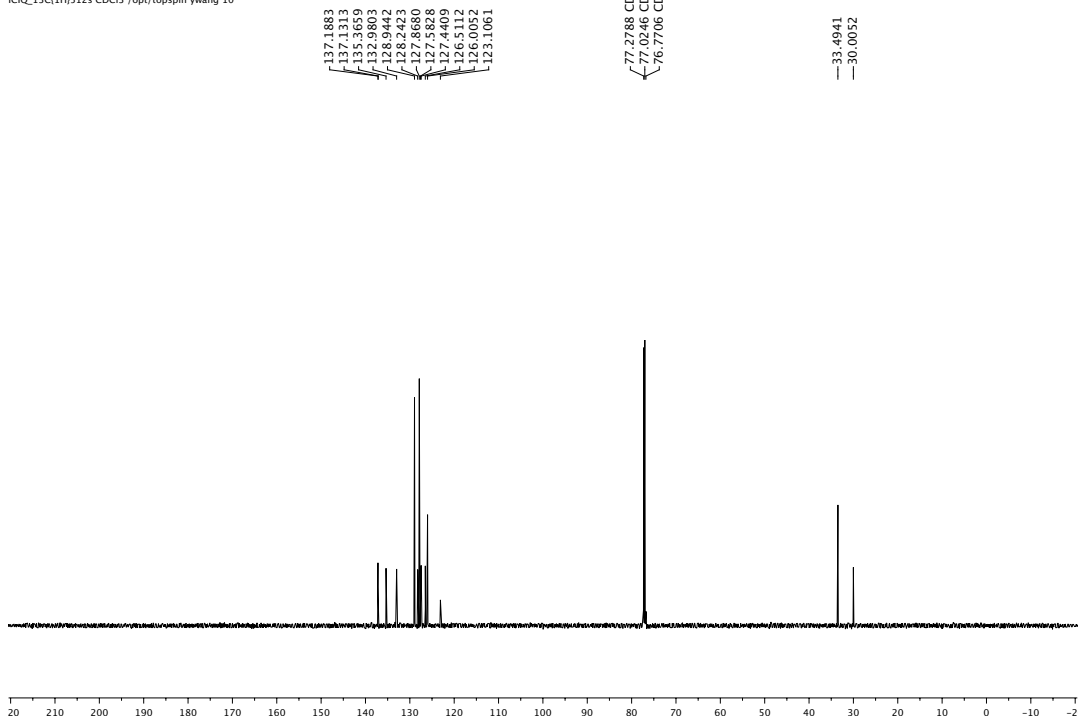



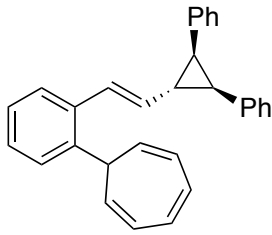

WYH-9-12-N.10.fid  
 ResearchGroup Echavarren  
 ICIQ\_1H12p8s CDC13 /opt/topspin ywang 62

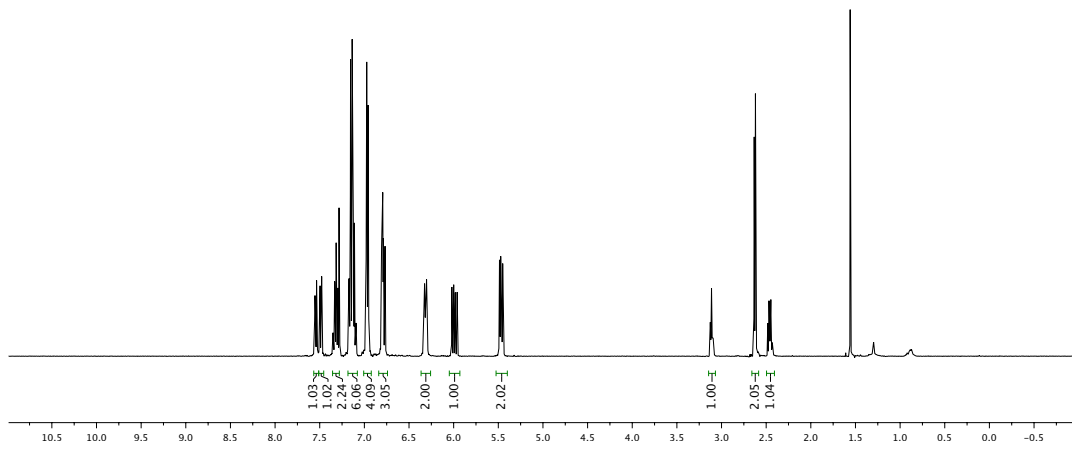

WYH-9-12-N.11.fid  
 ResearchGroup Echavarren  
 ICIQ\_13C1HJ512s CDC13 /opt/topspin ywang 62

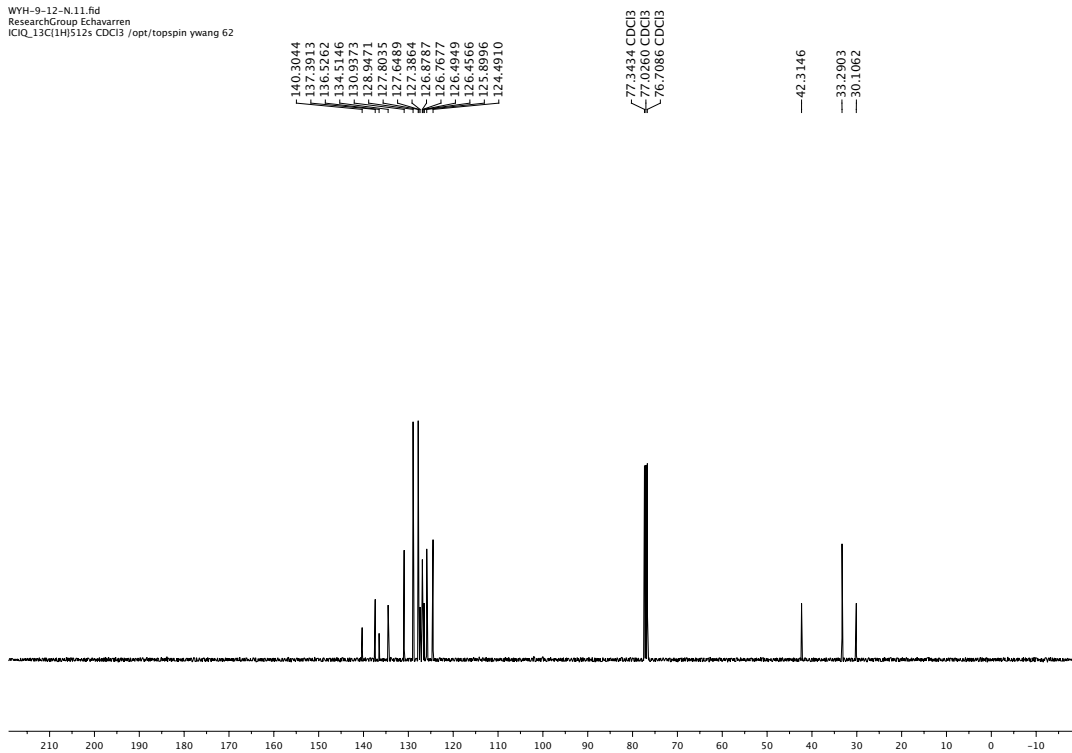

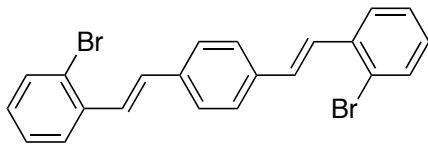

WYH-5-91-Solution/10  
 ResearchGroup Echavarren  
 ICIQ\_1H12p8s CDCl3 /opt/topspin ywng 94

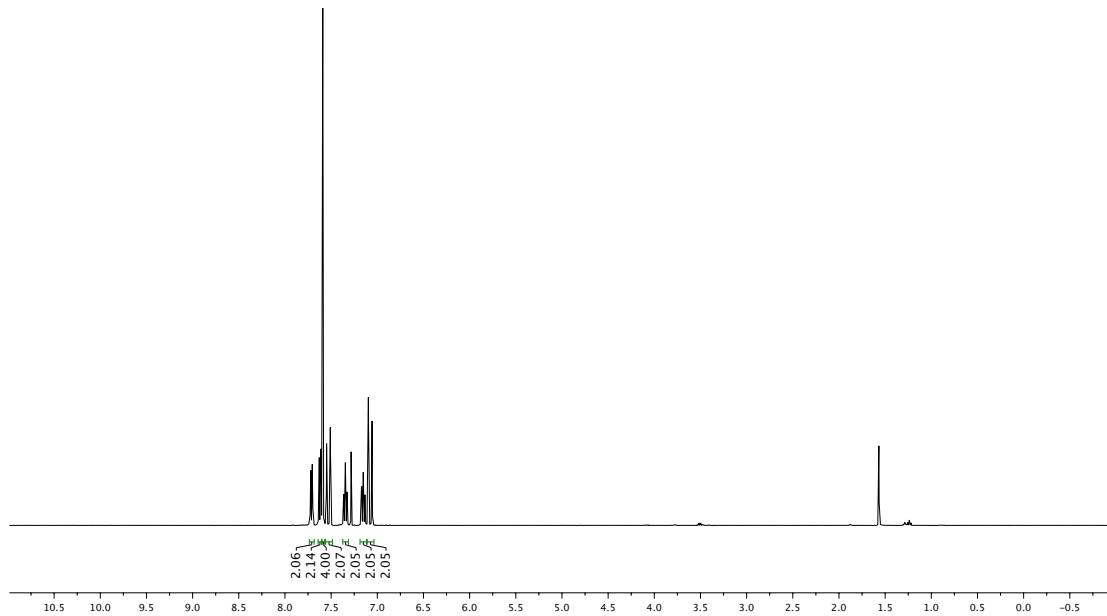

WYH-5-91-Solution/11  
 ResearchGroup Echavarren  
 ICIQ\_13C11H12s CDCl3 /opt/topspin ywng 94

137.0582  
 136.8249  
 133.1279  
 130.9174  
 128.8504  
 127.9636  
 127.2291  
 126.8119  
 124.2114

77.3315 CDCl3  
 77.0164 CDCl3  
 76.6969 CDCl3

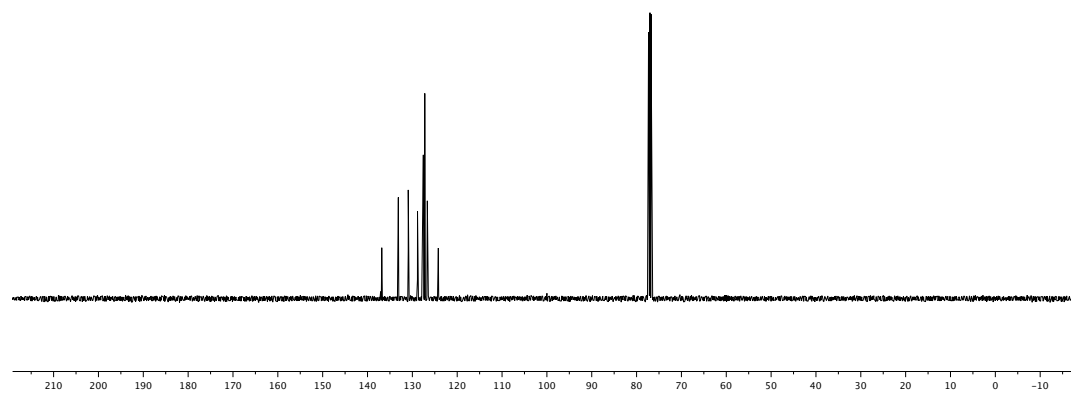

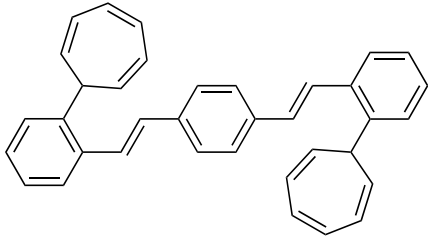

WYH-5-96-F/10  
 ResearchGroup Echavarren  
 ICIQ\_1H12p8s CDCI3 /opt/topspin ywang 85

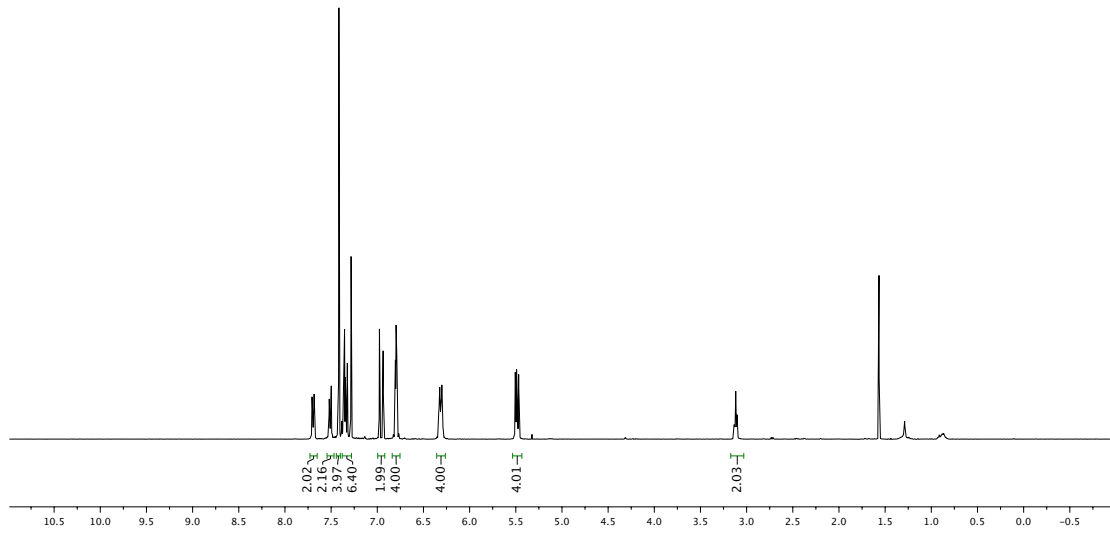

WYH-5-96-F/11  
 ResearchGroup Echavarren  
 ICIQ\_13C14H512s CDCI3 /opt/topspin ywang 85

141.0342  
 136.5700  
 133.7700  
 130.9709  
 130.1170  
 127.9662  
 127.7672  
 126.9451  
 126.8664  
 126.6494  
 126.5247  
 126.4949  
 124.5556

77.3372 CDCI3  
 77.0188 CDCI3  
 76.7037 CDCI3

42.6252

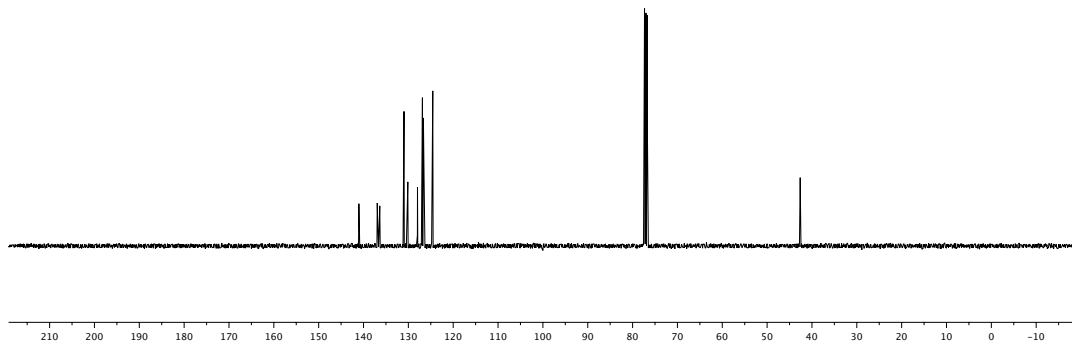

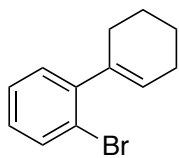

WYH-5-90/10  
 ResearchGroup Echavarren  
 ICIQ\_1H12p8s CDC13 /opt/topspin ywang 117

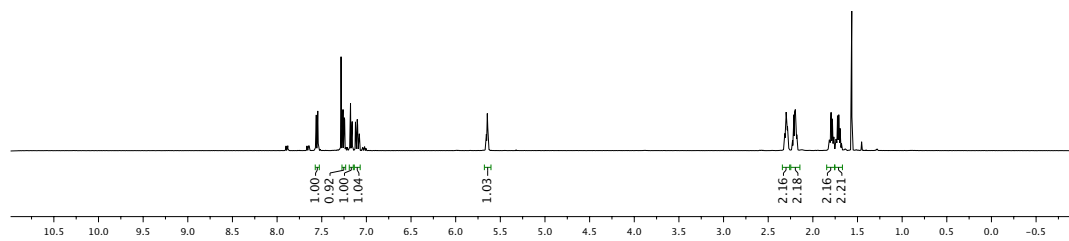

WYH-5-90/11  
 ResearchGroup Echavarren  
 ICIQ\_13C1HJ512s CDC13 /opt/topspin ywang 117

145.4433  
 139.1507  
 132.6067  
 130.0884  
 127.9158  
 127.1342  
 127.0352  
 122.5770

77.3264 CDC13  
 77.0085 CDC13  
 76.6910 CDC13

29.3485  
 25.2965  
 22.8403  
 21.9889

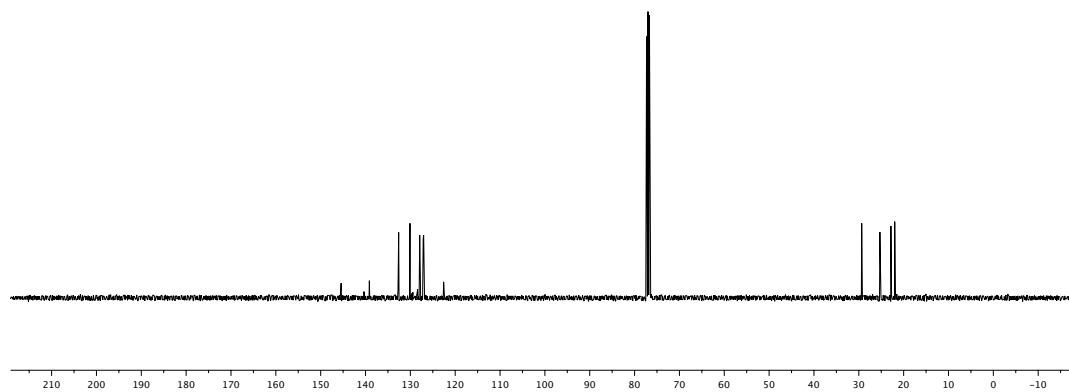

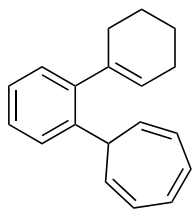

WYH-5-94/10  
 ResearchGroup Echavarren  
 ICIQ\_1H12p8s CDCI3 /opt/topspin ywang 103

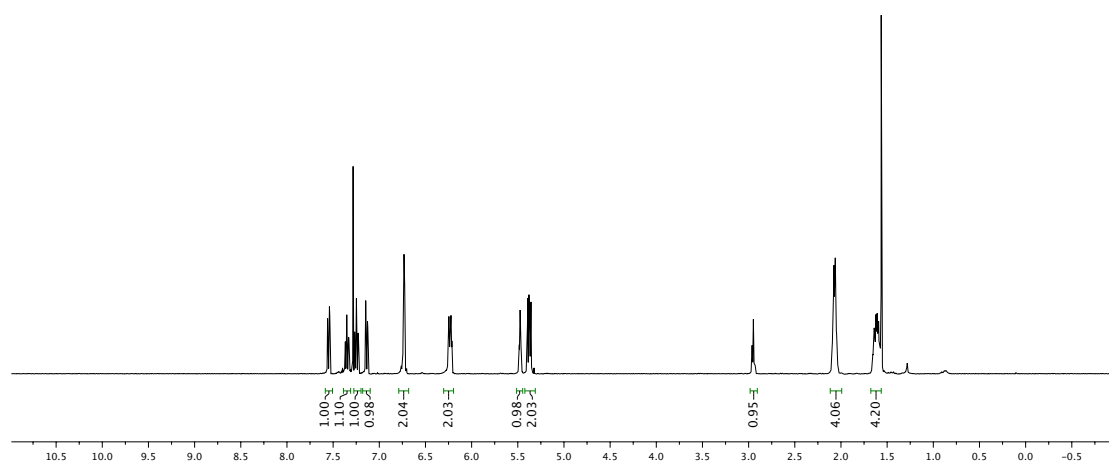

WYH-5-94/11  
 ResearchGroup Echavarren  
 ICIQ\_13C1H1512s CDCI3 /opt/topspin ywang 103

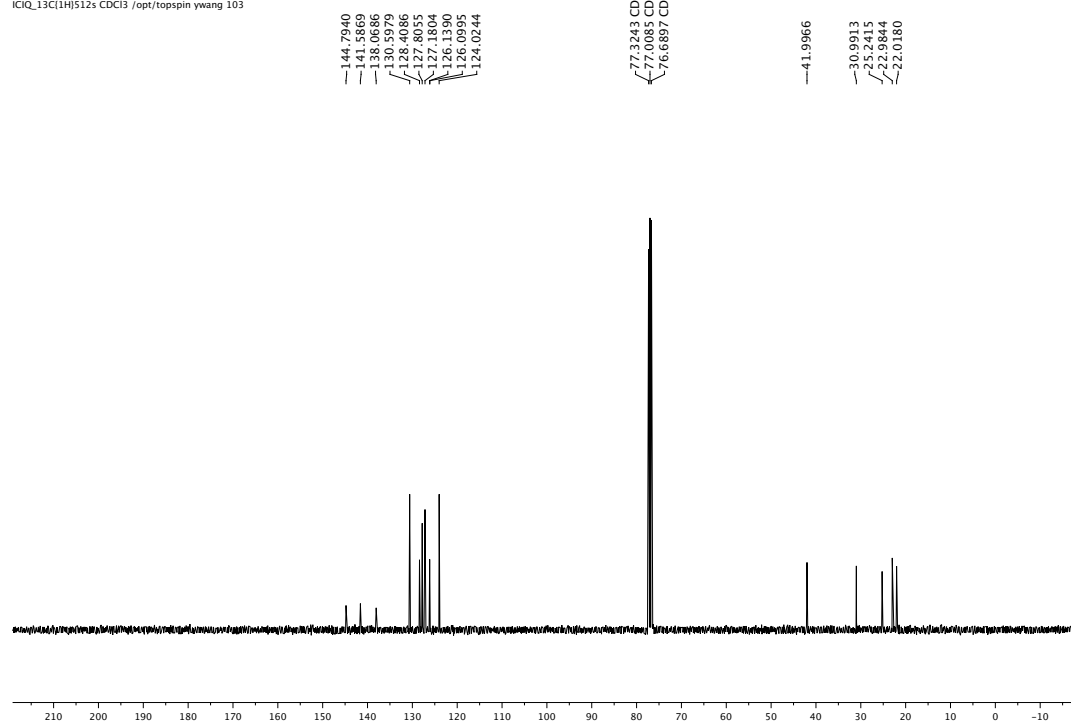

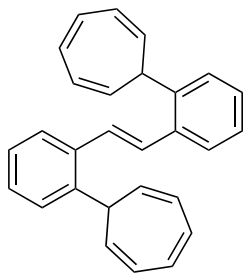

WYH-4-141.1.fid  
 ResearchGroup Echavarren  
 ICIQ\_1H20p8s CDCl3 [C:\Bruker\TopSpin3.1] ywang 48

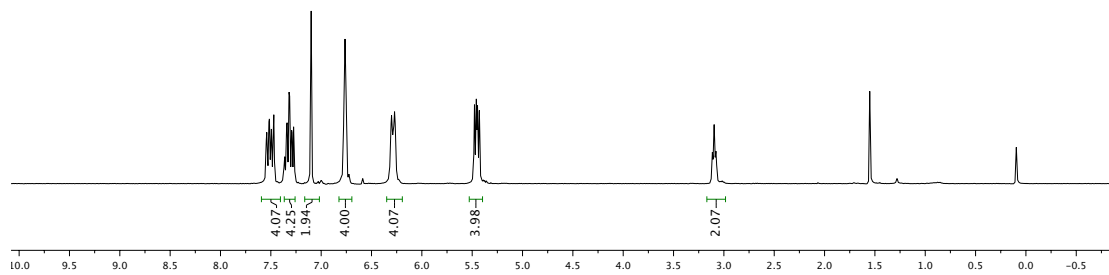

WYH-4-141.2.fid  
 ResearchGroup Echavarren  
 ICIQ\_13C(1H)512s CDCl3 [C:\Bruker\TopSpin3.1] ywang 48

141.0406  
 136.6938  
 130.9398  
 128.5758  
 127.9222  
 127.6130  
 126.9237  
 126.7733  
 126.5853  
 124.3378

77.4336 CDCl3  
 77.0104 CDCl3  
 76.5876 CDCl3

42.4699

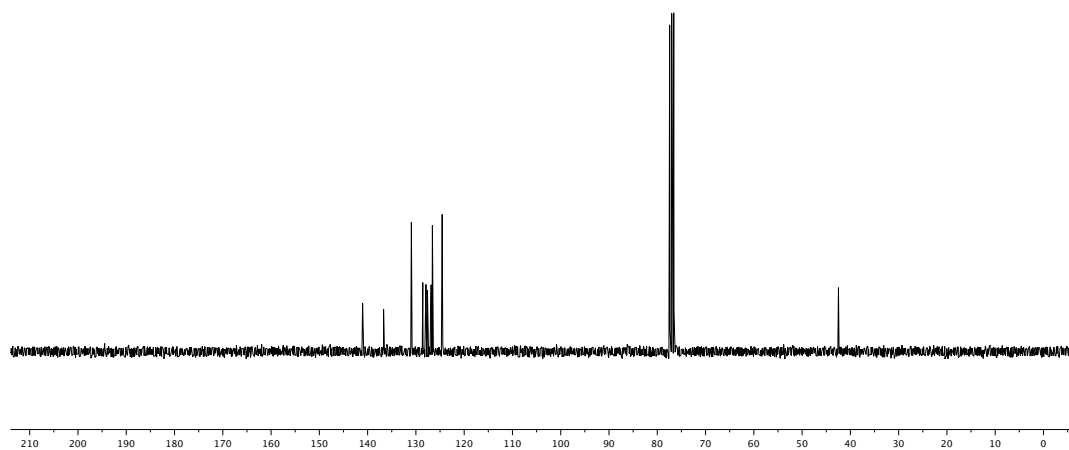

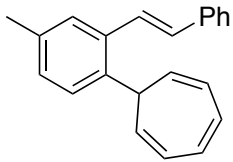

WYH-5-109-N/10  
 ResearchGroup Echavarren  
 ICIQ\_1H12p8s CDCI3 /opt/topspin ywang 104

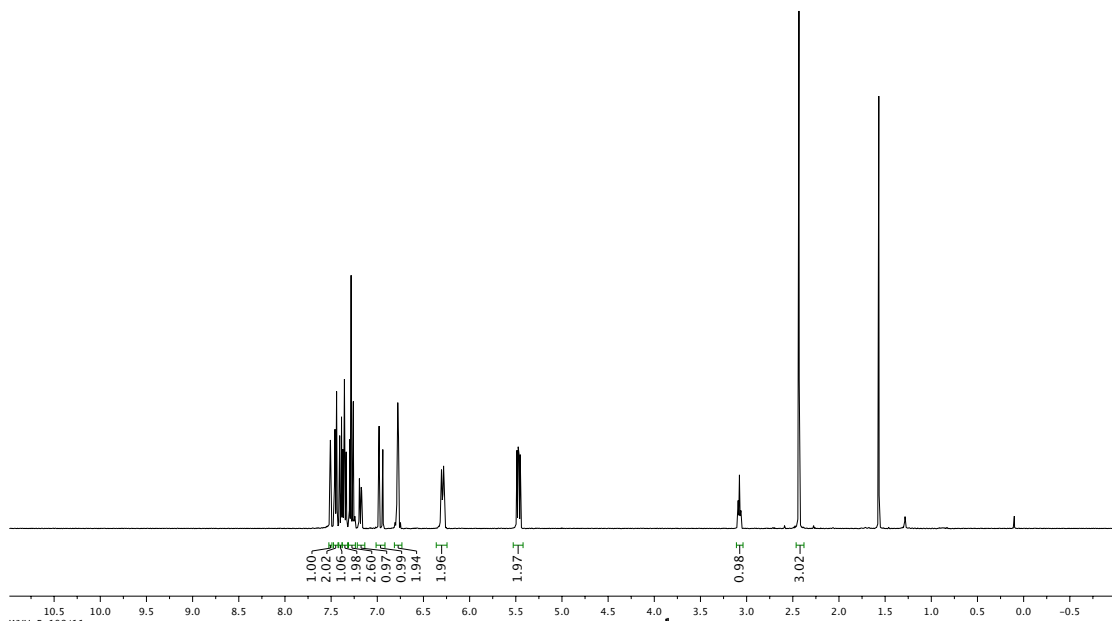

WYH-5-109/11  
 ResearchGroup Echavarren  
 ICIQ\_13C1HJ512s CDCI3 /opt/topspin ywang 33

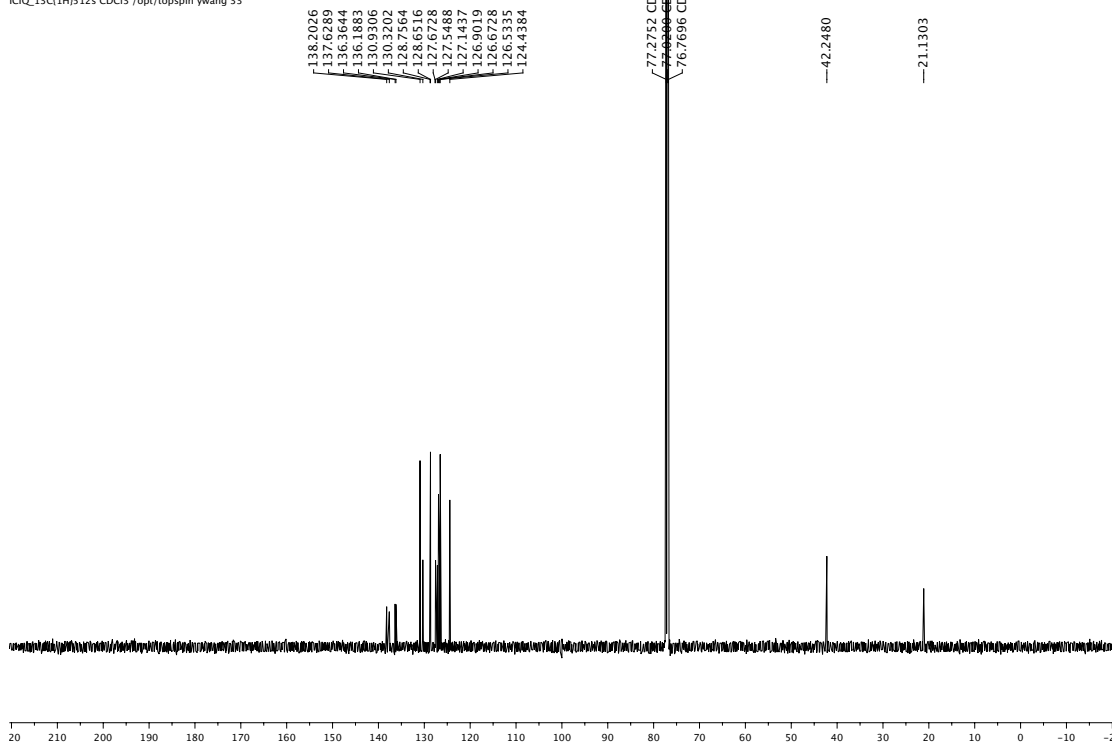

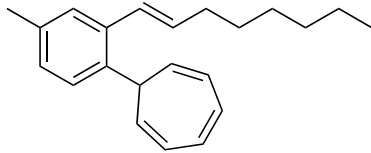

WYH-9-72.10.fid  
 ResearchGroup Echavarren  
 ICIQ\_1H12p8s CDCl3 /opt/topspin ywang 97

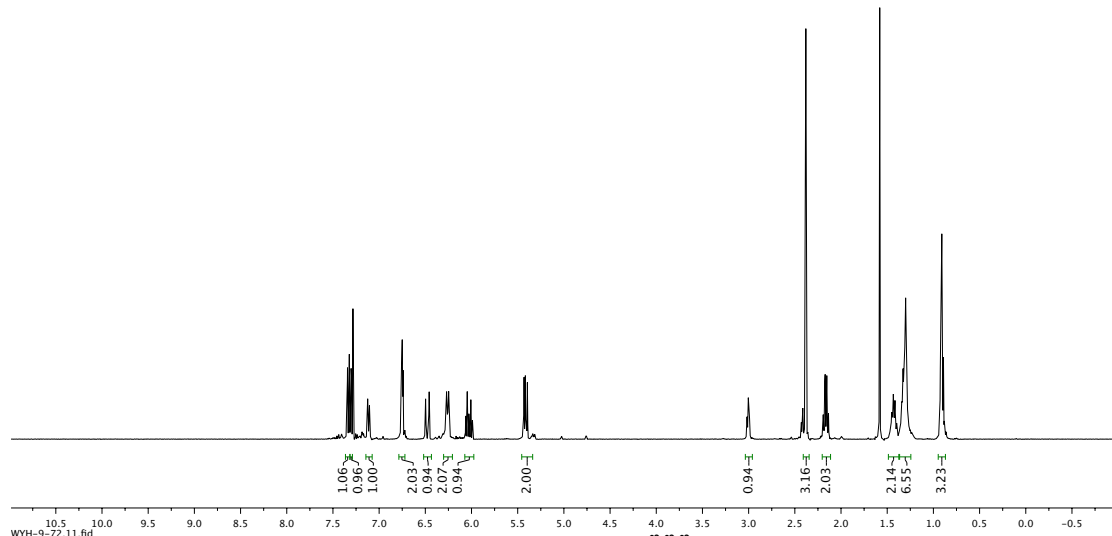

WYH-9-72.11.fid  
 ResearchGroup Echavarren  
 ICIQ\_13C1H1512s CDCl3 /opt/topspin ywang 97

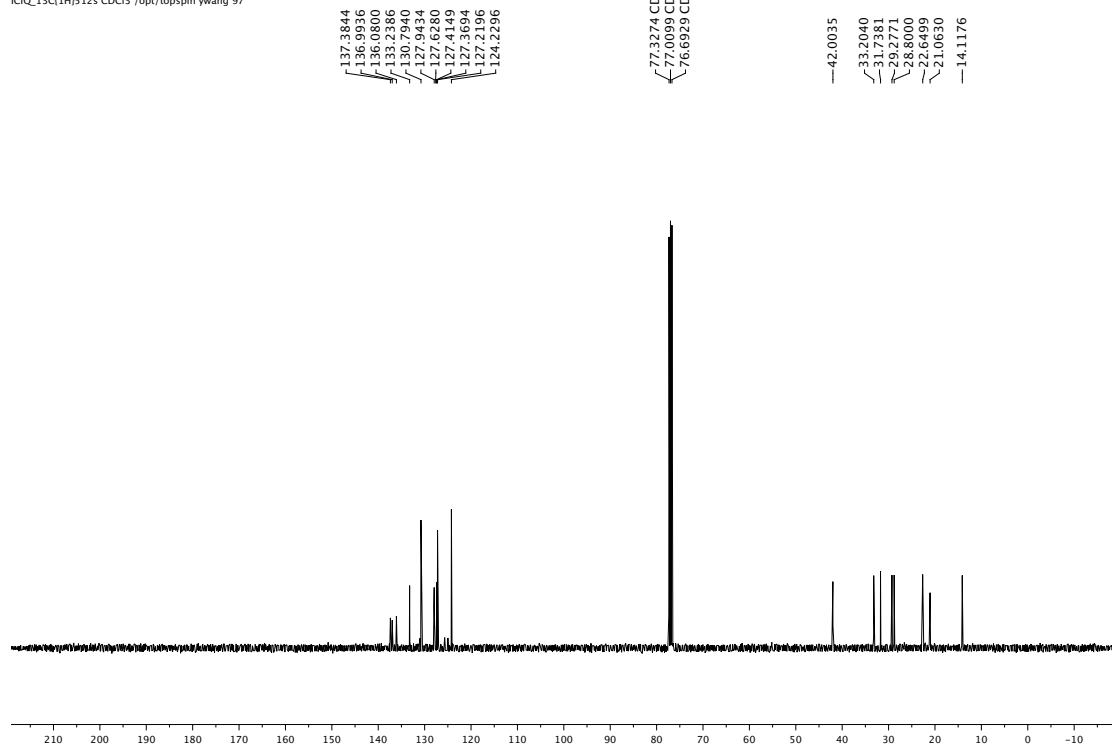



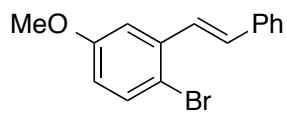

WYH-5-111.10.fid  
 ResearchGroup Echavarren  
 ICIQ\_1H12p8s CDC13 /opt/topspin ywang 35

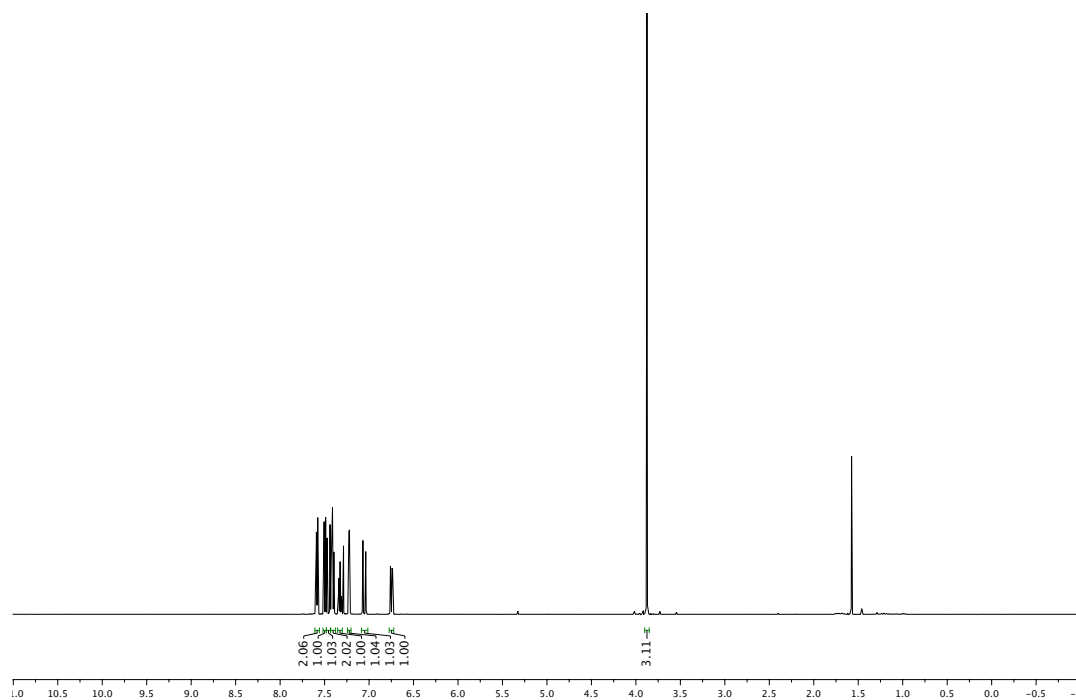

WYH-5-111.11.fid  
 ResearchGroup Echavarren  
 ICIQ\_13C1HJ512s CDC13 /opt/topspin ywang 35

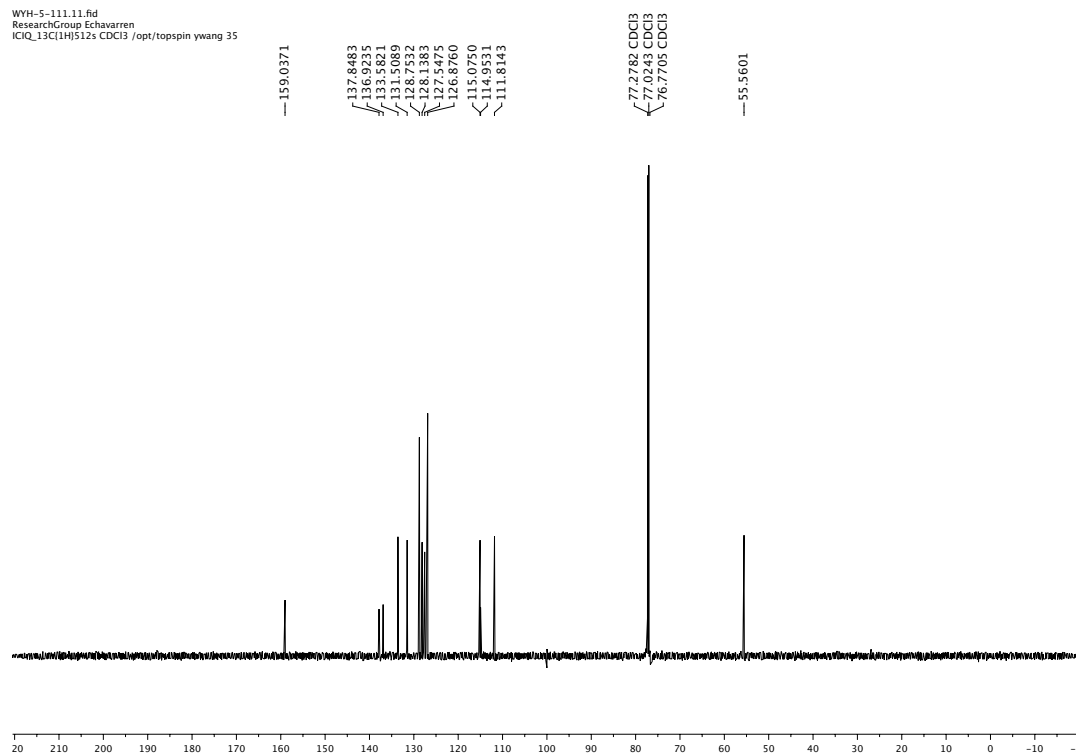

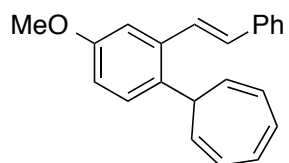

WYH-5-113-FF.10.fid  
 ResearchGroup Echavarren  
 ICIQ\_1H20p8s CDCI3 (C:\Bruker\TopSpin3.1) ywang 33

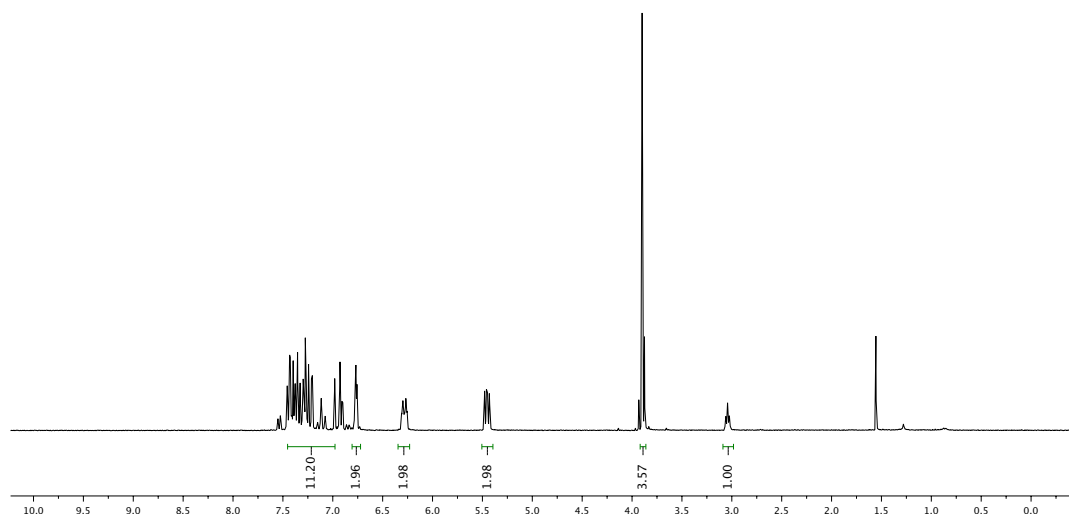

WYH-5-113-FF.11.fid  
 ResearchGroup Echavarren  
 ICIQ\_13C1H512s CDCI3 (C:\Bruker\TopSpin3.1) ywang 33

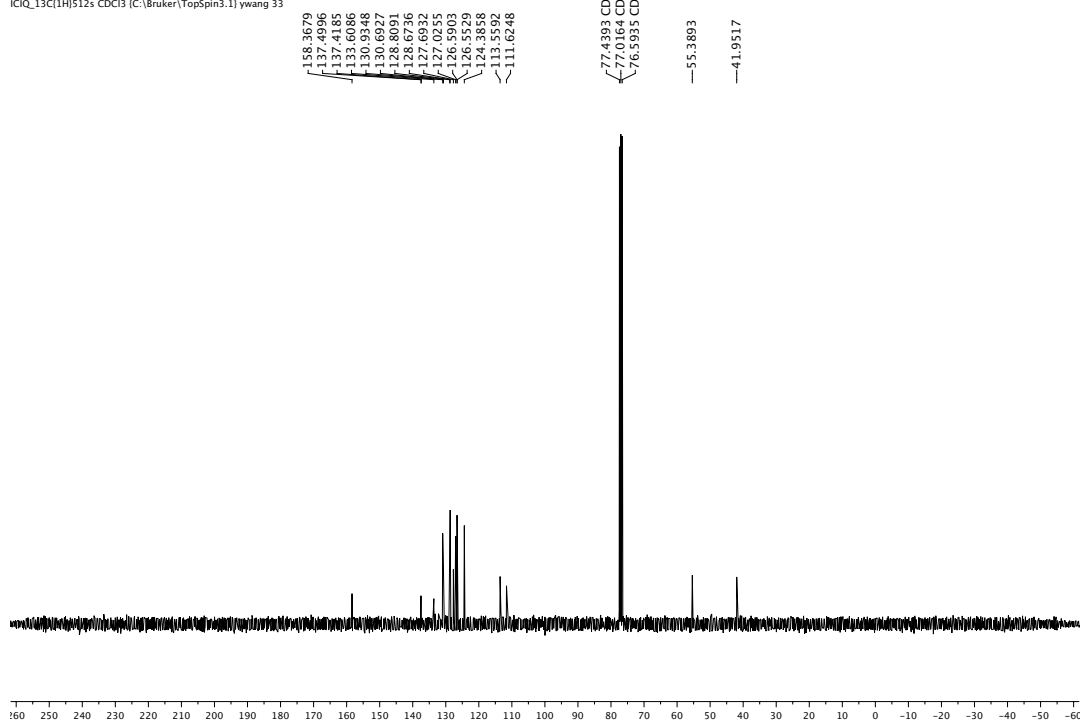

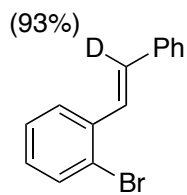

WYH-4-138/10  
 ResearchGroup Echavarren  
 ICIQ\_1H12p8s CDCl3 /opt/topspin ywang 69

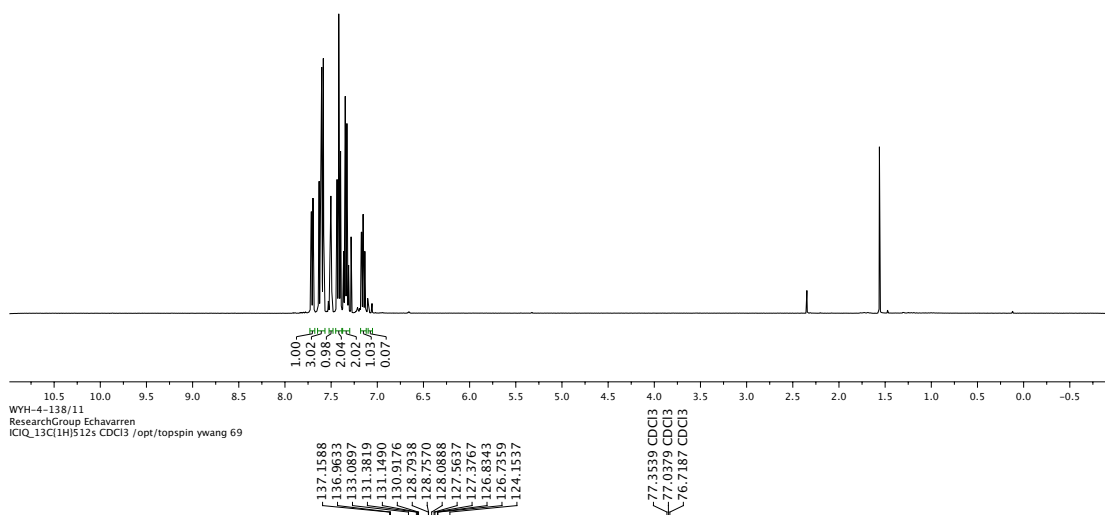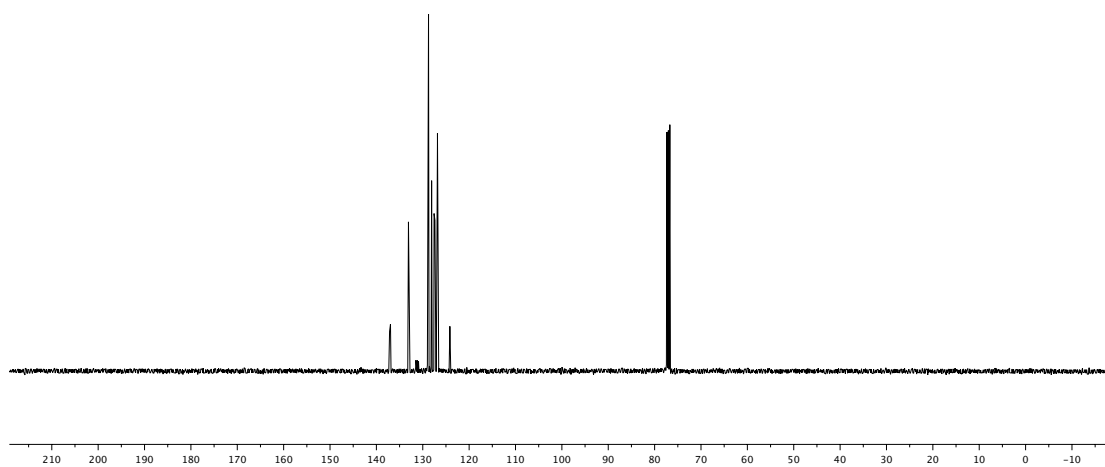



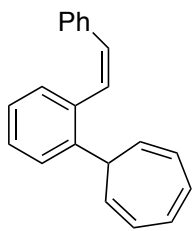

WYH-5-137/10  
 ResearchGroup Echavarren  
 ICIQ\_1H12p8s CDCI3 /opt/topspin ywang 115

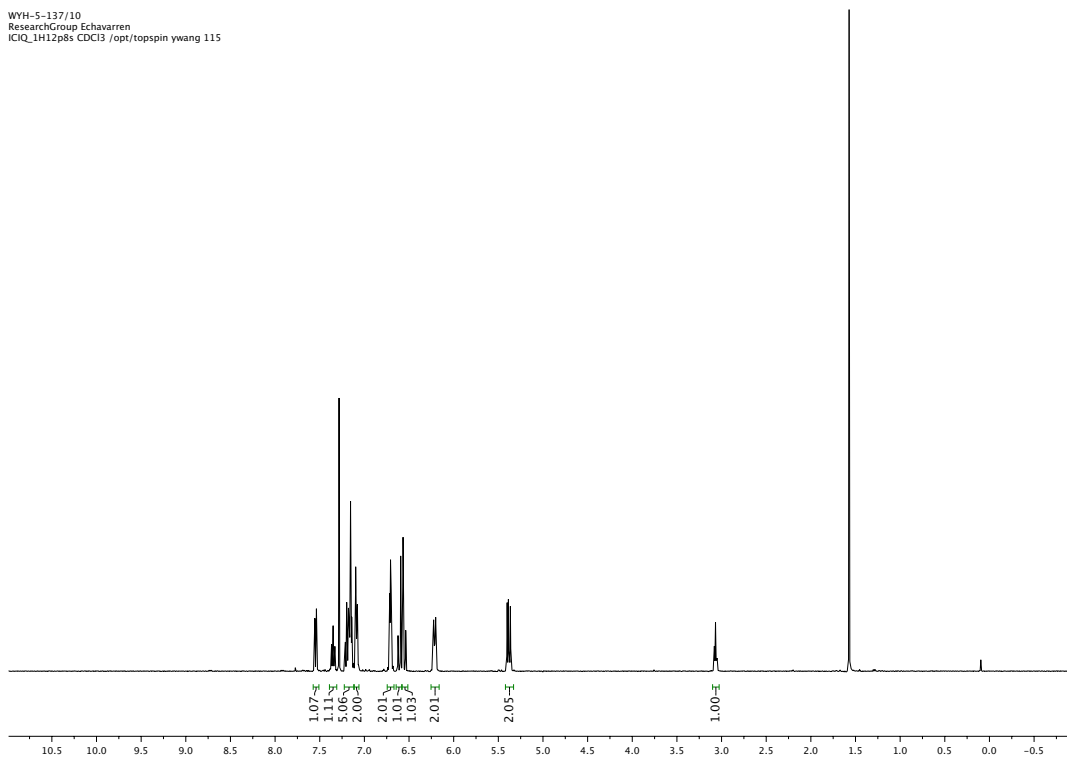

WYH-5-137/11  
 ResearchGroup Echavarren  
 ICIQ\_13C11H512s CDCI3 /opt/topspin ywang 115

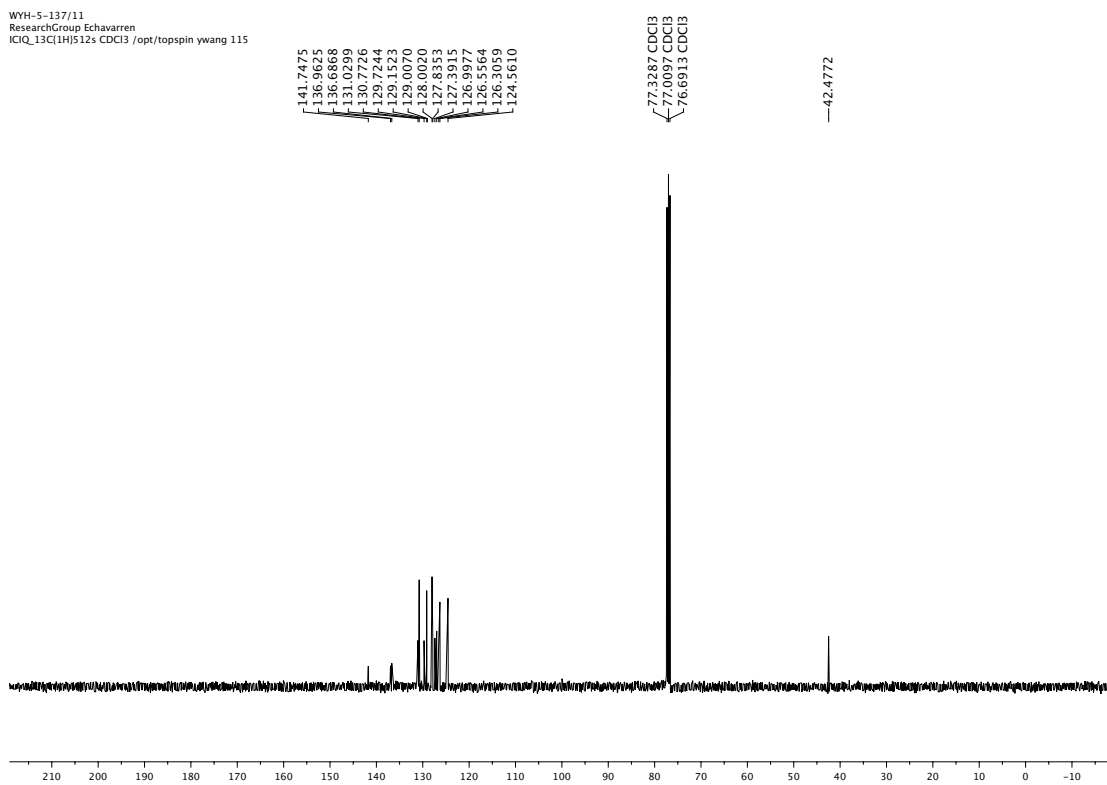

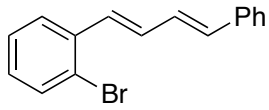

WYH-5-110.10.fid  
 ResearchGroup Echavarren  
 ICIQ\_1H12p8s CDCI3 /opt/topspin ywang 34

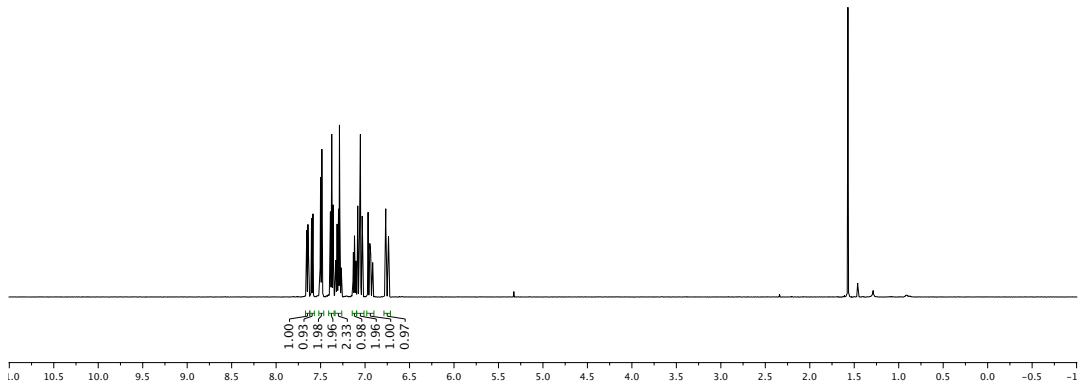

WYH-5-110.11.fid  
 ResearchGroup Echavarren  
 ICIQ\_13C1HJ512s CDCI3 /opt/topspin ywang 34

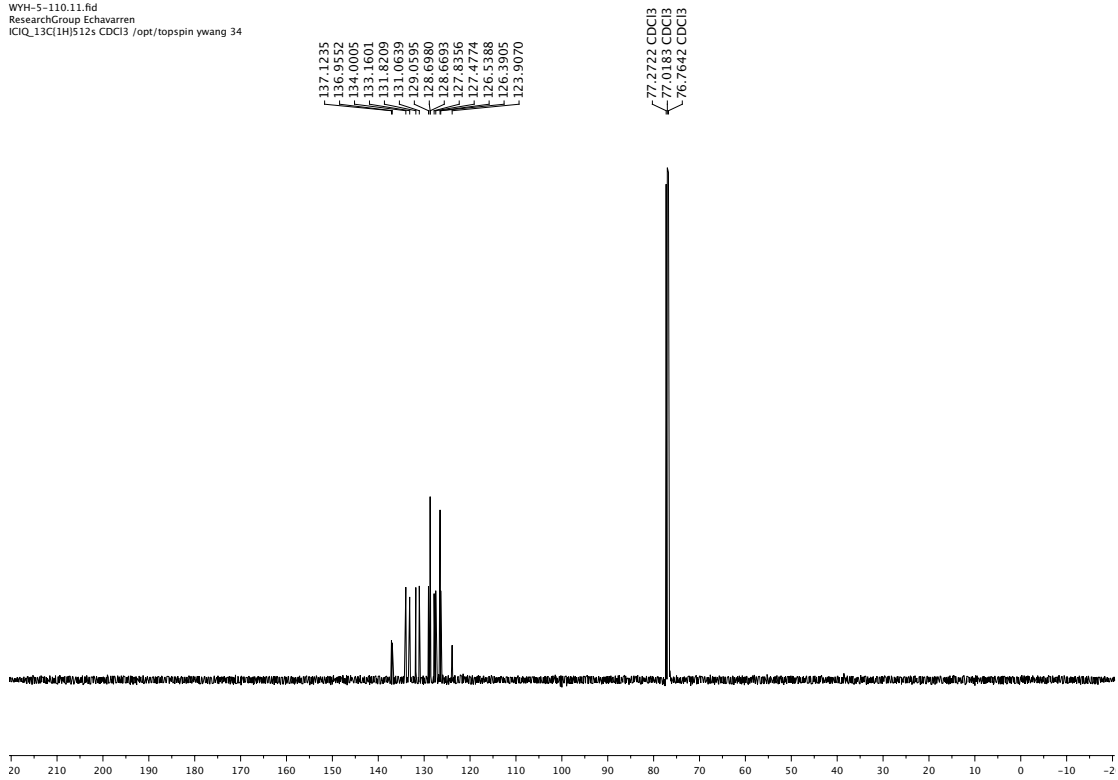

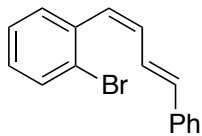

WYH-6-128.10.fid  
 ResearchGroup Schavaren  
 ICIQ\_1H12p8s CDCI3 /opt/topspin ywang 77

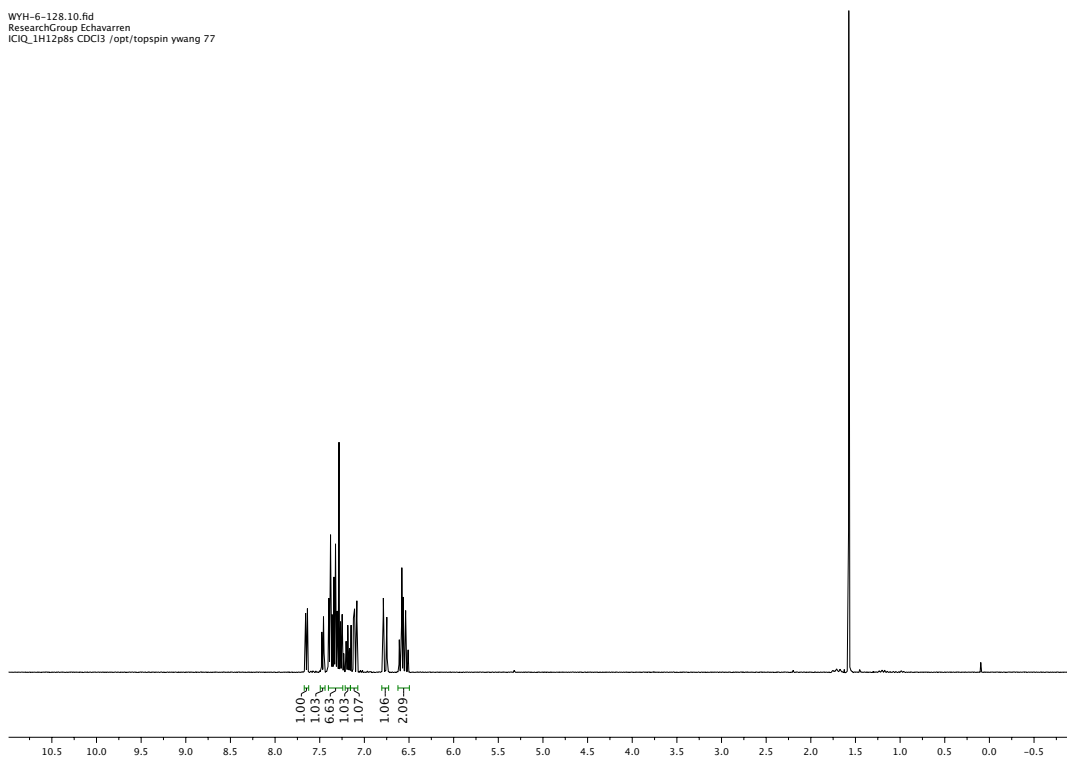

WYH-6-128.1.fid  
 13C[1H] Experiment

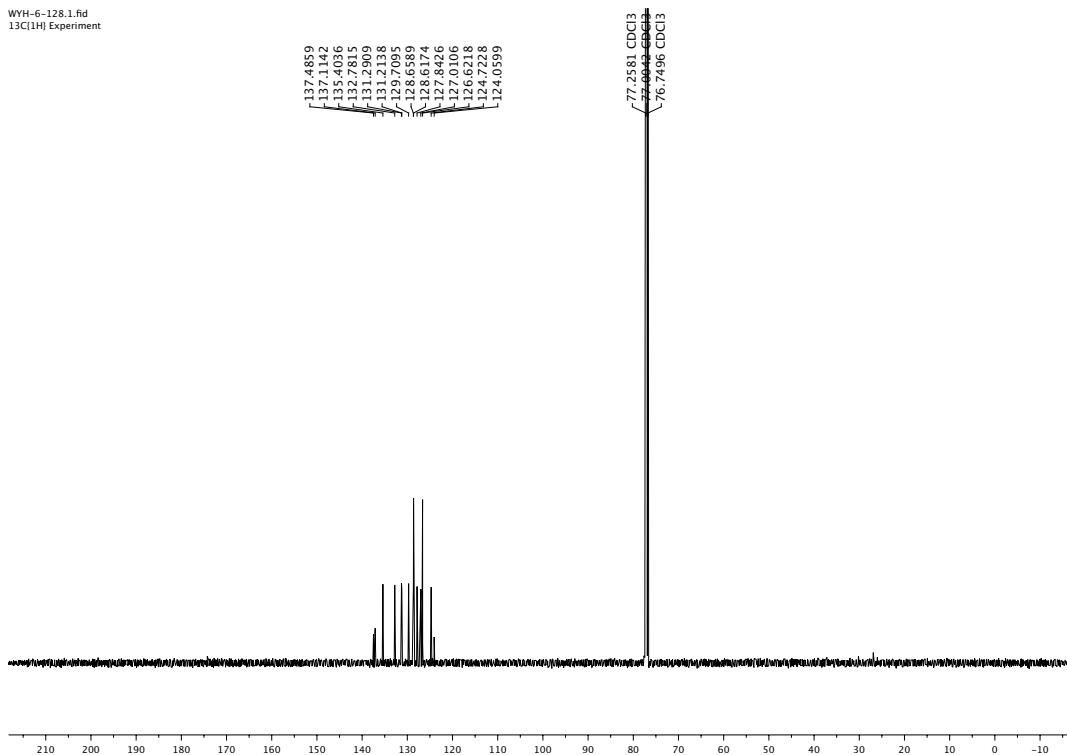

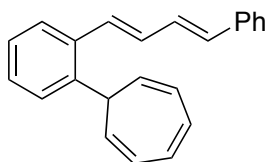

WYH-5-112/10  
 ResearchGroup Echavarren  
 ICIQ\_1H12p8s CDCI3 /opt/topspin ywang 22

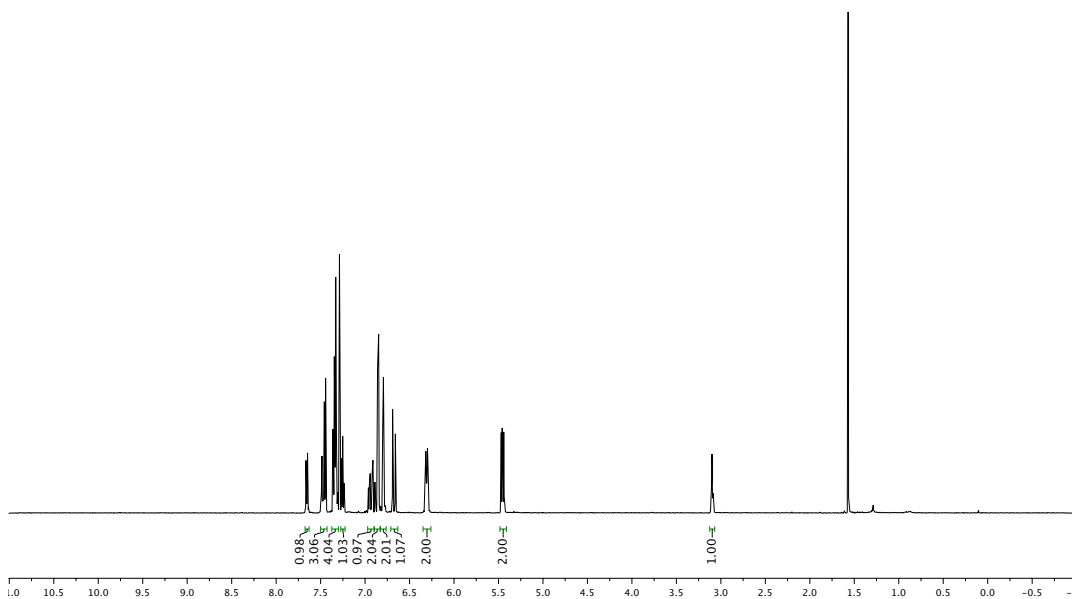

WYH-5-112/11  
 ResearchGroup Echavarren  
 ICIQ\_13C1H1512s CDCI3 /opt/topspin ywang 22

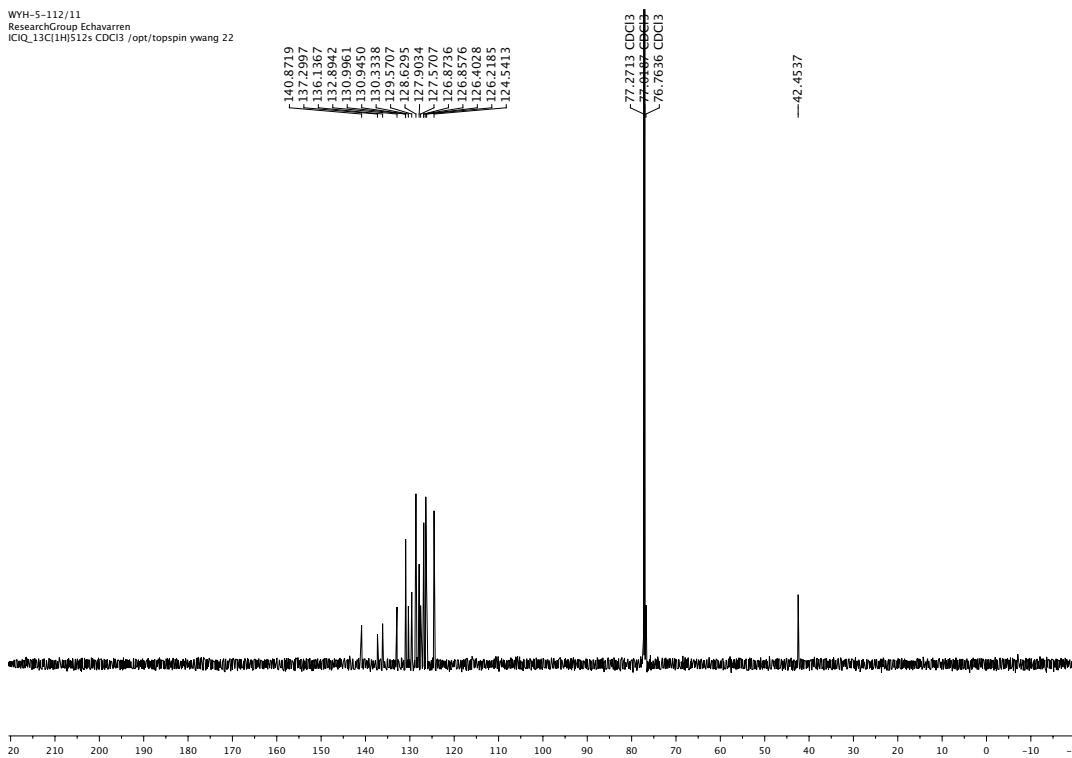



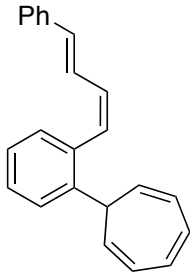

WYH-6-138-N.10.fid  
 ResearchGroup Echavarren  
 ICIQ\_1H12p8s CDCl3 /opt/topspin ywang 10

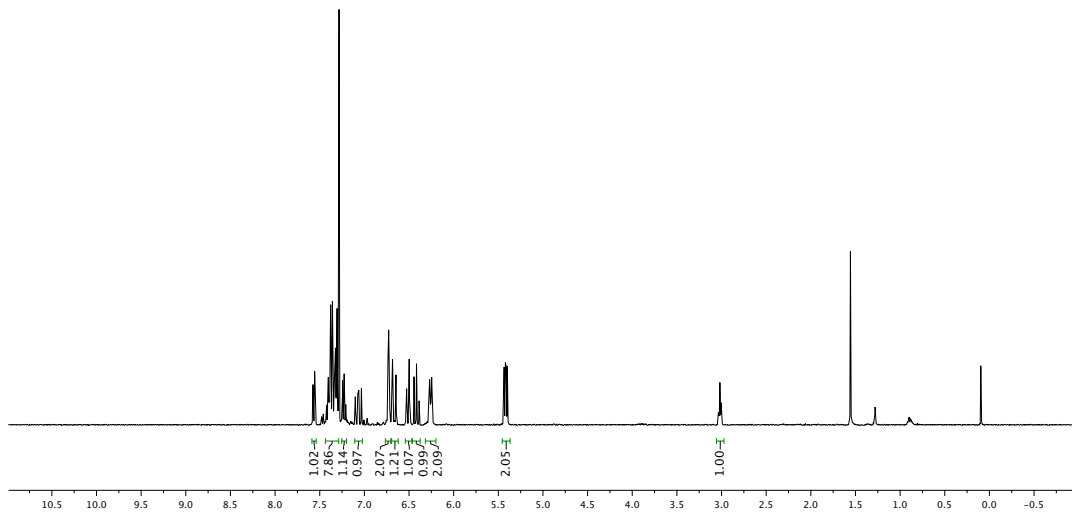

WYH-6-129-N.11.fid  
 ResearchGroup Echavarren  
 ICIQ\_13C1H1512s CDCl3 /opt/topspin ywang 75

142.0123  
 137.3008  
 134.6672  
 134.3489  
 131.0895  
 130.8421  
 130.5777  
 129.3129  
 128.5528  
 127.8957  
 127.6154  
 127.3588  
 126.5785  
 126.0104  
 125.3029  
 125.4172  
 124.6106

77.3376 CDCl3  
 77.0206 CDCl3  
 76.7031 CDCl3

42.4582

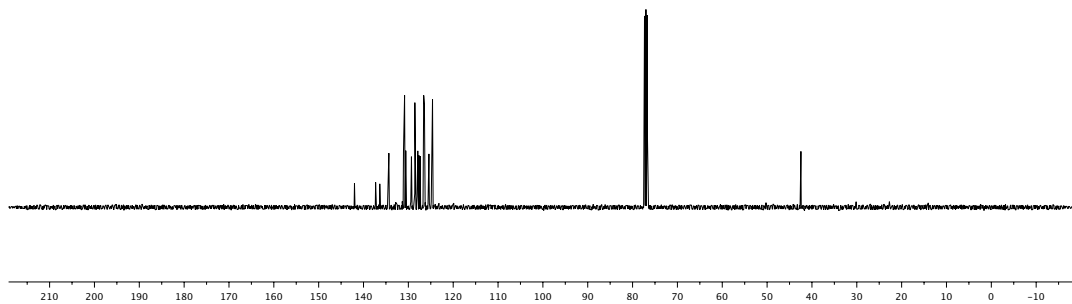

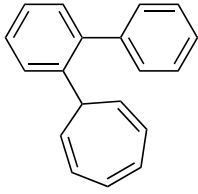

WYH-4-27-N1/10  
 ResearchGroup Echavarren  
 ICIQ\_1H12p8s CDCl3 /opt/topspin ywang 89

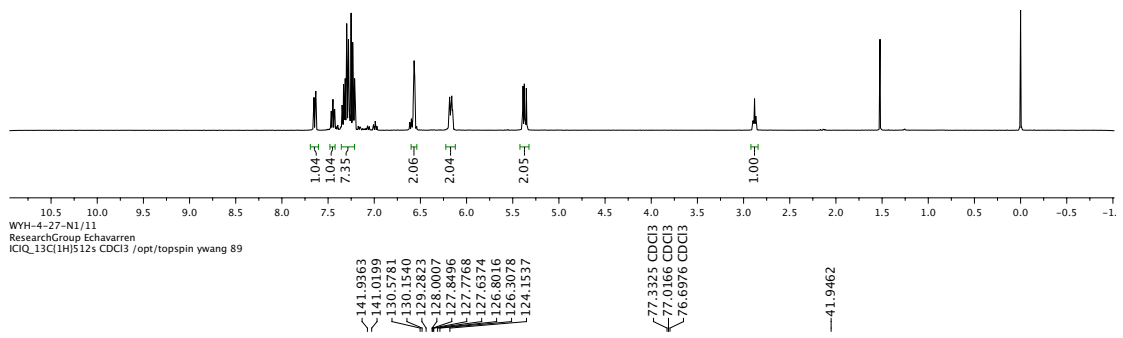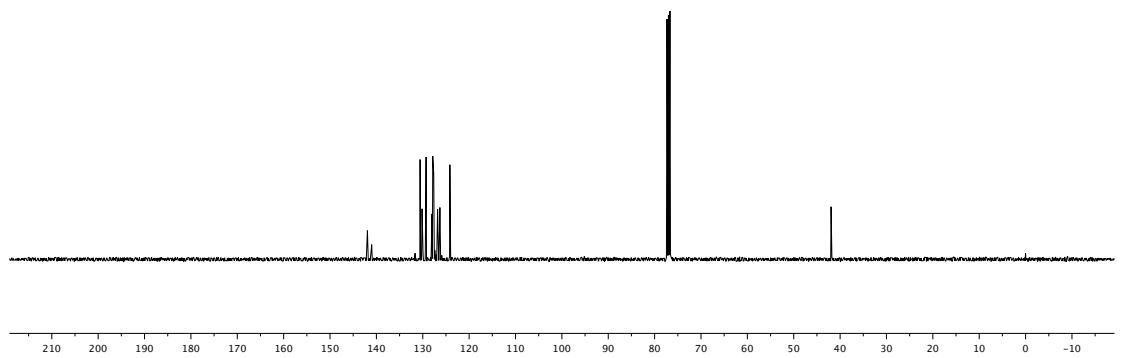

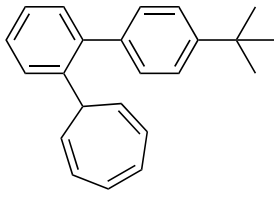

WYH-4-40/10  
ResearchGroup Echavarren  
ICIQ\_1H12p8s CDCl3 /opt/topspin ywang 49

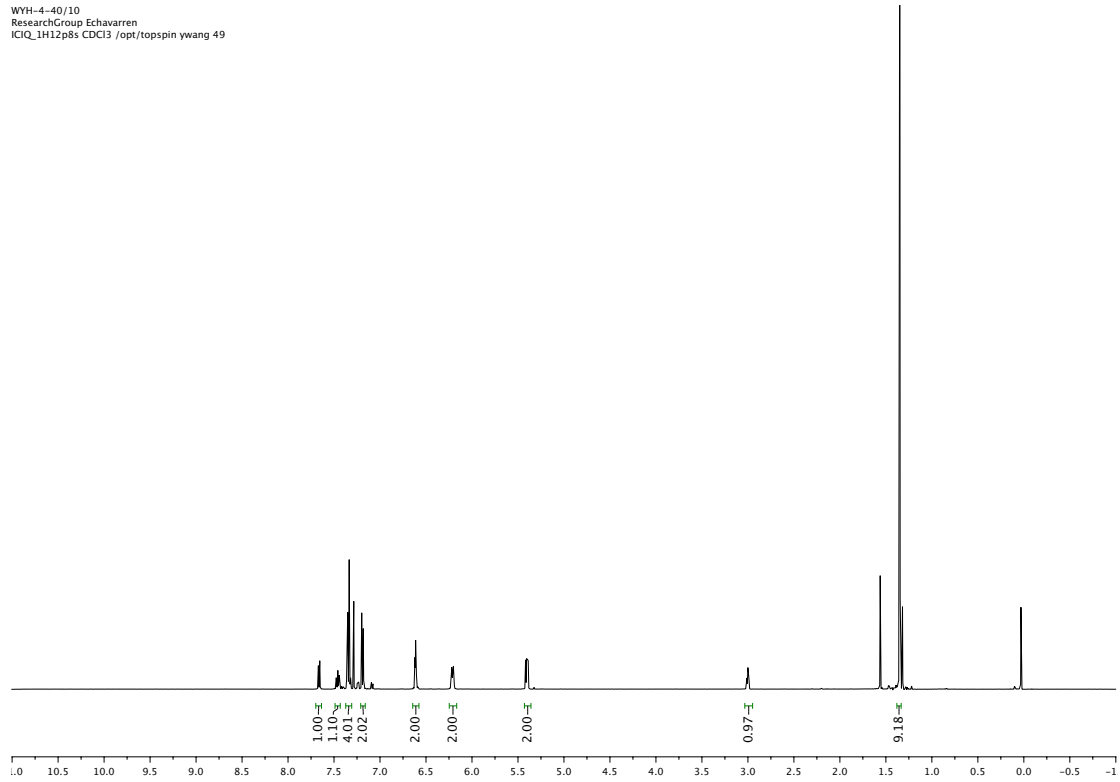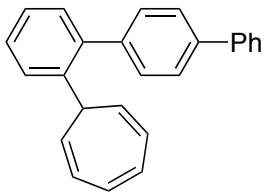

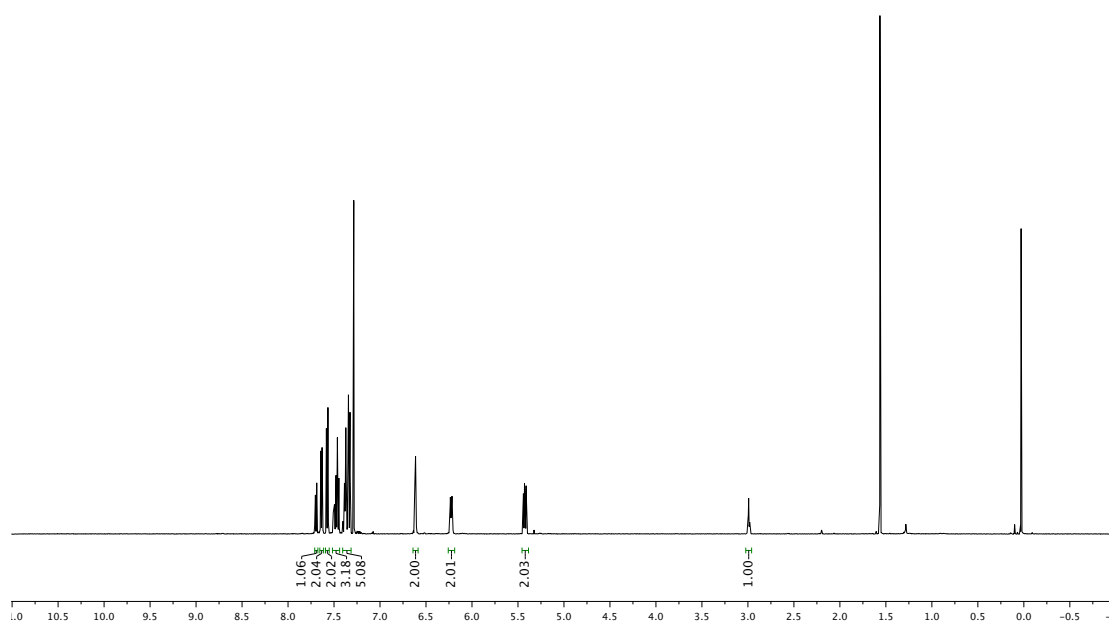

WYH-4-41/11  
ResearchGroup Echavarren  
ICIQ\_13C1H1512s CDCl3 /opt/topspin ywang 50

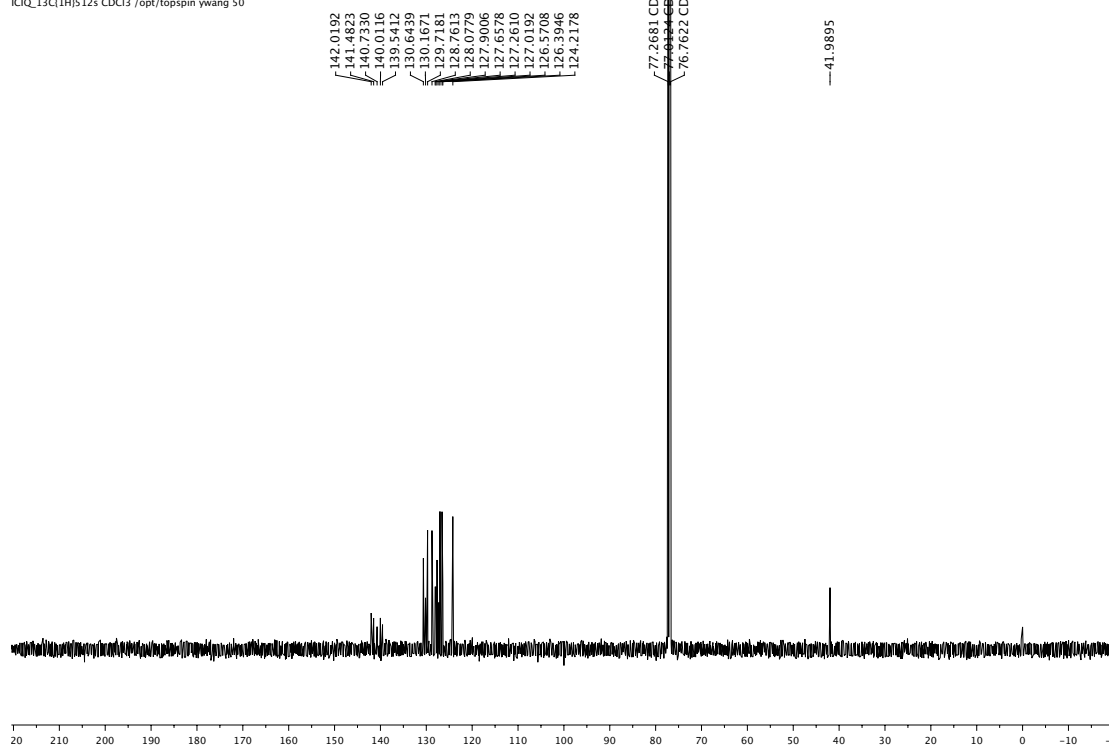

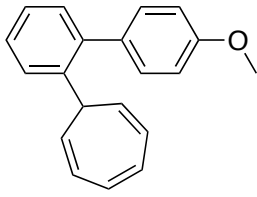

WH-4-43-N/10  
 ResearchGroup Echavarren  
 ICIQ\_1H12p8s CDCI3 /opt/topspin ywang 68

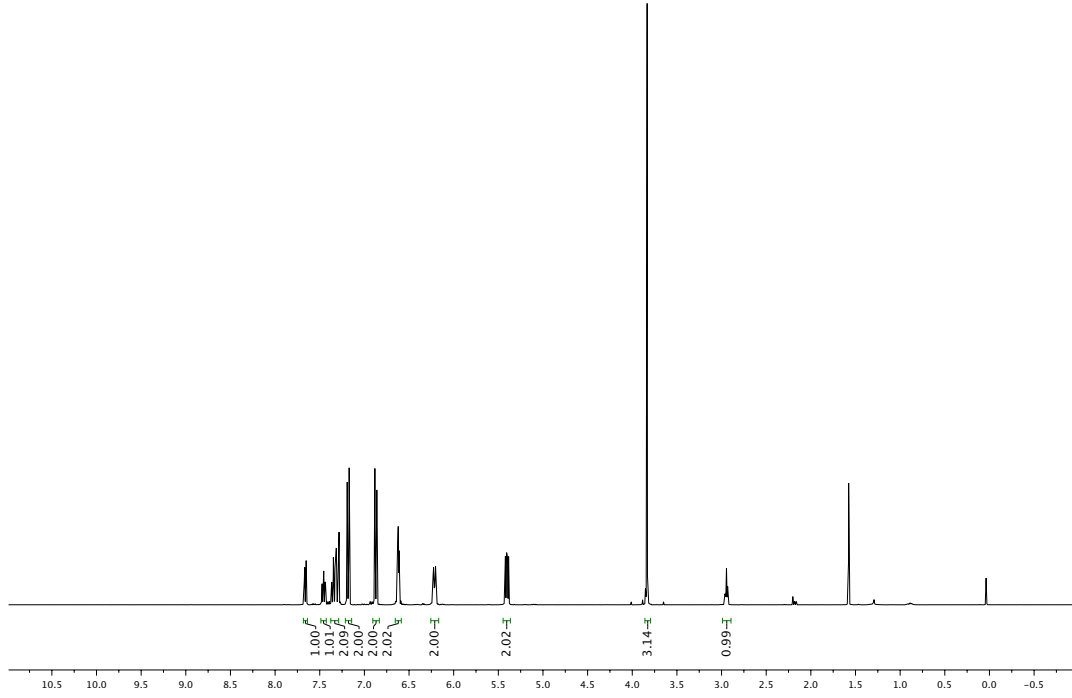

WH-4-43-N/11  
 ResearchGroup Echavarren  
 ICIQ\_13C1H512s CDCI3 /opt/topspin ywang 68

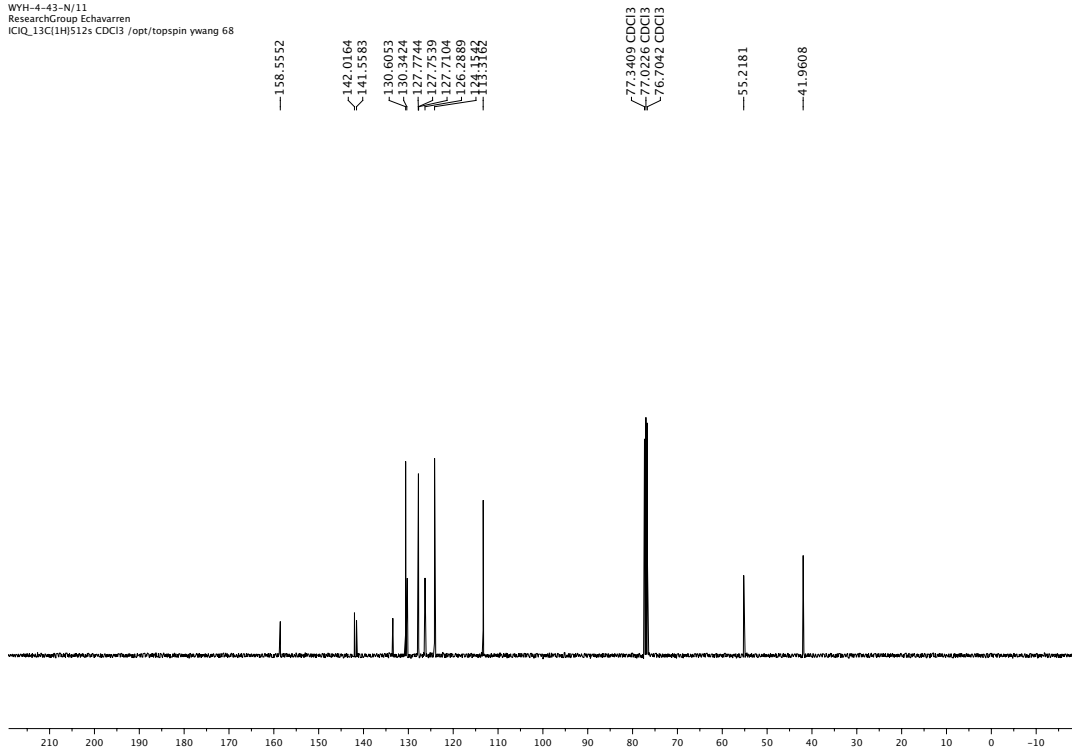

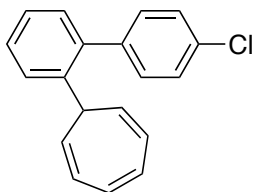

WYH-4-54-NN/10  
 ResearchGroup Echavarren  
 ICIQ\_1H12p8s CDCl3 /opt/topspin ywang 95

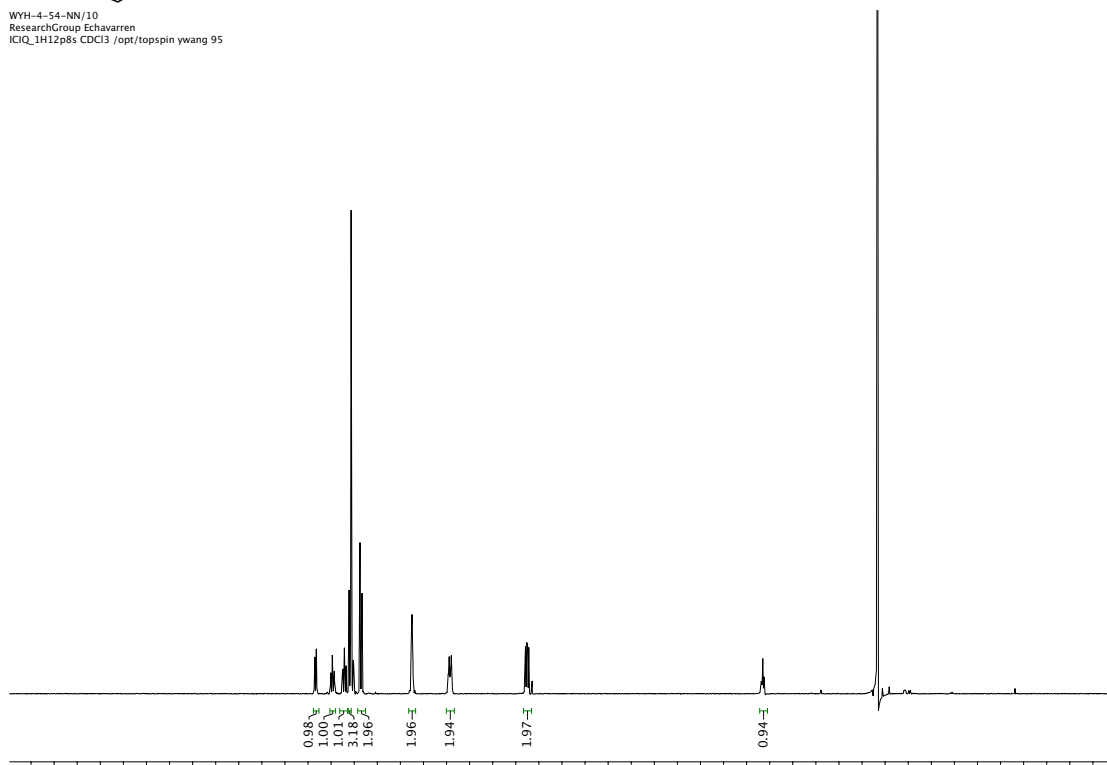

WYH-4-54-NN/11  
 ResearchGroup Echavarren  
 ICIQ\_13C1H1512s CDCl3 /opt/topspin ywang 84

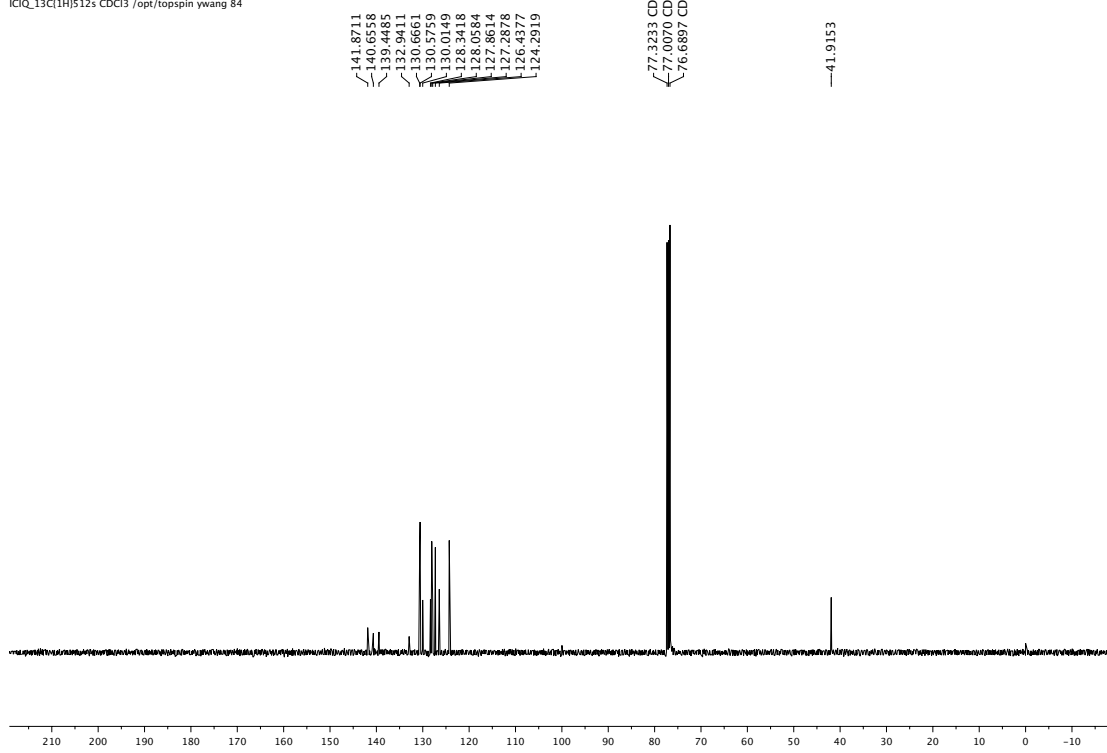

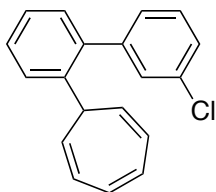

WYH-4-55-N/10  
 ResearchGroup Echavarren  
 ICIQ\_1H12p8s CDCI3 /opt/topspin ywang 85

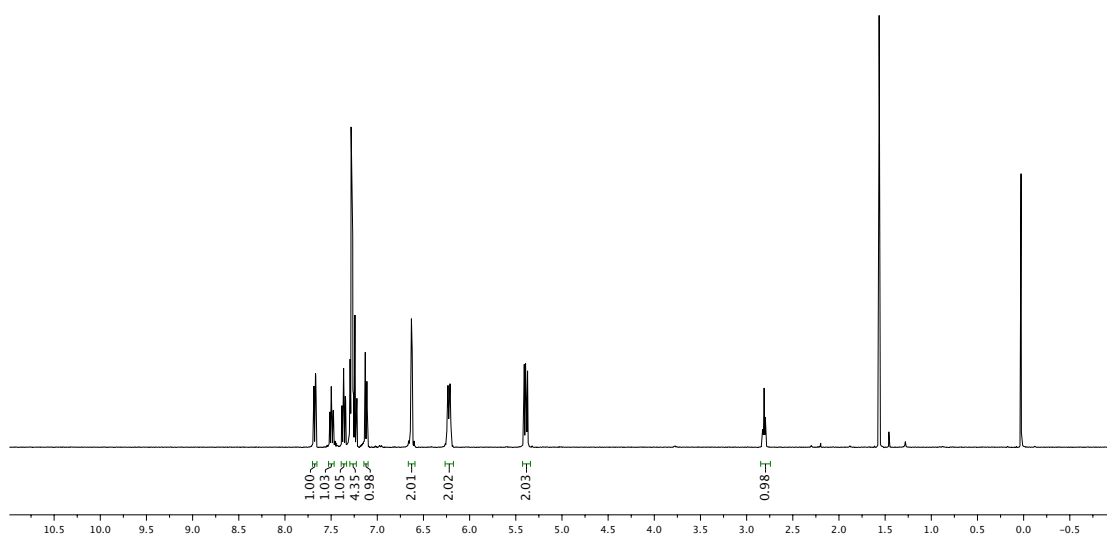

WYH-4-55-N/11  
 ResearchGroup Echavarren  
 ICIQ\_13C11HJ512s CDCI3 /opt/topspin ywang 85

142.7583  
 140.5157  
 140.5016  
 133.7201  
 130.6491  
 129.9382  
 129.0274  
 128.4887  
 127.8208  
 127.4791  
 127.1722  
 126.8782  
 115.4589  
 114.2932

77.3289 CDCI3  
 77.0097 CDCI3  
 76.6911 CDCI3

41.9551

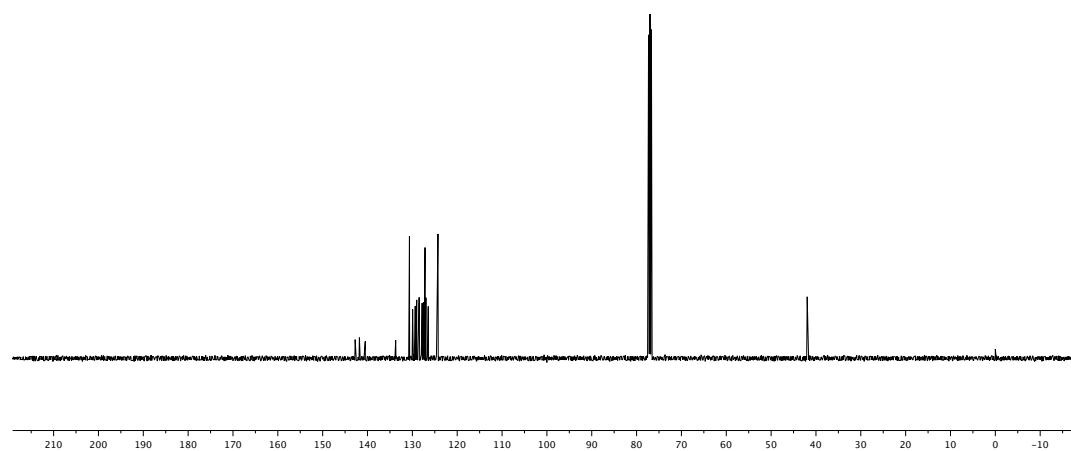

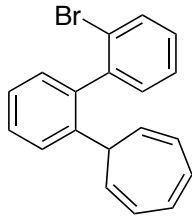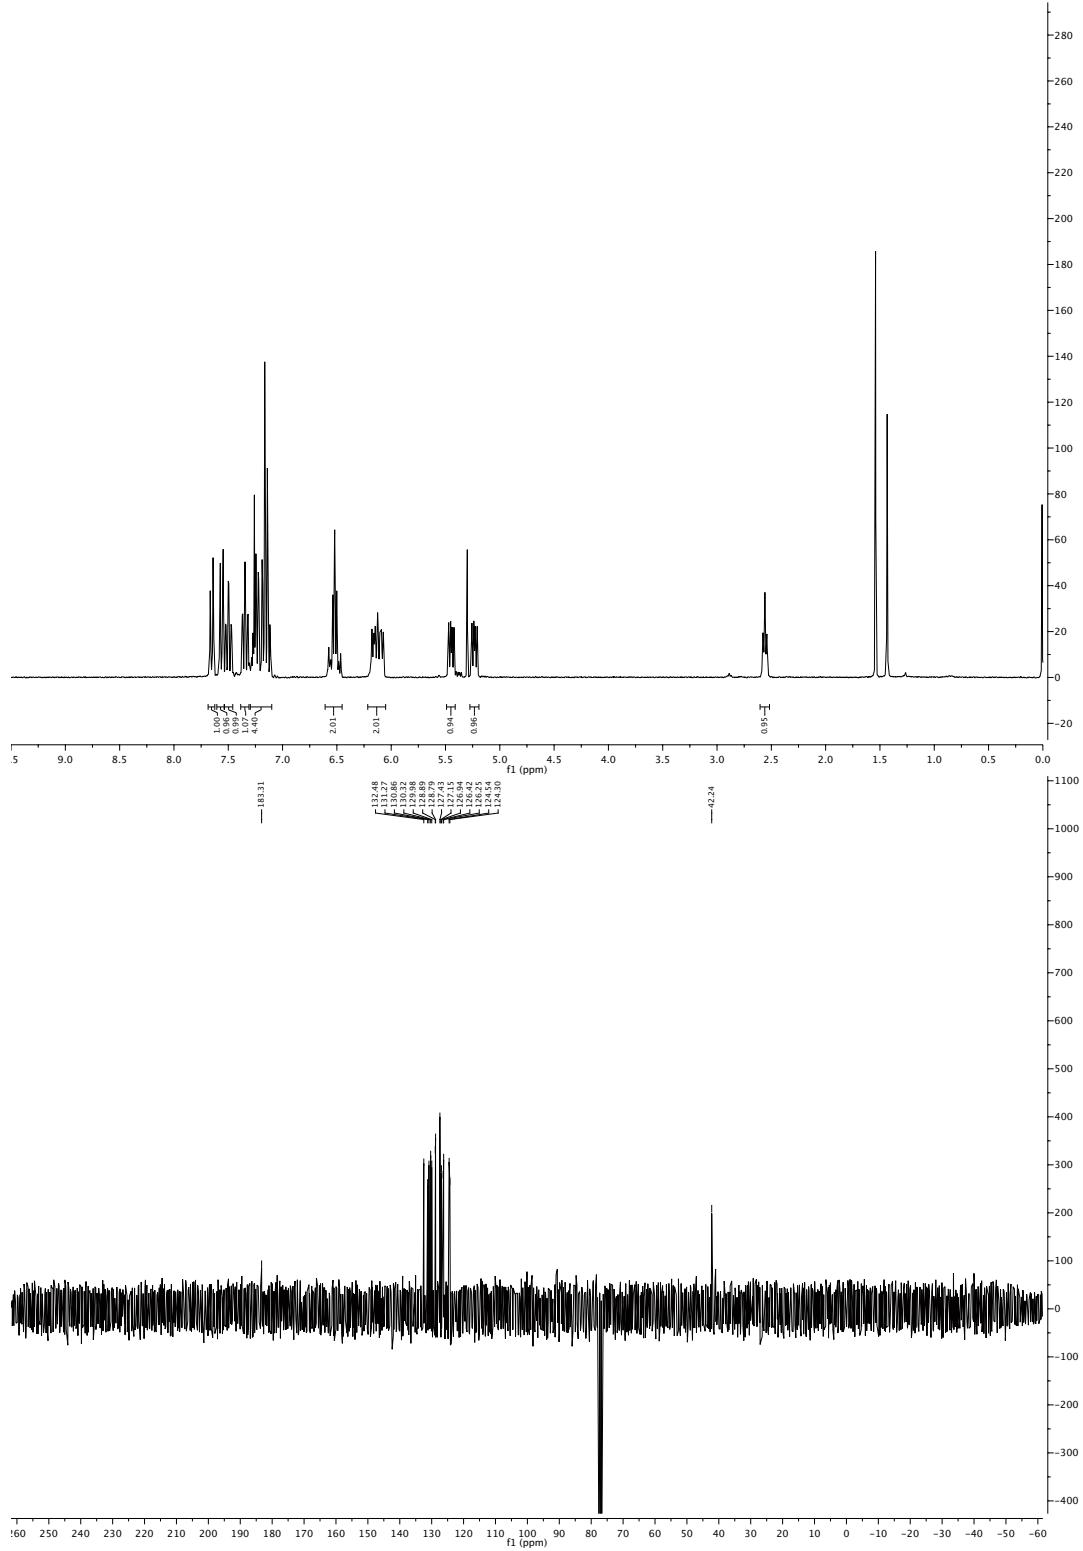



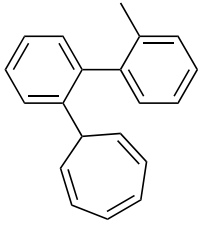

WH-4-63/10  
 ResearchGroup Echavarren  
 ICIQ\_1H12p8s CDCI3 /opt/topspin ywang 114

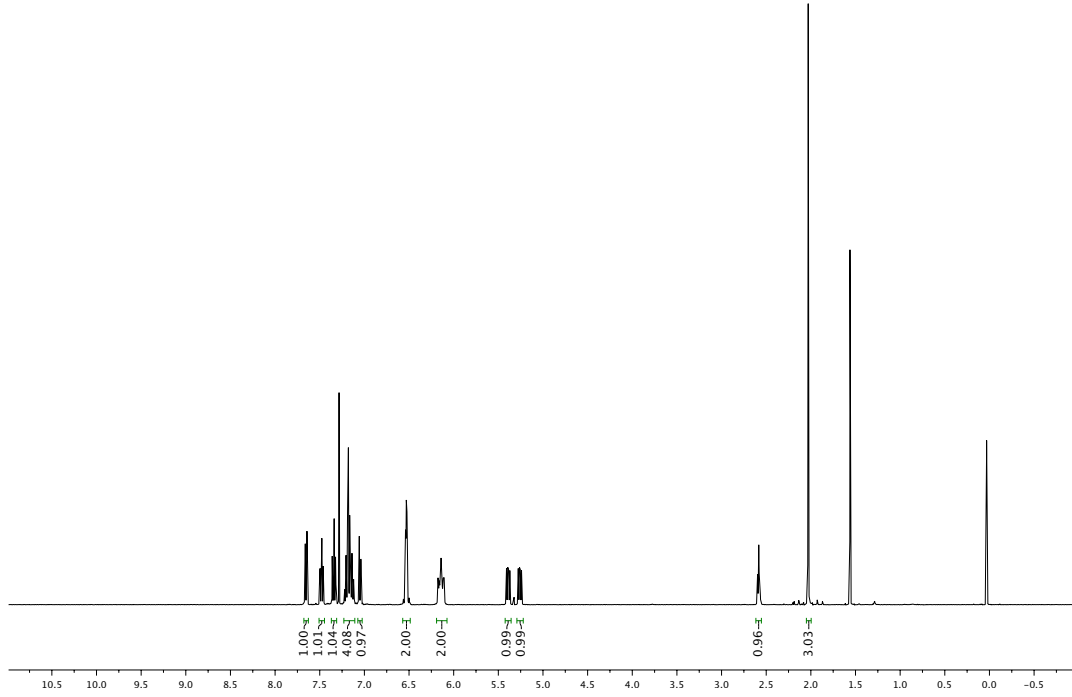

WH-4-63/11  
 ResearchGroup Echavarren  
 ICIQ\_13C1H512s CDCI3 /opt/topspin ywang 114

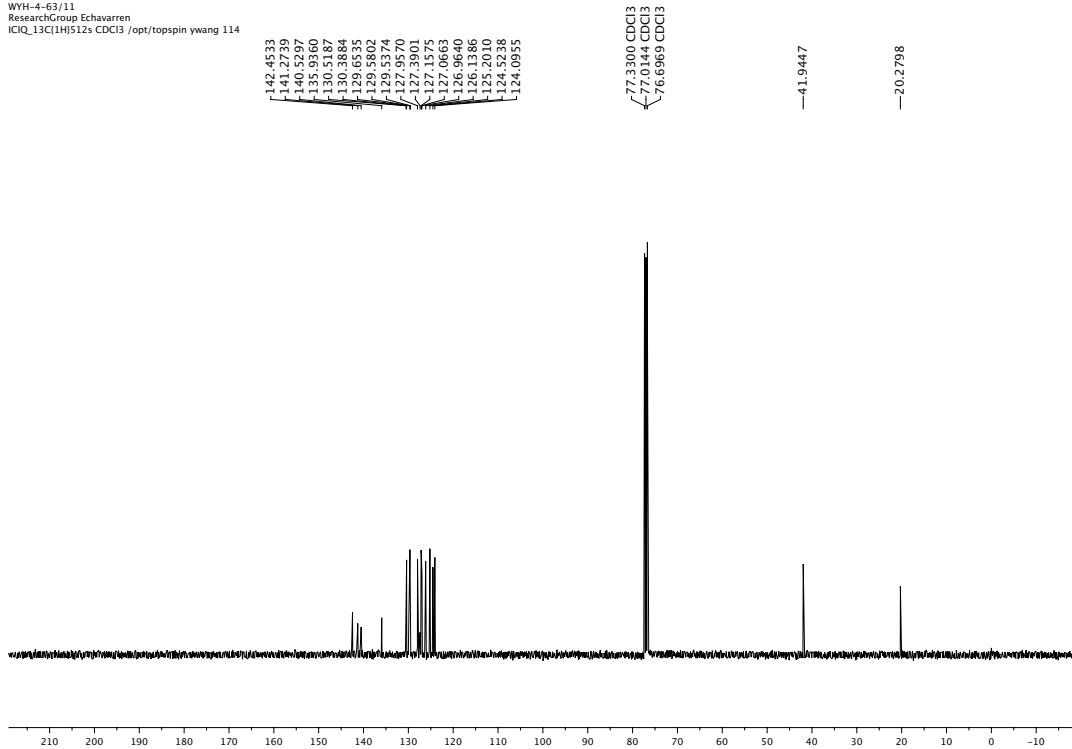

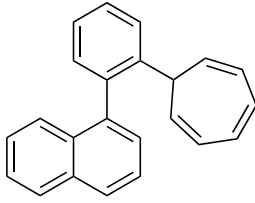

PM4-080-characterisation/10  
 ResearchGroup Echavarren  
 PM4-080 characterisation  
 ICIQ\_1H12p32s CDCl3 /opt/topspin pmcgonigal 27

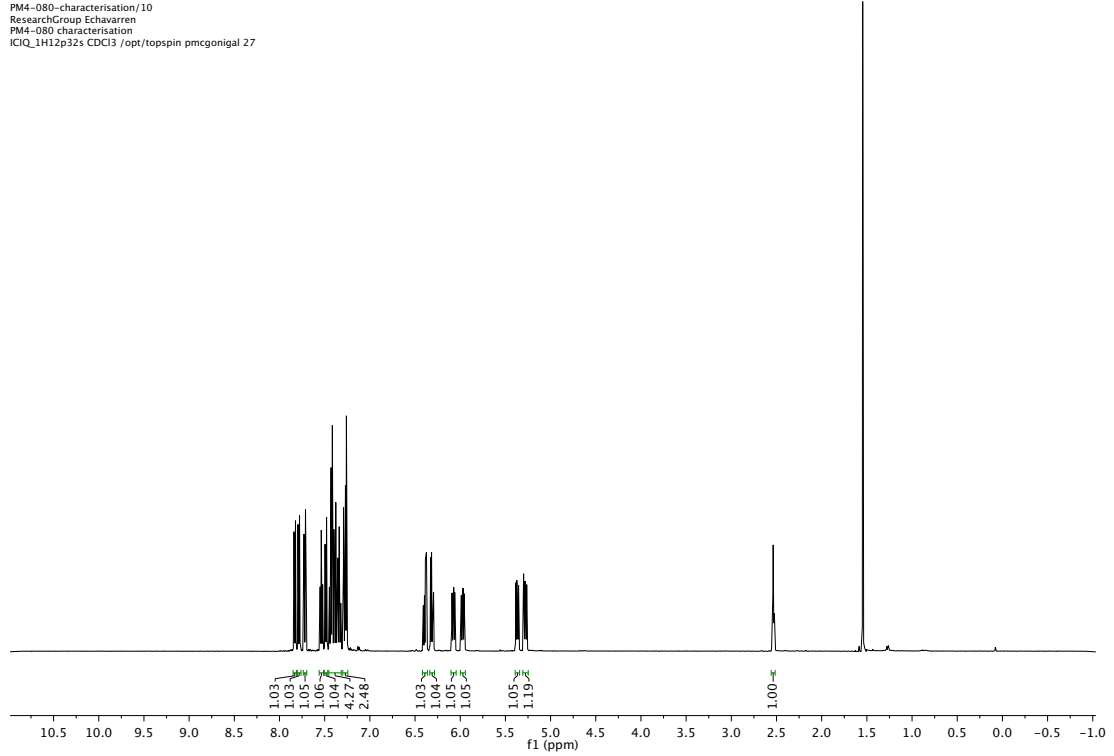

PM4-080-characterisation/11  
 ResearchGroup Echavarren  
 PM4-080 characterisation  
 ICIQ\_13C1H1512s CDCl3 /opt/topspin pmcgonigal 27

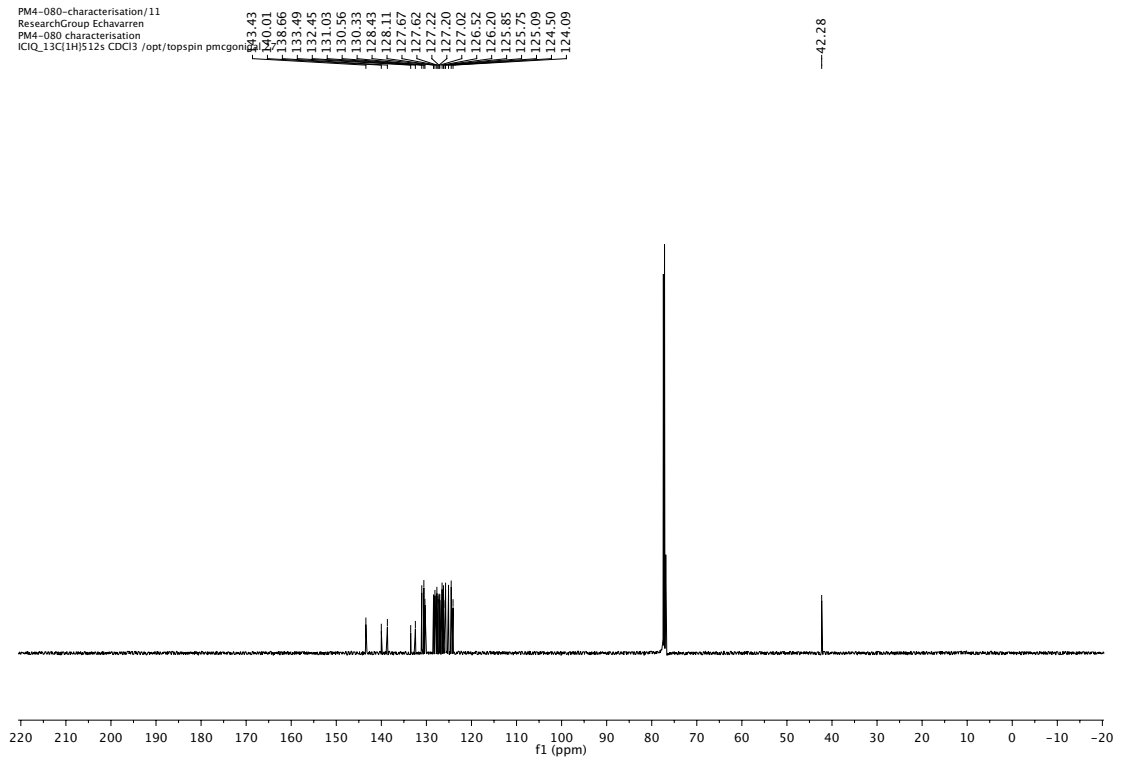

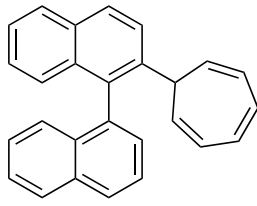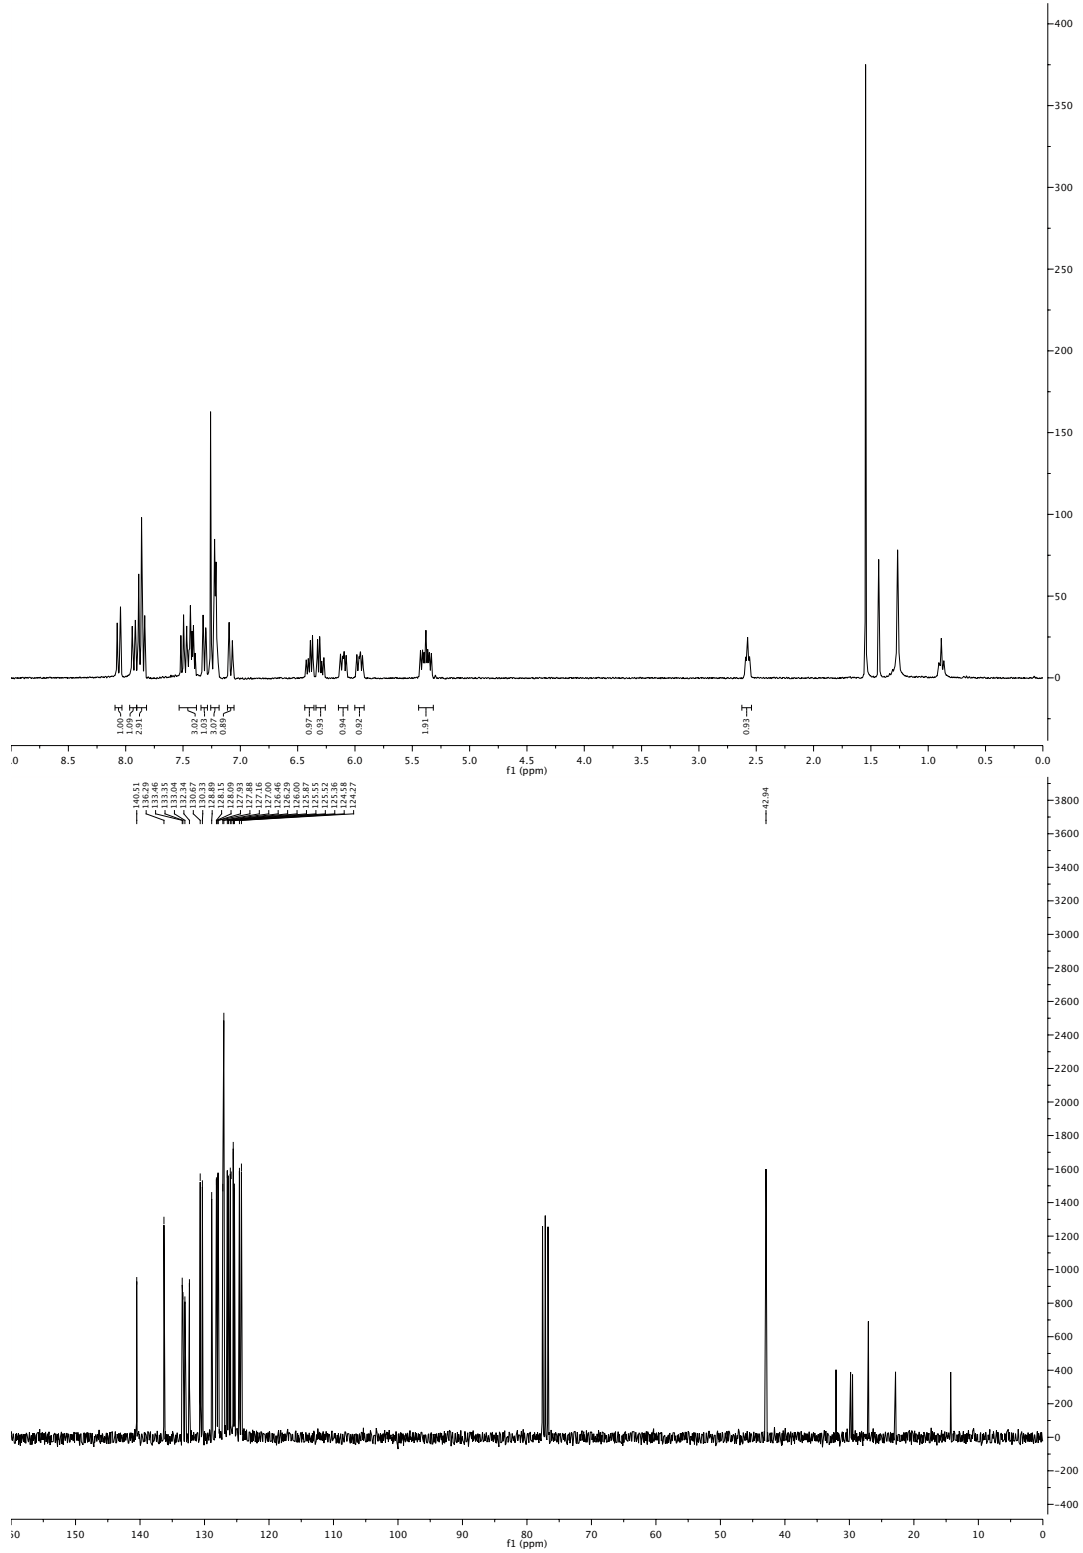

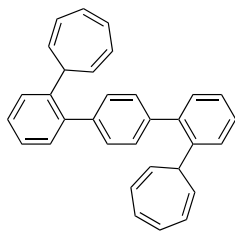

WYH-6-75.10.fid  
 ResearchGroup Echavarren  
 ICIQ\_1H12p8s CDCI3 /opt/topspin ywang 2

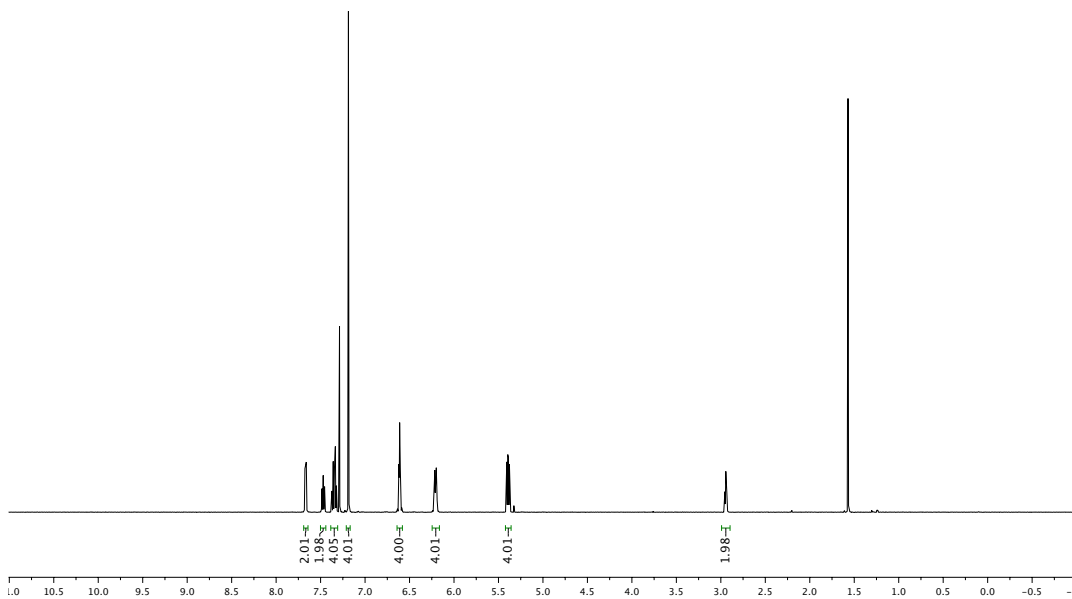

WYH-6-75.11.fid  
 ResearchGroup Echavarren  
 ICIQ\_13C11H512s CDCI3 /opt/topspin ywang 2

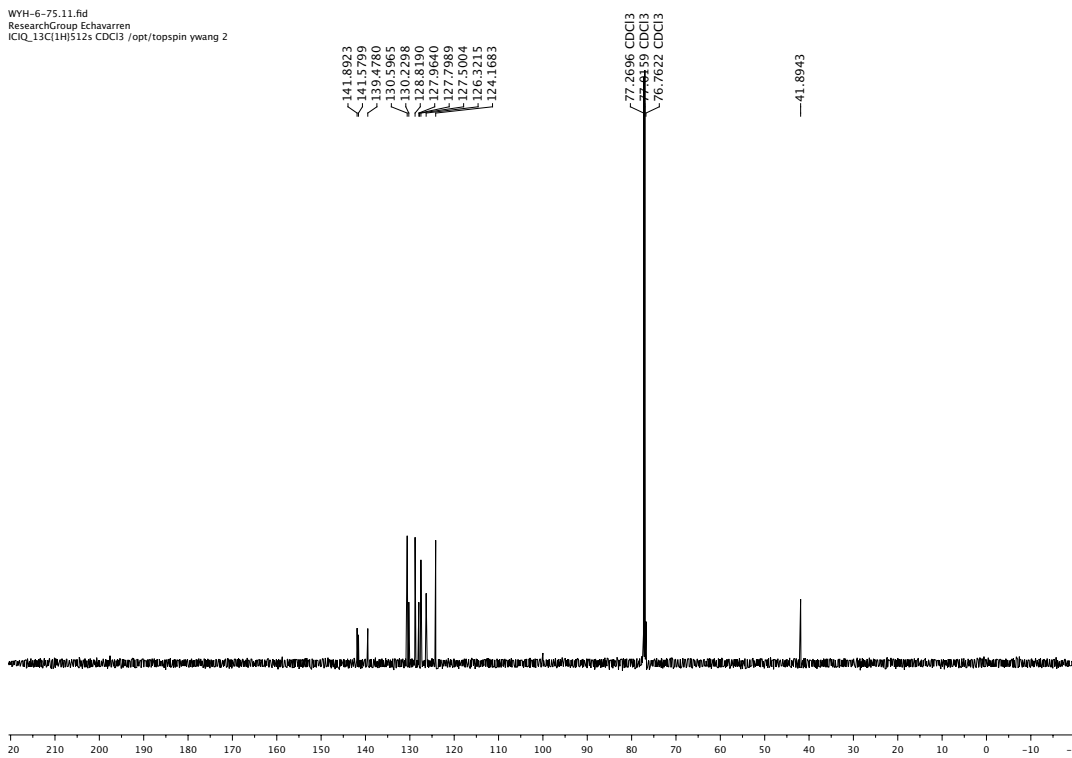

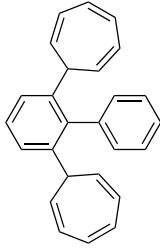

WYH-6-96-2.10.fid  
 ResearchGroup Echavarren  
 ICIQ\_1H12p8s CDC13 /opt/topspin ywang 32

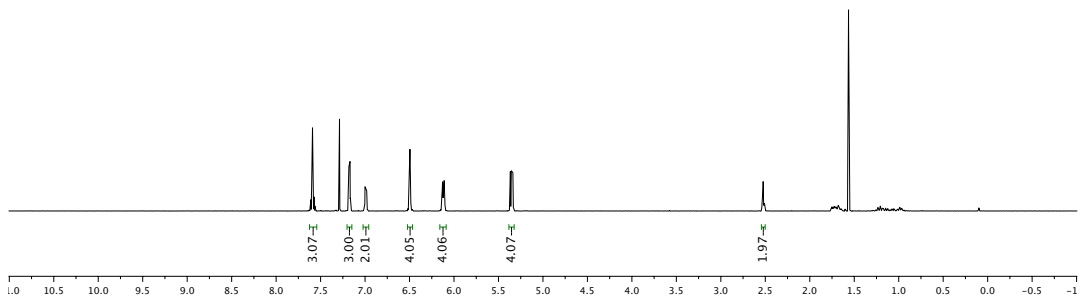

WYH-6-96-2-N.10.fid  
 ResearchGroup Echavarren  
 ICIQ\_13C1HJ512s CDC13 /opt/topspin ywang 97

142.7907  
 141.5863  
 138.4697  
 130.3646  
 129.4495  
 126.4484  
 125.1188  
 123.3190  
 126.6702  
 125.3246  
 123.9755

77.3261 CDC13  
 77.0097 CDC13  
 76.6915 CDC13

42.6188  
 30.1827  
 26.9057

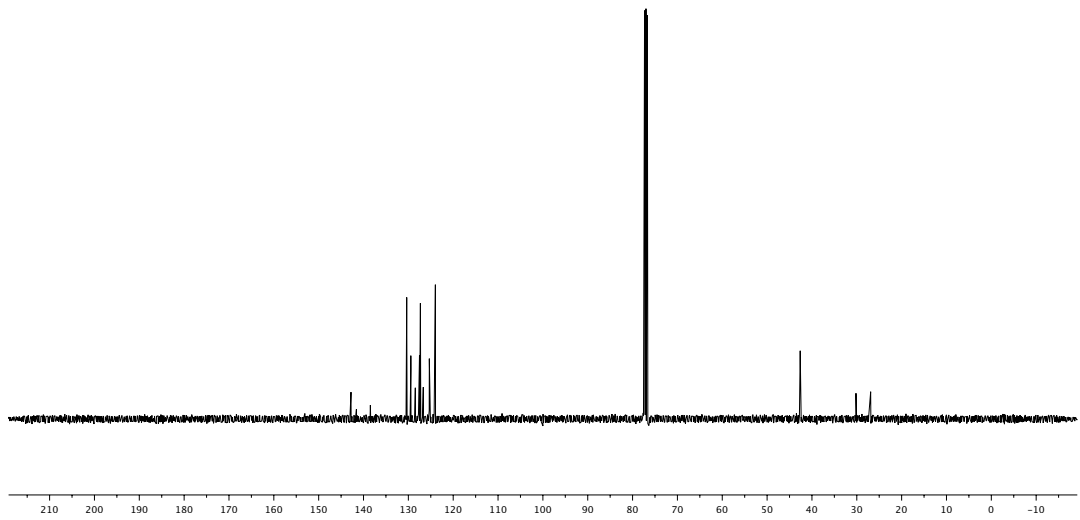

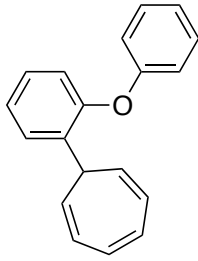

WYH-6-103.10.fid  
 ResearchGroup Echavarren  
 ICIQ\_1H12p8s CDCl3 /opt/topspin ywang 40

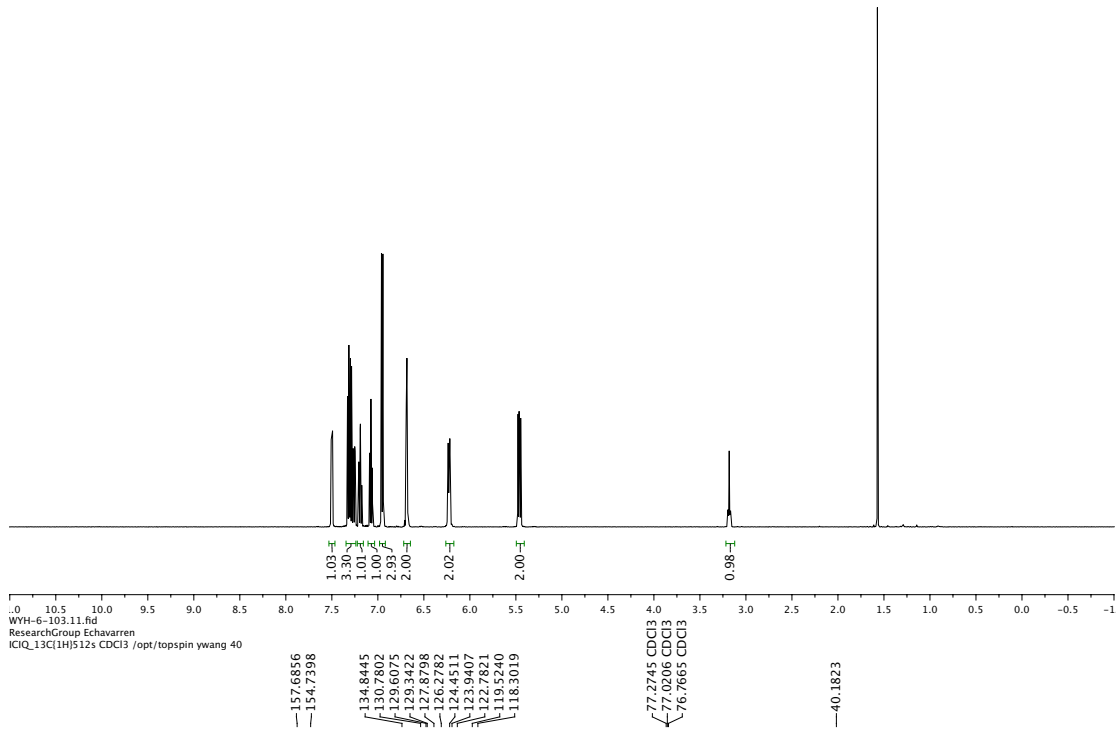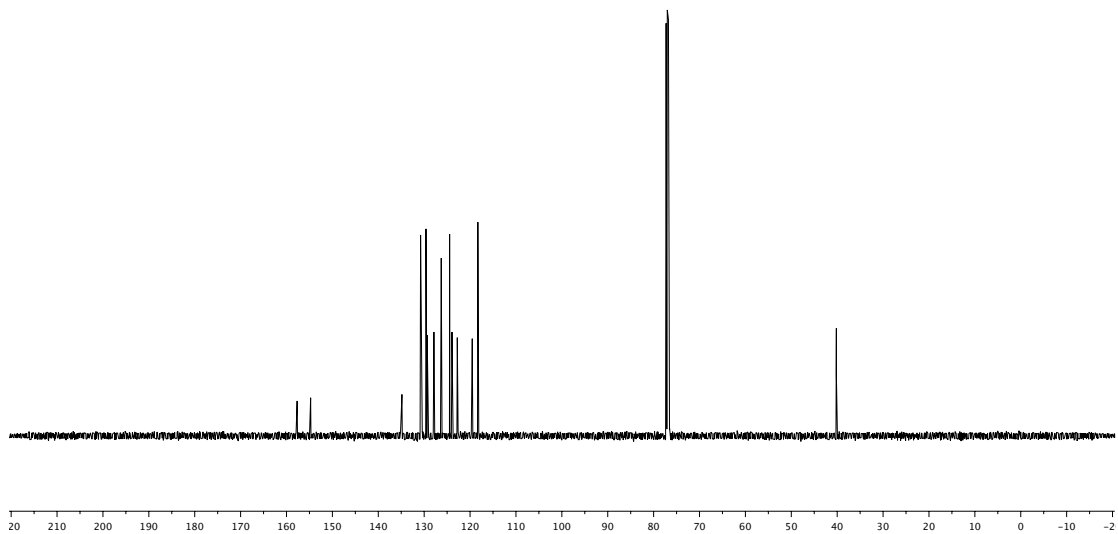

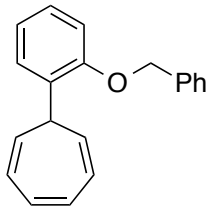

WYH-2-42-N.10.fid  
 ResearchGroup Echavarren  
 ICIQ\_1H12p8s CDCl3 /opt/topspin ywang 20

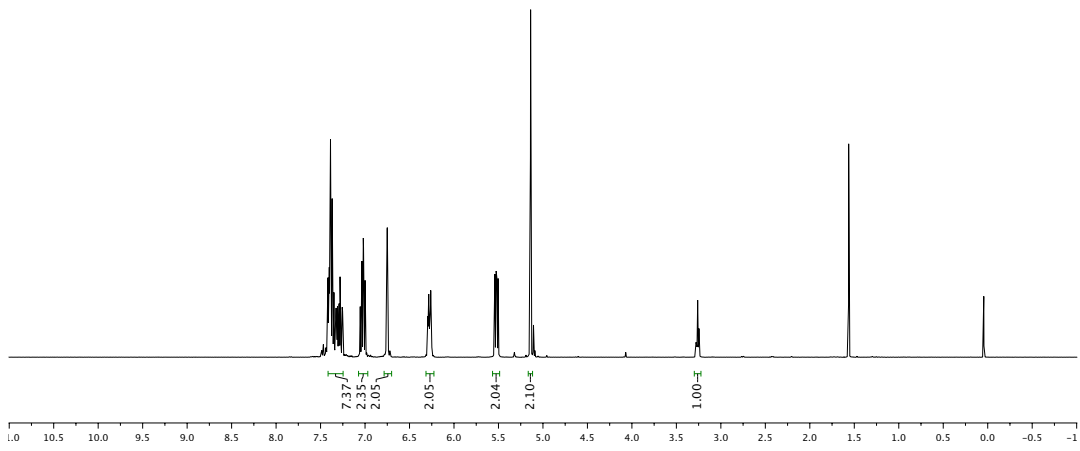

WYH-2-42-N.11.fid  
 ResearchGroup Echavarren  
 ICIQ\_13C1H1512s CDCl3 /opt/topspin ywang 20

156.4385  
 137.3212  
 132.1733  
 130.7947  
 128.8735  
 127.7585  
 127.5652  
 127.0206  
 126.7483  
 124.2075  
 121.1346  
 112.6159

77.3625 CDCl3  
 77.0440 CDCl3  
 76.7280 CDCl3  
 70.0388

40.6180

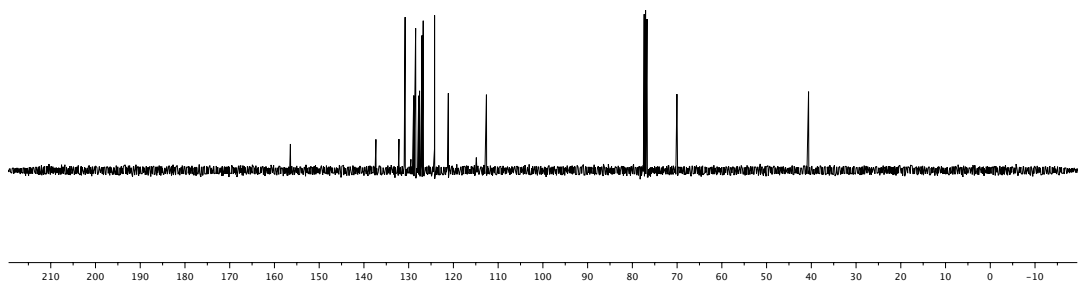

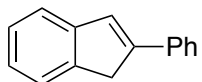

WYH-4-68/10  
ResearchGroup Echavarren  
ICIQ\_1H12p8s CDCl3 /opt/topspin ywang 98

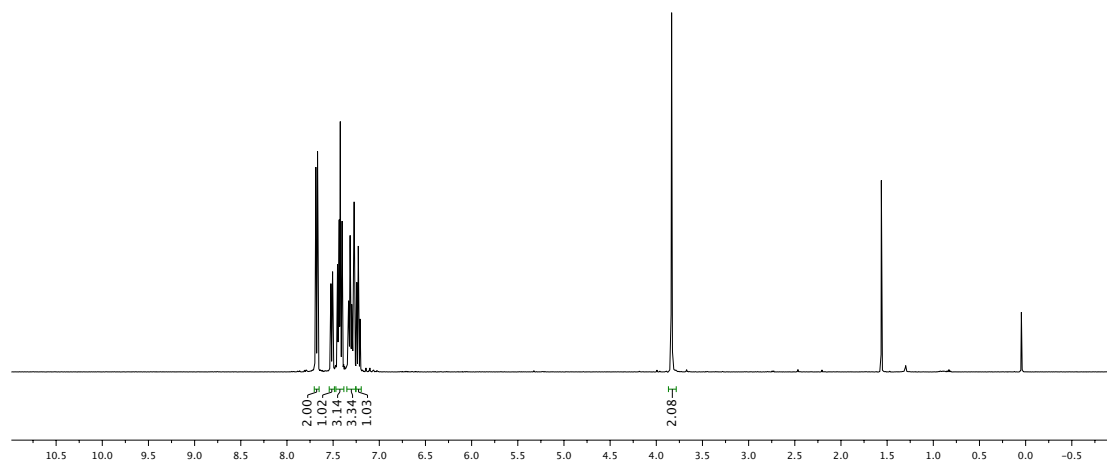

WYH-4-68/11  
ResearchGroup Echavarren  
ICIQ\_13C1H512s CDCl3 /opt/topspin ywang 98

146.4385  
145.3832  
143.1658  
136.0160  
128.6993  
127.5369  
126.6347  
126.5381  
125.6597  
124.7650  
123.6813  
120.9972

77.3473 CDCl3  
77.0309 CDCl3  
76.7140 CDCl3

39.0152

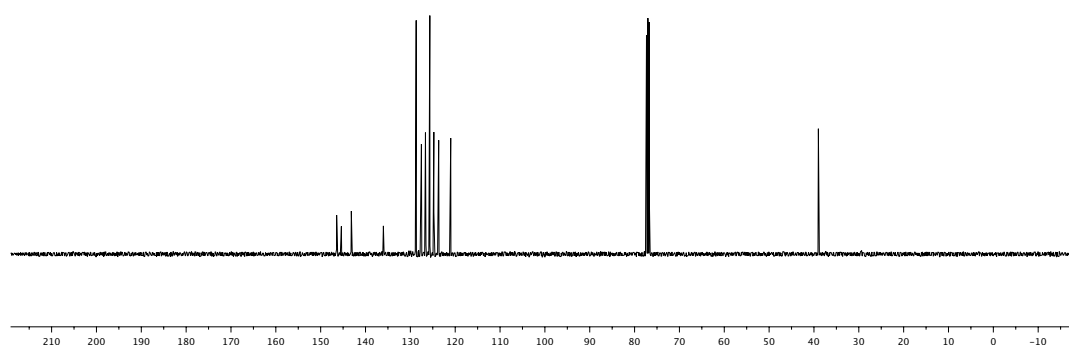



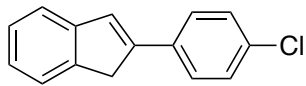

WYH-4-88/10  
 ResearchGroup Echavarren  
 ICIQ\_1H12p8s CDCl3 /opt/topspin ywang 93

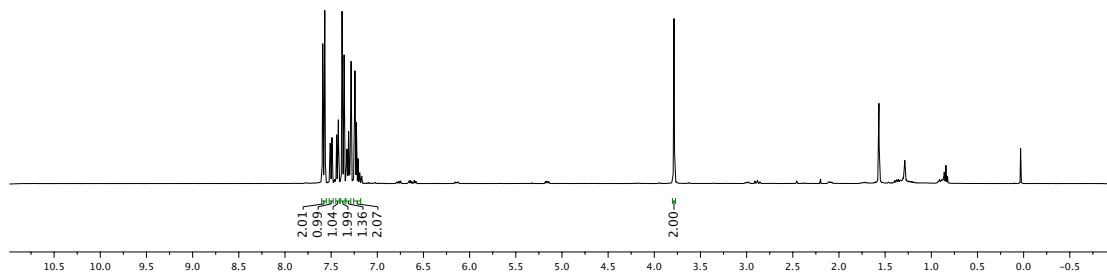

WYH-4-88/11  
 ResearchGroup Echavarren  
 ICIQ\_13C1H512s CDCl3 /opt/topspin ywang 93

145.1162  
 145.0926  
 143.0356  
 134.4957  
 133.1446  
 128.8446  
 128.0328  
 126.8228  
 126.7356  
 125.0270  
 123.7033  
 121.1212

77.3360 CDCl3  
 77.0174 CDCl3  
 76.6990 CDCl3

38.9861

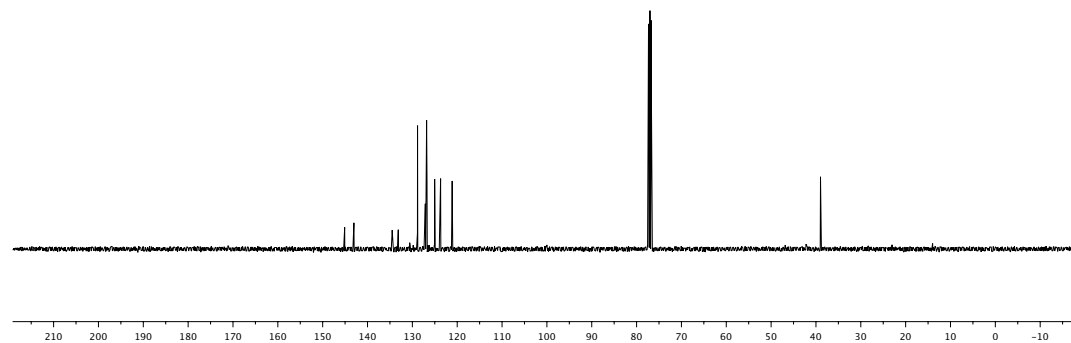

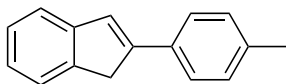

WYH-4-89/10  
 ResearchGroup Echavarren  
 ICIQ\_1H12p8s CDCI3 /opt/topspin ywang 94

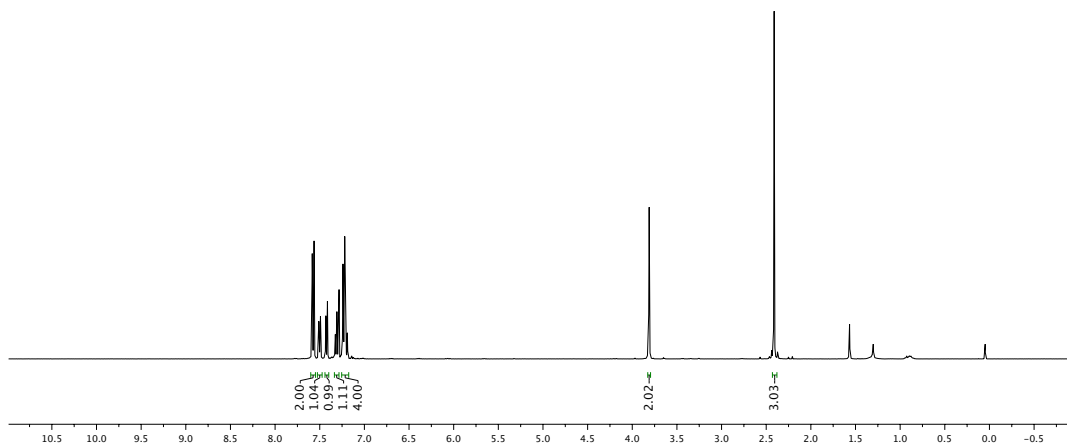

WYH-4-89/11  
 ResearchGroup Echavarren  
 ICIQ\_13C1H128s CDCI3 /opt/topspin ywang 94

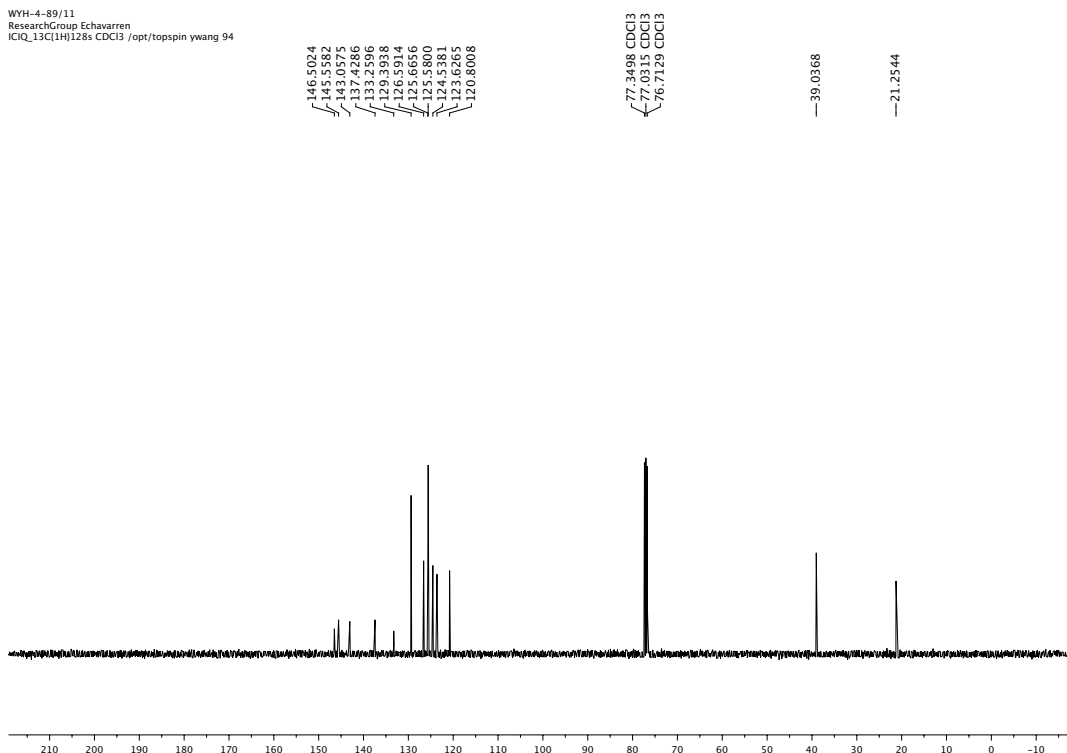

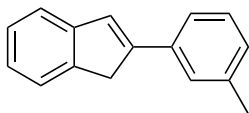

WYH-4-90/10  
 ResearchGroup Echavarren  
 ICIQ\_1H12p8s CDCl3 /opt/topspin ywang 95

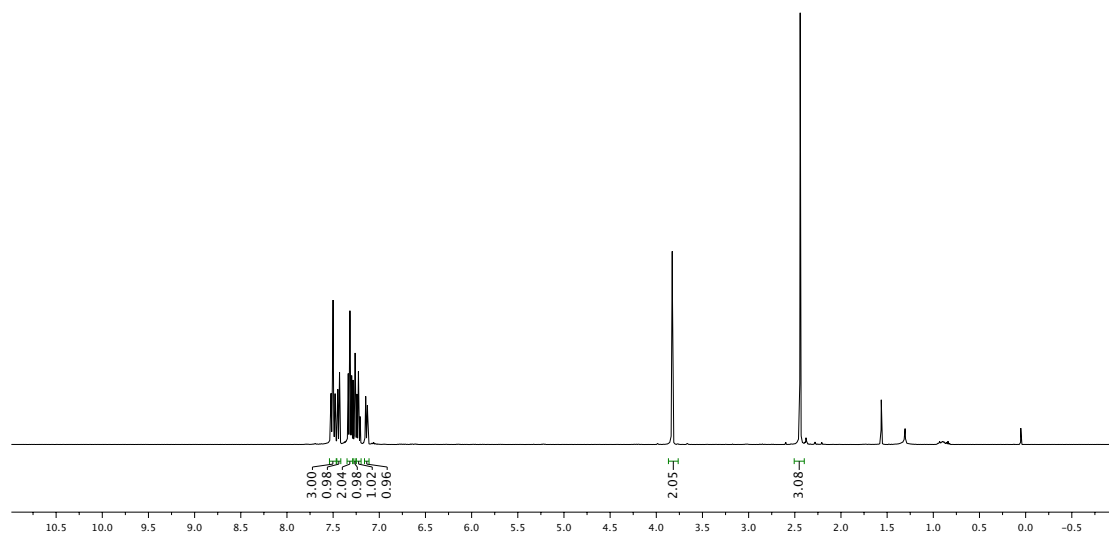

WYH-4-90/11  
 ResearchGroup Echavarren  
 ICIQ\_13C1H12p8s CDCl3 /opt/topspin ywang 95

146.5968  
 145.4494  
 143.1800  
 138.2052  
 138.0961  
 128.3576  
 126.6091  
 126.3954  
 124.6835  
 123.6591  
 122.8226  
 120.9390

77.3515 CDCl3  
 77.0352 CDCl3  
 76.7174 CDCl3

—39.0663

—21.5397

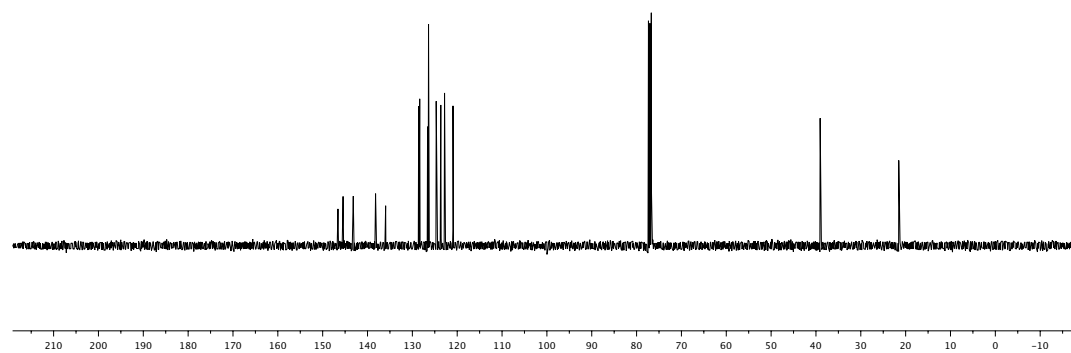

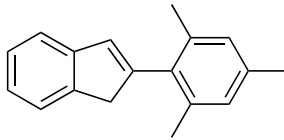

WYH-4-91/10  
ResearchGroup Echavarren  
ICIQ\_1H12p8s CDCI3 /opt/topspin ywang 96

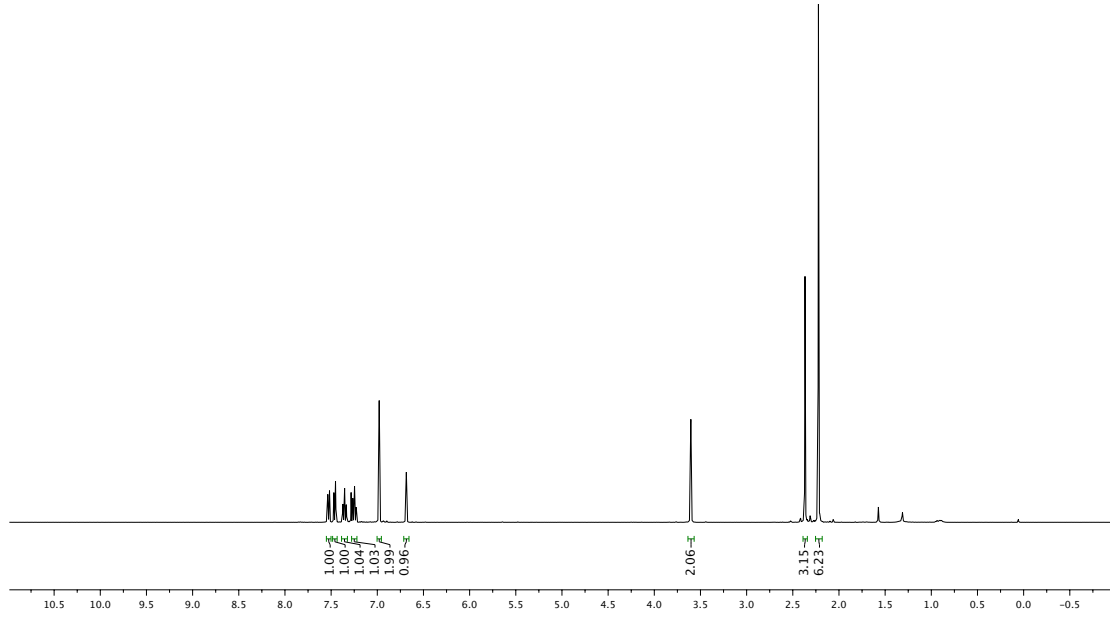

WYH-4-91/11  
ResearchGroup Echavarren  
ICIQ\_13C1H128s CDCI3 /opt/topspin ywang 96

147.6178  
143.5738  
143.5738  
136.7576  
136.2211  
134.7942  
130.2477  
128.0448  
126.4297  
124.2437  
123.5701  
120.7499  
77.3540 CDCI3  
77.0373 CDCI3  
76.7190 CDCI3  
-42.1719  
21.0149  
20.5052

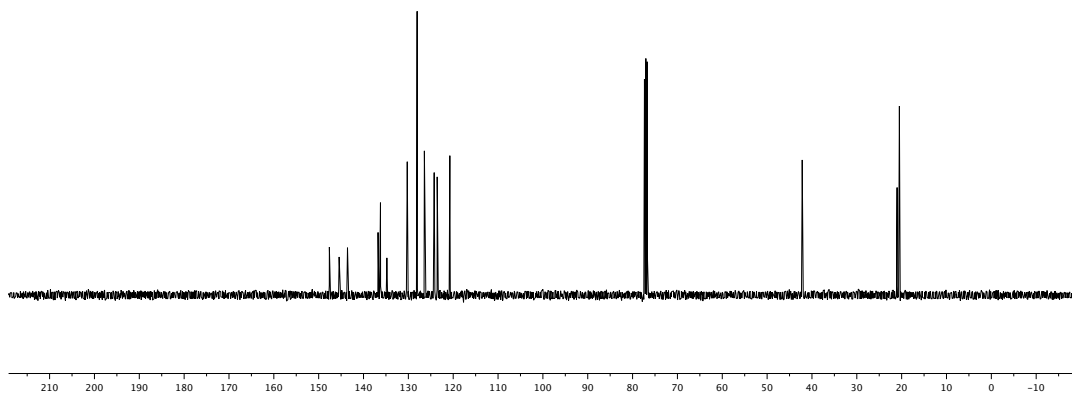

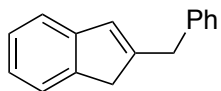

WYH-4-125/10  
 ResearchGroup Echavarren  
 CIQ\_1H12p8s CDCI3 /opt/topspin ywang 91

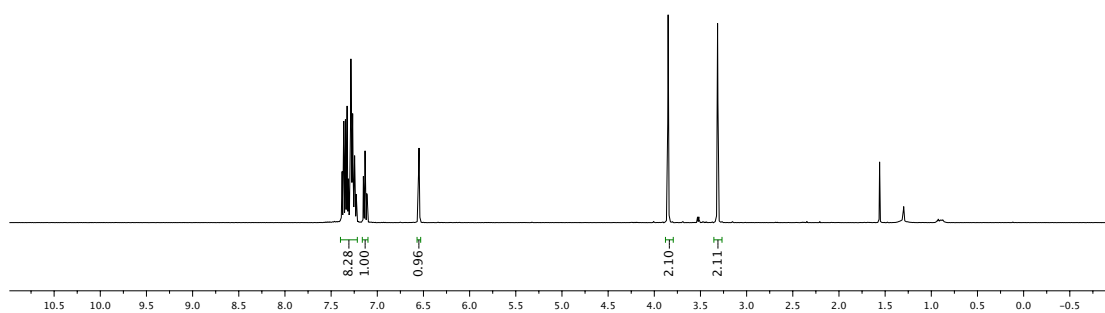

WYH-4-125/11  
 ResearchGroup Echavarren  
 CIQ\_13C1H128s CDCI3 /opt/topspin ywang 91

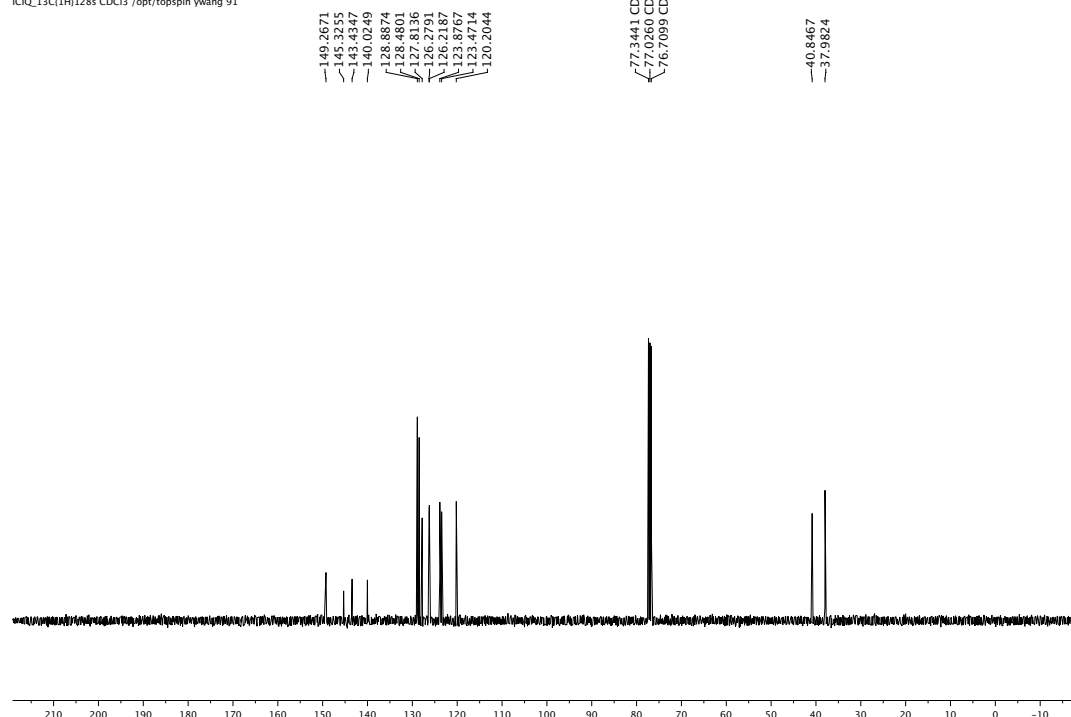

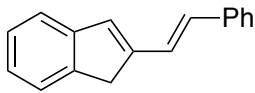

WH-5-117-2/10  
 ResearchGroup Echavarren  
 ICIQ\_1H12p8s CDCl3 /opt/topspin ywang 3

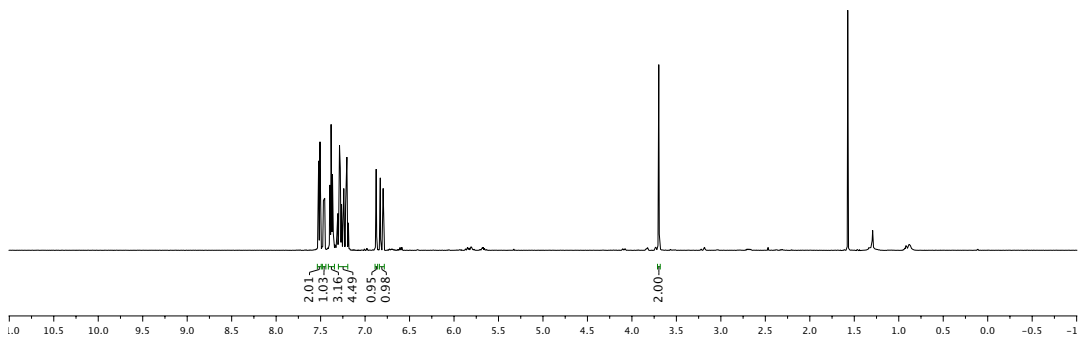

WH-5-117-2/11  
 ResearchGroup Echavarren  
 ICIQ\_13C1H512s CDCl3 /opt/topspin ywang 3

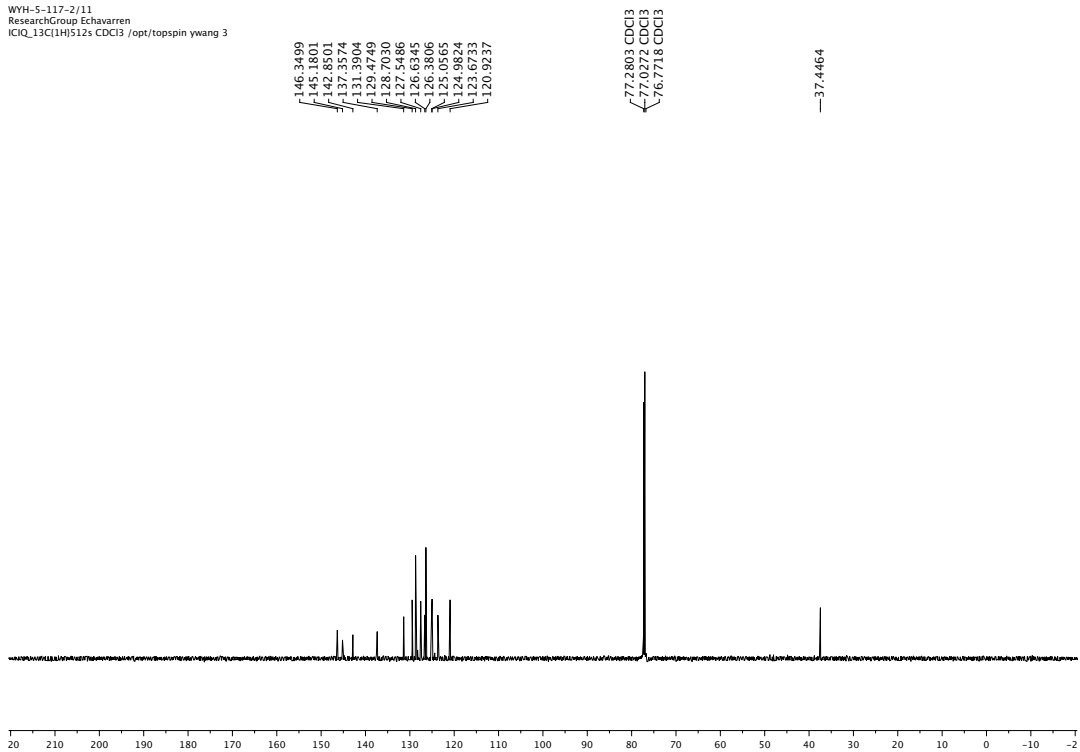

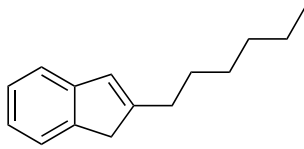

WYH-4-126/10  
 ResearchGroup Echavarren  
 ICIQ\_1H12p8s CDCl3 /opt/topspin ywang 92

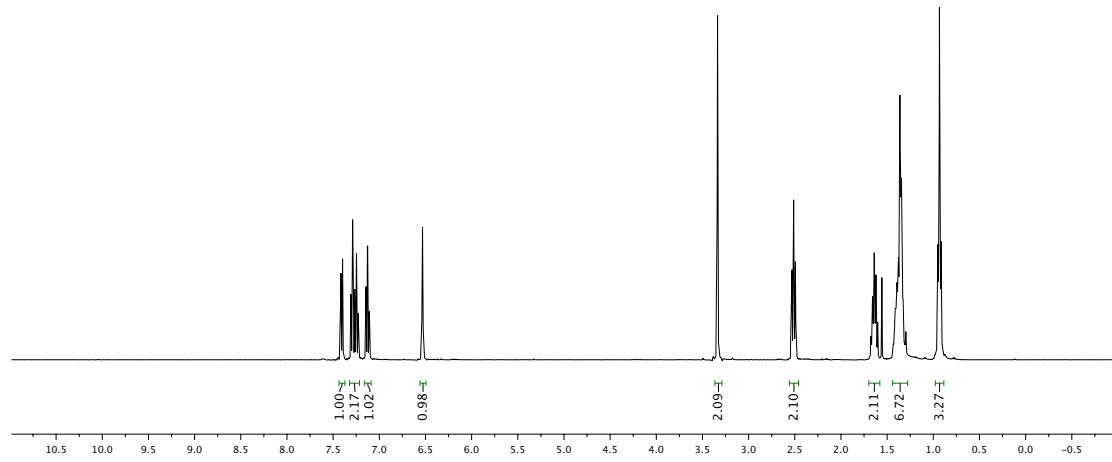

WYH-4-126/11  
 ResearchGroup Echavarren  
 ICIQ\_13C1H128s CDCl3 /opt/topspin ywang 92

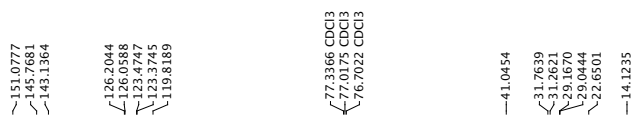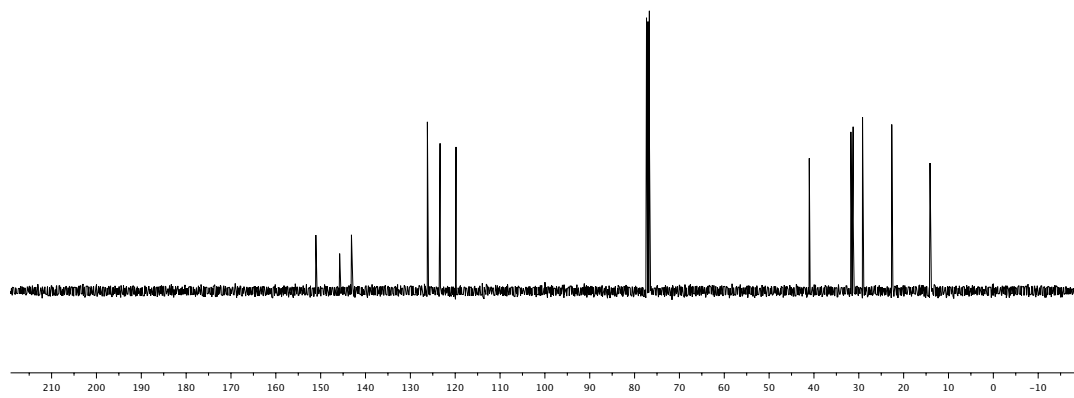

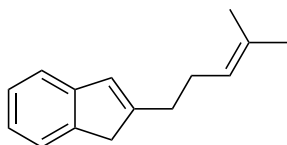

WYH-5-126-2/10  
 ResearchGroup Echavarren  
 ICIQ\_1H12p8s CDCl3 /opt/topspin ywang 20

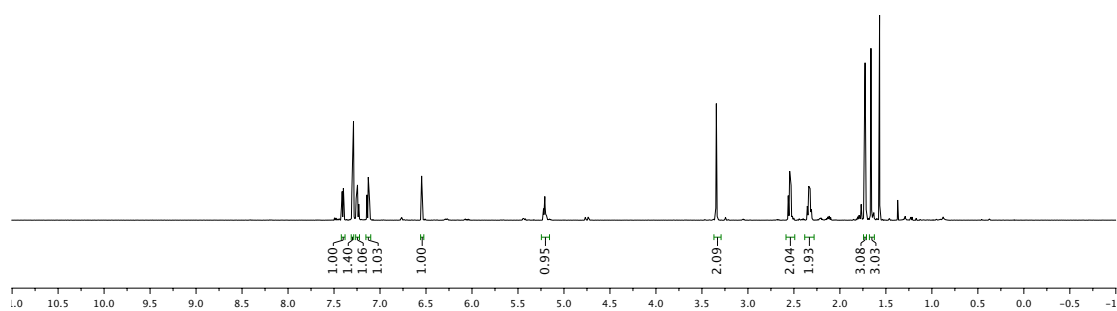

WYH-5-126-2/11  
 ResearchGroup Echavarren  
 ICIQ\_13C1H512s CDCl3 /opt/topspin ywang 20

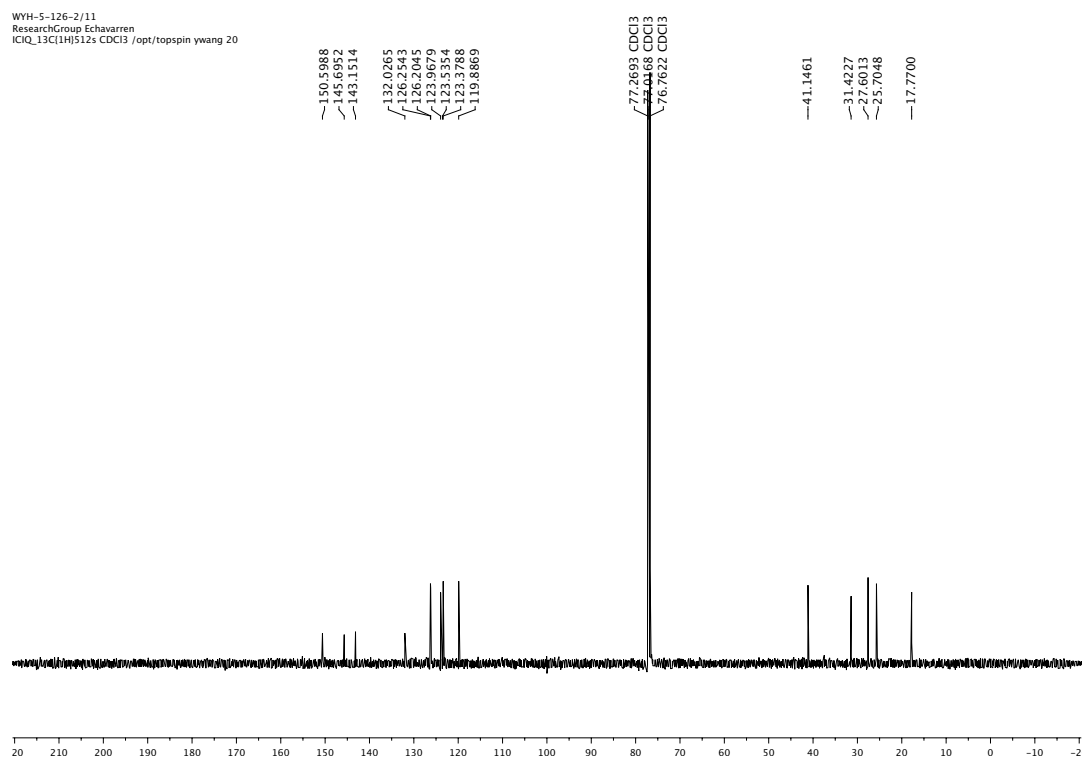



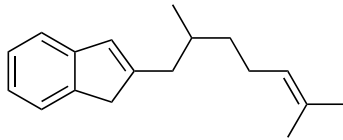

WH-9-8-8.10.fid  
 ResearchGroup Echavarren  
 ICIQ\_1H12p8s CDCl3 /opt/topspin ywang 65

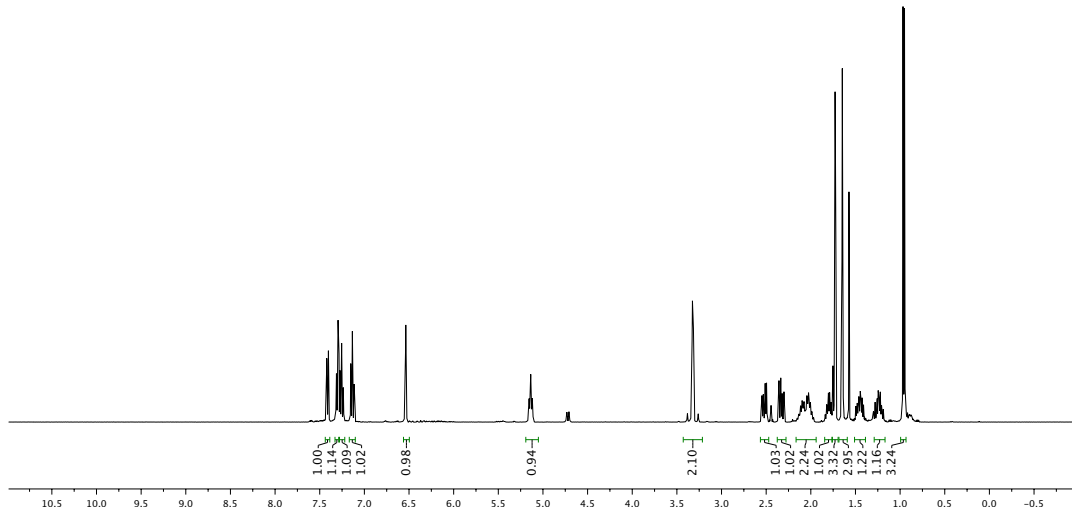

WH-9-8-8.11.fid  
 ResearchGroup Echavarren  
 ICIQ\_13C1H512s CDCl3 /opt/topspin ywang 65

148.7466  
 145.7178  
 143.2769  
 131.2731  
 127.5085  
 126.2124  
 124.7166  
 123.5014  
 123.3631  
 119.8304

77.3424 CDCl3  
 77.0253 CDCl3  
 76.7078 CDCl3

41.2480  
 39.0555  
 37.0405  
 32.6691  
 25.7386  
 25.6355  
 19.7886  
 17.6873

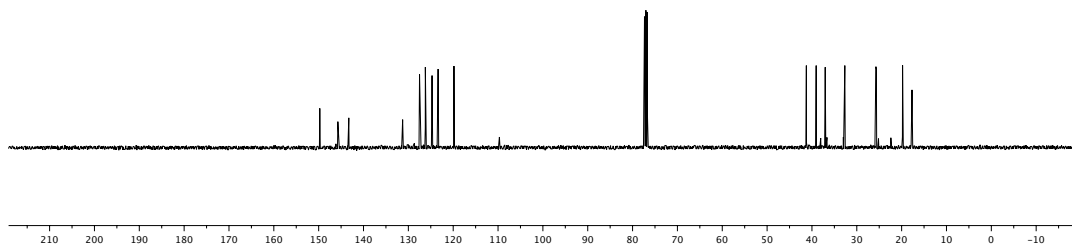

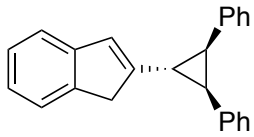

WYH-9-14.10.fid  
 ResearchGroup Echavarren  
 ICIQ\_1H12p8s CDC13 /opt/topspin ywang 77

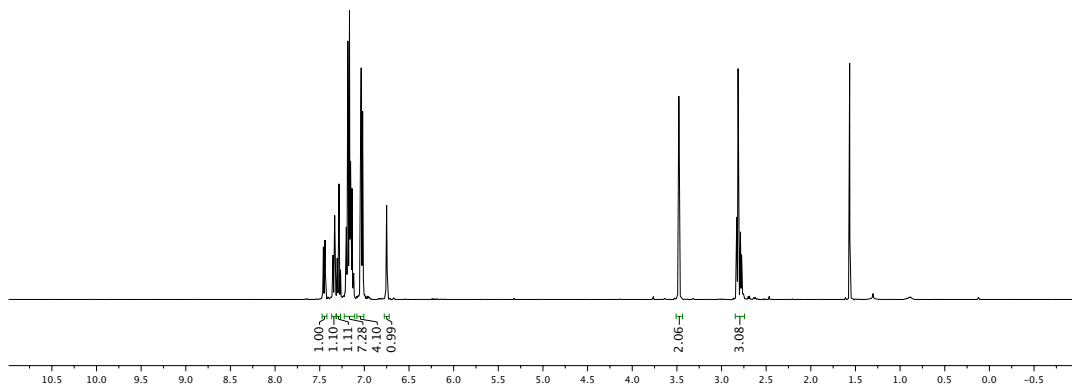

WYH-9-14.11.fid  
 ResearchGroup Echavarren  
 ICIQ\_13C1H128s CDC13 /opt/topspin ywang 77

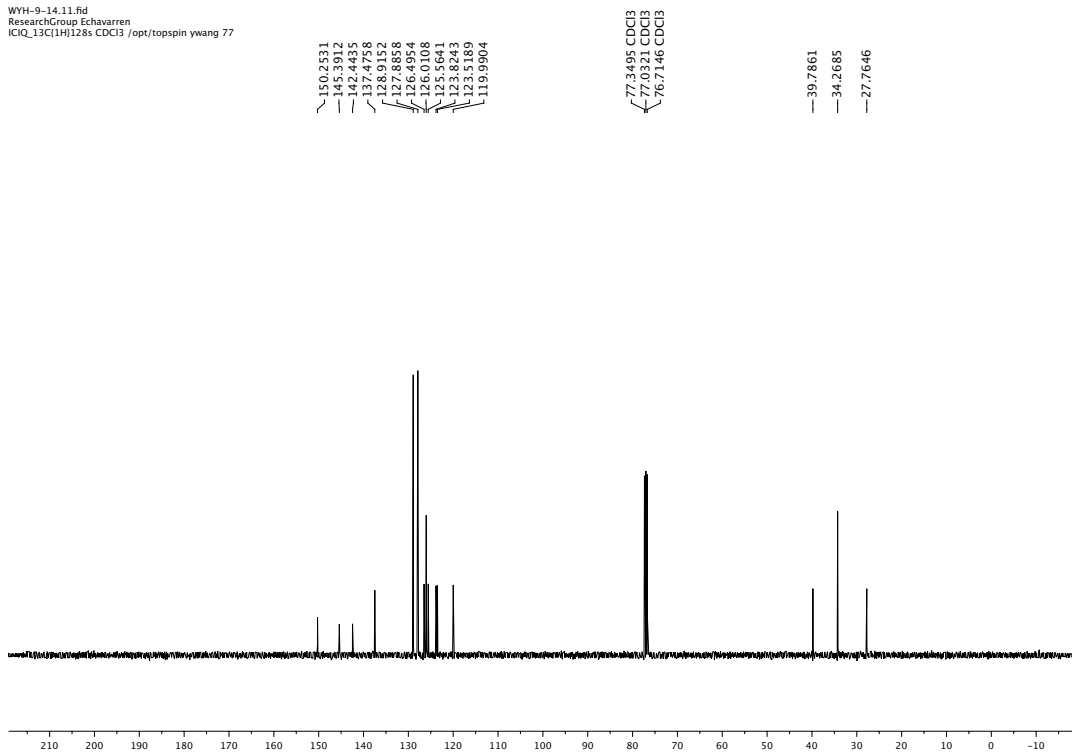

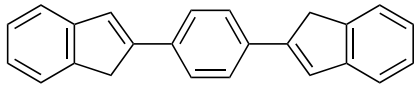

WYH-5-165/2  
proton 398 K

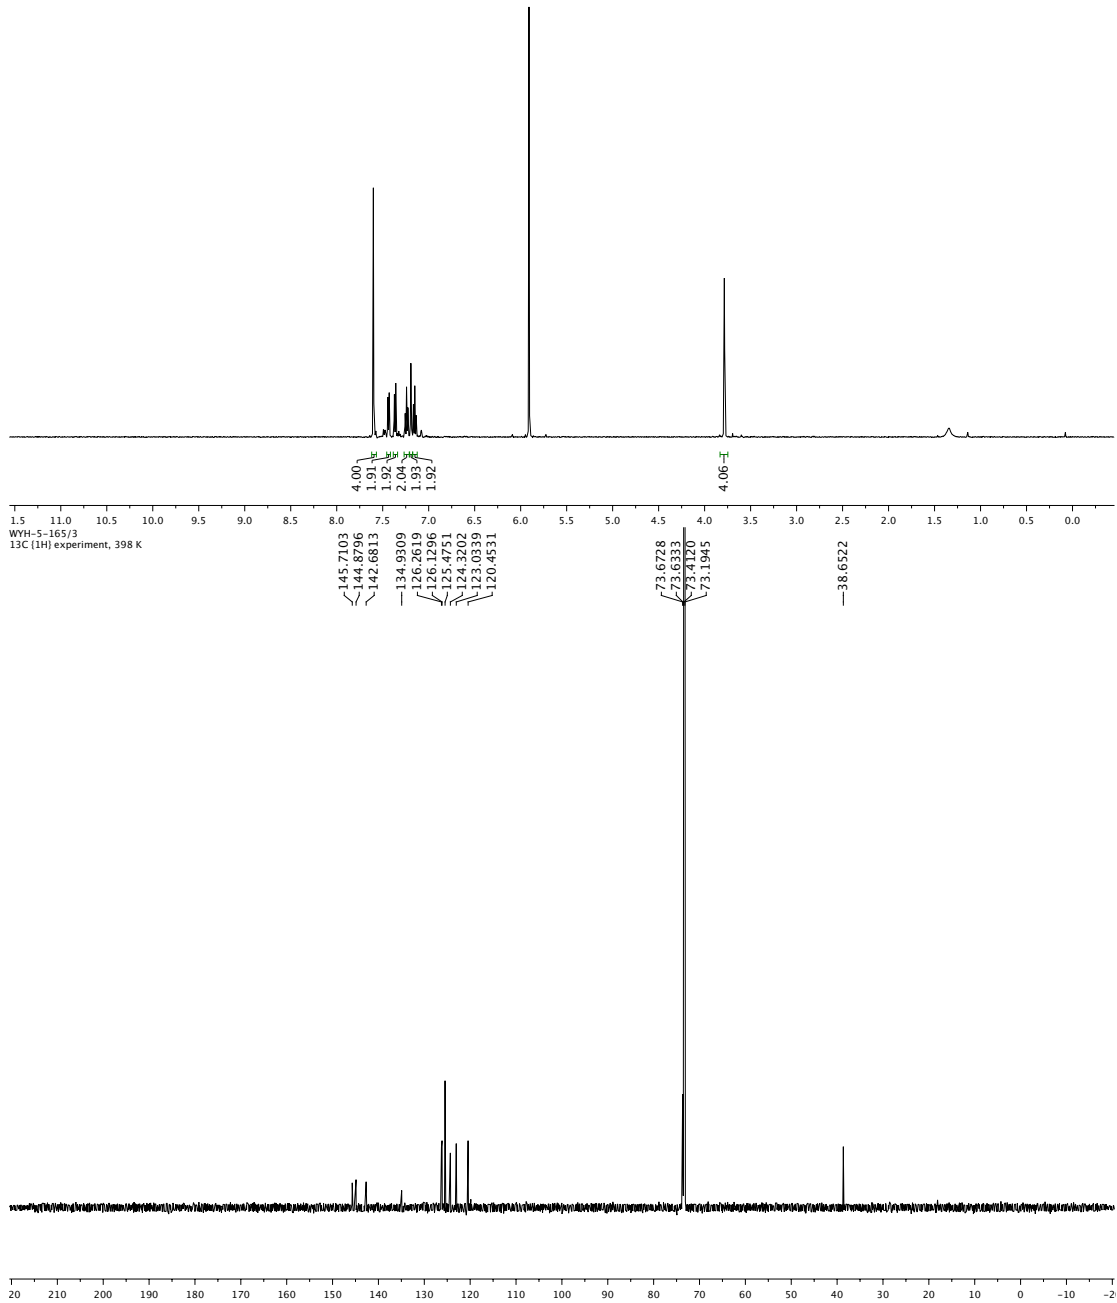

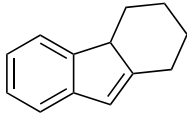

WYH-6-76/10  
 ResearchGroup Echavarren  
 ICIQ\_1H12p8s CDCI3 /opt/topspin ywang 3

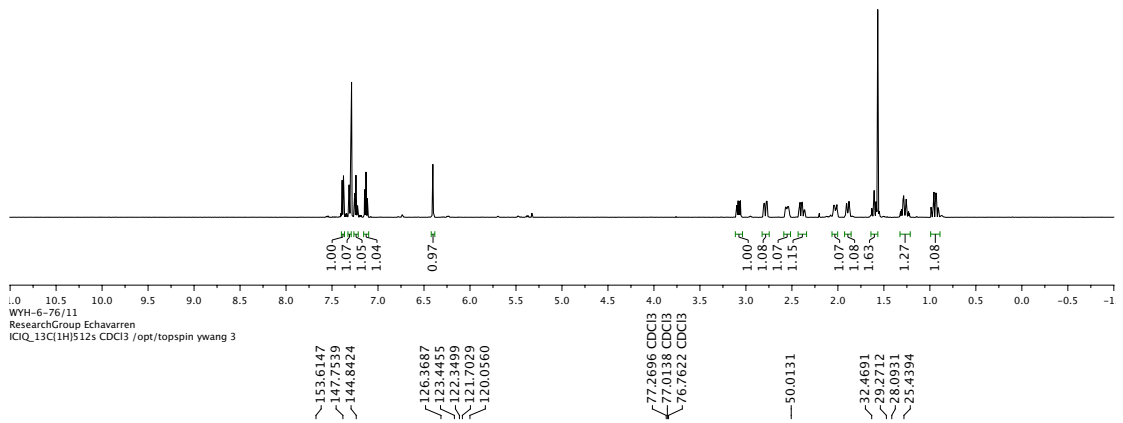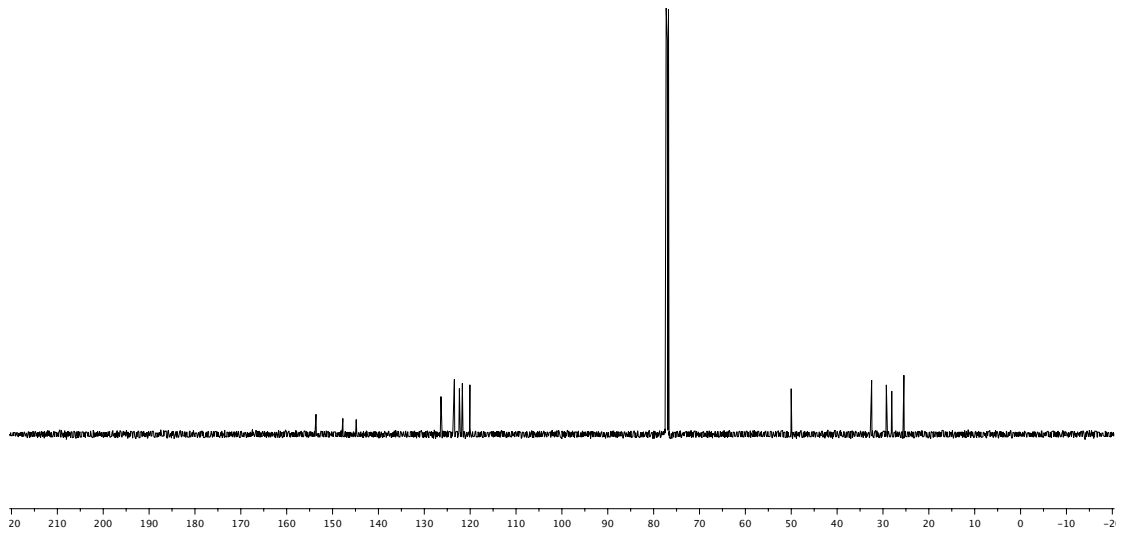

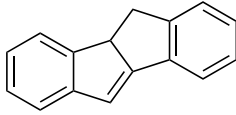

WYH-6-89-N.10.fid  
 ResearchGroup Echavarren  
 ICIQ\_1H12p8s CDC13 /opt/topspin ywang 81

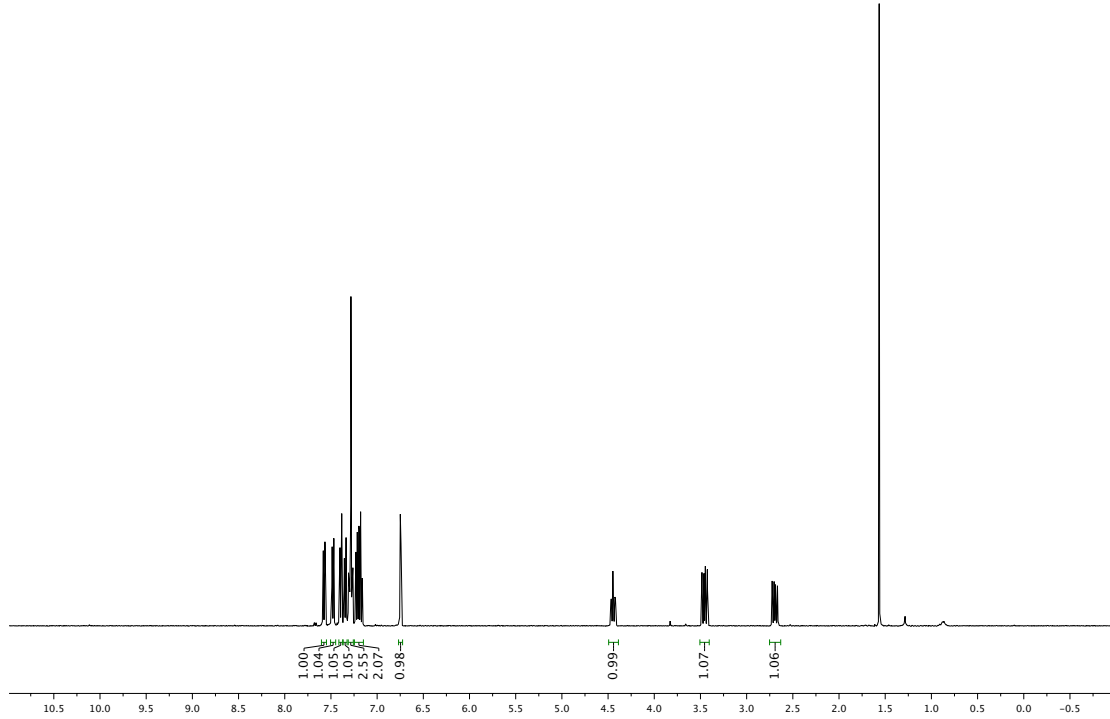

WYH-6-89-N.11.fid  
 ResearchGroup Echavarren  
 ICIQ\_13C1H512s CDC13 /opt/topspin ywang 81

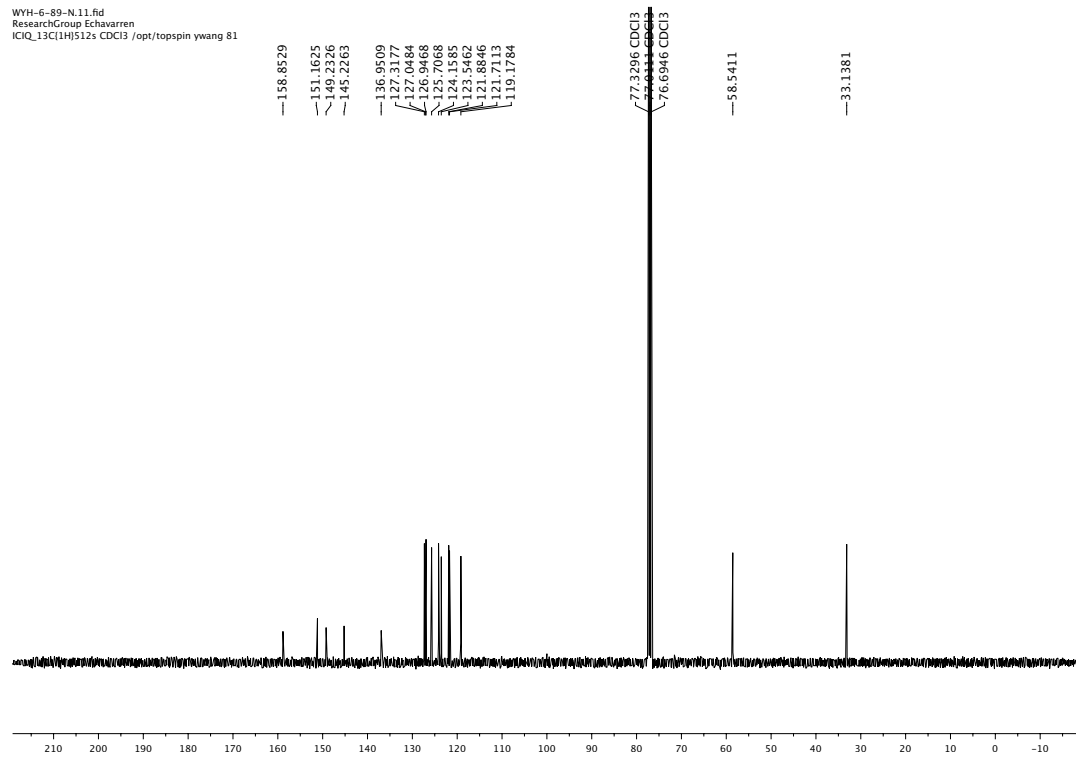

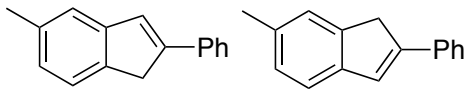

1:1

WYH-5-116/10  
 ResearchGroup Echavarren  
 ICIQ\_1H12p8s CDCI3 /opt/topspin ywang 1

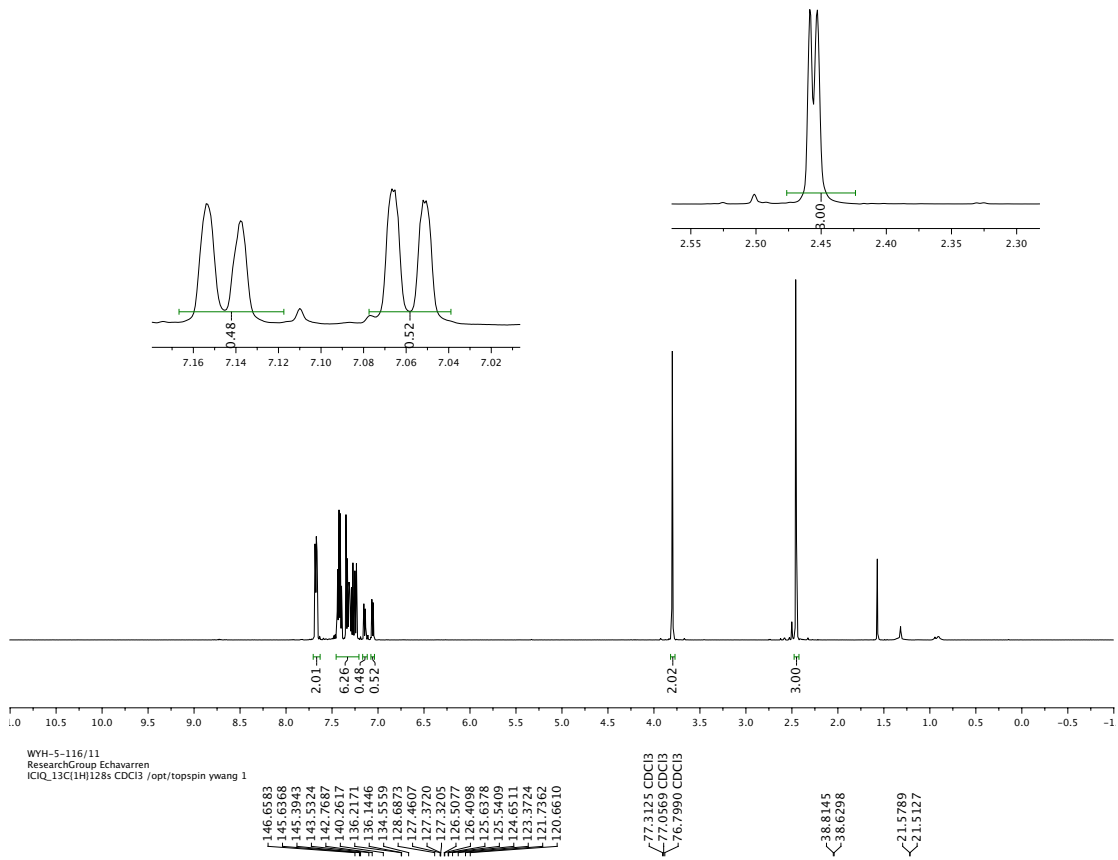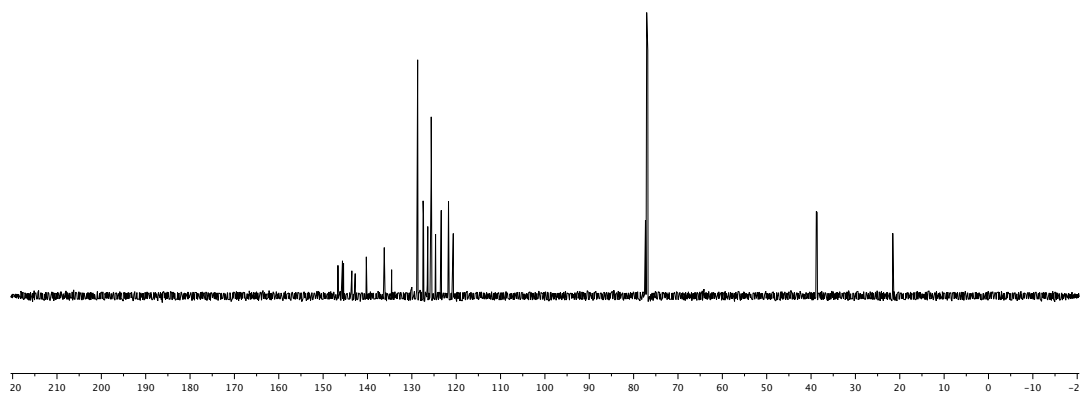

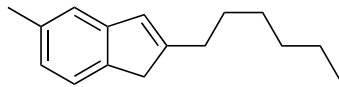

+

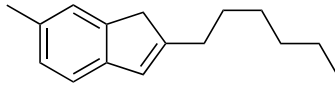

1:1

WYH-9-73.10.fid  
 ResearchGroup Echavarren  
 ICIQ\_1H12p8s CDCI3 /opt/topspin ywang 108

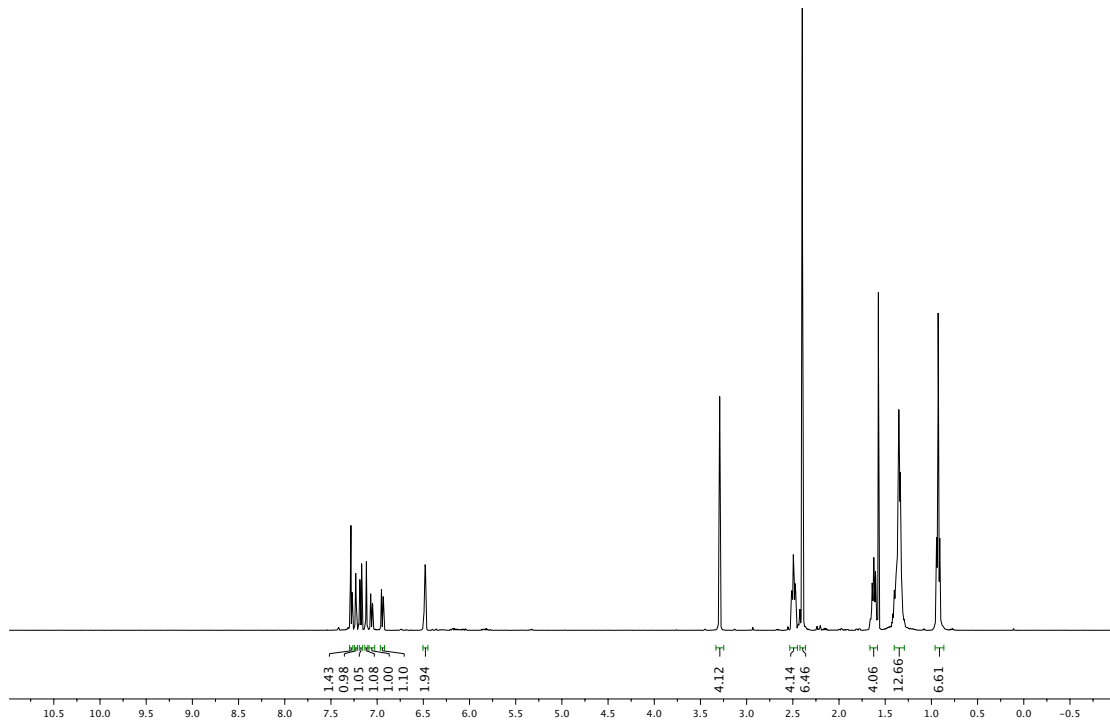

WYH-9-73.11.fid  
 ResearchGroup Echavarren  
 ICIQ\_13C11H512s CDCI3 /opt/topspin ywang 108

151.3308  
 149.9329  
 146.0160  
 143.4666  
 143.0856  
 140.1605  
 135.7324  
 133.0019  
 128.9871  
 125.7851  
 124.3767  
 124.2346  
 123.0411  
 120.6120  
 119.4255

77.3388 CDCI3  
 77.0214 CDCI3  
 76.7042 CDCI3

40.8389  
 40.6374  
 31.7676  
 31.3095  
 31.2483  
 29.1507  
 29.0523  
 28.5115

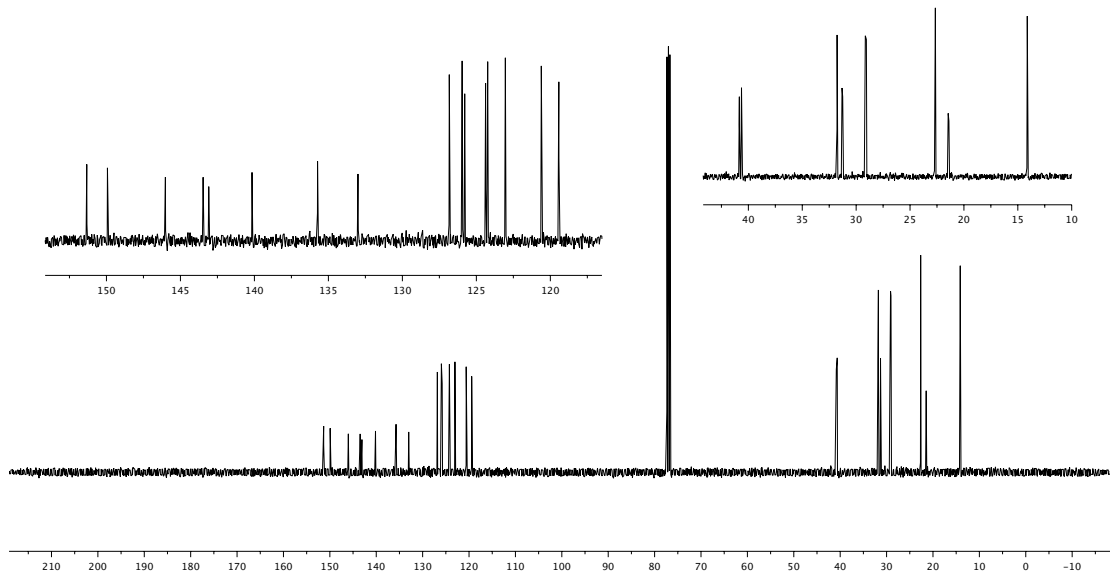

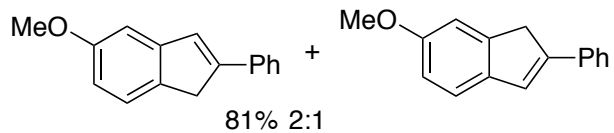

WYH-9-98.10.fid  
 ResearchGroup Echavarren  
 ICIQ\_1H12p8s CDC13 /opt/topspin ywag 92

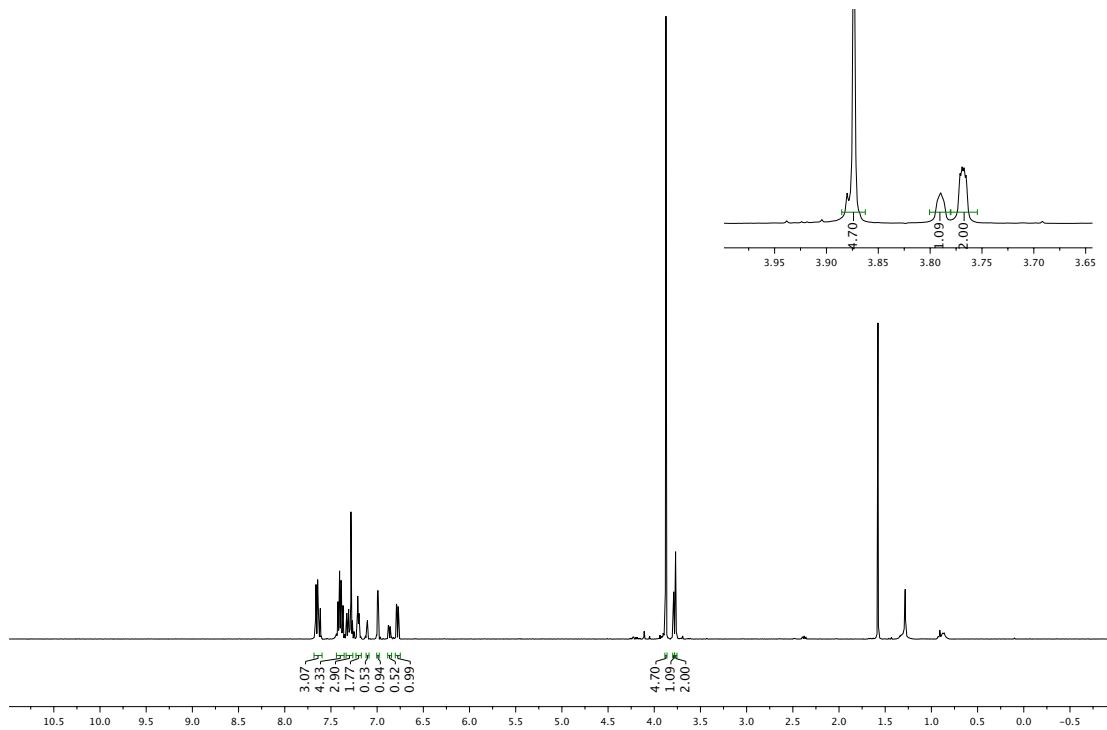

WYH-9-98-N.11.fid  
 ResearchGroup Echavarren  
 ICIQ\_13C1H4512s CDC13 /opt/topspin ywag 97

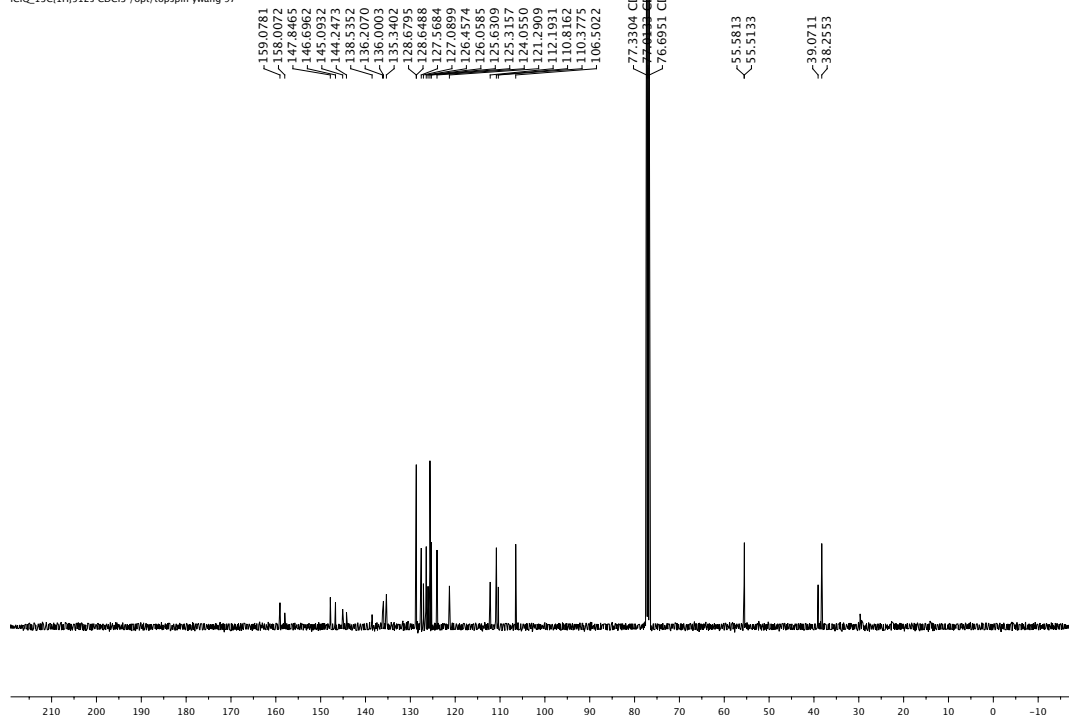



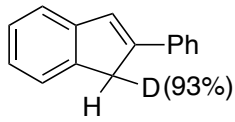

WYH-4-143/10  
 ResearchGroup Echavarren  
 ICIQ\_1H12p8s CDCl3 /opt/topspin ywang 13

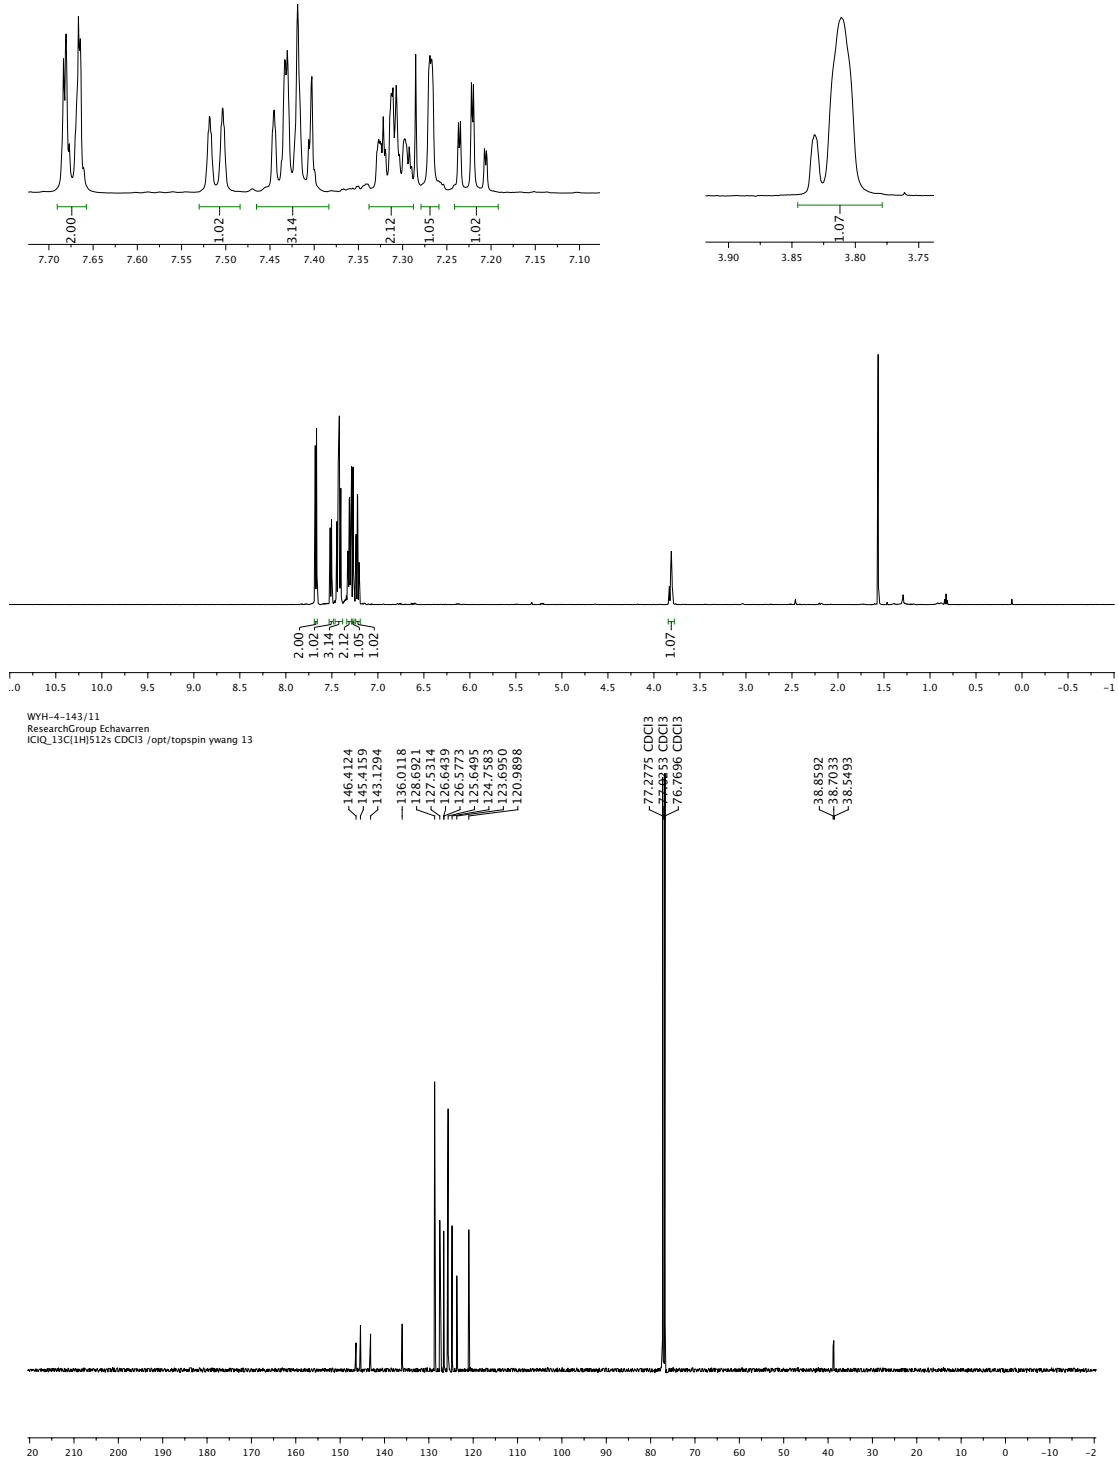

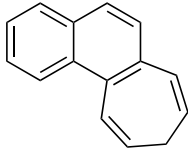

WYH-5-139-1-N/10  
 ResearchGroup Echavarren  
 ICIQ\_1H12p8s CDCl3 /opt/topspin ywang 41

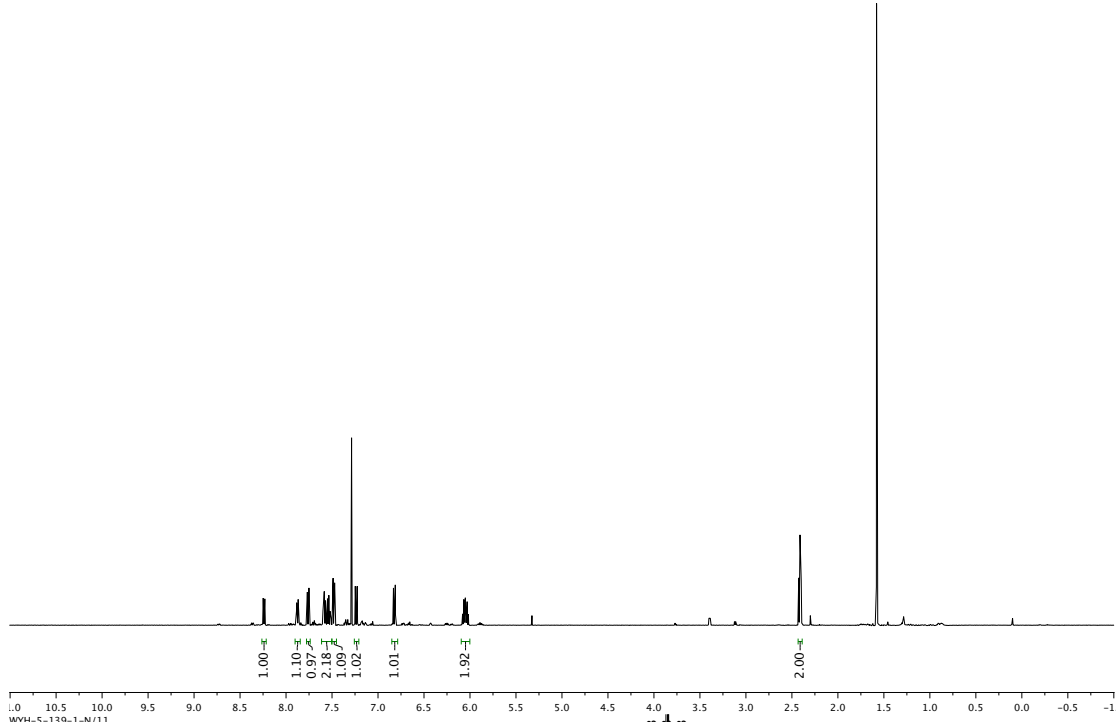

WYH-5-139-1-N/11  
 ResearchGroup Echavarren  
 ICIQ\_13C1H1512s CDCl3 /opt/topspin ywang 41

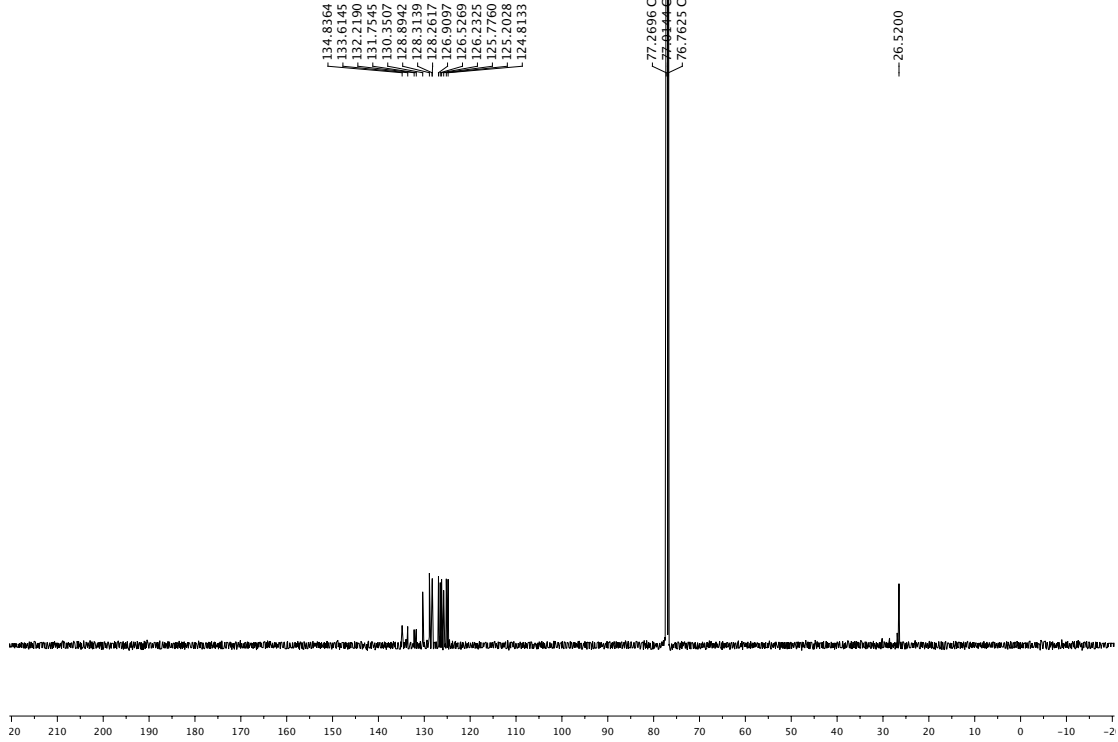

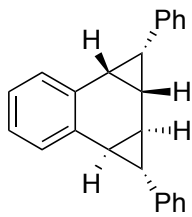

WYH-6-132-3-N.10.fid  
 ResearchGroup Echavarren  
 ICIQ\_1H12p8s CDCI3 /opt/topspin ywang 15

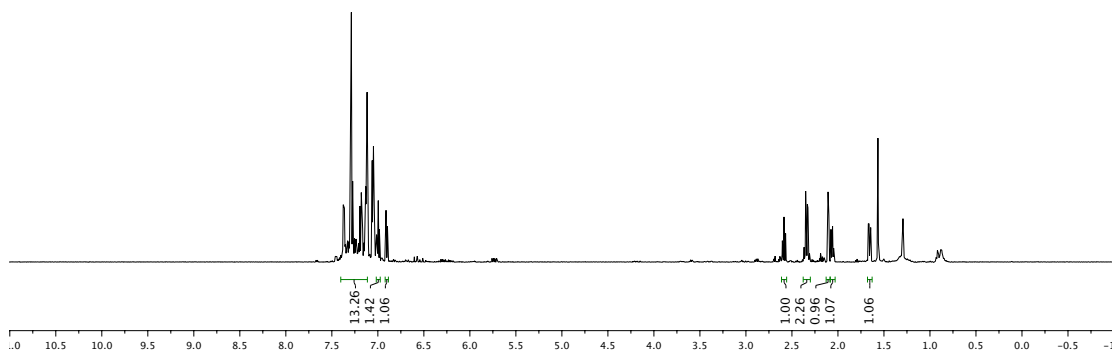

WYH-6-132-3.11.fid  
 ResearchGroup Echavarren  
 ICIQ\_13C1H512s CDCI3 /opt/topspin ywang 67

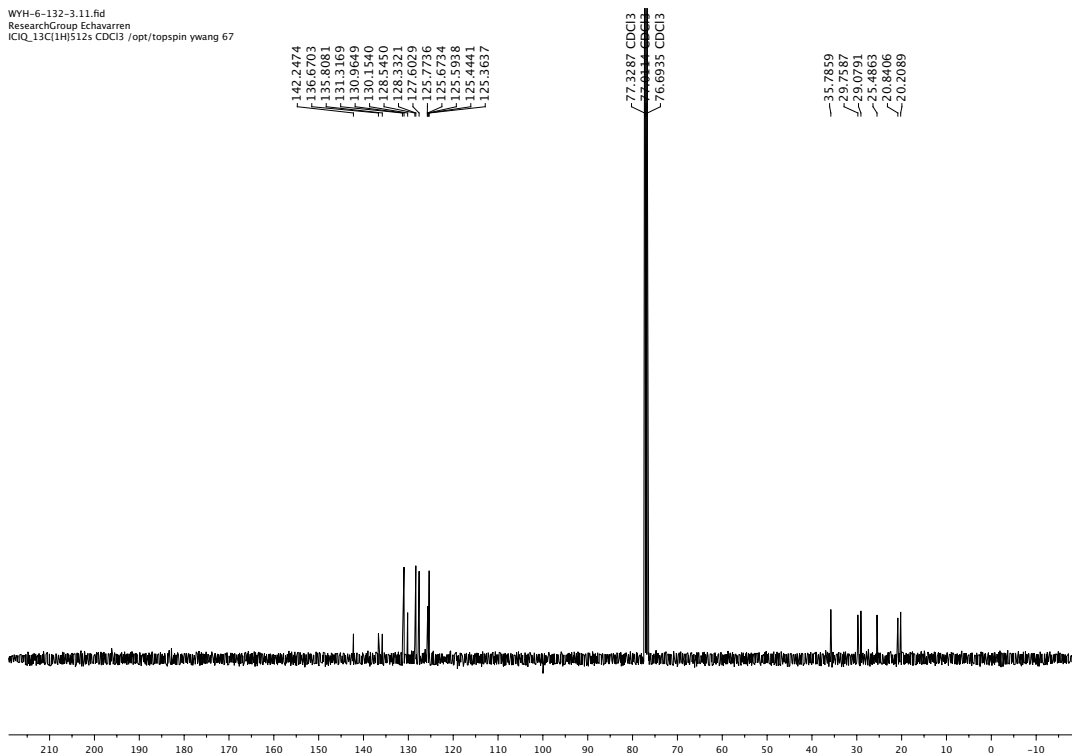

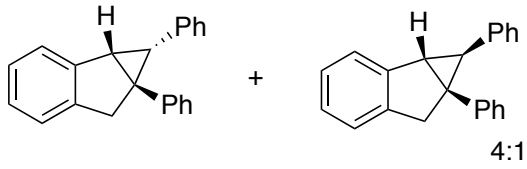

WYH-6-83-N.10.fid  
 ResearchGroup Echavarren  
 ICIQ\_1H12p8s CDCI3 /opt/topspin ywang 86

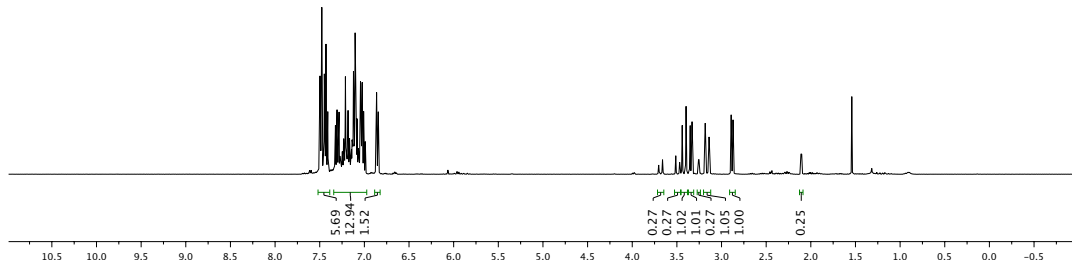

WYH-6-83-N.11.fid  
 ResearchGroup Echavarren  
 ICIQ\_13C1HJ512s CDCI3 /opt/topspin ywang

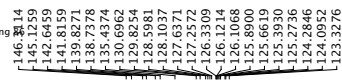

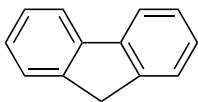

WYH-4-34-1/10  
 ResearchGroup Echavarren  
 ICIQ\_1H12p8s CDCl3 /opt/topspin ywang 70

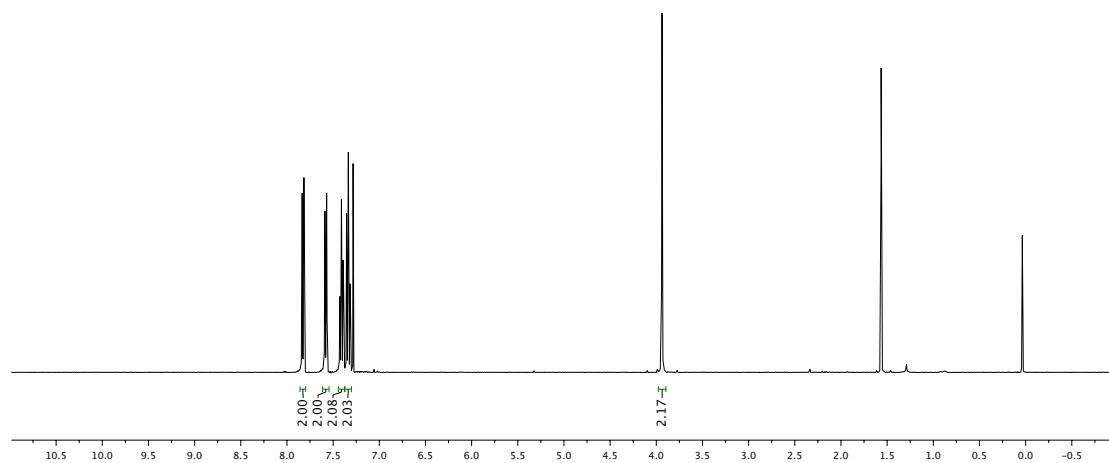

WYH-4-34-1/11  
 ResearchGroup Echavarren  
 ICIQ\_13C1H4512s CDCl3 /opt/topspin ywang 70

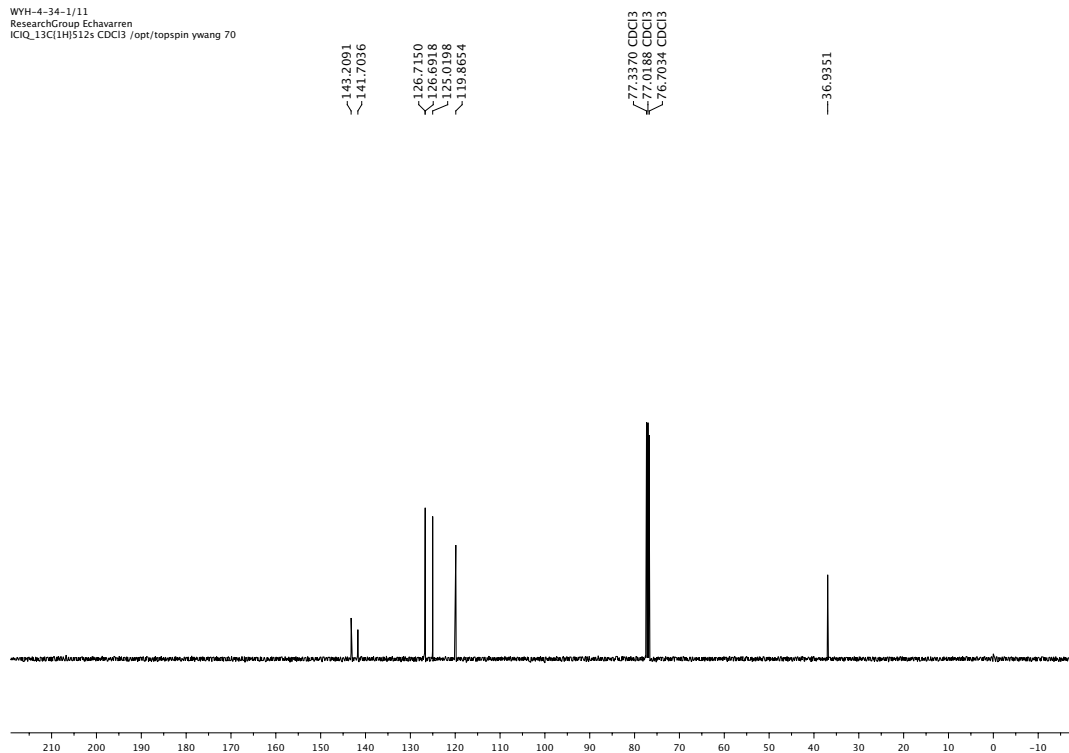

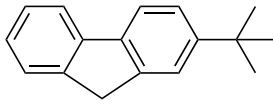

WYH-4-44-N1/1  
 ResearchGroup Echavarren  
 K1Q\_1H20p6s CDCl3 (C:\Bruker\TopSpin3.1) ywang 49

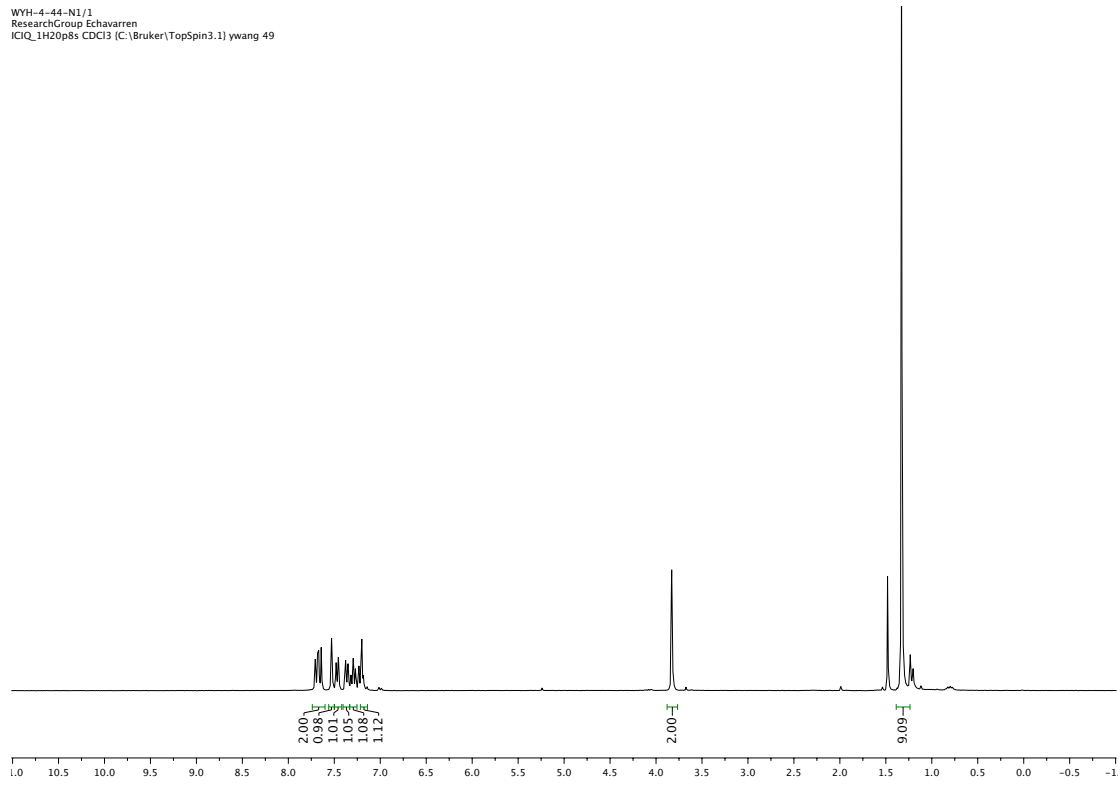

WYH-4-44-N1/2  
 ResearchGroup Echavarren  
 K1Q\_13C11H512s CDCl3 (C:\Bruker\TopSpin3.1) ywang 49

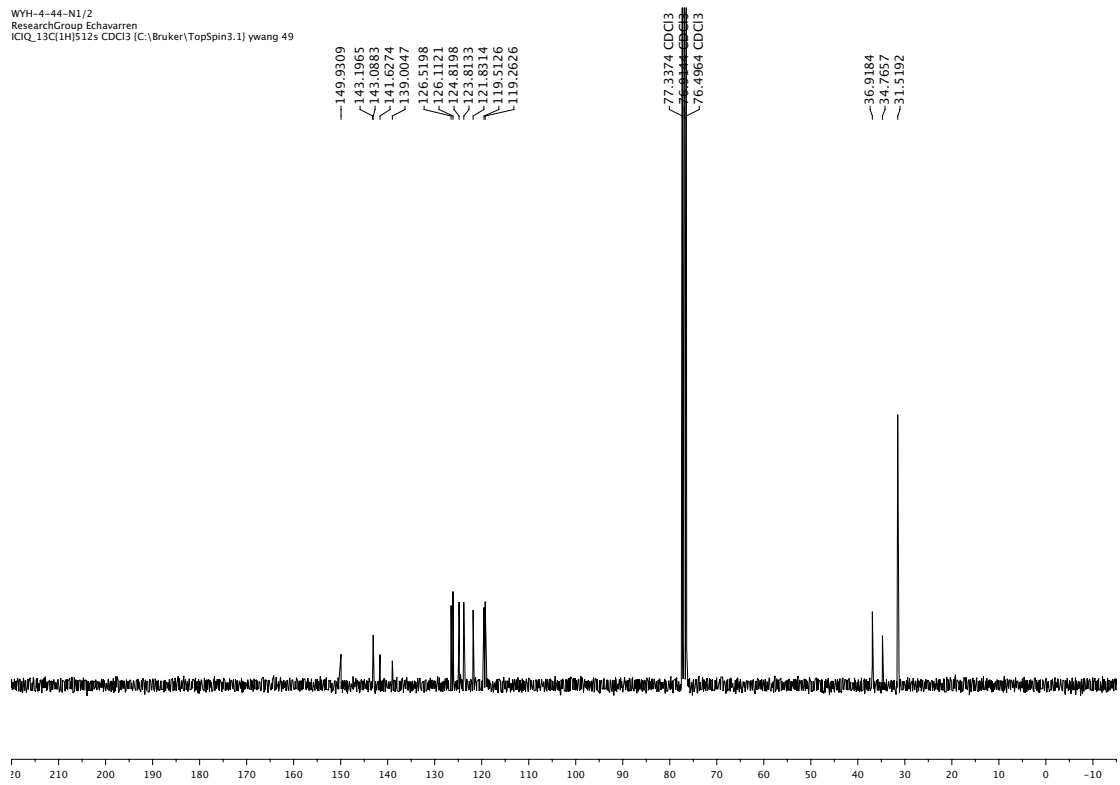

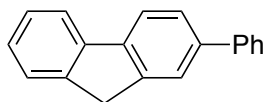

WYH-4-45/10  
 ResearchGroup Echavarren  
 ICIQ\_1H12p8s CDCl3 /opt/topspin ywang 70

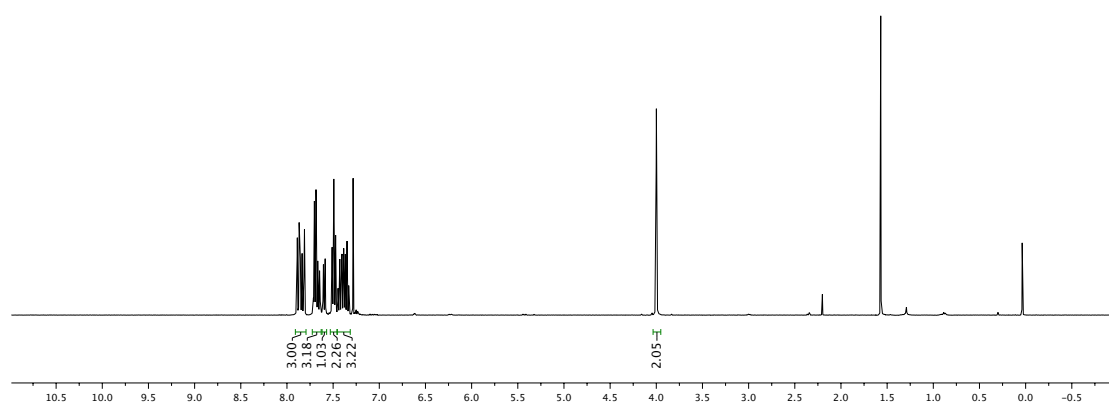

WYH-4-45/11  
 ResearchGroup Echavarren  
 ICIQ\_13C1H512s CDCl3 /opt/topspin ywang 70

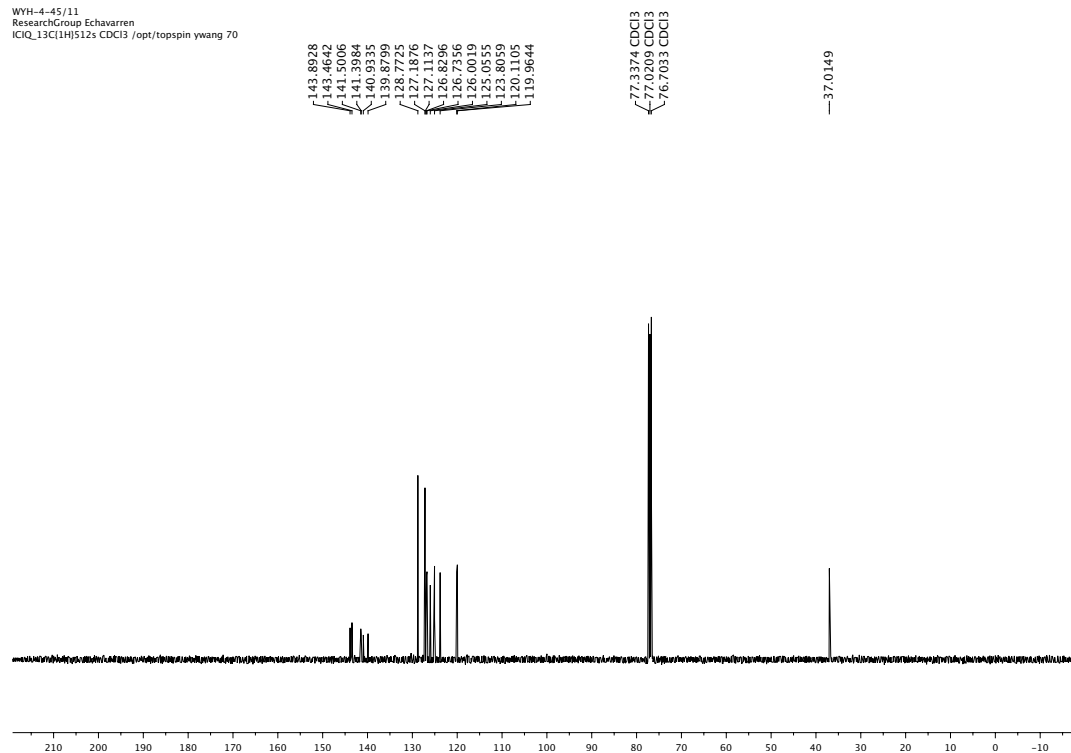

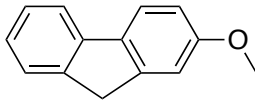

WYH-4-48/10  
ResearchGroup Echavarren  
ICIQ\_1H12p8s CDCl3 /opt/topspin ywang 31

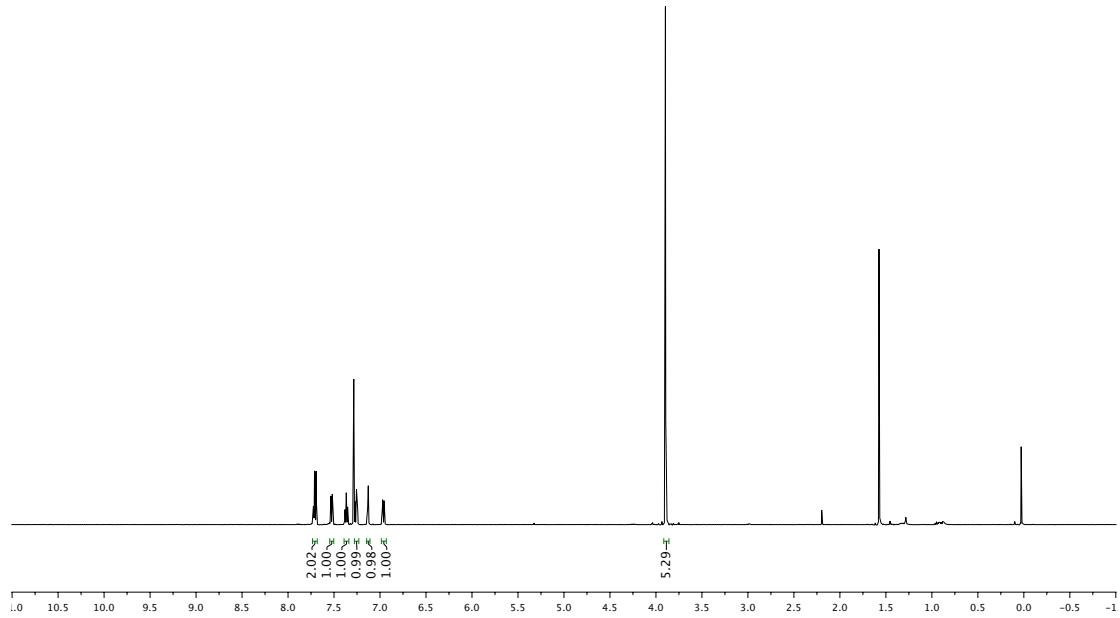

WYH-4-48/11  
ResearchGroup Echavarren  
ICIQ\_13C11H512s CDCl3 /opt/topspin ywang 31

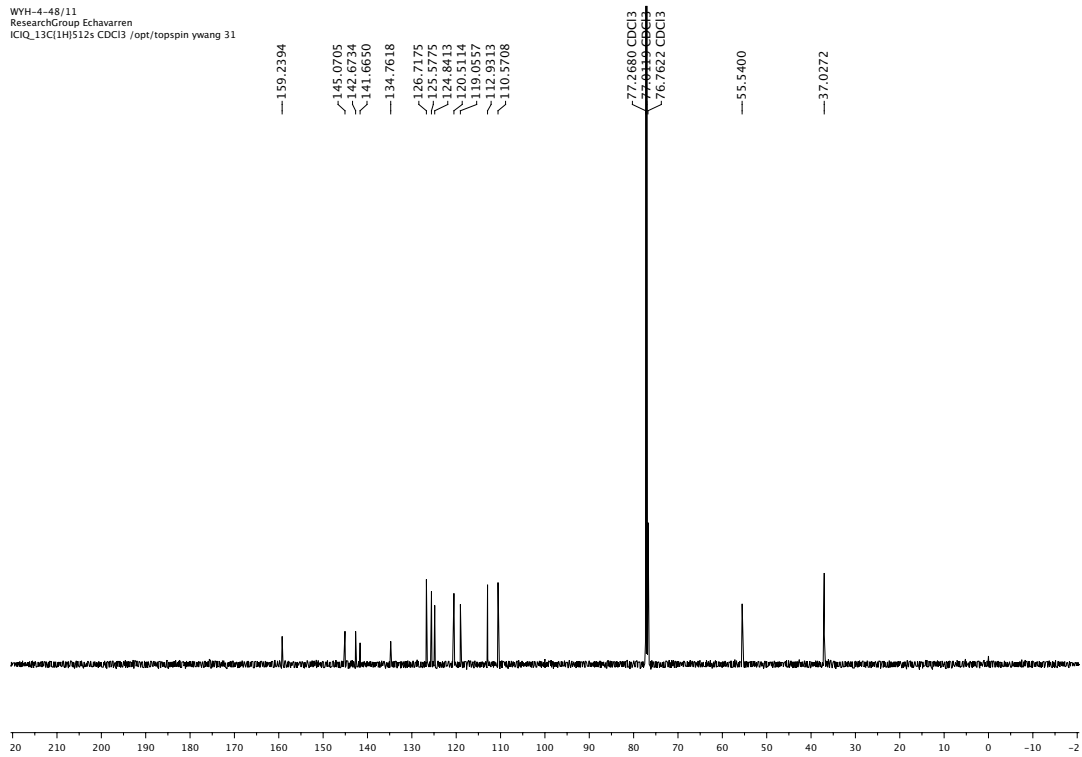



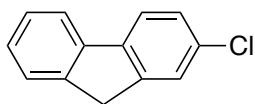

WYH-4-57/1  
1H Experiment

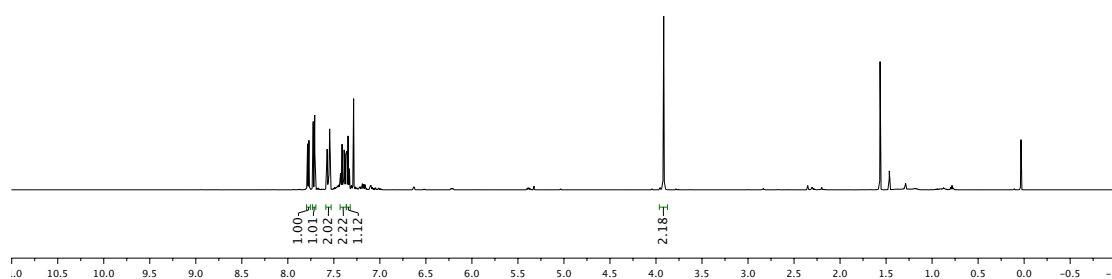

WYH-4-57/2  
13C{1H} Experiment

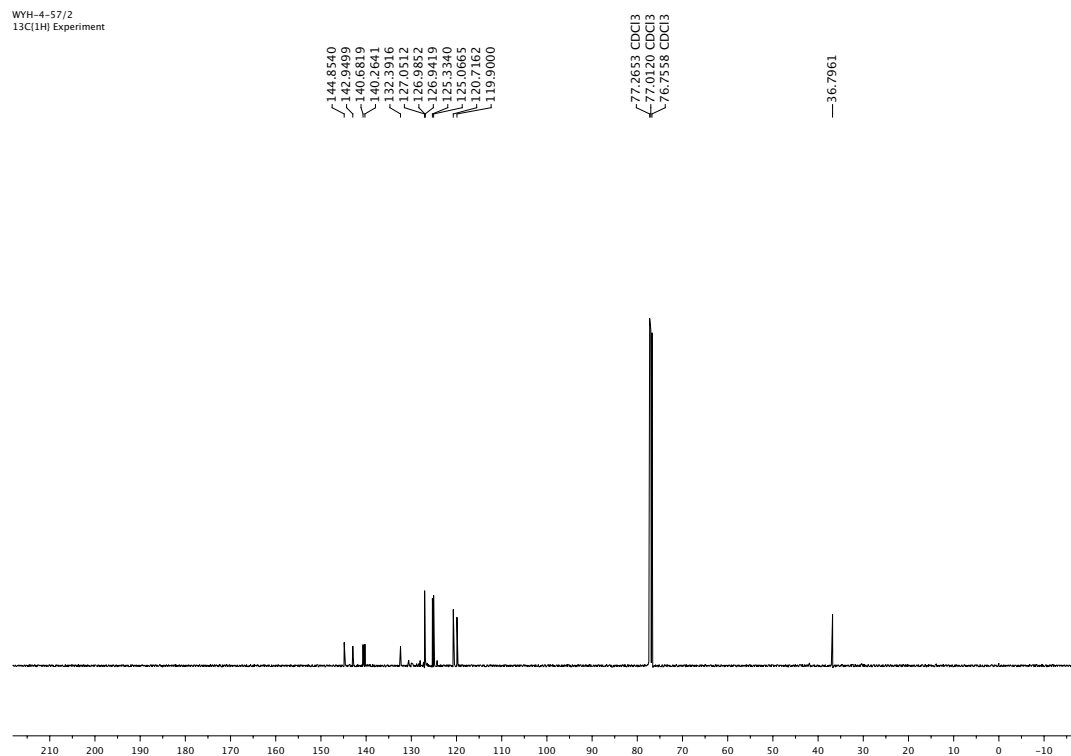

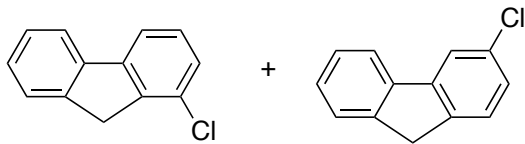

1.2 : 1

WYH-4-58/10  
 ResearchGroup Echavarren  
 ICIQ\_1H12p8s CDC13 /opt/topspin ywang 112

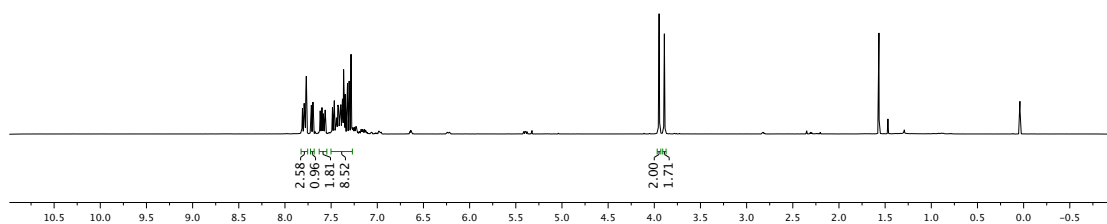

WYH-4-58/11  
 ResearchGroup Echavarren  
 ICIQ\_13C1H512s CDC13 /opt/topspin ywang 112

143.6969  
 143.3336  
 142.6397  
 141.3764  
 141.1756  
 140.6053  
 128.4743  
 127.3913  
 126.9498  
 126.6701  
 126.6194  
 125.9870  
 125.3414  
 120.1237  
 118.2116

77.3416 CDCB  
 77.0233 CDCB  
 76.7042 CDCB

36.6437  
 36.5205

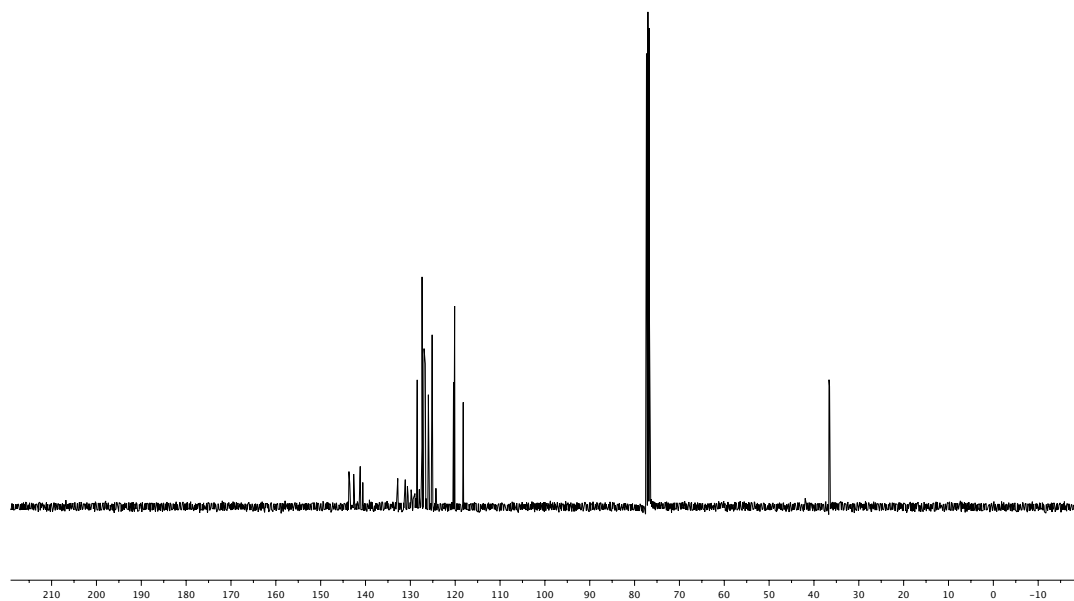

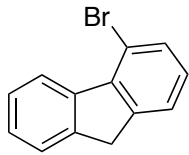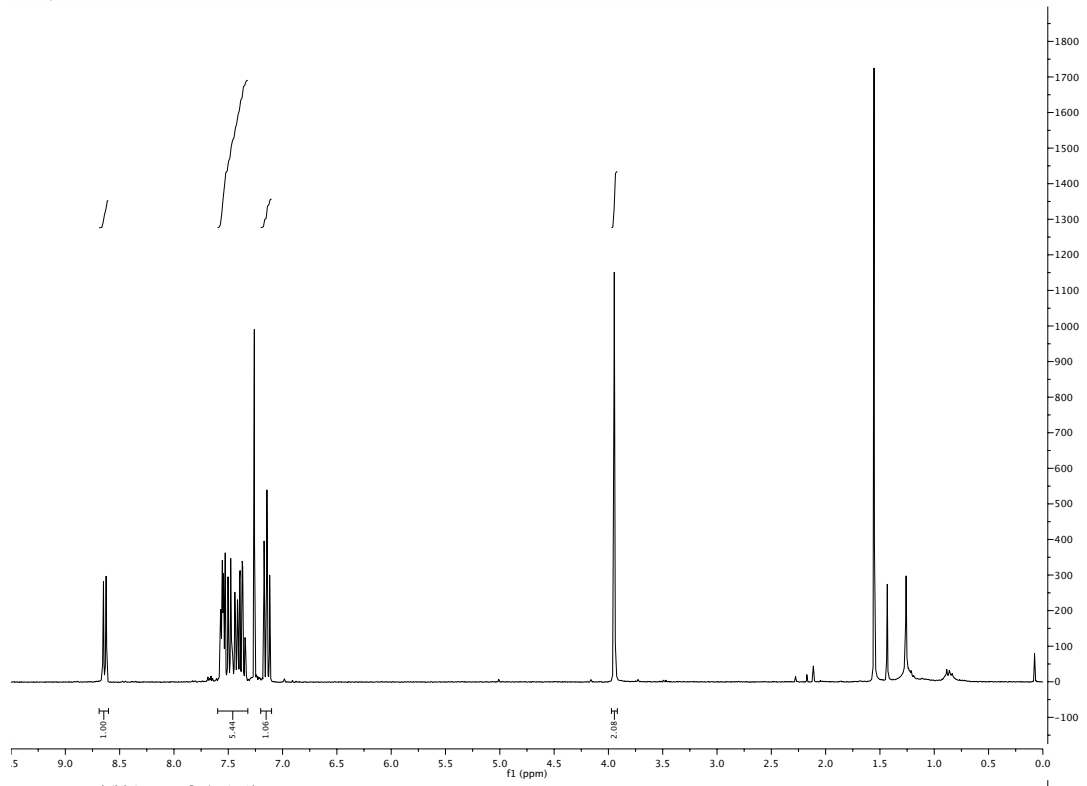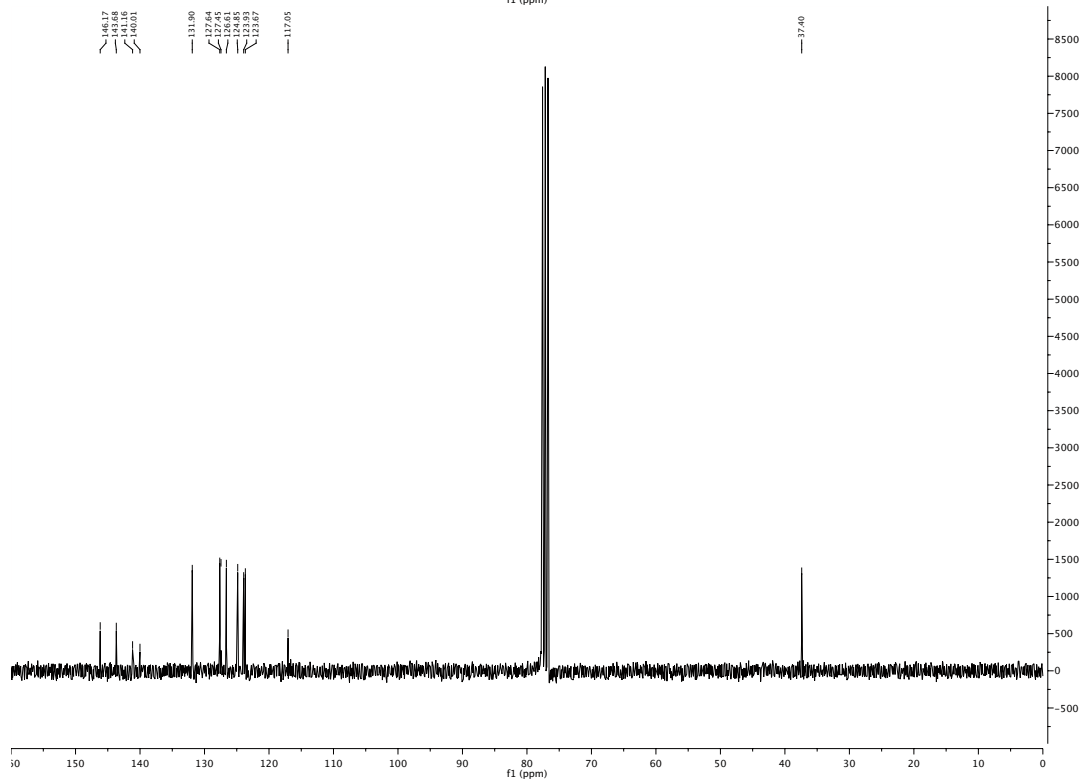

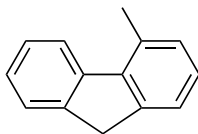

WYH-4-67/10  
 ResearchGroup Echavarren  
 ICIQ\_1H12p8s CDC13 /opt/topspin ywang 97

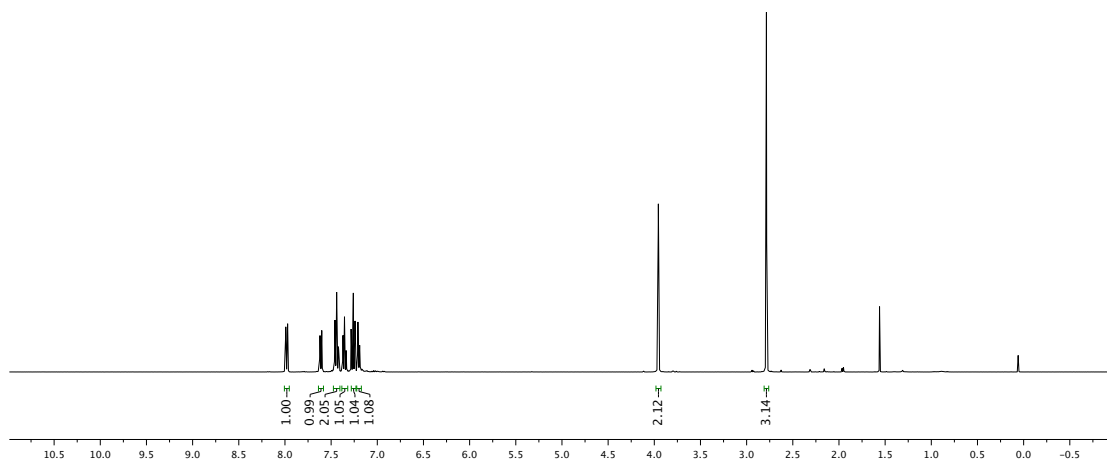

WYH-4-67/11  
 ResearchGroup Echavarren  
 ICIQ\_13C11H1512s CDC13 /opt/topspin ywang 97

143.6819  
 143.5971  
 142.7070  
 139.7980  
 135.0839  
 133.6262  
 126.4145  
 126.0298  
 124.8877  
 123.1292  
 122.4518

77.3607 CDC13  
 77.0450 CDC13  
 76.7262 CDC13

37.1040

21.1199

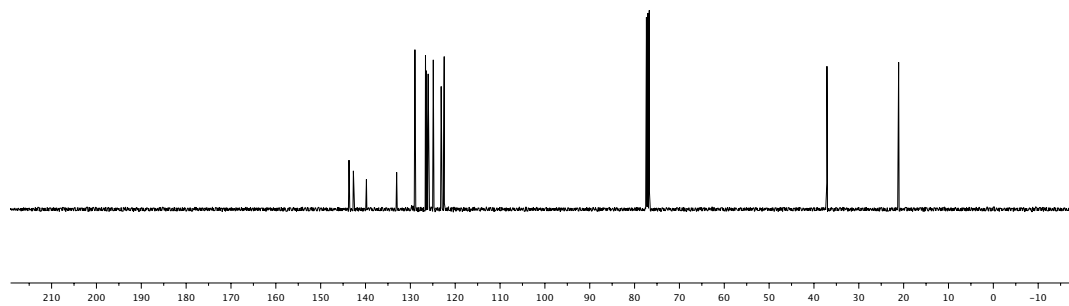

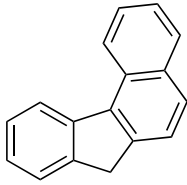

PM4-084-F2-4/10  
 ResearchGroup Echavarren  
 PM4-084 F2-4  
 ICIQ\_1H12p32s CDCI3 /opt/topspin pmcgongal 32

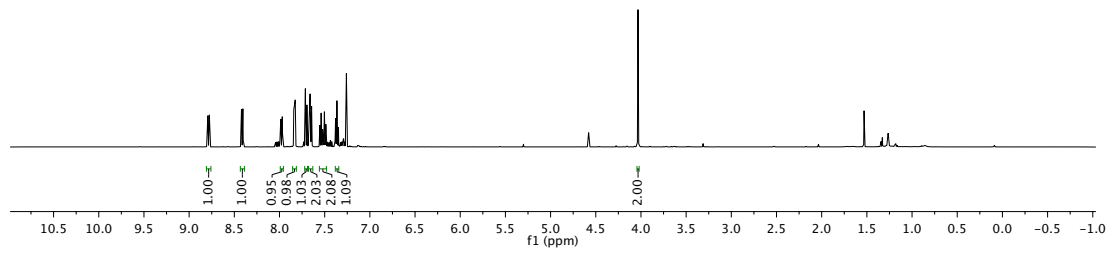

PM4-084-F2-4/11  
 ResearchGroup Echavarren  
 PM4-084 F2-4  
 ICIQ\_13C1H1512s CDCI3 /opt/topspin pmcgongal 32

144.36  
 142.96  
 142.49  
 136.23  
 133.55  
 129.72  
 127.83  
 127.04  
 126.62  
 125.89  
 125.14  
 125.02  
 123.85  
 123.42  
 123.03

37.93

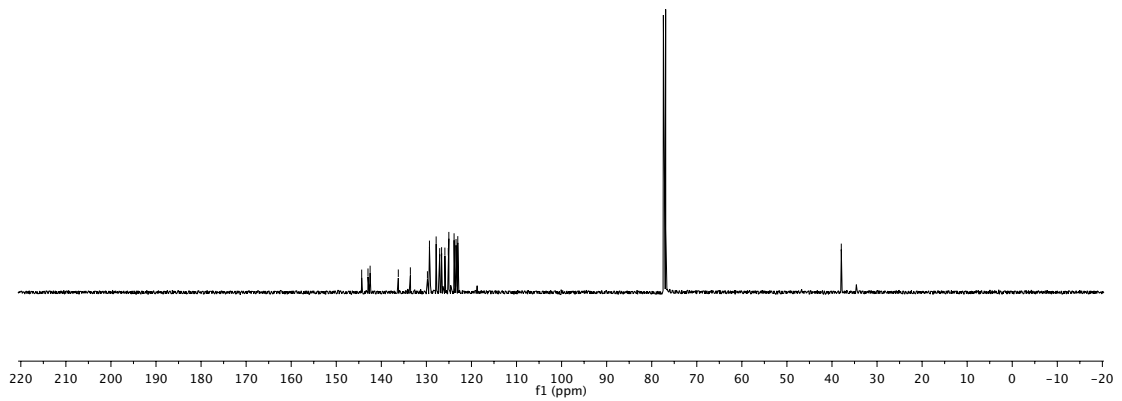

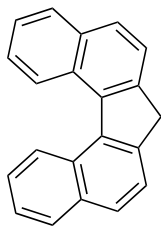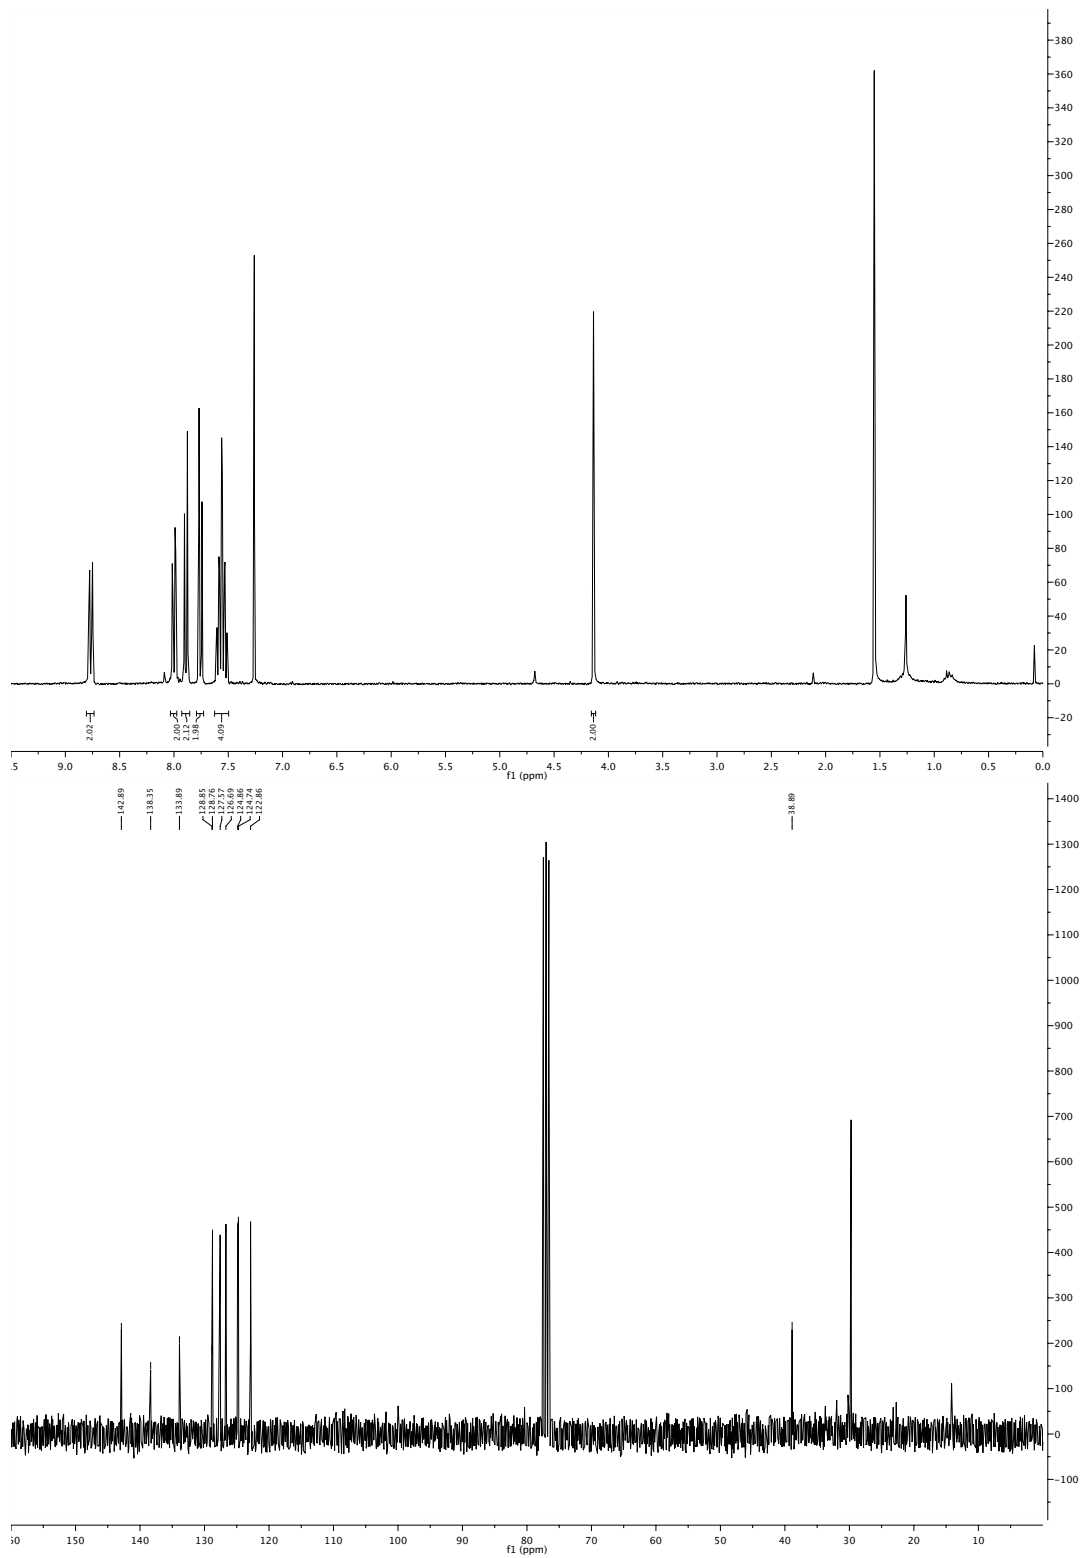

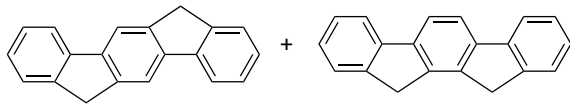

4:1

WYH-6-77-5-2.10.fid  
 ResearchGroup Echavarren  
 ICIQ\_1H12p8s CDC13 /opt/topspin ywang 77

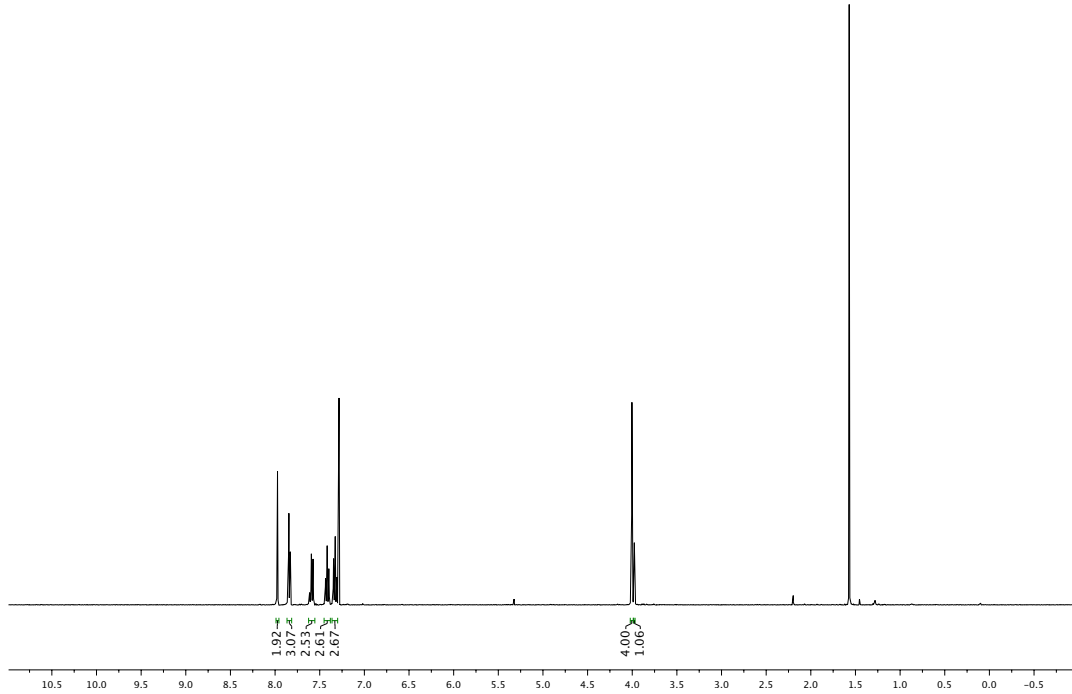

WYH-6-77-5-2.11.fid  
 ResearchGroup Echavarren  
 ICIQ\_13C1HJ512s CDC13 /opt/topspin ywang 77

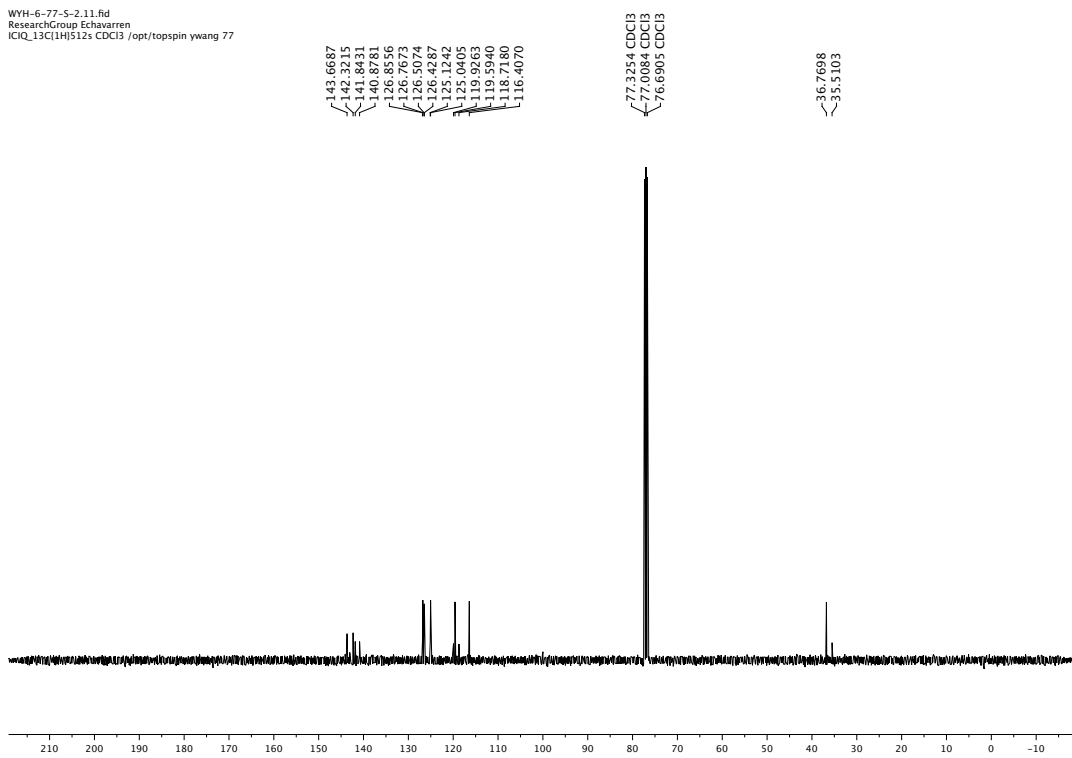





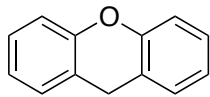

WYH-6-104-1.10.fid  
ResearchGroup Echavarren  
ICIQ\_1H12p8s CDCI3 /opt/topspin ywang 26

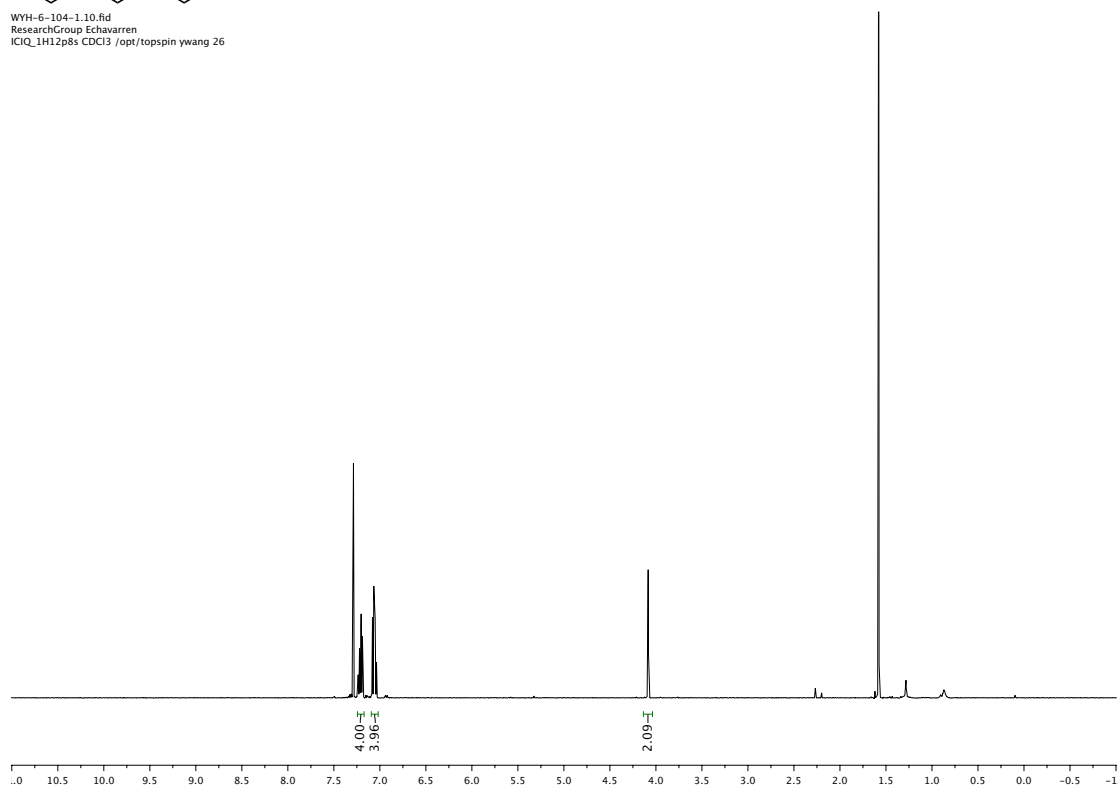

WYH-6-104-1.11.fid  
ResearchGroup Echavarren  
ICIQ\_13C1HJ512s CDCI3 /opt/topspin ywang 26

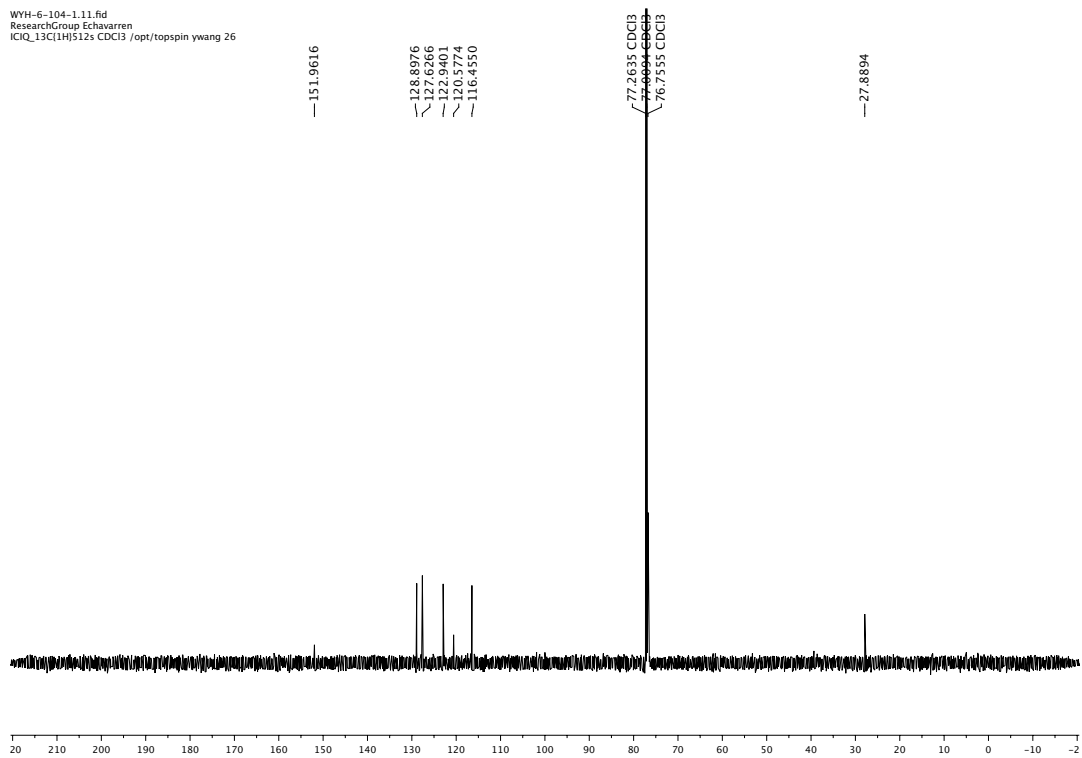

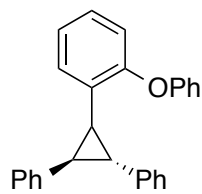

WYH-9-57.10.fid  
 ResearchGroup Echavarren  
 ICIQ\_1H12p8s CDCl3 /opt/topspin ywang 113

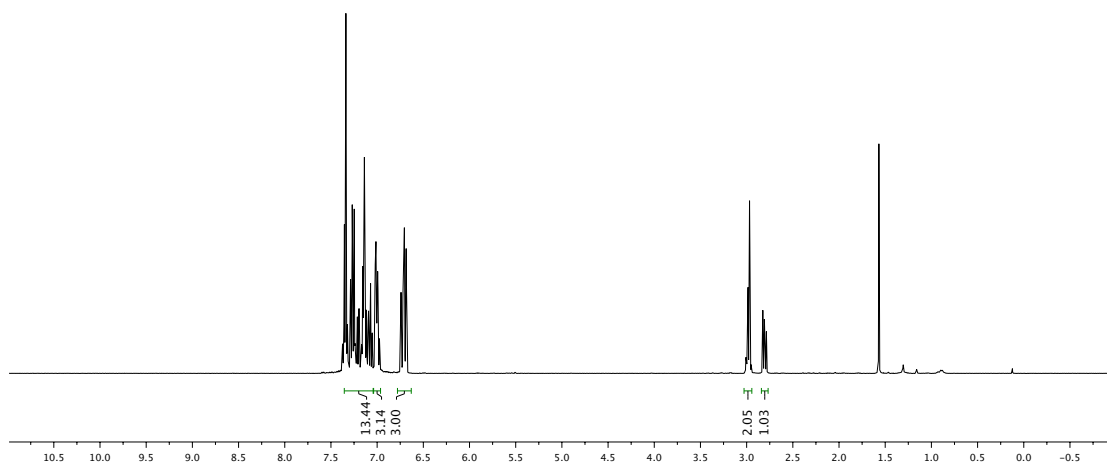

WYH-9-57.11.fid  
 ResearchGroup Echavarren  
 ICIQ\_13C1H512s CDCl3 /opt/topspin ywang 113

157.2652  
 156.4531  
 141.8402  
 136.2327  
 132.5512  
 129.5512  
 128.4603  
 128.3892  
 128.1460  
 127.7322  
 127.5287  
 126.5943  
 126.0613  
 125.7271  
 125.6079  
 118.5243  
 118.1563

77.3515 CDCl3  
 77.0342 CDCl3  
 76.7178 CDCl3

34.2954  
 30.2733  
 29.6595

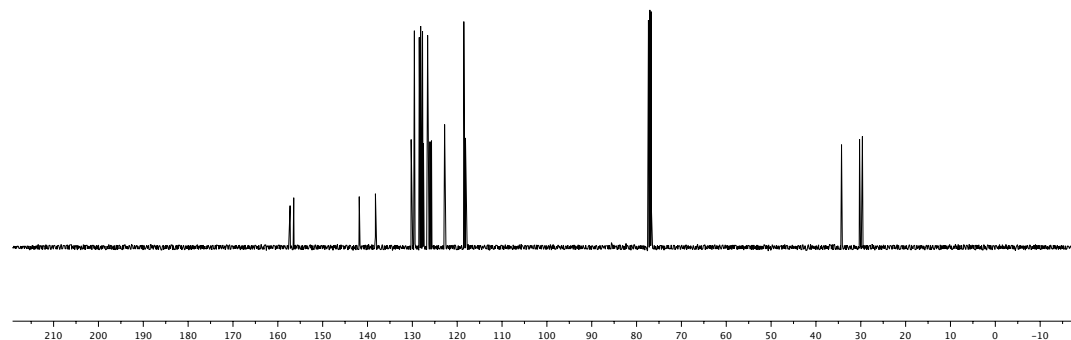

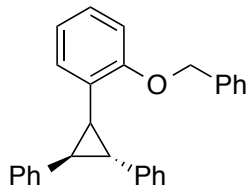

WYH-9-54.10.fid  
 ResearchGroup Echavarren  
 ICIQ\_1H12p8s CDCI3 /opt/topspin ywang 34

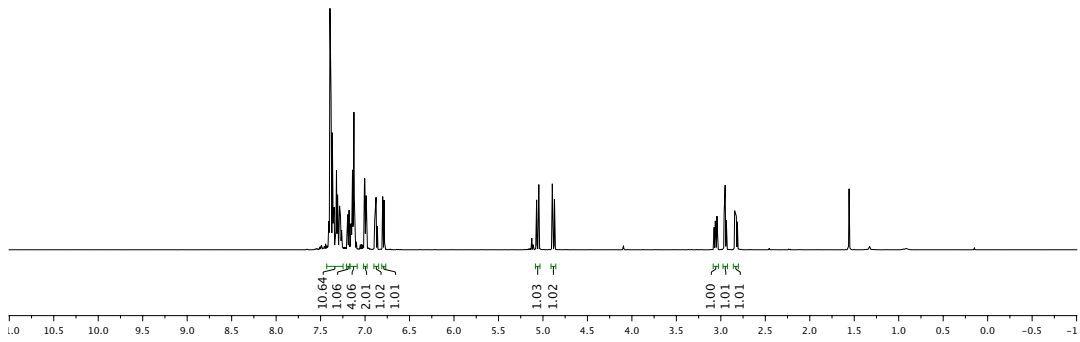

WYH-9-54.11.fid  
 ResearchGroup Echavarren  
 ICIQ\_13C1HJ512s CDCI3 /opt/topspin ywang 34

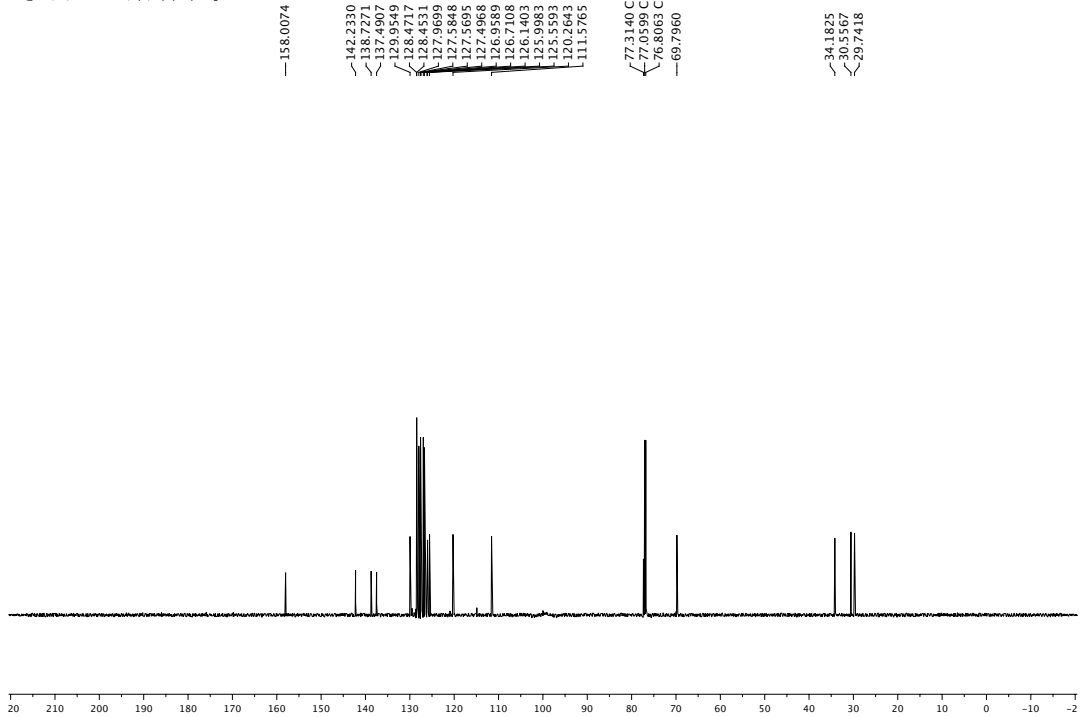

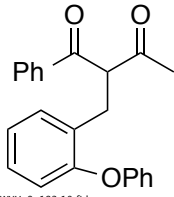

WYH-9-183.10.fid  
 ResearchGroup Echavarren  
 ICIQ\_1H20p8s CDCl3 [C:\Bruker\TopSpin3.1] ywang 35

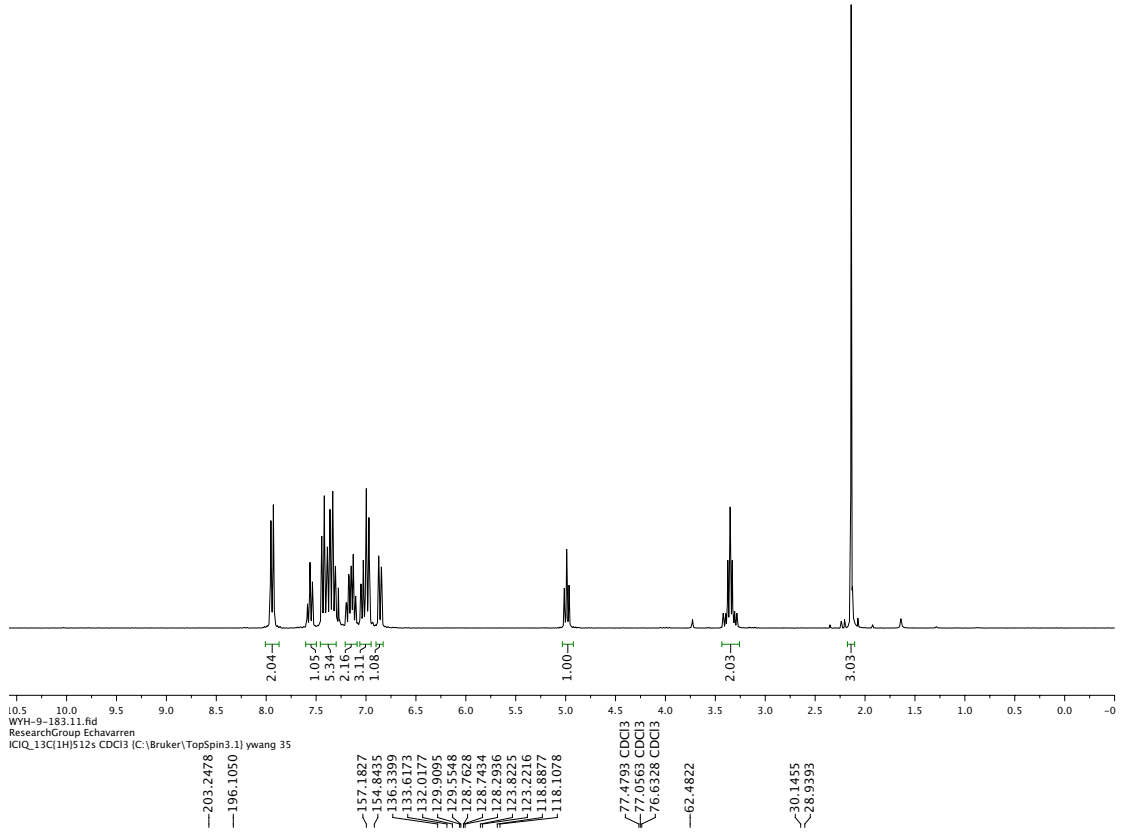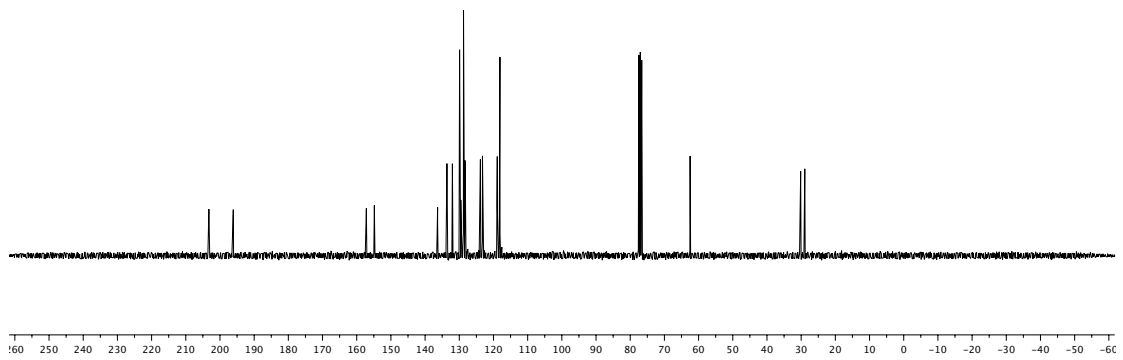

## Computational Supporting Information

### Table of Contents

|                                                                                                                                  |     |
|----------------------------------------------------------------------------------------------------------------------------------|-----|
| 1. Computational Methods. ....                                                                                                   | 117 |
| 2. Free energy reaction profiles for the formation of IIIa-c, III'a-c and the <i>anti</i> -rotamers IIIaa-cc and III'aa-cc. .... | 119 |
| 3. Free energy reaction profiles for the isomerization via 1,4-H-shift. ....                                                     | 122 |
| 4. Energies (hartree) and coordinates (angstrom) of the structures presented .....                                               | 123 |

## 1.- Computational methods.

Calculations were performed using the M06<sup>1</sup> functional together with the standard 6-31G(d) basis set to describe the H, C and P atoms.<sup>2</sup> The large core scalar relativistic pseudopotentials by Dolg et al. were used for Gold coupled to a double-zeta quality basis set.<sup>3</sup> Full geometry optimizations were performed in solution, with the Polarizable Continuum Model (IEFPCM) method,<sup>4</sup> and using Gaussian 09<sup>5</sup> defaults for dichloroethane (DCE). Some test calculations presented in the text as notes, were performed instead with the B3LYP<sup>6</sup> functional. Unless otherwise stated, all the energies presented correspond to free energies in solution. The nature of the stationary points was characterized by a vibrational analysis performed within the harmonic approximation at 298 K and 1 atm. Transition states were identified by the presence of one imaginary frequency and minima by a full set of real frequencies.

---

<sup>1</sup> Zhao, Y.; Truhlar, D. G. *Theor. Chem. Acc.* **2008**, *120*, 215-241.

<sup>2</sup> Hehre, W. J.; Ditchfield, R.; Pople, J.A. *J. Chem. Phys.* **1972**, *56*, 2257.

<sup>3</sup> Kuelche, W.; Dolg, M.; Stoll, H.; Preuss, H. *Mol. Phys.* **1991**, *74*, 1245.

<sup>4</sup> Cossi, M.; Barone, V.; Mennucci B.; Tomasi, J. *Chem. Phys. Lett.* **1998**, *286*, 253. Miertus, S.; Tomasi, J. *Chem. Phys.* **1982**, *65*, 239. Mennucci, B.; Tomasi, J. *J. Chem. Phys.* **1997**, *106*, 5151.

<sup>5</sup> Gaussian 09, Revision B.1, Frisch, M. J., Trucks, G. W., Schlegel, H. B., Scuseria, G. E., Robb, M. A., Cheeseman, J. R., Scalmani, G., Barone, V., Mennucci, B., Petersson, G. A., Nakatsuji, H., Caricato, M., Li, X., Hratchian, H. P., Izmaylov, A. F., Bloino, J., Zheng, G., Sonnenberg, J. L., Hada, M., Ehara, M., Toyota, K., Fukuda, R., Hasegawa, J., Ishida, M., Nakajima, T., Honda, Y., Kitao, O., Nakai, H., Vreven, T., Montgomery, J. A., Peralta, Jr., J. E., Ogliaro, F., Bearpark, M., Heyd, J. J., Brothers, E., Kudin, K. N., Staroverov, V. N., Kobayashi, R., Normand, J., Raghavachari, K., Rendell, A., Burant, J. C., Iyengar, S. S., Tomasi, J., Cossi, M., Rega, N., Millam, J. M., Klene, M., Knox, J. E., Cross, J. B., Bakken, V., Adamo, C., Jaramillo, J., Gomperts, R., Stratmann, R. E., Yazyev, O., Austin, A. J., Cammi, R., Pomelli, C., Ochterski, J. W., Martin, R. L., Morokuma, K., Zakrzewski, V. G., Voth, G. A., Salvador, P., Dannenberg, J. J., Dapprich, S., Daniels, A. D., Farkas, Ö., Foresman, J. B., Ortiz, J. V., Cioslowski, J.; Fox, D. J. Gaussian, Inc., Wallingford CT, 2009.

<sup>6</sup> Lee, C.; Yang W.; Par, R.G. *Phys. Rev. B* **1988**, *37*, 785-789. Becke, A. D. *J. Chem. Phys.* **1993**, *98*, 5648-5652.

2.- Free energy reaction profiles for the formation of IIIa-c, III'a-c and the anti-rotamers IIIaa-cc and III'aa-cc.

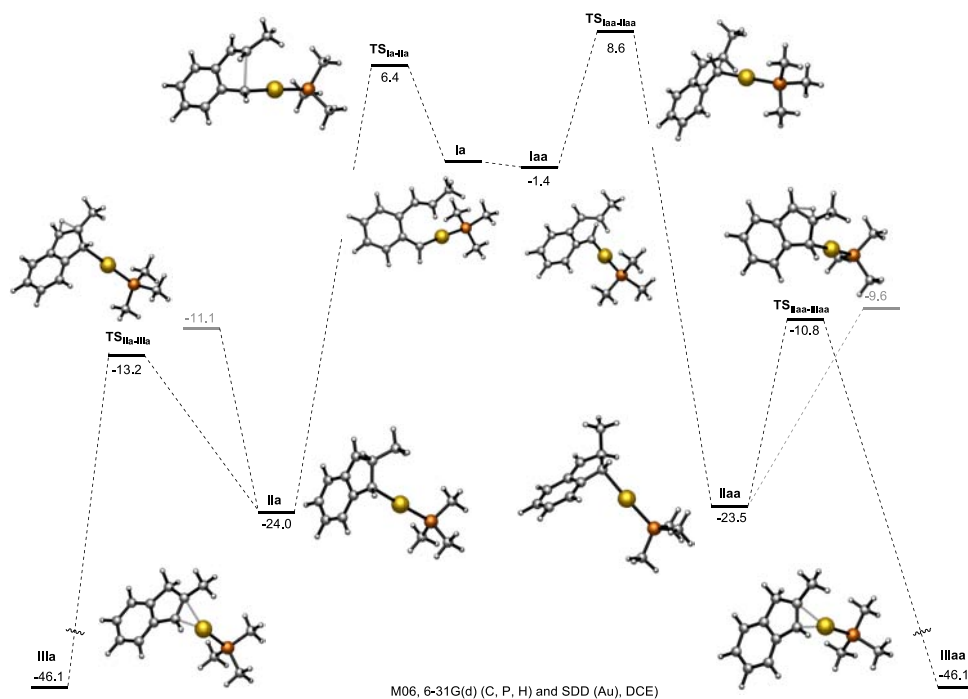

Free energy reaction profile for the formation of IIIa and the *anti*-rotamer IIIaa, energies correspond to free energies in solution, in kcal/mol. Energies in grey correspond to the transition states for the metal-migration competitive process.

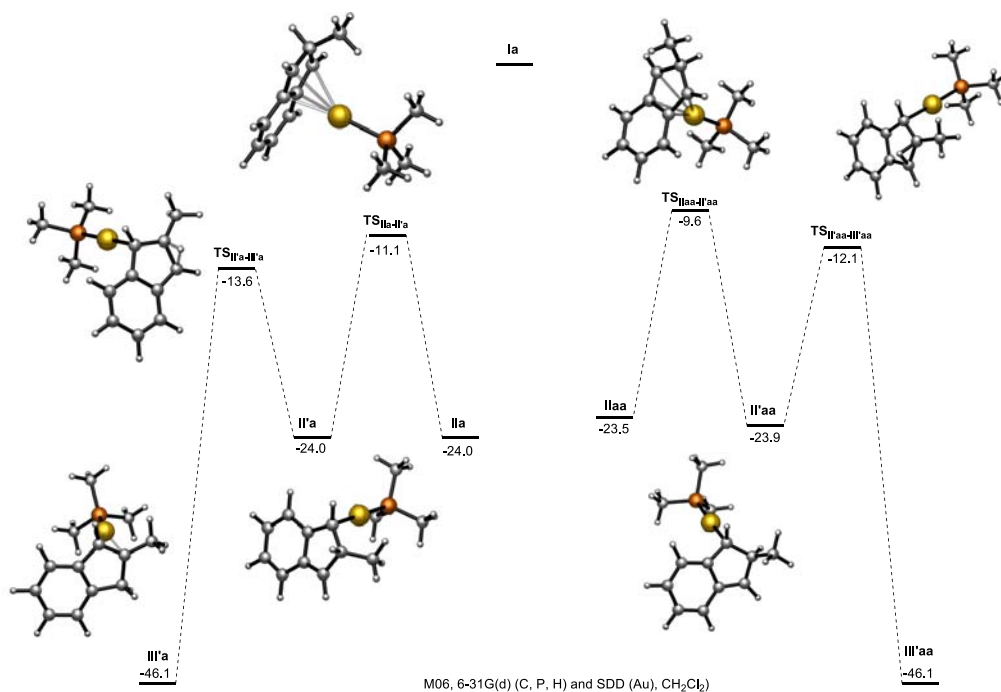

Free energy reaction profile for the formation of III'a and the *anti*-rotamer III'aa, through the metal-migration mechanism, energies correspond to free energies in solution, in kcal/mol.

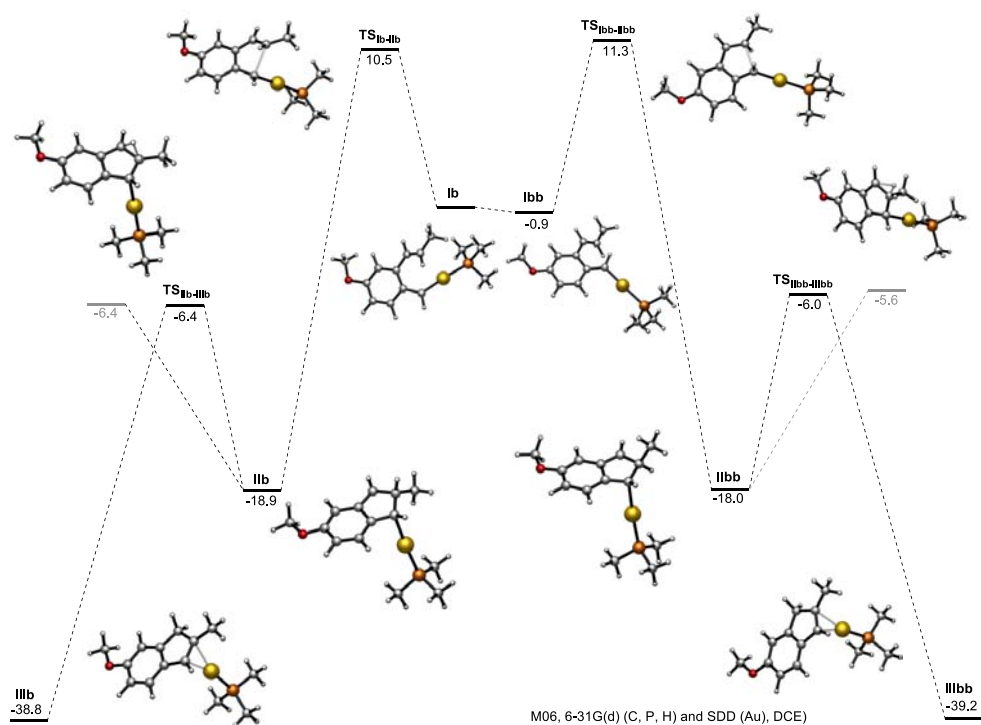

Free energy reaction profile for the formation of IIIb and the *anti*-rotamer IIIbb, energies correspond to free energies in solution, in kcal/mol. Energies in grey correspond to the transition states for the metal-migration competitive process.

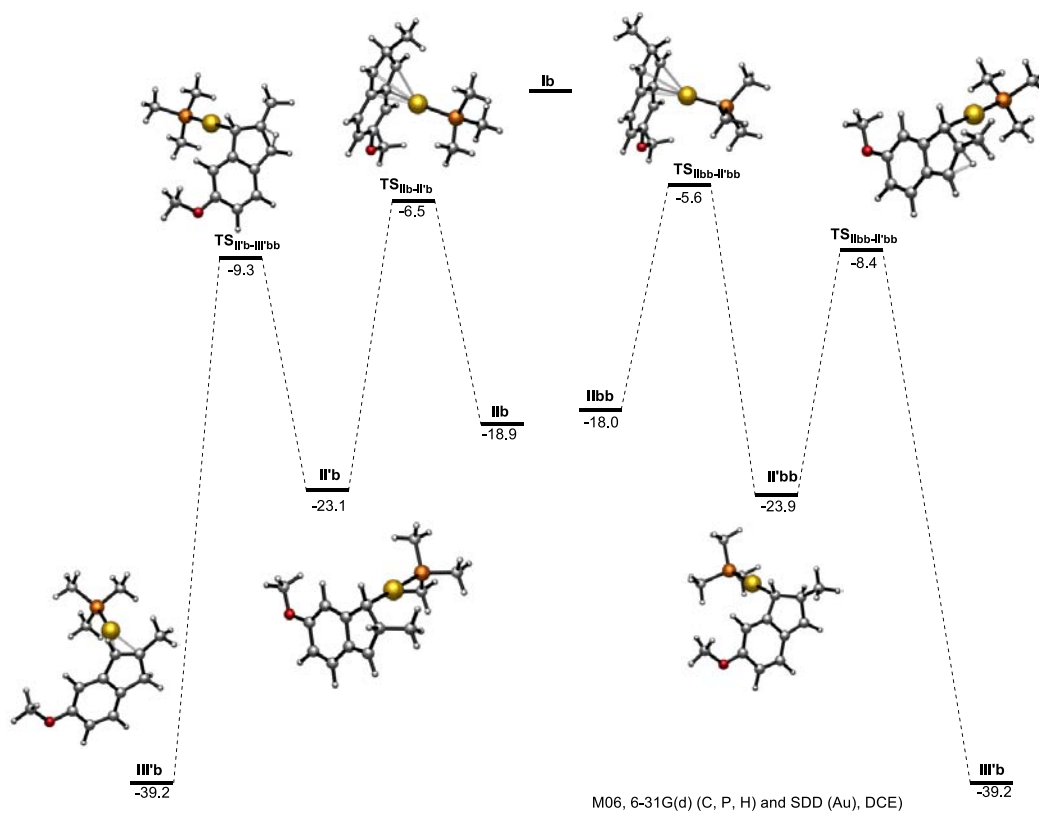

Free energy reaction profile for the formation of III'b and the *anti*-rotamer III'bb, through the metal-migration mechanism, energies correspond to free energies in solution, in kcal/mol.



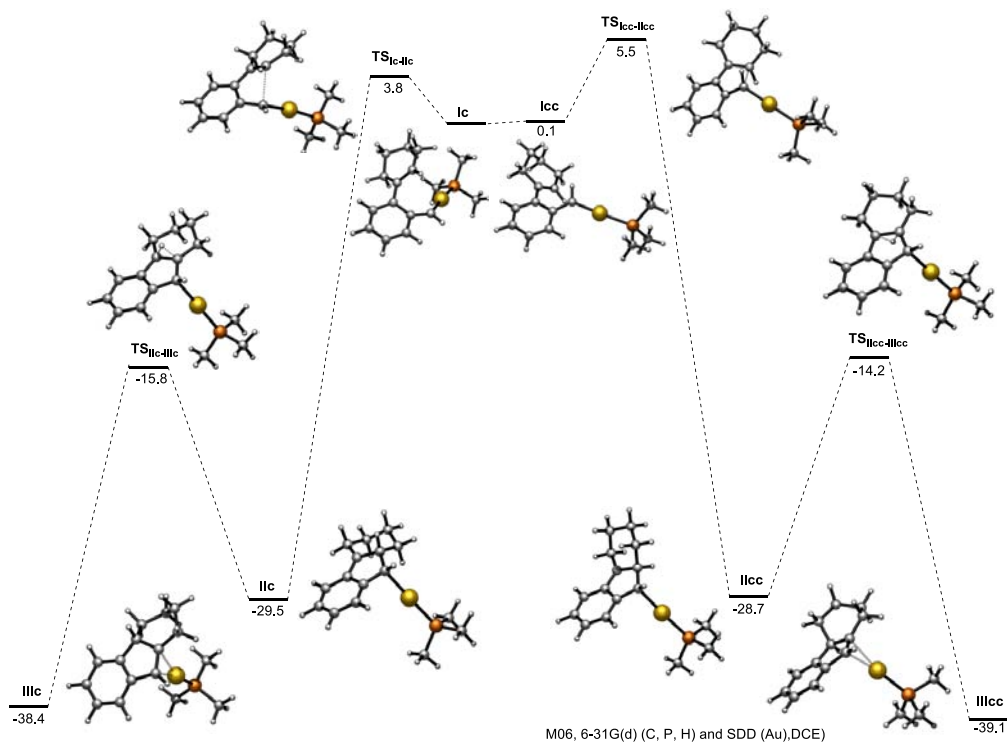

Free energy reaction profile for the formation of IIIc and the *anti*-rotamer IIIcc, energies correspond to free energies in solution, in kcal/mol.

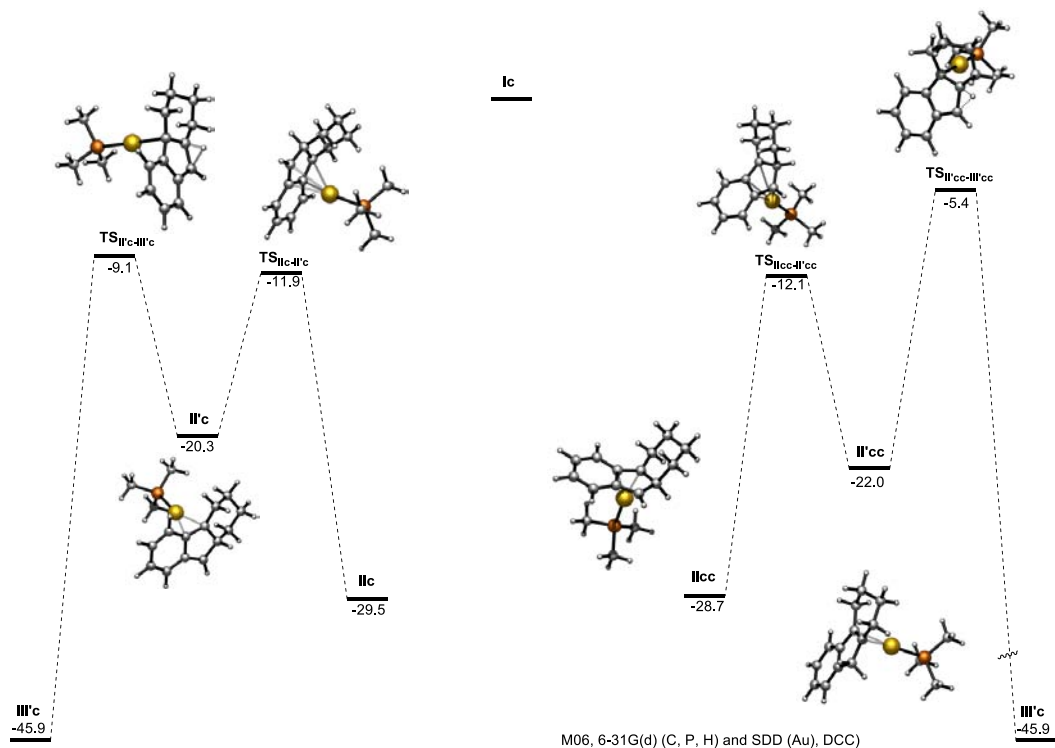

Free energy reaction profile for the formation of III'c and the *anti*-rotamer III'cc, through the metal-migration mechanism, energies correspond to free energies in solution, in kcal/mol.

### 3. Free energy reaction profiles for the isomerization via 1,4-H-shift.

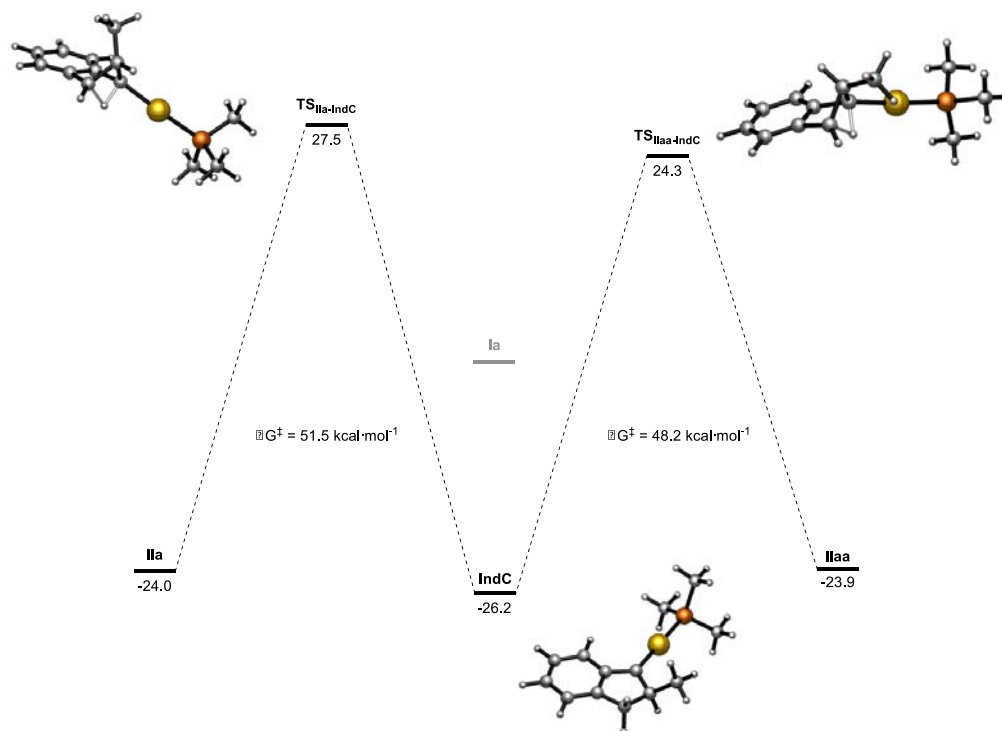

Free energy reaction profile for the isomerization via 1,4-H-shift, energies correspond to free energies in solution, in kcal/mol.

#### 4.- Energies (hartree) and coordinates (angstrom) of the structures presented.

Ia

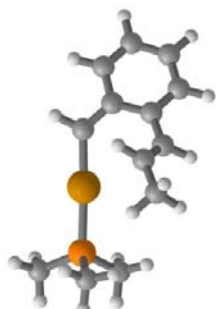

$\Delta E(\text{DCE})$  -983.050536 h.

$\Delta G(\text{DCE})$  -983.097758 h.

|    |           |           |           |
|----|-----------|-----------|-----------|
| 79 | -0.578043 | -0.487161 | -0.266964 |
| 15 | -2.807697 | -0.071098 | 0.426246  |
| 6  | -3.671985 | 1.269945  | -0.459703 |
| 1  | -3.661848 | 1.079482  | -1.538777 |
| 1  | -4.712589 | 1.332948  | -0.114565 |
| 1  | -3.175594 | 2.227876  | -0.265828 |
| 6  | -3.918955 | -1.506034 | 0.246863  |
| 1  | -3.536008 | -2.351058 | 0.829897  |
| 1  | -4.926019 | -1.248953 | 0.601414  |
| 1  | -3.972802 | -1.805242 | -0.805951 |
| 6  | -2.957908 | 0.399613  | 2.182017  |
| 1  | -2.397095 | 1.323183  | 2.368195  |
| 1  | -4.012815 | 0.561175  | 2.439473  |
| 1  | -2.548283 | -0.392258 | 2.819206  |
| 6  | 1.341091  | -1.015125 | -0.794699 |
| 1  | 1.450636  | -1.908355 | -1.424009 |
| 6  | 2.575846  | -0.512975 | -0.377030 |
| 6  | 3.699794  | -1.396246 | -0.473746 |
| 6  | 2.731522  | 0.721415  | 0.358672  |
| 6  | 4.844186  | -1.174601 | 0.253457  |
| 1  | 3.600842  | -2.290549 | -1.087556 |
| 6  | 3.892085  | 0.892432  | 1.122505  |
| 6  | 4.923938  | -0.033196 | 1.071707  |
| 1  | 5.676536  | -1.872506 | 0.205693  |
| 1  | 4.002614  | 1.796463  | 1.719538  |
| 1  | 5.826631  | 0.146411  | 1.653178  |
| 6  | 1.770033  | 1.793986  | 0.294373  |
| 6  | 1.022687  | 2.088034  | -0.793863 |
| 6  | 0.057632  | 3.213376  | -0.868677 |
| 1  | 1.184892  | 1.520562  | -1.713574 |
| 1  | -0.898036 | 2.874538  | -1.291442 |
| 1  | 0.428580  | 3.995280  | -1.547099 |
| 1  | 1.718665  | 2.456307  | 1.163173  |
| 1  | -0.127252 | 3.663139  | 0.114239  |

TSIa-IIa

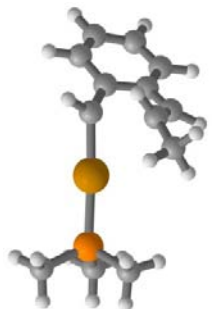

$\Delta E(\text{DCE})$  -983.039943 h.

$\Delta G(\text{DCE})$  -983.087485 h.

|    |           |           |           |
|----|-----------|-----------|-----------|
| 79 | -0.600288 | -0.153969 | -0.381283 |
| 15 | -2.789375 | -0.381395 | 0.447243  |
| 6  | -3.547897 | 1.220670  | 0.876939  |
| 1  | -3.561086 | 1.873220  | -0.003810 |

|   |           |           |           |
|---|-----------|-----------|-----------|
| 1 | -4.576535 | 1.071029  | 1.230484  |
| 1 | -2.962705 | 1.709508  | 1.664570  |
| 6 | -3.958393 | -1.136121 | -0.729556 |
| 1 | -3.628582 | -2.149292 | -0.985122 |
| 1 | -4.961599 | -1.183848 | -0.285857 |
| 1 | -3.997640 | -0.538992 | -1.647576 |
| 6 | -2.952246 | -1.382813 | 1.960719  |
| 1 | -2.345165 | -0.948082 | 2.762585  |
| 1 | -4.002549 | -1.412728 | 2.279276  |
| 1 | -2.603527 | -2.404256 | 1.771870  |
| 6 | 1.322793  | -0.014768 | -1.181564 |
| 1 | 1.378243  | -0.099539 | -2.277156 |
| 6 | 2.545904  | -0.269309 | -0.512283 |
| 6 | 3.459727  | -1.270197 | -0.927804 |
| 6 | 2.835908  | 0.491152  | 0.660991  |
| 6 | 4.489416  | -1.625161 | -0.085001 |
| 1 | 3.291650  | -1.801445 | -1.863475 |
| 6 | 3.885529  | 0.098759  | 1.516540  |
| 6 | 4.693152  | -0.952902 | 1.143936  |
| 1 | 5.157163  | -2.438252 | -0.363487 |
| 1 | 4.077872  | 0.658834  | 2.430433  |
| 1 | 5.525133  | -1.249634 | 1.779601  |
| 6 | 2.040836  | 1.654296  | 0.778062  |
| 6 | 1.369307  | 2.122821  | -0.334227 |
| 6 | 0.272393  | 3.133130  | -0.280433 |
| 1 | 1.858508  | 2.015477  | -1.310085 |
| 1 | -0.457387 | 2.970840  | -1.082421 |
| 1 | 0.688911  | 4.139845  | -0.431924 |
| 1 | 1.899420  | 2.139940  | 1.746516  |
| 1 | -0.255353 | 3.114508  | 0.680352  |

IIa=II'a

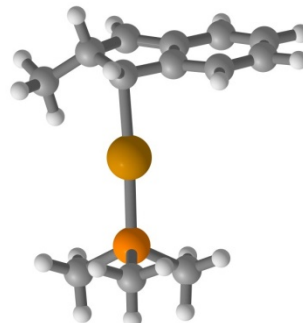

$\Delta E(\text{DCE})$  -983.087670 h.

$\Delta G(\text{DCE})$  -983.135936 h.

|    |           |           |           |
|----|-----------|-----------|-----------|
| 79 | 0.526829  | 0.201924  | -0.326001 |
| 15 | 2.663970  | -0.488230 | 0.345648  |
| 6  | 3.579049  | 0.788193  | 1.268875  |
| 1  | 3.012838  | 1.080635  | 2.160272  |
| 1  | 4.559246  | 0.399148  | 1.574773  |
| 1  | 3.722457  | 1.672980  | 0.638609  |
| 6  | 2.664939  | -1.939030 | 1.448866  |
| 1  | 2.191509  | -2.790126 | 0.946925  |
| 1  | 3.696626  | -2.204327 | 1.715933  |
| 1  | 2.102408  | -1.711423 | 2.361267  |
| 6  | 3.775134  | -0.948550 | -1.022083 |
| 1  | 3.910948  | -0.095173 | -1.695669 |
| 1  | 4.751198  | -1.252280 | -0.621078 |
| 1  | 3.344195  | -1.780170 | -1.590404 |
| 6  | -2.789574 | 1.450244  | 0.894343  |
| 1  | -3.218661 | 1.983879  | 1.741289  |
| 6  | -2.928162 | 0.114272  | 0.637250  |
| 6  | -3.681181 | -0.902331 | 1.309867  |
| 6  | -2.182745 | -0.193986 | -0.574360 |
| 6  | -3.740280 | -2.141177 | 0.749077  |
| 1  | -4.201669 | -0.668976 | 2.237087  |
| 6  | -2.307105 | -1.490048 | -1.144910 |
| 6  | -3.066159 | -2.420758 | -0.489199 |
| 1  | -4.310803 | -2.936238 | 1.224101  |

|   |           |           |           |
|---|-----------|-----------|-----------|
| 1 | -1.792230 | -1.731624 | -2.073816 |
| 1 | -3.167825 | -3.418193 | -0.914735 |
| 6 | -1.447861 | 0.947322  | -0.990419 |
| 6 | -1.954164 | 2.104524  | -0.140799 |
| 1 | -1.251566 | 1.107075  | -2.055680 |
| 1 | -2.668277 | 2.656767  | -0.787342 |
| 6 | -0.950606 | 3.119134  | 0.402087  |
| 1 | -0.355737 | 3.544284  | -0.414397 |
| 1 | -1.469247 | 3.939608  | 0.913374  |
| 1 | -0.262191 | 2.648762  | 1.117289  |

**TSIIa-IIIa = TSII'a-III'a**

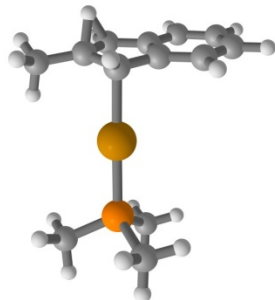

$\Delta E(\text{DCE})$  -983.071726 h.

$\Delta G(\text{DCE})$  -983.119500 h.

|    |           |           |           |
|----|-----------|-----------|-----------|
| 79 | 0.588890  | 0.208686  | -0.279760 |
| 15 | 2.725597  | -0.527971 | 0.328100  |
| 6  | 3.873312  | 0.807864  | 0.793216  |
| 1  | 3.476558  | 1.358952  | 1.653111  |
| 1  | 4.850990  | 0.382668  | 1.056072  |
| 1  | 3.995780  | 1.503516  | -0.044300 |
| 6  | 2.745617  | -1.664357 | 1.752802  |
| 1  | 2.164516  | -2.563234 | 1.518621  |
| 1  | 3.779225  | -1.951997 | 1.986947  |
| 1  | 2.300244  | -1.175851 | 2.626610  |
| 6  | 3.593789  | -1.436245 | -0.991410 |
| 1  | 3.705971  | -0.795820 | -1.873344 |
| 1  | 4.586933  | -1.746438 | -0.640348 |
| 1  | 3.017403  | -2.324367 | -1.273585 |
| 6  | -2.702604 | 1.465185  | 0.944931  |
| 1  | -3.074645 | 2.045244  | 1.787530  |
| 6  | -3.015105 | 0.114935  | 0.624831  |
| 6  | -3.916181 | -0.785521 | 1.223714  |
| 6  | -2.265365 | -0.239799 | -0.531747 |
| 6  | -4.065702 | -2.032139 | 0.653750  |
| 1  | -4.475656 | -0.499665 | 2.113235  |
| 6  | -2.462373 | -1.503156 | -1.115132 |
| 6  | -3.349212 | -2.378004 | -0.515549 |
| 1  | -4.748601 | -2.755865 | 1.094168  |
| 1  | -1.913170 | -1.788379 | -2.012066 |
| 1  | -3.502667 | -3.363667 | -0.952995 |
| 6  | -1.407691 | 0.870228  | -0.916451 |
| 6  | -1.772514 | 1.979288  | -0.027327 |
| 1  | -1.215130 | 1.075746  | -1.974737 |
| 1  | -2.978222 | 2.218986  | -0.225518 |
| 6  | -1.054167 | 3.290794  | 0.095585  |
| 1  | -0.704641 | 3.635376  | -0.884008 |
| 1  | -1.701584 | 4.062684  | 0.527439  |
| 1  | -0.180413 | 3.181088  | 0.749435  |

**IIIa = III'a = IIIaa = III'aa**

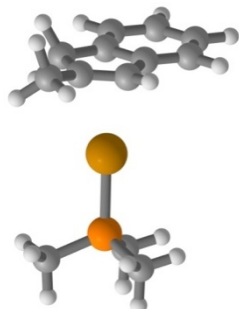

$\Delta E(\text{DCE})$  -983.123010 h.

$\Delta G(\text{DCE})$  -983.171280 h.

|    |           |           |           |
|----|-----------|-----------|-----------|
| 79 | 0.573360  | 0.317458  | -0.206964 |
| 15 | 2.614702  | -0.729412 | 0.222046  |
| 6  | 3.606536  | 0.105701  | 1.498690  |
| 1  | 3.055613  | 0.124502  | 2.445392  |
| 1  | 4.553596  | -0.431068 | 1.642140  |
| 1  | 3.818022  | 1.136255  | 1.192906  |
| 6  | 2.435733  | -2.445101 | 0.801290  |
| 1  | 1.919379  | -3.042388 | 0.041806  |
| 1  | 3.426438  | -2.878665 | 0.990978  |
| 1  | 1.848362  | -2.467075 | 1.725769  |
| 6  | 3.698811  | -0.826004 | -1.235939 |
| 1  | 3.939498  | 0.182848  | -1.588683 |
| 1  | 4.628038  | -1.348086 | -0.972583 |
| 1  | 3.195266  | -1.370709 | -2.042032 |
| 6  | -2.125194 | 1.347766  | 1.214437  |
| 1  | -1.508256 | 1.213294  | 2.115976  |
| 6  | -2.763592 | 0.082518  | 0.719357  |
| 6  | -3.600661 | -0.816369 | 1.363812  |
| 6  | -2.396843 | -0.126211 | -0.622817 |
| 6  | -4.077531 | -1.918581 | 0.649031  |
| 1  | -3.890126 | -0.664550 | 2.403302  |
| 6  | -2.868099 | -1.224199 | -1.336547 |
| 6  | -3.718379 | -2.118409 | -0.686589 |
| 1  | -4.742642 | -2.628929 | 1.137495  |
| 1  | -2.581592 | -1.380632 | -2.375927 |
| 1  | -4.105695 | -2.982382 | -1.224127 |
| 6  | -1.497120 | 0.962451  | -1.028440 |
| 6  | -1.327175 | 1.838732  | 0.031272  |
| 1  | -1.219992 | 1.183325  | -2.060583 |
| 1  | -2.873131 | 2.114052  | 1.477063  |
| 6  | -0.732952 | 3.203121  | -0.009240 |
| 1  | -0.144809 | 3.365786  | -0.919543 |
| 1  | -1.539497 | 3.950956  | 0.016256  |
| 1  | -0.095617 | 3.392979  | 0.863988  |

**TSIIa-II'a**

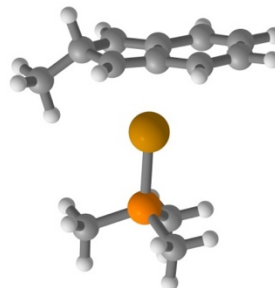

$\Delta E(\text{DCE})$  -983.068742 h.

$\Delta G(\text{DCE})$  -983.115452 h.

|    |           |           |           |
|----|-----------|-----------|-----------|
| 79 | 0.241519  | -0.052303 | -0.001364 |
| 15 | 2.537885  | -0.250075 | -0.000760 |
| 6  | 3.352674  | 1.371537  | -0.113203 |
| 1  | 3.057358  | 1.992869  | 0.739958  |
| 1  | 4.442967  | 1.241991  | -0.107808 |
| 1  | 3.051523  | 1.876758  | -1.037793 |
| 6  | 3.208581  | -1.027749 | 1.499564  |
| 1  | 2.810993  | -2.043170 | 1.602914  |
| 1  | 4.303549  | -1.071790 | 1.431625  |
| 1  | 2.922812  | -0.444376 | 2.381633  |
| 6  | 3.194068  | -1.230487 | -1.383629 |
| 1  | 2.907290  | -0.772204 | -2.336177 |
| 1  | 4.288969  | -1.275739 | -1.315711 |
| 1  | 2.788204  | -2.247247 | -1.344407 |
| 6  | -1.984282 | 1.339622  | 1.181311  |
| 1  | -1.957599 | 1.676868  | 2.214275  |
| 6  | -2.169580 | 0.049950  | 0.746097  |
| 6  | -2.409727 | -1.191036 | 1.447683  |
| 6  | -2.172078 | 0.050217  | -0.743208 |
| 6  | -2.641817 | -2.316809 | 0.727168  |
| 1  | -2.414230 | -1.200109 | 2.536388  |
| 6  | -2.414477 | -1.190526 | -1.444409 |
| 6  | -2.644305 | -2.316532 | -0.723540 |

|   |           |           |           |
|---|-----------|-----------|-----------|
| 1 | -2.835768 | -3.256977 | 1.240580  |
| 1 | -2.422661 | -1.199222 | -2.533097 |
| 1 | -2.840062 | -3.256468 | -1.236691 |
| 6 | -1.988473 | 1.340027  | -1.178669 |
| 6 | -1.939311 | 2.254245  | 0.001384  |
| 1 | -1.965159 | 1.677477  | -2.211650 |
| 1 | -2.921085 | 2.777048  | 0.003447  |
| 6 | -0.839996 | 3.312940  | -0.000656 |
| 1 | -0.915473 | 3.951072  | -0.888853 |
| 1 | -0.909640 | 3.948558  | 0.889835  |
| 1 | 0.152053  | 2.835302  | -0.004645 |

Iaa

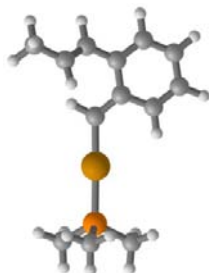

$\Delta E(\text{DCE})$  -983.050303 h.

$\Delta G(\text{DCE})$  -983.100068 h.

|    |           |           |           |
|----|-----------|-----------|-----------|
| 79 | -0.862905 | 0.143417  | -0.146163 |
| 15 | -3.220099 | -0.008773 | 0.114311  |
| 6  | -3.835117 | 0.648448  | 1.701012  |
| 1  | -3.578849 | 1.710020  | 1.789571  |
| 1  | -4.925701 | 0.534056  | 1.757046  |
| 1  | -3.373331 | 0.106175  | 2.533774  |
| 6  | -4.181636 | 0.890518  | -1.147685 |
| 1  | -3.949563 | 0.495396  | -2.143091 |
| 1  | -5.256327 | 0.773089  | -0.955855 |
| 1  | -3.925483 | 1.955709  | -1.125639 |
| 6  | -3.881583 | -1.707365 | 0.051399  |
| 1  | -3.426649 | -2.314614 | 0.841940  |
| 1  | -4.970555 | -1.690047 | 0.190824  |
| 1  | -3.650295 | -2.163349 | -0.917798 |
| 6  | 1.168130  | 0.322565  | -0.376258 |
| 1  | 1.541437  | 1.214437  | -0.892893 |
| 6  | 2.173482  | -0.578091 | -0.019018 |
| 6  | 1.800367  | -1.922486 | 0.297237  |
| 6  | 3.578015  | -0.263347 | -0.151086 |
| 6  | 2.732816  | -2.929736 | 0.334241  |
| 1  | 0.741177  | -2.132413 | 0.444673  |
| 6  | 4.496002  | -1.320052 | -0.157596 |
| 6  | 4.082543  | -2.622578 | 0.081742  |
| 1  | 2.436489  | -3.954921 | 0.542206  |
| 1  | 5.553603  | -1.103856 | -0.301509 |
| 1  | 4.824192  | -3.419381 | 0.101330  |
| 6  | 4.067693  | 1.094709  | -0.222182 |
| 6  | 3.497623  | 2.152935  | 0.392187  |
| 6  | 4.024436  | 3.538246  | 0.333120  |
| 1  | 2.620479  | 1.990431  | 1.024977  |
| 1  | 4.264742  | 3.907313  | 1.339827  |
| 1  | 3.265681  | 4.223680  | -0.070426 |
| 1  | 4.921731  | 3.607773  | -0.292340 |
| 1  | 5.021541  | 1.239589  | -0.737103 |

TSIaa-IIaa

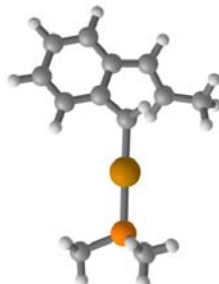

$\Delta E(\text{DCE})$  -983.037932 h.

$\Delta G(\text{DCE})$  -983.086327 h.

|    |           |           |           |
|----|-----------|-----------|-----------|
| 79 | -0.733147 | 0.063184  | -0.197407 |
| 15 | -3.042587 | -0.303964 | 0.198251  |
| 6  | -3.719517 | 0.583020  | 1.641658  |
| 1  | -3.583701 | 1.662738  | 1.512335  |
| 1  | -4.790282 | 0.364769  | 1.749335  |
| 1  | -3.195354 | 0.270594  | 2.551793  |
| 6  | -4.123394 | 0.203022  | -1.181156 |
| 1  | -3.854236 | -0.349897 | -2.088204 |
| 1  | -5.173048 | -0.001976 | -0.932335 |
| 1  | -4.001634 | 1.274462  | -1.375941 |
| 6  | -3.490301 | -2.047009 | 0.495244  |
| 1  | -2.967260 | -2.420703 | 1.382801  |
| 1  | -4.573540 | -2.136424 | 0.650463  |
| 1  | -3.199184 | -2.658791 | -0.366070 |
| 6  | 1.271519  | 0.398199  | -0.588880 |
| 1  | 1.487521  | 1.044762  | -1.445725 |
| 6  | 2.369809  | -0.441418 | -0.200093 |
| 6  | 2.306582  | -1.844484 | -0.091459 |
| 6  | 3.604250  | 0.218999  | 0.073283  |
| 6  | 3.476537  | -2.552334 | 0.105094  |
| 1  | 1.356259  | -2.356543 | -0.236409 |
| 6  | 4.791617  | -0.518271 | 0.249653  |
| 6  | 4.716870  | -1.894460 | 0.263109  |
| 1  | 3.447745  | -3.640094 | 0.127578  |
| 1  | 5.735782  | -0.002504 | 0.416661  |
| 1  | 5.615747  | -2.485730 | 0.425169  |
| 6  | 3.432586  | 1.619342  | 0.187946  |
| 6  | 2.146414  | 2.082430  | 0.410170  |
| 1  | 1.532753  | 1.526542  | 1.128163  |
| 1  | 4.257601  | 2.312950  | 0.009252  |
| 6  | 1.686367  | 3.470434  | 0.125521  |
| 1  | 1.631748  | 4.061291  | 1.049885  |
| 1  | 2.343167  | 3.985885  | -0.583590 |
| 1  | 0.671290  | 3.451782  | -0.294300 |

IIaa=II'aa

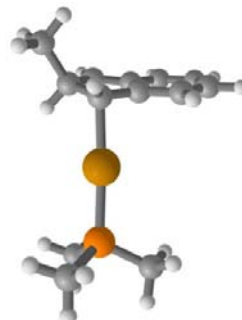

$\Delta E(\text{DCE})$  -983.087330 h.

$\Delta G(\text{DCE})$  -983.135908 h.

|    |           |           |           |
|----|-----------|-----------|-----------|
| 79 | -0.601191 | -0.255352 | -0.223005 |
| 15 | -2.812661 | 0.358426  | 0.265299  |
| 6  | -4.042109 | -0.485026 | -0.782454 |
| 1  | -3.961542 | -1.569889 | -0.651545 |
| 1  | -5.054579 | -0.161635 | -0.507065 |
| 1  | -3.861166 | -0.245639 | -1.836257 |
| 6  | -3.326257 | -0.022963 | 1.970820  |
| 1  | -2.692140 | 0.518896  | 2.681111  |
| 1  | -4.373086 | 0.271067  | 2.123302  |
| 1  | -3.223065 | -1.097858 | 2.157372  |
| 6  | -3.175120 | 2.132269  | 0.057326  |
| 1  | -2.969387 | 2.435379  | -0.975341 |
| 1  | -4.230924 | 2.327537  | 0.287795  |
| 1  | -2.543875 | 2.724685  | 0.728846  |
| 6  | 2.779829  | -1.115734 | 1.218664  |
| 1  | 3.236842  | -1.500509 | 2.129080  |
| 6  | 2.895396  | 0.162997  | 0.747200  |
| 6  | 3.649116  | 1.280492  | 1.233508  |
| 6  | 2.133924  | 0.263363  | -0.488346 |
| 6  | 3.687775  | 2.411488  | 0.476819  |
| 1  | 4.184883  | 1.205317  | 2.178099  |
| 6  | 2.222177  | 1.455900  | -1.255624 |
| 6  | 2.985501  | 2.485078  | -0.774655 |

|   |          |           |           |
|---|----------|-----------|-----------|
| 1 | 4.260831 | 3.276125  | 0.804593  |
| 1 | 1.684489 | 1.541354  | -2.198916 |
| 1 | 3.065748 | 3.403287  | -1.354715 |
| 6 | 1.426030 | -0.946169 | -0.715697 |
| 6 | 1.923391 | -1.933772 | 0.329307  |
| 1 | 1.104035 | -2.366815 | 0.934284  |
| 1 | 1.270930 | -1.293547 | -1.742928 |
| 6 | 2.695462 | -3.103433 | -0.303878 |
| 1 | 2.028173 | -3.684563 | -0.950757 |
| 1 | 3.526211 | -2.723229 | -0.912500 |
| 1 | 3.100941 | -3.770466 | 0.465521  |

**TSIIaa-IIIaa = TSII'aa-III'aa**

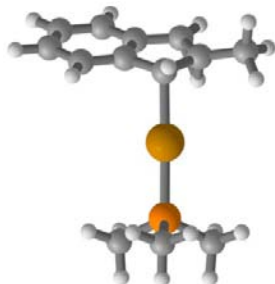

$\Delta E(\text{DCE})$  -983.069878 h.

$\Delta G(\text{DCE})$  -983.117221 h.

|    |           |           |           |
|----|-----------|-----------|-----------|
| 79 | -0.609529 | 0.217243  | -0.261134 |
| 15 | -2.765438 | -0.500937 | 0.314475  |
| 6  | -2.817540 | -2.153406 | 1.080599  |
| 1  | -2.216626 | -2.160056 | 1.996667  |
| 1  | -3.854698 | -2.417601 | 1.326174  |
| 1  | -2.409631 | -2.897988 | 0.388091  |
| 6  | -3.621930 | 0.581135  | 1.504720  |
| 1  | -3.724005 | 1.588684  | 1.086438  |
| 1  | -4.619743 | 0.178129  | 1.723424  |
| 1  | -3.046368 | 0.642928  | 2.435120  |
| 6  | -3.909252 | -0.617158 | -1.099483 |
| 1  | -3.514517 | -1.318005 | -1.843543 |
| 1  | -4.891060 | -0.969657 | -0.756454 |
| 1  | -4.023177 | 0.366473  | -1.568859 |
| 6  | 1.406615  | 0.861774  | -0.839604 |
| 1  | 1.196436  | 1.144658  | -1.876366 |
| 6  | 2.287613  | -0.252746 | -0.528048 |
| 6  | 2.422142  | -1.520757 | -1.119408 |
| 6  | 3.075604  | 0.070977  | 0.611027  |
| 6  | 3.324865  | -2.413990 | -0.573671 |
| 1  | 1.826684  | -1.788400 | -1.992027 |
| 6  | 3.960489  | -0.862534 | 1.180995  |
| 6  | 4.086502  | -2.094972 | 0.573845  |
| 1  | 3.451788  | -3.393289 | -1.033296 |
| 1  | 4.543570  | -0.605876 | 2.064261  |
| 1  | 4.779065  | -2.831854 | 0.976053  |
| 6  | 2.794071  | 1.422831  | 0.969123  |
| 6  | 1.784525  | 1.936343  | 0.083483  |
| 1  | 1.429571  | 1.549659  | 1.235533  |
| 1  | 3.252669  | 2.006333  | 1.765298  |
| 6  | 1.436722  | 3.377455  | -0.098986 |
| 1  | 1.598029  | 3.957352  | 0.815997  |
| 1  | 2.079631  | 3.798577  | -0.882386 |
| 1  | 0.394149  | 3.492065  | -0.415227 |

**TSIIaa-II'aa**

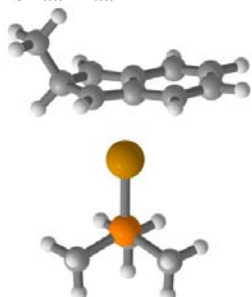

$\Delta E(\text{DCE})$  -983.066050 h.

$\Delta G(\text{DCE})$  -983.113129 h.

|    |           |           |           |
|----|-----------|-----------|-----------|
| 79 | -0.356515 | -0.047802 | 0.005223  |
| 15 | -2.659829 | -0.101328 | 0.000090  |
| 6  | -3.338648 | -1.618741 | -0.736294 |
| 1  | -3.000571 | -2.493714 | -0.170517 |
| 1  | -4.435473 | -1.574772 | -0.713803 |
| 1  | -3.000446 | -1.714232 | -1.773631 |
| 6  | -3.399920 | 0.000865  | 1.657330  |
| 1  | -3.100544 | 0.935668  | 2.143324  |
| 1  | -4.494468 | -0.030989 | 1.574827  |
| 1  | -3.059704 | -0.840953 | 2.270047  |
| 6  | -3.395251 | 1.264710  | -0.947716 |
| 1  | -3.055171 | 1.221099  | -1.988185 |
| 1  | -4.489984 | 1.182981  | -0.920919 |
| 1  | -3.092229 | 2.224924  | -0.516445 |
| 6  | 2.077705  | -1.049768 | 1.177736  |
| 1  | 2.125928  | -1.383815 | 2.210990  |
| 6  | 2.049914  | 0.251562  | 0.743540  |
| 6  | 2.104460  | 1.515243  | 1.444875  |
| 6  | 2.047135  | 0.251686  | -0.747120 |
| 6  | 2.166992  | 2.662188  | 0.723928  |
| 1  | 2.112077  | 1.524826  | 2.533592  |
| 6  | 2.097853  | 1.515668  | -1.448178 |
| 6  | 2.163393  | 2.662409  | -0.727135 |
| 1  | 2.225994  | 3.620560  | 1.236864  |
| 1  | 2.100412  | 1.525766  | -2.536913 |
| 1  | 2.219434  | 3.620963  | -1.240044 |
| 6  | 2.073261  | -1.049469 | -1.181694 |
| 6  | 2.171916  | -1.964208 | -0.002298 |
| 1  | 1.363249  | -2.714853 | -0.000649 |
| 1  | 2.117294  | -1.383200 | -2.215238 |
| 6  | 3.513264  | -2.723795 | -0.005195 |
| 1  | 3.588870  | -3.358605 | -0.895429 |
| 1  | 4.352367  | -2.016143 | -0.006734 |
| 1  | 3.592616  | -3.359329 | 0.884180  |

**IndC**

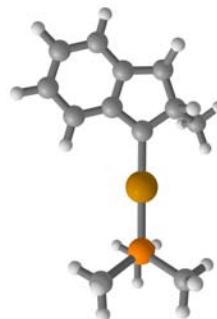

$\Delta E(\text{DCE})$  -983.091201 h.

$\Delta G(\text{DCE})$  -983.139522 h.

|    |           |           |           |
|----|-----------|-----------|-----------|
| 6  | 1.309736  | 0.529667  | -0.111323 |
| 6  | 2.372342  | -0.393517 | -0.017131 |
| 6  | 2.302382  | -1.799717 | 0.122129  |
| 6  | 3.626668  | 0.271929  | -0.088083 |
| 6  | 3.479180  | -2.515770 | 0.172306  |
| 1  | 1.331803  | -2.291110 | 0.183435  |
| 6  | 4.804861  | -0.461008 | -0.042736 |
| 6  | 4.716172  | -1.845148 | 0.087599  |
| 1  | 3.463908  | -3.598223 | 0.275144  |
| 1  | 5.776052  | 0.026903  | -0.103048 |
| 1  | 5.632462  | -2.432423 | 0.126941  |
| 6  | 3.418735  | 1.741067  | -0.196659 |
| 6  | 1.890804  | 1.887680  | -0.324421 |
| 1  | 3.971635  | 2.181786  | -1.037221 |
| 1  | 1.633137  | 2.126926  | -1.375624 |
| 6  | 1.279773  | 2.974735  | 0.556725  |
| 1  | 1.744548  | 3.943515  | 0.337434  |
| 1  | 0.199510  | 3.062389  | 0.389058  |
| 1  | 1.446480  | 2.749923  | 1.618669  |
| 1  | 3.782996  | 2.250229  | 0.709503  |
| 79 | -0.703769 | 0.114634  | -0.039038 |
| 15 | -3.032720 | -0.359773 | 0.013251  |

|   |           |           |           |
|---|-----------|-----------|-----------|
| 6 | -3.769195 | -0.337154 | 1.681507  |
| 1 | -3.637223 | 0.652248  | 2.133585  |
| 1 | -4.841497 | -0.565523 | 1.620812  |
| 1 | -3.277741 | -1.081303 | 2.318100  |
| 6 | -3.478915 | -1.997996 | -0.652425 |
| 1 | -4.564460 | -2.148411 | -0.585189 |
| 1 | -3.170303 | -2.070207 | -1.701377 |
| 1 | -2.970145 | -2.784205 | -0.083363 |
| 6 | -4.058033 | 0.807387  | -0.942108 |
| 1 | -3.746758 | 0.806252  | -1.992785 |
| 1 | -5.115456 | 0.518235  | -0.878761 |
| 1 | -3.937488 | 1.820573  | -0.542356 |

**TSIIaa-IndC**

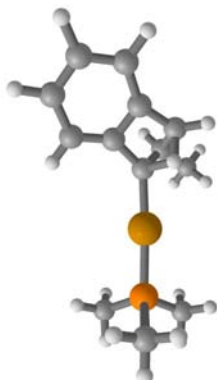

$\Delta E(\text{DCE})$  -983.011355 h.

$\Delta G(\text{DCE})$  -983.058992 h.

|    |           |           |           |
|----|-----------|-----------|-----------|
| 6  | -1.344707 | 0.536311  | -0.171118 |
| 6  | -2.495094 | -0.442523 | -0.225714 |
| 6  | -2.782087 | -1.678457 | -0.763499 |
| 6  | -3.424371 | 0.287290  | 0.518586  |
| 6  | -4.077118 | -2.163895 | -0.519573 |
| 1  | -2.055974 | -2.254847 | -1.334819 |
| 6  | -4.691122 | -0.186226 | 0.787959  |
| 6  | -5.001103 | -1.440802 | 0.237577  |
| 1  | -4.366352 | -3.134222 | -0.919529 |
| 1  | -5.414338 | 0.360536  | 1.389324  |
| 1  | -5.988171 | -1.865999 | 0.411442  |
| 6  | -2.538884 | 1.472385  | 0.746597  |
| 6  | -1.933979 | 1.860978  | -0.597400 |
| 1  | -1.461995 | 0.861955  | 1.145563  |
| 1  | -2.524676 | 2.206086  | 1.557907  |
| 79 | 0.711252  | 0.095519  | 0.007787  |
| 15 | 2.997668  | -0.446821 | 0.081956  |
| 6  | 3.605085  | -1.319109 | -1.397491 |
| 1  | 3.446254  | -0.701223 | -2.288121 |
| 1  | 4.677041  | -1.531176 | -1.290871 |
| 1  | 3.062668  | -2.262779 | -1.523452 |
| 6  | 3.468141  | -1.527429 | 1.472278  |
| 1  | 4.546334  | -1.732794 | 1.438131  |
| 1  | 3.224673  | -1.039663 | 2.422708  |
| 1  | 2.919005  | -2.473647 | 1.412548  |
| 6  | 4.090884  | 1.002701  | 0.240227  |
| 1  | 3.859048  | 1.546345  | 1.163092  |
| 1  | 5.140119  | 0.680367  | 0.265035  |
| 1  | 3.941105  | 1.676914  | -0.610403 |
| 1  | -2.647137 | 1.774965  | -1.418712 |
| 6  | -1.050414 | 3.077277  | -0.622772 |
| 1  | -0.403698 | 3.121962  | 0.264335  |
| 1  | -0.405229 | 3.060441  | -1.509214 |
| 1  | -1.654018 | 3.992122  | -0.653374 |

**TSIIa-IndC**

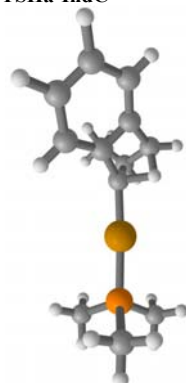

$\Delta E(\text{DCE})$  -983.006724 h.

$\Delta G(\text{DCE})$  -983.053887 h.

|    |           |           |           |
|----|-----------|-----------|-----------|
| 6  | -1.275502 | -0.553936 | 0.010256  |
| 6  | -2.408841 | 0.437083  | 0.138458  |
| 6  | -2.708158 | 1.583705  | 0.840238  |
| 6  | -3.316211 | -0.169345 | -0.731857 |
| 6  | -3.991030 | 2.114407  | 0.624921  |
| 1  | -2.002124 | 2.059454  | 1.519281  |
| 6  | -4.570987 | 0.348927  | -0.968783 |
| 6  | -4.892625 | 1.517406  | -0.257411 |
| 1  | -4.287760 | 3.018849  | 1.153279  |
| 1  | -5.279136 | -0.102067 | -1.660898 |
| 1  | -5.871315 | 1.972377  | -0.400762 |
| 6  | -2.450408 | -1.342720 | -1.075218 |
| 6  | -1.899832 | -1.918098 | 0.225544  |
| 1  | -1.348301 | -0.714956 | -1.340414 |
| 1  | -1.190905 | -2.727331 | 0.022269  |
| 6  | -2.798105 | -2.206395 | 1.397680  |
| 1  | -3.342428 | -3.142601 | 1.229762  |
| 1  | -2.195221 | -2.326405 | 2.305416  |
| 1  | -3.529927 | -1.410515 | 1.576547  |
| 1  | -2.424130 | -1.949741 | -1.984330 |
| 79 | 0.790559  | -0.149036 | -0.049577 |
| 15 | 3.092749  | 0.331686  | -0.002764 |
| 6  | 3.822870  | 0.319591  | 1.666458  |
| 1  | 3.691505  | -0.667714 | 2.123120  |
| 1  | 4.894758  | 0.550132  | 1.607130  |
| 1  | 3.327923  | 1.066435  | 2.296995  |
| 6  | 3.526802  | 1.965928  | -0.681569 |
| 1  | 4.611723  | 2.121498  | -0.617117 |
| 1  | 3.215800  | 2.027511  | -1.730414 |
| 1  | 3.015054  | 2.753611  | -0.117501 |
| 6  | 4.113019  | -0.842701 | -0.952619 |
| 1  | 3.801126  | -0.846042 | -2.003020 |
| 1  | 5.170568  | -0.553731 | -0.891046 |
| 1  | 3.991487  | -1.853311 | -0.546857 |

**Ib**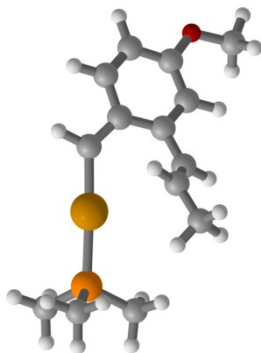 $\Delta E(\text{DCE})$  -1097.493812 h. $\Delta G(\text{DCE})$  -1097.544848 h.

|    |           |           |           |
|----|-----------|-----------|-----------|
| 79 | -1.138502 | -0.584420 | -0.158148 |
| 15 | -3.244360 | 0.204495  | 0.589906  |
| 6  | -4.468529 | 0.457604  | -0.739951 |
| 1  | -4.663815 | -0.491873 | -1.251209 |
| 1  | -5.407889 | 0.843528  | -0.322045 |
| 1  | -4.080919 | 1.174780  | -1.473081 |
| 6  | -4.091866 | -0.889606 | 1.777578  |
| 1  | -3.466388 | -1.029107 | 2.666676  |
| 1  | -5.052843 | -0.451279 | 2.077567  |
| 1  | -4.268795 | -1.869209 | 1.319536  |
| 6  | -3.173553 | 1.816907  | 1.441583  |
| 1  | -2.772485 | 2.580325  | 0.764387  |
| 1  | -4.178063 | 2.118523  | 1.767141  |
| 1  | -2.516422 | 1.747511  | 2.316089  |
| 6  | 0.683136  | -1.355226 | -0.739137 |
| 1  | 0.678626  | -2.385287 | -1.118758 |
| 6  | 1.971514  | -0.854507 | -0.621786 |
| 6  | 3.059316  | -1.793583 | -0.710385 |
| 6  | 2.288244  | 0.493530  | -0.186637 |
| 6  | 4.305399  | -1.504481 | -0.243369 |
| 1  | 2.846919  | -2.784936 | -1.108675 |
| 6  | 3.552869  | 0.758144  | 0.327917  |
| 6  | 4.553407  | -0.222918 | 0.312297  |
| 1  | 5.118517  | -2.226130 | -0.267918 |
| 1  | 3.772848  | 1.763393  | 0.680374  |
| 6  | 1.362720  | 1.602276  | -0.304748 |
| 6  | 0.483130  | 1.766291  | -1.314059 |
| 6  | -0.409572 | 2.944006  | -1.462076 |
| 1  | 0.456071  | 1.028323  | -2.119086 |
| 1  | -1.451442 | 2.623829  | -1.608474 |
| 1  | -0.141809 | 3.525137  | -2.356034 |
| 1  | 1.473567  | 2.404149  | 0.430720  |
| 1  | -0.363313 | 3.606595  | -0.589375 |
| 8  | 5.785179  | -0.034802 | 0.763425  |
| 6  | 6.146478  | 1.219879  | 1.340801  |
| 1  | 7.187606  | 1.113935  | 1.647220  |
| 1  | 6.057879  | 2.022313  | 0.599273  |
| 1  | 5.521630  | 1.435789  | 2.215170  |

**TSIb-IIb**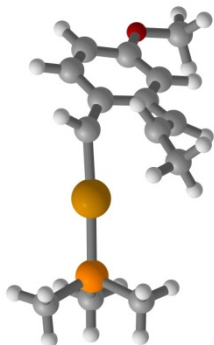 $\Delta E(\text{DCE})$  -1097.476911 h. $\Delta G(\text{DCE})$  -1097.528054 h.

|    |           |          |           |
|----|-----------|----------|-----------|
| 79 | -1.137533 | 0.076999 | -0.434102 |
|----|-----------|----------|-----------|

|    |           |           |           |
|----|-----------|-----------|-----------|
| 15 | -3.112500 | -0.826857 | 0.462508  |
| 6  | -4.484142 | -0.993227 | -0.725967 |
| 1  | -4.192826 | -1.670737 | -1.536306 |
| 1  | -5.371818 | -1.396077 | -0.220663 |
| 1  | -4.726388 | -0.015511 | -1.157294 |
| 6  | -2.927583 | -2.493499 | 1.176532  |
| 1  | -2.193478 | -2.470912 | 1.989778  |
| 1  | -3.891044 | -2.844936 | 1.568854  |
| 1  | -2.575878 | -3.190439 | 0.407533  |
| 6  | -3.802549 | 0.178253  | 1.819266  |
| 1  | -4.041684 | 1.183225  | 1.451787  |
| 1  | -4.714976 | -0.287955 | 2.213841  |
| 1  | -3.064969 | 0.267844  | 2.625034  |
| 6  | 0.626843  | 0.799282  | -1.297979 |
| 1  | 0.512405  | 1.163980  | -2.329945 |
| 6  | 1.944590  | 0.427802  | -0.957362 |
| 6  | 2.846768  | -0.184930 | -1.870352 |
| 6  | 2.377526  | 0.638290  | 0.388543  |
| 6  | 3.995538  | -0.753909 | -1.393532 |
| 1  | 2.578681  | -0.274377 | -2.921932 |
| 6  | 3.560263  | 0.044220  | 0.872662  |
| 6  | 4.351116  | -0.661342 | -0.015991 |
| 1  | 4.672517  | -1.294946 | -2.052169 |
| 1  | 3.855560  | 0.207735  | 1.906376  |
| 6  | 1.539203  | 1.537031  | 1.083820  |
| 6  | 0.672340  | 2.335074  | 0.354908  |
| 6  | -0.478442 | 3.071323  | 0.958744  |
| 1  | 1.029625  | 2.743395  | -0.597392 |
| 1  | -1.287573 | 3.206087  | 0.231546  |
| 1  | -0.153819 | 4.078607  | 1.259074  |
| 1  | 1.506787  | 1.551226  | 2.175443  |
| 1  | -0.881511 | 2.558806  | 1.840428  |
| 8  | 5.511635  | -1.262763 | 0.296422  |
| 6  | 5.964250  | -1.197631 | 1.639955  |
| 1  | 6.891924  | -1.771492 | 1.674304  |
| 1  | 6.163844  | -0.158470 | 1.933730  |
| 1  | 5.229834  | -1.643447 | 2.323559  |

**IIb**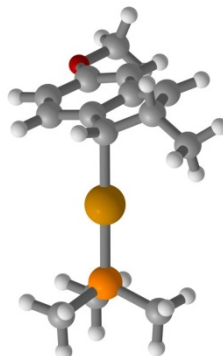 $\Delta E(\text{DCE})$  -1097.523592 h. $\Delta G(\text{DCE})$  -1097.574930 h.

|    |           |           |           |
|----|-----------|-----------|-----------|
| 6  | 3.494482  | 0.058683  | 0.698812  |
| 6  | 2.435291  | 0.950746  | 0.327831  |
| 6  | 1.609825  | 0.693298  | -0.842164 |
| 6  | 1.946759  | -0.401239 | -1.692545 |
| 6  | 2.979613  | -1.209051 | -1.330014 |
| 6  | 3.747207  | -1.001766 | -0.123728 |
| 1  | 4.070738  | 0.258201  | 1.598391  |
| 1  | 1.374801  | -0.590582 | -2.599621 |
| 6  | 0.576595  | 1.656019  | -0.933884 |
| 79 | -1.024296 | 0.266567  | -0.273701 |
| 15 | -2.818508 | -1.098725 | 0.365620  |
| 6  | -2.344079 | -2.778243 | 0.889259  |
| 1  | -1.670152 | -2.723063 | 1.751371  |
| 1  | -3.239904 | -3.349545 | 1.166972  |
| 1  | -1.827646 | -3.292684 | 0.071301  |
| 6  | -4.043361 | -1.356309 | -0.957921 |
| 1  | -4.866051 | -1.983406 | -0.589724 |
| 1  | -4.444817 | -0.392010 | -1.288720 |
| 1  | -3.567429 | -1.850339 | -1.812423 |



|   |           |           |           |
|---|-----------|-----------|-----------|
| 6 | -3.778895 | -0.436189 | 1.764440  |
| 1 | -4.610493 | -1.113226 | 2.000320  |
| 1 | -3.133947 | -0.337627 | 2.644753  |
| 1 | -4.178218 | 0.551612  | 1.509080  |
| 6 | 2.018676  | 2.130694  | 0.879689  |
| 6 | 0.901063  | 2.721590  | 0.099970  |
| 6 | -0.234559 | 3.284224  | 0.951042  |
| 1 | 1.338448  | 3.565456  | -0.472719 |
| 1 | -1.031999 | 3.685208  | 0.314567  |
| 1 | -0.668580 | 2.505281  | 1.592993  |
| 1 | 0.179069  | 1.945309  | -1.912172 |
| 1 | 2.423889  | 2.590567  | 1.779897  |
| 1 | 0.131531  | 4.093872  | 1.594465  |
| 1 | 3.264355  | -2.060394 | -1.947035 |
| 8 | 4.698997  | -1.938994 | 0.061453  |
| 6 | 5.507416  | -1.831623 | 1.220494  |
| 1 | 4.891520  | -1.867230 | 2.129764  |
| 1 | 6.185066  | -2.687000 | 1.201473  |
| 1 | 6.088615  | -0.899327 | 1.205859  |

### TSHb-IIIb

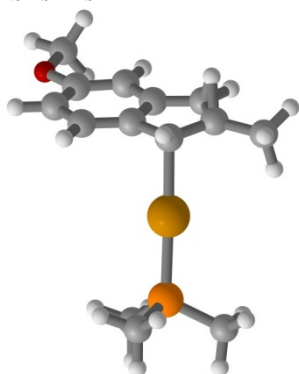

$\Delta E(\text{DCE}) -1097.503991 \text{ h.}$   
 $\Delta G(\text{DCE}) -1097.555021 \text{ h.}$

|    |           |           |           |
|----|-----------|-----------|-----------|
| 6  | 3.653792  | 0.094143  | 0.676603  |
| 6  | 2.511779  | 0.842245  | 0.320052  |
| 6  | 1.714204  | 0.518552  | -0.807524 |
| 6  | 2.101581  | -0.561746 | -1.623973 |
| 6  | 3.213152  | -1.292601 | -1.274557 |
| 6  | 3.986988  | -0.981591 | -0.124209 |
| 1  | 4.233872  | 0.370703  | 1.553662  |
| 1  | 1.521494  | -0.825368 | -2.507784 |
| 1  | 3.532484  | -2.142396 | -1.876327 |
| 6  | 0.601519  | 1.449059  | -0.912139 |
| 79 | -1.114972 | 0.250760  | -0.246566 |
| 15 | -2.957312 | -1.052770 | 0.371985  |
| 6  | -2.521239 | -2.619392 | 1.194023  |
| 1  | -1.955054 | -2.412127 | 2.109024  |
| 1  | -3.431840 | -3.176732 | 1.451438  |
| 1  | -1.899976 | -3.229260 | 0.528812  |
| 6  | -4.004785 | -1.541977 | -1.036067 |
| 1  | -4.851833 | -2.145742 | -0.684840 |
| 1  | -4.385337 | -0.648284 | -1.543212 |
| 1  | -3.417285 | -2.127605 | -1.751905 |
| 6  | -4.099508 | -0.232043 | 1.530428  |
| 1  | -4.935888 | -0.902253 | 1.769157  |
| 1  | -3.570449 | 0.026241  | 2.454558  |
| 1  | -4.490815 | 0.687661  | 1.081509  |
| 6  | 1.964310  | 2.017787  | 0.906323  |
| 6  | 0.826635  | 2.451842  | 0.130828  |
| 6  | -0.133239 | 3.522870  | 0.556238  |
| 1  | 1.926071  | 2.988598  | -0.117656 |
| 1  | -0.670697 | 3.926989  | -0.308927 |
| 1  | -0.872521 | 3.111233  | 1.254054  |
| 1  | 0.239353  | 1.770866  | -1.894478 |
| 1  | 2.305776  | 2.525630  | 1.806748  |
| 1  | 0.382292  | 4.346317  | 1.063565  |
| 8  | 5.039808  | -1.807993 | 0.086515  |
| 6  | 5.876854  | -1.540560 | 1.195454  |
| 1  | 5.318669  | -1.611696 | 2.139638  |
| 1  | 6.659054  | -2.302280 | 1.178332  |

|   |          |           |          |
|---|----------|-----------|----------|
| 1 | 6.334409 | -0.544564 | 1.112601 |
|---|----------|-----------|----------|

### IIIb

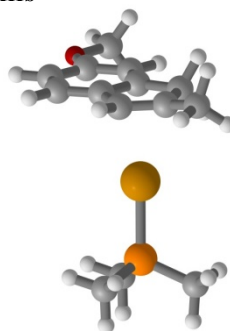

$\Delta E(\text{DCE}) -1097.556006 \text{ h.}$   
 $\Delta G(\text{DCE}) -1097.606620 \text{ h.}$

|    |           |           |           |
|----|-----------|-----------|-----------|
| 6  | -3.386483 | -0.039157 | -0.763626 |
| 6  | -2.301611 | 0.745029  | -0.395133 |
| 6  | -1.811425 | 0.741094  | 0.920214  |
| 6  | -2.419557 | -0.047681 | 1.898063  |
| 6  | -3.512810 | -0.822943 | 1.543586  |
| 6  | -3.994776 | -0.825513 | 0.223557  |
| 1  | -3.751146 | -0.027883 | -1.788590 |
| 1  | -2.047632 | -0.058602 | 2.921843  |
| 1  | -4.021014 | -1.448036 | 2.275724  |
| 6  | -0.647738 | 1.629369  | 0.981793  |
| 79 | 1.108619  | 0.352370  | 0.126441  |
| 15 | 2.785961  | -1.240509 | -0.186760 |
| 6  | 2.144151  | -2.921787 | -0.455397 |
| 1  | 1.507734  | -2.939054 | -1.346999 |
| 1  | 2.979280  | -3.621095 | -0.592861 |
| 1  | 1.548046  | -3.235239 | 0.408613  |
| 6  | 3.923474  | -1.384143 | 1.226384  |
| 1  | 4.678346  | -2.152841 | 1.015126  |
| 1  | 4.423047  | -0.425198 | 1.402134  |
| 1  | 3.366922  | -1.663006 | 2.127791  |
| 6  | 3.853446  | -0.903694 | -1.621746 |
| 1  | 4.621880  | -1.683702 | -1.701533 |
| 1  | 3.253627  | -0.892706 | -2.538507 |
| 1  | 4.338992  | 0.071506  | -1.505818 |
| 6  | -1.471647 | 1.679094  | -1.227413 |
| 6  | -0.421323 | 2.187487  | -0.267022 |
| 6  | 0.448279  | 3.352016  | -0.596595 |
| 1  | -2.060605 | 2.536135  | -1.593683 |
| 1  | -0.172999 | 4.253936  | -0.703086 |
| 1  | 1.191322  | 3.541640  | 0.186650  |
| 1  | -0.183042 | 1.978183  | 1.905360  |
| 1  | -1.039087 | 1.208753  | -2.123677 |
| 1  | 0.970491  | 3.209436  | -1.551464 |
| 8  | -5.064734 | -1.624349 | -0.000660 |
| 6  | -5.601057 | -1.681879 | -1.309263 |
| 1  | -4.859165 | -2.060815 | -2.025994 |
| 1  | -6.444165 | -2.374304 | -1.261703 |
| 1  | -5.958768 | -0.695695 | -1.635920 |

### TSHb-II'b

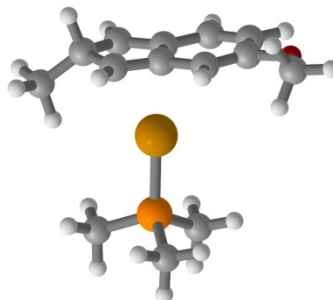

$\Delta E(\text{DCE}) -1097.506008 \text{ h.}$   
 $\Delta G(\text{DCE}) -1097.555155 \text{ h.}$

|    |          |           |           |
|----|----------|-----------|-----------|
| 79 | 0.549090 | 0.045021  | 0.067395  |
| 15 | 2.550360 | -1.091318 | -0.041951 |

|   |           |           |           |
|---|-----------|-----------|-----------|
| 6 | 3.974134  | 0.039698  | -0.095096 |
| 1 | 3.978972  | 0.674524  | 0.797859  |
| 1 | 4.904850  | -0.542201 | -0.132091 |
| 1 | 3.911541  | 0.678196  | -0.983341 |
| 6 | 2.854914  | -2.178002 | 1.383772  |
| 1 | 2.072560  | -2.941566 | 1.450180  |
| 1 | 3.830881  | -2.667644 | 1.267547  |
| 1 | 2.852924  | -1.588598 | 2.307176  |
| 6 | 2.726809  | -2.154159 | -1.505832 |
| 1 | 2.653284  | -1.550303 | -2.416992 |
| 1 | 3.704901  | -2.652339 | -1.478722 |
| 1 | 1.934914  | -2.910779 | -1.517606 |
| 6 | -0.731749 | 2.442402  | 0.957862  |
| 1 | -0.395010 | 2.949840  | 1.858315  |
| 6 | -1.470210 | 1.286518  | 0.900434  |
| 6 | -2.044490 | 0.449916  | 1.931444  |
| 6 | -1.745102 | 0.961632  | -0.526399 |
| 6 | -2.819584 | -0.595129 | 1.568104  |
| 1 | -1.855158 | 0.676740  | 2.979260  |
| 6 | -2.574573 | -0.172190 | -0.853345 |
| 6 | -3.090988 | -0.908166 | 0.171825  |
| 1 | -3.278768 | -1.245084 | 2.310836  |
| 1 | -2.780131 | -0.395591 | -1.897179 |
| 6 | -1.146387 | 1.922646  | -1.305458 |
| 6 | -0.551302 | 2.975907  | -0.425204 |
| 1 | -1.184842 | 1.989831  | -2.389640 |
| 1 | -1.251129 | 3.838518  | -0.486117 |
| 6 | 0.842134  | 3.477186  | -0.788342 |
| 1 | 0.858341  | 3.868585  | -1.812434 |
| 1 | 1.159632  | 4.277004  | -0.108584 |
| 1 | 1.575843  | 2.659901  | -0.722626 |
| 8 | -3.894764 | -1.979820 | 0.035856  |
| 6 | -4.246052 | -2.379461 | -1.278184 |
| 1 | -3.352052 | -2.657475 | -1.852834 |
| 1 | -4.898666 | -3.247546 | -1.169824 |
| 1 | -4.783631 | -1.575164 | -1.798431 |

**$\Pi^b$**

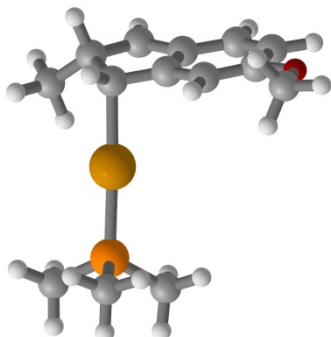

$\Delta E(\text{DCE})$  -1097.530057 h.

$\Delta G(\text{DCE})$ -1097.581629 h.

|    |           |           |           |
|----|-----------|-----------|-----------|
| 79 | 0.873934  | 0.198482  | -0.310169 |
| 15 | 2.792071  | -0.949718 | 0.407534  |
| 6  | 4.270697  | 0.107294  | 0.544050  |
| 1  | 4.096643  | 0.898336  | 1.282270  |
| 1  | 5.135789  | -0.493211 | 0.855421  |
| 1  | 4.484960  | 0.573332  | -0.424314 |
| 6  | 2.641690  | -1.734754 | 2.045472  |
| 1  | 1.812655  | -2.451122 | 2.040963  |
| 1  | 3.572474  | -2.260089 | 2.297099  |
| 1  | 2.441827  | -0.971850 | 2.806194  |
| 6  | 3.304136  | -2.302394 | -0.701775 |
| 1  | 3.508399  | -1.904777 | -1.702188 |
| 1  | 4.210781  | -2.784395 | -0.312461 |
| 1  | 2.503774  | -3.046904 | -0.776820 |
| 6  | -1.862826 | 2.624045  | 0.634070  |
| 1  | -2.044545 | 3.445345  | 1.326168  |
| 6  | -2.423262 | 1.383632  | 0.709914  |
| 6  | -3.409568 | 0.845633  | 1.602157  |
| 6  | -1.910877 | 0.578239  | -0.388309 |
| 6  | -3.902073 | -0.391458 | 1.353204  |
| 1  | -3.759513 | 1.434046  | 2.448235  |

|   |           |           |           |
|---|-----------|-----------|-----------|
| 6 | -2.468673 | -0.687158 | -0.647338 |
| 6 | -3.447479 | -1.152078 | 0.212343  |
| 1 | -4.661229 | -0.849532 | 1.983379  |
| 1 | -2.113134 | -1.277195 | -1.489209 |
| 6 | -0.872599 | 1.295069  | -1.060856 |
| 6 | -0.949708 | 2.727216  | -0.532057 |
| 1 | -0.767759 | 1.150868  | -2.142125 |
| 1 | -1.507842 | 3.309578  | -1.294153 |
| 6 | 0.348225  | 3.476298  | -0.244016 |
| 1 | 0.987691  | 3.495019  | -1.134425 |
| 1 | 0.140081  | 4.512621  | 0.051169  |
| 1 | 0.908741  | 2.991942  | 0.567619  |
| 8 | -4.064048 | -2.326819 | 0.087942  |
| 6 | -3.720633 | -3.170959 | -1.005779 |
| 1 | -2.667977 | -3.472684 | -0.943666 |
| 1 | -4.362630 | -4.048670 | -0.920067 |
| 1 | -3.910977 | -2.662120 | -1.958739 |

**$\text{TS}\Pi^b\text{-III}^b$**

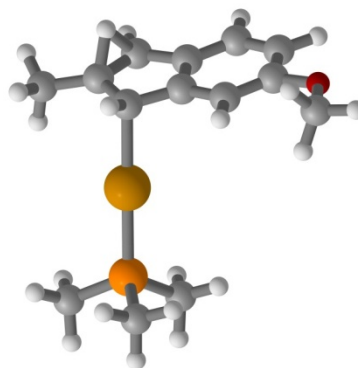

$\Delta E(\text{DCE})$  -1097.508858 h.

$\Delta G(\text{DCE})$ -1097.559719 h.

|    |           |           |           |
|----|-----------|-----------|-----------|
| 79 | 0.927027  | 0.198600  | -0.287699 |
| 15 | 2.830676  | -0.977443 | 0.398973  |
| 6  | 4.321019  | 0.054712  | 0.581002  |
| 1  | 4.151686  | 0.822262  | 1.344465  |
| 1  | 5.174887  | -0.568333 | 0.878600  |
| 1  | 4.550011  | 0.549706  | -0.369330 |
| 6  | 2.655794  | -1.814276 | 2.008080  |
| 1  | 1.820573  | -2.522450 | 1.971849  |
| 1  | 3.579402  | -2.356125 | 2.251000  |
| 1  | 2.455299  | -1.074816 | 2.791362  |
| 6  | 3.327254  | -2.298843 | -0.753522 |
| 1  | 3.543513  | -1.872052 | -1.739279 |
| 1  | 4.223413  | -2.808298 | -0.375292 |
| 1  | 2.515332  | -3.027281 | -0.856921 |
| 6  | -1.718297 | 2.575638  | 0.749452  |
| 1  | -1.799580 | 3.390928  | 1.466415  |
| 6  | -2.427230 | 1.341918  | 0.764346  |
| 6  | -3.480448 | 0.881594  | 1.580550  |
| 6  | -1.953816 | 0.555868  | -0.320541 |
| 6  | -4.041822 | -0.339537 | 1.302264  |
| 1  | -3.839031 | 1.480107  | 2.416398  |
| 6  | -2.557620 | -0.673275 | -0.622610 |
| 6  | -3.592690 | -1.109609 | 0.194904  |
| 1  | -4.851310 | -0.744321 | 1.906312  |
| 1  | -2.205304 | -1.260735 | -1.467864 |
| 6  | -0.865916 | 1.257964  | -0.988196 |
| 6  | -0.795586 | 2.577563  | -0.356663 |
| 1  | -0.743694 | 1.176902  | -2.073186 |
| 1  | -1.926866 | 3.132523  | -0.502265 |
| 6  | 0.260323  | 3.615334  | -0.588363 |
| 1  | 0.569068  | 3.625742  | -1.639726 |
| 1  | -0.092441 | 4.617047  | -0.317349 |
| 1  | 1.143896  | 3.394164  | 0.023011  |
| 8  | -4.253044 | -2.271249 | 0.021748  |
| 6  | -3.885260 | -3.098763 | -1.068830 |
| 1  | -2.841094 | -3.426847 | -0.978847 |
| 1  | -4.544825 | -3.967658 | -1.026804 |
| 1  | -4.028061 | -2.575950 | -2.024110 |

**III'b**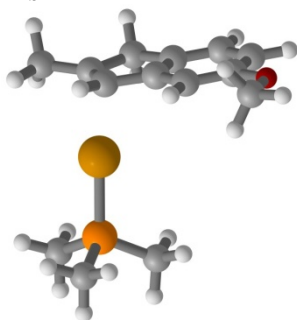 $\Delta E(\text{DCE})$  -1097.556038 h. $\Delta G(\text{DCE})$  -1097.607252 h.

|    |           |           |           |
|----|-----------|-----------|-----------|
| 79 | 0.981714  | 0.254864  | -0.260727 |
| 15 | 2.728492  | -1.177952 | 0.325534  |
| 6  | 4.281657  | -0.304814 | 0.696857  |
| 1  | 4.132614  | 0.383518  | 1.535770  |
| 1  | 5.059970  | -1.033336 | 0.959478  |
| 1  | 4.604506  | 0.269987  | -0.178099 |
| 6  | 2.384877  | -2.187250 | 1.799110  |
| 1  | 1.510997  | -2.822969 | 1.619640  |
| 1  | 3.253270  | -2.819690 | 2.025372  |
| 1  | 2.177449  | -1.538270 | 2.656970  |
| 6  | 3.159079  | -2.368525 | -0.981805 |
| 1  | 3.445213  | -1.832765 | -1.893692 |
| 1  | 3.999995  | -2.991826 | -0.650111 |
| 1  | 2.299340  | -3.009734 | -1.205024 |
| 6  | -1.097897 | 2.363262  | 0.977510  |
| 1  | -0.410366 | 2.278802  | 1.833398  |
| 6  | -2.114417 | 1.262793  | 0.897985  |
| 6  | -3.056563 | 0.823149  | 1.821064  |
| 6  | -2.021270 | 0.629288  | -0.349148 |
| 6  | -3.898568 | -0.228734 | 1.479527  |
| 1  | -3.148441 | 1.295105  | 2.798876  |
| 6  | -2.856013 | -0.428542 | -0.709549 |
| 6  | -3.806254 | -0.850978 | 0.223789  |
| 1  | -4.652201 | -0.592191 | 2.176225  |
| 1  | -2.755894 | -0.897839 | -1.685668 |
| 6  | -0.930272 | 1.262259  | -1.104397 |
| 6  | -0.378879 | 2.283393  | -0.346673 |
| 1  | -0.754261 | 1.123794  | -2.172485 |
| 1  | -1.562439 | 3.359277  | 1.066427  |
| 6  | 0.551686  | 3.350557  | -0.806099 |
| 1  | 1.012539  | 3.106550  | -1.769930 |
| 1  | -0.003978 | 4.293015  | -0.921040 |
| 1  | 1.344538  | 3.537520  | -0.070544 |
| 8  | -4.686384 | -1.860279 | 0.009348  |
| 6  | -4.647965 | -2.530023 | -1.236171 |
| 1  | -3.673404 | -3.011979 | -1.398632 |
| 1  | -5.426634 | -3.294629 | -1.194267 |
| 1  | -4.859733 | -1.840115 | -2.064993 |

**Ibb**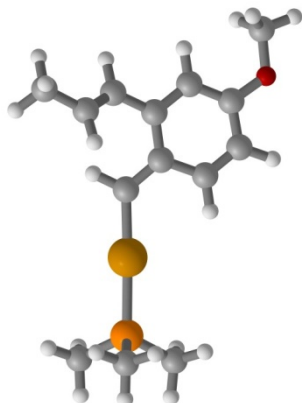 $\Delta E(\text{DCE})$  -1097.493511 h. $\Delta G(\text{DCE})$  -1097.546308 h.

|    |           |           |           |
|----|-----------|-----------|-----------|
| 79 | -1.372567 | 0.145711  | -0.126878 |
| 15 | -3.660100 | -0.458185 | 0.082916  |
| 6  | -4.405925 | -0.006685 | 1.685677  |
| 1  | -4.330461 | 1.075700  | 1.838822  |
| 1  | -5.463567 | -0.301349 | 1.705690  |
| 1  | -3.875857 | -0.512487 | 2.500657  |
| 6  | -4.753790 | 0.323551  | -1.150524 |
| 1  | -4.444816 | 0.033014  | -2.160951 |
| 1  | -5.793532 | 0.010379  | -0.987097 |
| 1  | -4.688929 | 1.414185  | -1.065593 |
| 6  | -4.008163 | -2.241920 | -0.078511 |
| 1  | -3.476320 | -2.796922 | 0.702528  |
| 1  | -5.086364 | -2.424390 | 0.021318  |
| 1  | -3.670614 | -2.603336 | -1.056284 |
| 6  | 0.586305  | 0.739057  | -0.313456 |
| 1  | 0.768117  | 1.715538  | -0.775707 |
| 6  | 1.742988  | 0.053716  | 0.021243  |
| 6  | 1.654673  | -1.343155 | 0.350642  |
| 6  | 3.069079  | 0.624563  | -0.130733 |
| 6  | 2.751357  | -2.149455 | 0.376480  |
| 1  | 0.661617  | -1.757763 | 0.522964  |
| 6  | 4.173840  | -0.218914 | -0.144022 |
| 6  | 4.026670  | -1.591782 | 0.097546  |
| 1  | 2.686536  | -3.214558 | 0.585877  |
| 1  | 5.162073  | 0.212547  | -0.286821 |
| 6  | 3.303695  | 2.053262  | -0.236198 |
| 6  | 2.585998  | 3.008154  | 0.386214  |
| 6  | 2.876647  | 4.461228  | 0.297630  |
| 1  | 1.758439  | 2.716439  | 1.038323  |
| 1  | 3.067720  | 4.884155  | 1.293544  |
| 1  | 2.008577  | 5.003597  | -0.103338 |
| 1  | 3.740536  | 4.668256  | -0.344682 |
| 1  | 4.196345  | 2.351674  | -0.792834 |
| 8  | 5.033095  | -2.452546 | 0.115810  |
| 6  | 6.358022  | -2.003995 | -0.171928 |
| 1  | 6.984041  | -2.896294 | -0.139219 |
| 1  | 6.403705  | -1.554829 | -1.170696 |
| 1  | 6.693934  | -1.287318 | 0.586297  |

**TSIbb-IIbb**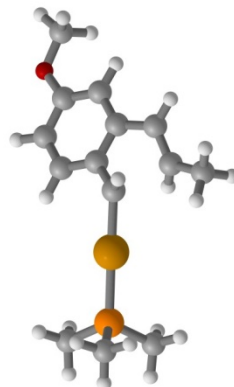 $\Delta E(\text{DCE})$  -1097.474331 h. $\Delta G(\text{DCE})$  -1097.526850 h.

|    |           |           |           |
|----|-----------|-----------|-----------|
| 79 | -1.267440 | 0.087089  | -0.224920 |
| 15 | -3.467289 | -0.657597 | 0.258470  |
| 6  | -4.154660 | 0.011433  | 1.810642  |
| 1  | -4.194571 | 1.105397  | 1.759678  |
| 1  | -5.168276 | -0.378483 | 1.972935  |
| 1  | -3.519152 | -0.276328 | 2.655746  |
| 6  | -4.721012 | -0.232909 | -0.996710 |
| 1  | -4.451577 | -0.678911 | -1.960762 |
| 1  | -5.704563 | -0.610414 | -0.686391 |
| 1  | -4.775379 | 0.854867  | -1.117500 |
| 6  | -3.623725 | -2.465401 | 0.445129  |
| 1  | -2.971659 | -2.815204 | 1.253536  |
| 1  | -4.662841 | -2.732135 | 0.678977  |
| 1  | -3.325817 | -2.963582 | -0.484508 |
| 6  | 0.651613  | 0.751938  | -0.638267 |

|   |           |           |           |
|---|-----------|-----------|-----------|
| 1 | 0.741192  | 1.473519  | -1.456301 |
| 6 | 1.858774  | 0.051411  | -0.320387 |
| 6 | 1.996437  | -1.355296 | -0.294524 |
| 6 | 3.000027  | 0.847912  | -0.008167 |
| 6 | 3.246096  | -1.903821 | -0.151891 |
| 1 | 1.126590  | -1.988051 | -0.462922 |
| 6 | 4.284182  | 0.284113  | 0.124440  |
| 6 | 4.398169  | -1.092276 | 0.045527  |
| 1 | 3.393421  | -2.981615 | -0.194301 |
| 1 | 5.135207  | 0.924787  | 0.342900  |
| 6 | 2.634423  | 2.199211  | 0.188724  |
| 6 | 1.290021  | 2.457242  | 0.422734  |
| 1 | 0.773429  | 1.807533  | 1.138323  |
| 1 | 3.352231  | 3.012178  | 0.058368  |
| 6 | 0.639598  | 3.780026  | 0.196172  |
| 1 | 0.505011  | 4.317128  | 1.144717  |
| 1 | 1.216038  | 4.412358  | -0.488127 |
| 1 | -0.363748 | 3.637490  | -0.228363 |
| 8 | 5.546448  | -1.778216 | 0.180524  |
| 6 | 6.745878  | -1.046778 | 0.380481  |
| 1 | 6.696943  | -0.460154 | 1.307547  |
| 1 | 7.542061  | -1.788952 | 0.461163  |
| 1 | 6.946058  | -0.382587 | -0.470693 |

### Ibb

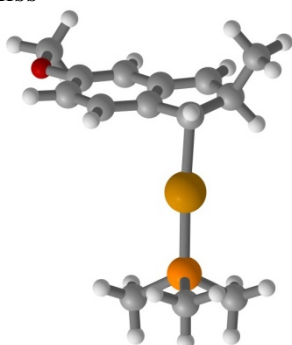

$\Delta E(\text{DCE}) -1097.522724 \text{ h.}$   
 $\Delta G(\text{DCE}) -1097.573536 \text{ h.}$

|    |           |           |           |
|----|-----------|-----------|-----------|
| 79 | -1.092135 | 0.300519  | -0.194426 |
| 15 | -2.980463 | -1.000484 | 0.294510  |
| 6  | -3.767575 | -0.577101 | 1.882256  |
| 1  | -4.084455 | 0.471774  | 1.873888  |
| 1  | -4.643209 | -1.218651 | 2.047614  |
| 1  | -3.053932 | -0.721796 | 2.700965  |
| 6  | -4.314860 | -0.846749 | -0.935986 |
| 1  | -3.955981 | -1.173792 | -1.918242 |
| 1  | -5.171307 | -1.466538 | -0.639468 |
| 1  | -4.634980 | 0.198527  | -1.009149 |
| 6  | -2.657191 | -2.790339 | 0.406355  |
| 1  | -1.913842 | -2.986146 | 1.187099  |
| 1  | -3.586194 | -3.322569 | 0.650167  |
| 1  | -2.268625 | -3.160217 | -0.548986 |
| 6  | 0.605624  | 1.631066  | -0.656233 |
| 1  | 0.253148  | 2.083704  | -1.588850 |
| 6  | 1.606252  | 0.631097  | -0.685728 |
| 6  | 1.924663  | -0.348189 | -1.672420 |
| 6  | 2.424117  | 0.705399  | 0.514990  |
| 6  | 2.949024  | -1.209572 | -1.425765 |
| 1  | 1.351754  | -0.403190 | -2.596722 |
| 6  | 3.467046  | -0.245489 | 0.763352  |
| 6  | 3.716175  | -1.178456 | -0.202340 |
| 1  | 3.227128  | -1.968242 | -2.155996 |
| 1  | 4.038034  | -0.190039 | 1.686910  |
| 6  | 2.031507  | 1.808685  | 1.221769  |
| 6  | 0.922143  | 2.516102  | 0.537705  |
| 1  | 0.069044  | 2.602666  | 1.237489  |
| 1  | 2.453461  | 2.138382  | 2.169730  |
| 6  | 1.311715  | 3.939315  | 0.108016  |
| 1  | 1.599318  | 4.544779  | 0.975345  |
| 1  | 2.157610  | 3.904909  | -0.591085 |
| 1  | 0.466958  | 4.427651  | -0.391655 |
| 8  | 4.666035  | -2.134265 | -0.149079 |

|   |          |           |          |
|---|----------|-----------|----------|
| 6 | 5.487250 | -2.174014 | 1.005024 |
| 1 | 4.888052 | -2.373262 | 1.904090 |
| 1 | 6.196163 | -2.989151 | 0.848825 |
| 1 | 6.033813 | -1.228937 | 1.126708 |

### TSIIbb-IIIbb

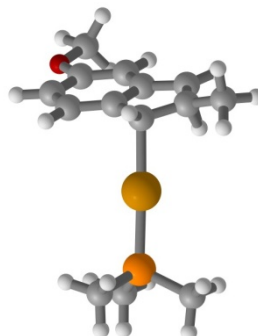

$\Delta E(\text{DCE}) -1097.503443 \text{ h.}$   
 $\Delta G(\text{DCE}) -1097.554456 \text{ h.}$

|    |           |           |           |
|----|-----------|-----------|-----------|
| 79 | -1.135691 | 0.256607  | -0.232244 |
| 15 | -2.996006 | -1.039930 | 0.361678  |
| 6  | -2.576937 | -2.573745 | 1.252164  |
| 1  | -2.041855 | -2.331620 | 2.177205  |
| 1  | -3.491714 | -3.128843 | 1.499305  |
| 1  | -1.931192 | -3.200990 | 0.627617  |
| 6  | -4.183869 | -0.190003 | 1.450959  |
| 1  | -4.568465 | 0.709138  | 0.957007  |
| 1  | -5.021518 | -0.859985 | 1.685798  |
| 1  | -3.687548 | 0.106429  | 2.381745  |
| 6  | -3.987211 | -1.590160 | -1.064384 |
| 1  | -3.374083 | -2.216181 | -1.722471 |
| 1  | -4.854401 | -2.169213 | -0.720570 |
| 1  | -4.335915 | -0.721045 | -1.633218 |
| 6  | 0.611421  | 1.435275  | -0.843577 |
| 1  | 0.224858  | 1.816090  | -1.794699 |
| 6  | 1.741380  | 0.521844  | -0.793694 |
| 6  | 2.077747  | -0.587423 | -1.594248 |
| 6  | 2.562343  | 0.835572  | 0.319009  |
| 6  | 3.194474  | -1.323788 | -1.274585 |
| 1  | 1.465447  | -0.856719 | -2.454345 |
| 6  | 3.683051  | 0.055823  | 0.671538  |
| 6  | 3.997125  | -1.015449 | -0.144266 |
| 1  | 3.493072  | -2.177012 | -1.882099 |
| 1  | 4.276073  | 0.318510  | 1.544137  |
| 6  | 2.032367  | 2.010602  | 0.931243  |
| 6  | 0.842416  | 2.408644  | 0.223494  |
| 1  | 0.719981  | 1.768742  | 1.313405  |
| 1  | 2.437291  | 2.555549  | 1.782102  |
| 6  | 0.171945  | 3.738814  | 0.329247  |
| 1  | 0.294901  | 4.182523  | 1.323190  |
| 1  | 0.622484  | 4.422602  | -0.401683 |
| 1  | -0.897574 | 3.657922  | 0.105700  |
| 8  | 5.053018  | -1.844703 | 0.039512  |
| 6  | 5.912178  | -1.589066 | 1.134283  |
| 1  | 5.373384  | -1.671140 | 2.088792  |
| 1  | 6.694315  | -2.349923 | 1.092430  |
| 1  | 6.367392  | -0.591859 | 1.053540  |

### IIIbb

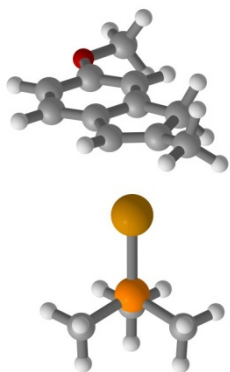

$\Delta E(\text{DCE})$  -1097.556262 h.

$\Delta G(\text{DCE})$  -1097.607248 h.

|    |           |           |           |
|----|-----------|-----------|-----------|
| 79 | 1.106977  | 0.345768  | 0.119064  |
| 15 | 2.804638  | -1.226835 | -0.189952 |
| 6  | 2.216748  | -2.827449 | -0.824355 |
| 1  | 1.733694  | -2.688138 | -1.797838 |
| 1  | 3.064692  | -3.515951 | -0.936351 |
| 1  | 1.489384  | -3.260181 | -0.128724 |
| 6  | 4.093279  | -0.693127 | -1.358814 |
| 1  | 4.555055  | 0.235572  | -1.005598 |
| 1  | 4.862817  | -1.471843 | -1.442033 |
| 1  | 3.652104  | -0.514950 | -2.345452 |
| 6  | 3.696735  | -1.621298 | 1.346945  |
| 1  | 3.000183  | -2.024461 | 2.090014  |
| 1  | 4.476672  | -2.365837 | 1.140097  |
| 1  | 4.160465  | -0.715424 | 1.752652  |
| 6  | -0.651161 | 1.608893  | 0.992997  |
| 1  | -0.183146 | 1.947135  | 1.918823  |
| 6  | -1.816080 | 0.722824  | 0.925640  |
| 6  | -2.423056 | -0.074566 | 1.897204  |
| 6  | -2.311185 | 0.742590  | -0.387688 |
| 6  | -3.520755 | -0.841784 | 1.538798  |
| 1  | -2.046985 | -0.098032 | 2.919266  |
| 6  | -3.400583 | -0.033289 | -0.760248 |
| 6  | -4.008336 | -0.827565 | 0.220905  |
| 1  | -4.028376 | -1.472886 | 2.266168  |
| 1  | -3.769703 | -0.009215 | -1.783395 |
| 6  | -1.482360 | 1.683862  | -1.212708 |
| 6  | -0.428174 | 2.180485  | -0.250425 |
| 1  | -1.053499 | 1.222535  | -2.115376 |
| 1  | -2.071129 | 2.545611  | -1.568062 |
| 6  | 0.440223  | 3.348800  | -0.570259 |
| 1  | 0.958206  | 3.217060  | -1.528966 |
| 1  | -0.181488 | 4.251906  | -0.663604 |
| 1  | 1.186703  | 3.529490  | 0.211826  |
| 8  | -5.083370 | -1.618358 | -0.007693 |
| 6  | -5.625320 | -1.657597 | -1.314665 |
| 1  | -4.889011 | -2.034210 | -2.038349 |
| 1  | -6.473560 | -2.344014 | -1.271377 |
| 1  | -5.976705 | -0.665142 | -1.628933 |

**TSHbb-II'bb**

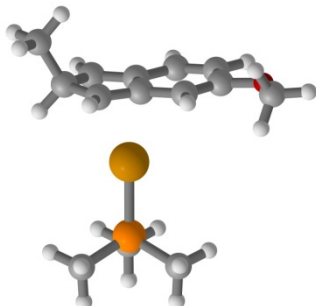

$\Delta E(\text{DCE})$  -1097.503492 h.

$\Delta G(\text{DCE})$  -1097.553766 h.

|    |          |           |           |
|----|----------|-----------|-----------|
| 79 | 0.650896 | 0.168444  | 0.035710  |
| 15 | 2.793318 | -0.667761 | -0.078405 |
| 6  | 3.849107 | 0.219909  | -1.262902 |

|   |           |           |           |
|---|-----------|-----------|-----------|
| 1 | 3.929810  | 1.274293  | -0.976920 |
| 1 | 4.850073  | -0.231326 | -1.270336 |
| 1 | 3.416194  | 0.157397  | -2.267089 |
| 6 | 3.688141  | -0.609061 | 1.503810  |
| 1 | 3.148506  | -1.190740 | 2.259176  |
| 1 | 4.693890  | -1.029983 | 1.372183  |
| 1 | 3.771348  | 0.427179  | 1.848821  |
| 6 | 2.848594  | -2.410547 | -0.592593 |
| 1 | 2.404202  | -2.522851 | -1.587527 |
| 1 | 3.892267  | -2.750379 | -0.619202 |
| 1 | 2.285993  | -3.026618 | 0.117183  |
| 6 | -1.063967 | 2.254677  | 0.947880  |
| 1 | -0.827805 | 2.828801  | 1.840278  |
| 6 | -1.568750 | 0.980429  | 0.911612  |
| 6 | -1.963656 | 0.063951  | 1.959364  |
| 6 | -1.805115 | 0.596883  | -0.508914 |
| 6 | -2.548367 | -1.104616 | 1.618027  |
| 1 | -1.801306 | 0.332540  | 3.001737  |
| 6 | -2.418737 | -0.673196 | -0.811702 |
| 6 | -2.780316 | -1.476727 | 0.228656  |
| 1 | -2.876422 | -1.816413 | 2.373536  |
| 1 | -2.598603 | -0.944413 | -1.848982 |
| 6 | -1.416219 | 1.646842  | -1.303622 |
| 6 | -1.006449 | 2.803275  | -0.442935 |
| 1 | 0.003662  | 3.170705  | -0.691627 |
| 1 | -1.504350 | 1.700837  | -2.385663 |
| 6 | -1.985741 | 3.982338  | -0.601006 |
| 1 | -1.979910 | 4.344538  | -1.635496 |
| 1 | -3.006196 | 3.666012  | -0.347972 |
| 1 | -1.701998 | 4.810671  | 0.058722  |
| 8 | -3.379968 | -2.677068 | 0.114995  |
| 6 | -3.678132 | -3.146467 | -1.189202 |
| 1 | -2.760273 | -3.263231 | -1.781095 |
| 1 | -4.158226 | -4.118436 | -1.061522 |
| 1 | -4.364051 | -2.458847 | -1.701989 |

**II'bb**

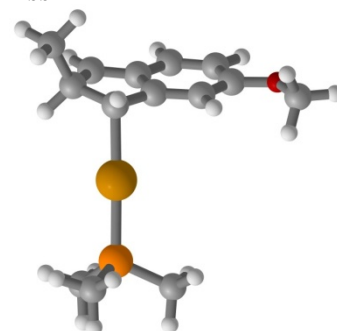

$\Delta E(\text{DCE})$  -1097.529760 h.

$\Delta G(\text{DCE})$  -1097.582896 h.

|    |           |           |           |
|----|-----------|-----------|-----------|
| 79 | 0.938201  | 0.281712  | -0.259970 |
| 15 | 2.960289  | -0.760589 | 0.325603  |
| 6  | 4.305337  | -0.512464 | -0.879404 |
| 1  | 4.522807  | 0.556519  | -0.981896 |
| 1  | 5.210263  | -1.034740 | -0.541776 |
| 1  | 4.006781  | -0.904520 | -1.858049 |
| 6  | 3.663229  | -0.197502 | 1.910310  |
| 1  | 2.953856  | -0.391882 | 2.722511  |
| 1  | 4.601265  | -0.730262 | 2.115418  |
| 1  | 3.862211  | 0.879327  | 1.869220  |
| 6  | 2.842023  | -2.571070 | 0.502016  |
| 1  | 2.501738  | -3.015440 | -0.440024 |
| 1  | 3.823753  | -2.987868 | 0.764023  |
| 1  | 2.120960  | -2.821829 | 1.288068  |
| 6  | -1.942127 | 2.355294  | 1.022453  |
| 1  | -2.173672 | 3.082885  | 1.799120  |
| 6  | -2.438462 | 1.087908  | 0.949497  |
| 6  | -3.392445 | 0.401491  | 1.772979  |
| 6  | -1.892818 | 0.442252  | -0.235228 |
| 6  | -3.816941 | -0.824686 | 1.385324  |
| 1  | -3.771404 | 0.870474  | 2.679030  |
| 6  | -2.373571 | -0.819964 | -0.629613 |
| 6  | -3.321112 | -1.431278 | 0.171691  |

|   |           |           |           |
|---|-----------|-----------|-----------|
| 1 | -4.548222 | -1.391423 | 1.957611  |
| 1 | -1.986199 | -1.290250 | -1.530461 |
| 6 | -0.910422 | 1.294342  | -0.829274 |
| 6 | -1.032091 | 2.639019  | -0.113438 |
| 1 | -0.069939 | 3.013140  | 0.280838  |
| 1 | -0.834881 | 1.304516  | -1.922753 |
| 6 | -1.607267 | 3.727915  | -1.034436 |
| 1 | -0.915894 | 3.917292  | -1.863791 |
| 1 | -2.569202 | 3.401234  | -1.451765 |
| 1 | -1.762204 | 4.667681  | -0.491343 |
| 8 | -3.867959 | -2.620730 | -0.075953 |
| 6 | -3.478428 | -3.330918 | -1.247096 |
| 1 | -4.059817 | -4.253878 | -1.243578 |
| 1 | -3.712701 | -2.747484 | -2.146058 |
| 1 | -2.407432 | -3.566068 | -1.217833 |

**TSII'bb-III'bb**

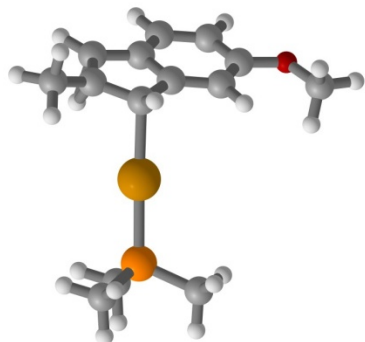

$\Delta E(\text{DCE})$  -1097.506978 h.

$\Delta G(\text{DCE})$  -1097.558189 h.

|    |           |           |           |
|----|-----------|-----------|-----------|
| 79 | 0.944157  | 0.227374  | -0.259697 |
| 15 | 2.880096  | -0.928634 | 0.380470  |
| 6  | 4.430718  | -0.160175 | -0.189535 |
| 1  | 4.525938  | 0.846870  | 0.231945  |
| 1  | 5.287521  | -0.768342 | 0.129765  |
| 1  | 4.430060  | -0.084879 | -1.282617 |
| 6  | 3.096291  | -1.109444 | 2.180471  |
| 1  | 2.236659  | -1.636054 | 2.609663  |
| 1  | 4.011486  | -1.678516 | 2.391609  |
| 1  | 3.171716  | -0.121077 | 2.647454  |
| 6  | 2.954443  | -2.631666 | -0.263851 |
| 1  | 2.922058  | -2.615797 | -1.359041 |
| 1  | 3.884532  | -3.114514 | 0.063816  |
| 1  | 2.098691  | -3.208285 | 0.104411  |
| 6  | -1.891608 | 2.565590  | 0.760737  |
| 1  | -2.123079 | 3.423079  | 1.390013  |
| 6  | -2.554843 | 1.302798  | 0.734263  |
| 6  | -3.596852 | 0.787844  | 1.529801  |
| 6  | -1.995372 | 0.531785  | -0.318852 |
| 6  | -4.098407 | -0.454623 | 1.229505  |
| 1  | -4.011496 | 1.370342  | 2.350810  |
| 6  | -2.501292 | -0.745114 | -0.608120 |
| 6  | -3.559745 | -1.215593 | 0.158023  |
| 1  | -4.919647 | -0.888696 | 1.796408  |
| 1  | -2.066883 | -1.336001 | -1.412117 |
| 6  | -0.878237 | 1.262232  | -0.904770 |
| 6  | -0.877105 | 2.575626  | -0.256029 |
| 1  | -0.557182 | 2.378127  | 0.977012  |
| 1  | -0.698937 | 1.246724  | -1.985047 |
| 6  | -0.172670 | 3.784598  | -0.774201 |
| 1  | 0.831042  | 3.532281  | -1.134001 |
| 1  | -0.744681 | 4.189990  | -1.619011 |
| 1  | -0.092308 | 4.570767  | -0.015539 |
| 8  | -4.158455 | -2.409950 | -0.030883 |
| 6  | -3.685024 | -3.238469 | -1.077954 |
| 1  | -4.303349 | -4.138012 | -1.058023 |
| 1  | -3.792516 | -2.741271 | -2.051564 |
| 1  | -2.633594 | -3.512500 | -0.916738 |

**Ic**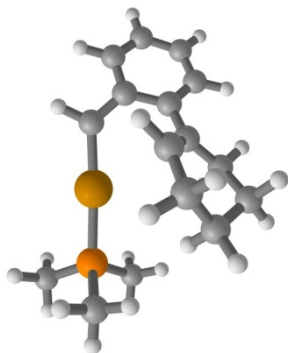 $\Delta E(\text{DCE})$  -1099.637072 h. $\Delta G(\text{DCE})$  -1099.686760 h.

|    |           |           |           |
|----|-----------|-----------|-----------|
| 79 | -0.654748 | -0.843141 | -0.203598 |
| 15 | -2.861800 | -0.244870 | 0.423938  |
| 6  | -3.723969 | 0.902954  | -0.702768 |
| 1  | -3.784915 | 0.464773  | -1.705343 |
| 1  | -4.739466 | 1.095035  | -0.331645 |
| 1  | -3.184083 | 1.855049  | -0.769366 |
| 6  | -3.995311 | -1.668833 | 0.542075  |
| 1  | -3.607868 | -2.394136 | 1.266544  |
| 1  | -4.990997 | -1.334187 | 0.861964  |
| 1  | -4.076986 | -2.159807 | -0.434419 |
| 6  | -2.979653 | 0.551915  | 2.061592  |
| 1  | -2.381755 | 1.470920  | 2.082557  |
| 1  | -4.025413 | 0.798554  | 2.287977  |
| 1  | -2.596264 | -0.129282 | 2.829817  |
| 6  | 1.229290  | -1.524372 | -0.674405 |
| 1  | 1.293256  | -2.506549 | -1.162356 |
| 6  | 2.491227  | -1.011144 | -0.359547 |
| 6  | 3.577564  | -1.941650 | -0.328624 |
| 6  | 2.694903  | 0.319819  | 0.165551  |
| 6  | 4.739755  | -1.650600 | 0.344864  |
| 1  | 3.436759  | -2.917227 | -0.792531 |
| 6  | 3.875533  | 0.567246  | 0.873694  |
| 6  | 4.873333  | -0.395245 | 0.960633  |
| 1  | 5.545620  | -2.378230 | 0.404045  |
| 1  | 4.053224  | 1.548494  | 1.307885  |
| 1  | 5.794298  | -0.153855 | 1.488876  |
| 6  | 1.724487  | 1.372074  | -0.087396 |
| 6  | 1.108359  | 1.436835  | -1.296984 |
| 6  | 1.417834  | 2.376199  | 0.996295  |
| 6  | 0.082576  | 2.458245  | -1.658852 |
| 1  | 1.430039  | 0.759858  | -2.090158 |
| 6  | 0.682812  | 3.604111  | 0.473583  |
| 1  | 0.804820  | 1.868683  | 1.764434  |
| 1  | 2.337429  | 2.680602  | 1.514407  |
| 6  | -0.460857 | 3.192645  | -0.441913 |
| 1  | -0.724200 | 1.968376  | -2.226546 |
| 1  | 0.534879  | 3.173781  | -2.368048 |
| 1  | 0.317031  | 4.203082  | 1.317687  |
| 1  | 1.384666  | 4.241578  | -0.088434 |
| 1  | -1.055613 | 4.061372  | -0.753623 |
| 1  | -1.139680 | 2.523129  | 0.114700  |

**TSIc-Ic**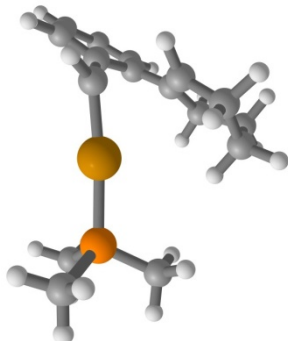 $\Delta E(\text{DCE})$  -1099.630768 h. $\Delta G(\text{DCE})$  -1099.680767 h.

|    |           |           |           |
|----|-----------|-----------|-----------|
| 79 | -0.754831 | -0.541457 | -0.393218 |
| 15 | -2.902196 | -0.338145 | 0.558958  |
| 6  | -3.399729 | 1.358686  | 1.005075  |
| 1  | -3.371947 | 2.003278  | 0.118898  |
| 1  | -4.417834 | 1.353602  | 1.416460  |
| 1  | -2.711613 | 1.762945  | 1.756667  |
| 6  | -4.245628 | -0.929325 | -0.522599 |
| 1  | -4.081892 | -1.982283 | -0.777911 |
| 1  | -5.212232 | -0.827250 | -0.011733 |
| 1  | -4.263882 | -0.343143 | -1.448251 |
| 6  | -3.115254 | -1.281990 | 2.104134  |
| 1  | -2.399869 | -0.930163 | 2.856096  |
| 1  | -4.135733 | -1.149543 | 2.486702  |
| 1  | -2.933699 | -2.346730 | 1.919866  |
| 6  | 1.117878  | -0.910799 | -1.217362 |
| 1  | 1.129622  | -1.382183 | -2.211806 |
| 6  | 2.339048  | -1.035202 | -0.505397 |
| 6  | 3.121773  | -2.213401 | -0.566930 |
| 6  | 2.737673  | 0.029471  | 0.354481  |
| 6  | 4.127676  | -2.398269 | 0.357838  |
| 1  | 2.869128  | -2.993533 | -1.283843 |
| 6  | 3.755007  | -0.188502 | 1.299742  |
| 6  | 4.431018  | -1.394144 | 1.301164  |
| 1  | 4.696909  | -3.325862 | 0.361816  |
| 1  | 4.049651  | 0.603322  | 1.986206  |
| 1  | 5.239623  | -1.556340 | 2.011368  |
| 6  | 2.071225  | 1.268453  | 0.086631  |
| 6  | 1.522650  | 1.433204  | -1.171081 |
| 6  | 1.876269  | 2.301362  | 1.158885  |
| 6  | 0.599991  | 2.554845  | -1.523636 |
| 1  | 1.981079  | 0.912775  | -2.017000 |
| 6  | 1.265551  | 3.597907  | 0.638907  |
| 1  | 1.226034  | 1.861731  | 1.936656  |
| 1  | 2.836826  | 2.496837  | 1.658268  |
| 6  | 0.099258  | 3.302330  | -0.295033 |
| 1  | -0.231520 | 2.168486  | -2.131383 |
| 1  | 1.148050  | 3.244395  | -2.188980 |
| 1  | 0.947943  | 4.219054  | 1.485989  |
| 1  | 2.029758  | 4.173606  | 0.092042  |
| 1  | -0.406442 | 4.227355  | -0.600385 |
| 1  | -0.649850 | 2.689210  | 0.235186  |

**IIc**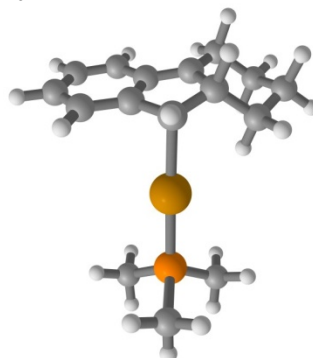 $\Delta E(\text{DCE})$  -1099.681796 h. $\Delta G(\text{DCE})$  -1099.733809 h.

|    |           |           |           |
|----|-----------|-----------|-----------|
| 6  | -3.310329 | 1.812726  | 1.109643  |
| 6  | -2.664272 | 0.866411  | 0.256883  |
| 6  | -1.622557 | 1.279605  | -0.655322 |
| 6  | -1.317248 | 2.658725  | -0.763881 |
| 6  | -1.982161 | 3.544733  | 0.045306  |
| 6  | -2.966992 | 3.128648  | 0.997441  |
| 1  | -4.069944 | 1.485807  | 1.818204  |
| 1  | -0.558570 | 2.998638  | -1.467966 |
| 1  | -1.754106 | 4.607141  | -0.029332 |
| 1  | -3.445629 | 3.879643  | 1.621992  |
| 6  | -1.071243 | 0.146300  | -1.334134 |
| 79 | 0.907863  | 0.035862  | -0.402496 |
| 15 | 3.058823  | -0.123405 | 0.530129  |

|   |           |           |           |
|---|-----------|-----------|-----------|
| 6 | 3.446598  | 1.145862  | 1.778869  |
| 1 | 2.729224  | 1.085829  | 2.604994  |
| 1 | 4.461179  | 0.990643  | 2.168995  |
| 1 | 3.380788  | 2.143095  | 1.329840  |
| 6 | 4.408291  | 0.011268  | -0.688126 |
| 1 | 5.379979  | -0.093474 | -0.187419 |
| 1 | 4.306184  | -0.773882 | -1.445649 |
| 1 | 4.363083  | 0.986038  | -1.186899 |
| 6 | 3.373250  | -1.704825 | 1.381426  |
| 1 | 4.393676  | -1.717269 | 1.786860  |
| 1 | 2.658162  | -1.835836 | 2.201350  |
| 1 | 3.254846  | -2.535912 | 0.677006  |
| 6 | -2.898735 | -0.480805 | 0.070625  |
| 6 | -3.861106 | -1.367687 | 0.760756  |
| 6 | -1.993445 | -1.013166 | -0.984398 |
| 6 | -3.204827 | -2.707822 | 1.128763  |
| 1 | -4.691095 | -1.568711 | 0.060073  |
| 1 | -4.303423 | -0.877983 | 1.637918  |
| 6 | -1.386861 | -2.362611 | -0.563717 |
| 1 | -2.635167 | -1.207389 | -1.868221 |
| 6 | -2.469818 | -3.309891 | -0.062251 |
| 1 | -3.976734 | -3.391113 | 1.504633  |
| 1 | -2.491984 | -2.548392 | 1.953303  |
| 1 | -0.829369 | -2.789917 | -1.407786 |
| 1 | -0.654187 | -2.185785 | 0.243081  |
| 1 | -2.019585 | -4.270775 | 0.220978  |
| 1 | -3.186533 | -3.522579 | -0.873294 |
| 1 | -0.785585 | 0.275349  | -2.384743 |

#### TSHc-IIIc

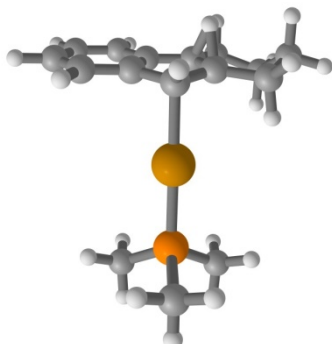

$\Delta E(\text{DCE})$  -1099.661586 h.

$\Delta G(\text{DCE})$  -1099.711975 h.

|    |           |           |           |
|----|-----------|-----------|-----------|
| 6  | -3.336591 | 1.819375  | 1.109565  |
| 6  | -2.635479 | 0.893623  | 0.322813  |
| 6  | -1.692269 | 1.307210  | -0.651563 |
| 6  | -1.491305 | 2.678081  | -0.871412 |
| 6  | -2.193016 | 3.585591  | -0.095235 |
| 6  | -3.101224 | 3.165783  | 0.899233  |
| 1  | -4.047881 | 1.484096  | 1.864267  |
| 1  | -0.783185 | 3.018867  | -1.626616 |
| 1  | -2.038150 | 4.652505  | -0.250545 |
| 1  | -3.624666 | 3.910838  | 1.495192  |
| 6  | -1.085996 | 0.136076  | -1.284585 |
| 79 | 0.910858  | 0.026559  | -0.397621 |
| 15 | 3.061971  | -0.065147 | 0.525889  |
| 6  | 3.459554  | 1.311814  | 1.651947  |
| 1  | 2.750146  | 1.327206  | 2.486871  |
| 1  | 4.477585  | 1.190862  | 2.045600  |
| 1  | 3.390118  | 2.265049  | 1.116087  |
| 6  | 4.406901  | -0.050192 | -0.703767 |
| 1  | 5.378603  | -0.108412 | -0.195551 |
| 1  | 4.302455  | -0.905885 | -1.379993 |
| 1  | 4.364245  | 0.870995  | -1.295385 |
| 6  | 3.375591  | -1.563593 | 1.515715  |
| 1  | 4.394322  | -1.534114 | 1.924496  |
| 1  | 2.657131  | -1.623973 | 2.340777  |
| 1  | 3.265101  | -2.455102 | 0.888232  |
| 6  | -2.713037 | -0.542704 | 0.287255  |
| 6  | -3.474757 | -1.460513 | 1.189315  |
| 6  | -1.820398 | -1.009663 | -0.744831 |
| 6  | -2.936524 | -2.890473 | 1.117364  |

|   |           |           |           |
|---|-----------|-----------|-----------|
| 1 | -4.544078 | -1.428350 | 0.928486  |
| 1 | -3.409684 | -1.062044 | 2.211663  |
| 6 | -1.564876 | -2.476841 | -0.950130 |
| 1 | -3.046415 | -0.817809 | -1.023124 |
| 6 | -2.671516 | -3.322968 | -0.321889 |
| 1 | -3.644890 | -3.572279 | 1.603333  |
| 1 | -1.995758 | -2.951560 | 1.687248  |
| 1 | -1.441640 | -2.694326 | -2.019741 |
| 1 | -0.603102 | -2.715736 | -0.470910 |
| 1 | -2.381921 | -4.380338 | -0.356151 |
| 1 | -3.597789 | -3.234804 | -0.913903 |
| 1 | -0.858247 | 0.159749  | -2.355360 |

#### IIIc

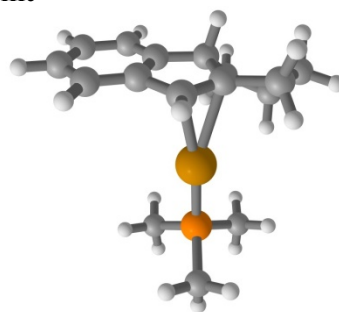

$\Delta E(\text{DCE})$  -1099.698196 h.

$\Delta G(\text{DCE})$  -1099.747897 h.

|    |           |           |           |
|----|-----------|-----------|-----------|
| 6  | 3.352272  | -0.989448 | 1.402504  |
| 6  | 2.638084  | -0.273532 | 0.453939  |
| 6  | 2.193880  | -0.898584 | -0.726711 |
| 6  | 2.481427  | -2.236204 | -0.981621 |
| 6  | 3.213448  | -2.947861 | -0.030350 |
| 6  | 3.637342  | -2.335193 | 1.151392  |
| 1  | 3.692755  | -0.514593 | 2.323170  |
| 1  | 2.139930  | -2.717677 | -1.897452 |
| 1  | 3.452191  | -3.995233 | -0.208527 |
| 1  | 4.200660  | -2.911731 | 1.883426  |
| 6  | 1.405135  | 0.078132  | -1.502304 |
| 79 | -0.643583 | -0.077148 | -0.460328 |
| 15 | -2.725672 | -0.632651 | 0.432094  |
| 6  | -2.675906 | -2.053119 | 1.568198  |
| 1  | -1.978708 | -1.849903 | 2.388385  |
| 1  | -3.677717 | -2.230884 | 1.980806  |
| 1  | -2.340277 | -2.948372 | 1.033512  |
| 6  | -3.980290 | -1.062683 | -0.812539 |
| 1  | -4.927582 | -1.300912 | -0.311158 |
| 1  | -4.134816 | -0.220591 | -1.495806 |
| 1  | -3.650603 | -1.931713 | -1.392060 |
| 6  | -3.462872 | 0.718765  | 1.404042  |
| 1  | -4.443989 | 0.405330  | 1.784739  |
| 1  | -2.811804 | 0.968252  | 2.249899  |
| 1  | -3.585318 | 1.609033  | 0.777146  |
| 6  | 2.218387  | 1.166962  | 0.436118  |
| 6  | 1.493486  | 1.756982  | 1.659523  |
| 6  | 1.413446  | 1.287557  | -0.828748 |
| 6  | 0.537017  | 2.893151  | 1.252910  |
| 1  | 2.242153  | 2.118637  | 2.377297  |
| 1  | 0.934554  | 0.956183  | 2.167308  |
| 6  | 0.963426  | 2.656991  | -1.229971 |
| 1  | 3.115598  | 1.787851  | 0.242622  |
| 6  | 0.986359  | 3.605424  | -0.021384 |
| 1  | 0.437918  | 3.611800  | 2.076384  |
| 1  | -0.472754 | 2.480389  | 1.083009  |
| 1  | 1.635349  | 3.029436  | -2.019711 |
| 1  | -0.037391 | 2.618440  | -1.682520 |
| 1  | 0.344567  | 4.471414  | -0.225473 |
| 1  | 2.002917  | 4.004876  | 0.121269  |
| 1  | 1.102681  | -0.059604 | -2.541784 |

#### TSHc-II'c



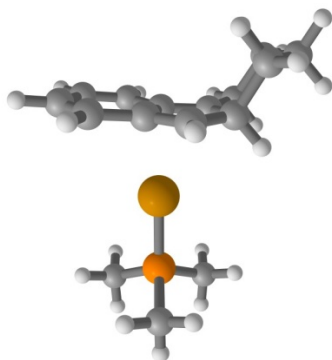

$\Delta E(\text{DCE})$  -1099.656383 h.  
 $\Delta G(\text{DCE})$  -1099.706059 h.

|    |           |           |           |
|----|-----------|-----------|-----------|
| 79 | -0.761290 | 0.076063  | 0.097794  |
| 15 | -2.905476 | -0.737632 | -0.109707 |
| 6  | -2.969638 | -2.362187 | -0.924888 |
| 1  | -2.404981 | -3.096170 | -0.339714 |
| 1  | -4.013287 | -2.692730 | -1.011214 |
| 1  | -2.527891 | -2.292647 | -1.924951 |
| 6  | -3.763340 | -0.958488 | 1.478360  |
| 1  | -3.851073 | 0.005931  | 1.990783  |
| 1  | -4.766623 | -1.368186 | 1.302095  |
| 1  | -3.198240 | -1.647040 | 2.115719  |
| 6  | -3.990674 | 0.337013  | -1.095817 |
| 1  | -3.577317 | 0.462664  | -2.102427 |
| 1  | -4.987678 | -0.117830 | -1.166696 |
| 1  | -4.075238 | 1.321208  | -0.622790 |
| 6  | 1.568328  | 0.223066  | 1.773719  |
| 1  | 1.481607  | 0.234928  | 2.856791  |
| 6  | 1.290357  | 1.264050  | 0.920955  |
| 6  | 0.868295  | 2.627592  | 1.154582  |
| 6  | 1.575780  | 0.832003  | -0.476658 |
| 6  | 0.782484  | 3.479738  | 0.102250  |
| 1  | 0.646324  | 2.952767  | 2.169990  |
| 6  | 1.460058  | 1.794794  | -1.548537 |
| 6  | 1.084815  | 3.065034  | -1.254399 |
| 1  | 0.481406  | 4.512785  | 0.268468  |
| 1  | 1.684482  | 1.496152  | -2.571875 |
| 1  | 1.002162  | 3.804241  | -2.049146 |
| 6  | 2.021115  | -0.472076 | -0.450372 |
| 6  | 2.125660  | -0.909458 | 0.979132  |
| 6  | 2.605099  | -1.313420 | -1.523250 |
| 6  | 3.634057  | -1.147223 | 1.264728  |
| 1  | 1.603030  | -1.864224 | 1.162052  |
| 6  | 4.079864  | -1.593733 | -1.178128 |
| 1  | 2.069568  | -2.275780 | -1.579992 |
| 1  | 2.516439  | -0.835617 | -2.507940 |
| 6  | 4.224062  | -2.116711 | 0.245609  |
| 1  | 3.751417  | -1.519298 | 2.290932  |
| 1  | 4.154759  | -0.177122 | 1.206482  |
| 1  | 4.494959  | -2.309257 | -1.900395 |
| 1  | 4.654088  | -0.659178 | -1.283123 |
| 1  | 5.284901  | -2.284577 | 0.477703  |
| 1  | 3.723295  | -3.095456 | 0.335386  |

$\Pi^{\prime}c$

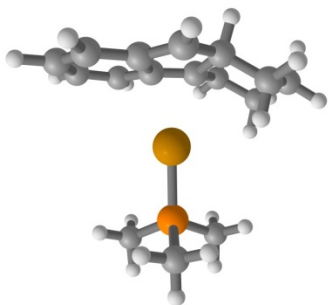

$\Delta E(\text{DCE})$  -1099.669195 h.  
 $\Delta G(\text{DCE})$  -1099.719148 h.

|   |           |           |           |
|---|-----------|-----------|-----------|
| 6 | -1.725306 | -1.634569 | -1.493001 |
|---|-----------|-----------|-----------|

|    |           |           |           |
|----|-----------|-----------|-----------|
| 6  | -1.854904 | -0.629051 | -0.461545 |
| 6  | -2.294057 | -1.039441 | 0.894951  |
| 6  | -2.424790 | -2.442143 | 1.188621  |
| 6  | -2.234146 | -3.347993 | 0.195106  |
| 6  | -1.909506 | -2.937542 | -1.154650 |
| 1  | -1.482734 | -1.338783 | -2.513193 |
| 1  | -2.694386 | -2.755330 | 2.196390  |
| 1  | -2.343162 | -4.411759 | 0.398302  |
| 1  | -1.816693 | -3.707914 | -1.918609 |
| 6  | -2.515995 | 0.071847  | 1.648329  |
| 79 | 0.443758  | -0.112336 | -0.118608 |
| 15 | 2.748010  | -0.201077 | 0.202724  |
| 6  | 3.568444  | -1.567005 | -0.675298 |
| 1  | 3.384345  | -1.482273 | -1.751811 |
| 1  | 4.649607  | -1.528985 | -0.488068 |
| 1  | 3.173346  | -2.526078 | -0.322876 |
| 6  | 3.244391  | -0.386081 | 1.942997  |
| 1  | 4.339764  | -0.399484 | 2.014859  |
| 1  | 2.853967  | 0.449667  | 2.534074  |
| 1  | 2.844320  | -1.322414 | 2.347117  |
| 6  | 3.582387  | 1.308960  | -0.375333 |
| 1  | 4.663811  | 1.226614  | -0.203426 |
| 1  | 3.396054  | 1.449355  | -1.446089 |
| 1  | 3.194104  | 2.179367  | 0.165963  |
| 6  | -1.779781 | 0.766274  | -0.499941 |
| 6  | -1.597144 | 1.745932  | -1.613953 |
| 6  | -2.307691 | 1.283221  | 0.807003  |
| 6  | -0.832410 | 2.973646  | -1.095053 |
| 1  | -2.592034 | 2.065716  | -1.971292 |
| 1  | -1.086093 | 1.292654  | -2.474846 |
| 6  | -1.522252 | 2.490725  | 1.318019  |
| 1  | -3.327879 | 1.649934  | 0.555801  |
| 6  | -1.429996 | 3.529880  | 0.197949  |
| 1  | -0.820843 | 3.753573  | -1.868254 |
| 1  | 0.221085  | 2.692987  | -0.916678 |
| 1  | -2.010094 | 2.917523  | 2.204746  |
| 1  | -0.514371 | 2.166698  | 1.627494  |
| 1  | -0.835926 | 4.389448  | 0.536970  |
| 1  | -2.442751 | 3.915047  | -0.010385 |
| 1  | -2.833973 | 0.095169  | 2.687757  |

$\text{TSII}^{\prime}c\text{-III}^{\prime}c$

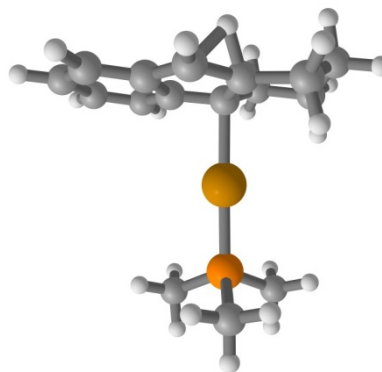

$\Delta E(\text{DCE})$  -1099.652190 h.  
 $\Delta G(\text{DCE})$  -1099.701280 h.

|    |           |           |           |
|----|-----------|-----------|-----------|
| 6  | -2.116409 | -1.632213 | -1.447622 |
| 6  | -2.028552 | -0.677825 | -0.416220 |
| 6  | -2.562481 | -0.991643 | 0.871675  |
| 6  | -3.112967 | -2.259262 | 1.145951  |
| 6  | -3.147379 | -3.190789 | 0.130846  |
| 6  | -2.665171 | -2.867086 | -1.160463 |
| 1  | -1.745872 | -1.403290 | -2.446897 |
| 1  | -3.502465 | -2.488356 | 2.136859  |
| 1  | -3.563149 | -4.180191 | 0.310919  |
| 1  | -2.733675 | -3.616726 | -1.947685 |
| 6  | -2.465500 | 0.170251  | 1.682400  |
| 79 | 0.629786  | 0.078319  | -0.086906 |
| 15 | 2.876302  | -0.513550 | 0.161383  |
| 6  | 3.295675  | -2.163013 | -0.489244 |
| 1  | 3.074475  | -2.208916 | -1.561280 |
| 1  | 4.363982  | -2.363064 | -0.331191 |

|   |           |           |           |
|---|-----------|-----------|-----------|
| 1 | 2.705313  | -2.929323 | 0.025129  |
| 6 | 3.443556  | -0.549388 | 1.892209  |
| 1 | 4.504372  | -0.830344 | 1.929934  |
| 1 | 3.315020  | 0.438541  | 2.348289  |
| 1 | 2.856850  | -1.279075 | 2.461243  |
| 6 | 4.033388  | 0.615289  | -0.678610 |
| 1 | 5.064513  | 0.267080  | -0.533119 |
| 1 | 3.811986  | 0.647205  | -1.751193 |
| 1 | 3.932898  | 1.626439  | -0.268598 |
| 6 | -1.503668 | 0.676207  | -0.411356 |
| 6 | -1.537397 | 1.635950  | -1.587426 |
| 6 | -1.889572 | 1.230160  | 0.890607  |
| 6 | -0.976176 | 2.998068  | -1.174117 |
| 1 | -2.583476 | 1.757619  | -1.923787 |
| 1 | -0.980569 | 1.237699  | -2.447444 |
| 6 | -1.473057 | 2.618121  | 1.295242  |
| 1 | -3.123387 | 1.206594  | 0.926278  |
| 6 | -1.642058 | 3.546168  | 0.089004  |
| 1 | -1.105460 | 3.714374  | -1.996746 |
| 1 | 0.110368  | 2.906364  | -1.002823 |
| 1 | -2.063933 | 2.967205  | 2.152414  |
| 1 | -0.422547 | 2.595317  | 1.620787  |
| 1 | -1.239258 | 4.538977  | 0.328389  |
| 1 | -2.719697 | 3.682539  | -0.104453 |
| 1 | -2.767351 | 0.275410  | 2.722570  |

### III'c

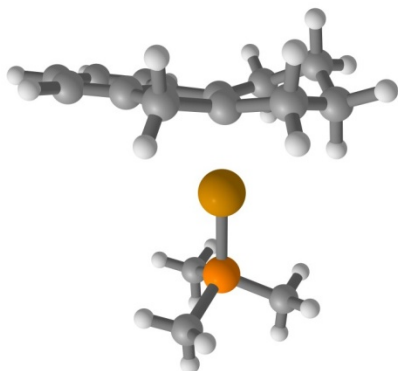

$\Delta E(\text{DCE}) -1099.708955 \text{ h.}$   
 $\Delta G(\text{DCE}) -1099.759893 \text{ h.}$

|    |           |           |           |
|----|-----------|-----------|-----------|
| 79 | 0.638511  | 0.116987  | 0.083808  |
| 15 | 2.771836  | -0.806062 | -0.092866 |
| 6  | 4.052900  | 0.418744  | -0.501912 |
| 1  | 4.103060  | 1.184387  | 0.280076  |
| 1  | 5.027860  | -0.079359 | -0.583705 |
| 1  | 3.814283  | 0.903287  | -1.455061 |
| 6  | 3.355035  | -1.616434 | 1.427764  |
| 1  | 2.678077  | -2.434030 | 1.698451  |
| 1  | 4.363725  | -2.019519 | 1.266989  |
| 1  | 3.382474  | -0.893476 | 2.250203  |
| 6  | 2.898146  | -2.076619 | -1.389979 |
| 1  | 2.634790  | -1.644855 | -2.361799 |
| 1  | 3.925451  | -2.461837 | -1.432073 |
| 1  | 2.211447  | -2.901741 | -1.172045 |
| 6  | -1.946063 | 0.182869  | 1.823159  |
| 1  | -2.746266 | 0.677515  | 2.398547  |
| 6  | -2.498636 | -0.865351 | 0.899386  |
| 6  | -3.137982 | -2.063600 | 1.179777  |
| 6  | -2.286184 | -0.472336 | -0.435224 |
| 6  | -3.574093 | -2.856856 | 0.114210  |
| 1  | -3.307667 | -2.379704 | 2.208811  |
| 6  | -2.717867 | -1.260467 | -1.498555 |
| 6  | -3.369024 | -2.459414 | -1.209576 |
| 1  | -4.085523 | -3.796292 | 0.318546  |
| 1  | -2.550606 | -0.951532 | -2.530436 |
| 1  | -3.719610 | -3.093300 | -2.022365 |
| 6  | -1.585559 | 0.820931  | -0.436470 |
| 6  | -1.334119 | 1.192587  | 0.879267  |
| 6  | -1.469135 | 1.761927  | -1.604924 |
| 6  | -0.935309 | 2.582107  | 1.268343  |
| 1  | -1.241206 | -0.213698 | 2.568811  |

|   |           |          |           |
|---|-----------|----------|-----------|
| 6 | -1.388176 | 3.213523 | -1.125508 |
| 1 | -0.599961 | 1.506744 | -2.231460 |
| 1 | -2.348367 | 1.621224 | -2.251194 |
| 6 | -0.444577 | 3.380775 | 0.062296  |
| 1 | -0.184522 | 2.566094 | 2.072092  |
| 1 | -1.826042 | 3.071015 | 1.701874  |
| 1 | -1.082571 | 3.860605 | -1.957384 |
| 1 | -2.395206 | 3.543740 | -0.823147 |
| 1 | -0.359888 | 4.440804 | 0.334243  |
| 1 | 0.570222  | 3.048610 | -0.218103 |

### Icc

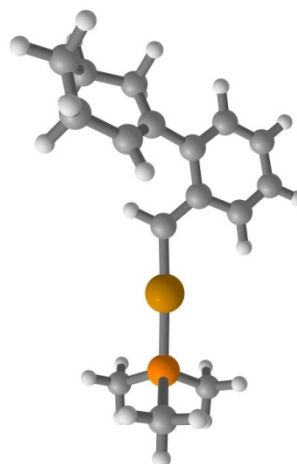

$\Delta E(\text{DCE}) -1099.634469 \text{ h.}$   
 $\Delta G(\text{DCE}) -1099.686582 \text{ h.}$

|    |           |           |           |
|----|-----------|-----------|-----------|
| 79 | 1.404926  | -0.106003 | -0.117392 |
| 15 | 3.758637  | -0.398988 | 0.033157  |
| 6  | 4.315174  | -1.170524 | 1.589383  |
| 1  | 3.851590  | -2.157404 | 1.700417  |
| 1  | 5.407258  | -1.284512 | 1.581922  |
| 1  | 4.023433  | -0.548526 | 2.443067  |
| 6  | 4.462257  | -1.469678 | -1.264780 |
| 1  | 4.261911  | -1.042504 | -2.253707 |
| 1  | 5.547195  | -1.564639 | -1.125712 |
| 1  | 4.004591  | -2.463981 | -1.213039 |
| 6  | 4.730222  | 1.140702  | -0.078968 |
| 1  | 4.446684  | 1.821568  | 0.731433  |
| 1  | 5.802155  | 0.915812  | -0.002146 |
| 1  | 4.534814  | 1.635231  | -1.037175 |
| 6  | -0.633066 | 0.078310  | -0.270489 |
| 1  | -1.174845 | -0.748584 | -0.743320 |
| 6  | -1.452918 | 1.153960  | 0.081106  |
| 6  | -0.841027 | 2.425459  | 0.308610  |
| 6  | -2.895030 | 1.074558  | 0.024738  |
| 6  | -1.586591 | 3.578974  | 0.320527  |
| 1  | 0.244055  | 2.456730  | 0.404542  |
| 6  | -3.619361 | 2.271741  | -0.006820 |
| 6  | -2.979048 | 3.494413  | 0.141498  |
| 1  | -1.111543 | 4.547618  | 0.456460  |
| 1  | -4.703939 | 2.245780  | -0.090284 |
| 1  | -3.574892 | 4.405718  | 0.149050  |
| 6  | -3.585112 | -0.205585 | 0.046505  |
| 6  | -3.096350 | -1.228748 | 0.790768  |
| 6  | -4.886281 | -0.345668 | -0.709636 |
| 6  | -3.736212 | -2.571721 | 0.897474  |
| 1  | -2.205847 | -1.061986 | 1.400757  |
| 6  | -5.245085 | -1.807418 | -0.947026 |
| 1  | -5.697902 | 0.141134  | -0.142411 |
| 1  | -4.818842 | 0.195589  | -1.664616 |
| 6  | -5.160961 | -2.592835 | 0.353450  |
| 1  | -3.704249 | -2.910062 | 1.943156  |
| 1  | -3.108548 | -3.292522 | 0.343405  |
| 1  | -6.250725 | -1.874897 | -1.382502 |
| 1  | -4.549895 | -2.241252 | -1.684507 |
| 1  | -5.492565 | -3.629595 | 0.211288  |
| 1  | -5.842236 | -2.141298 | 1.092531  |

**TSIcc-IIcc**

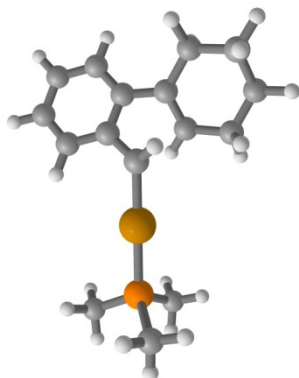

$\Delta E(\text{DCE})$  -1099.626766  
 $\Delta G(\text{DCE})$  -1099.678063

|    |           |           |           |
|----|-----------|-----------|-----------|
| 79 | 1.189266  | 0.012627  | -0.209453 |
| 15 | 3.517940  | -0.216542 | 0.182813  |
| 6  | 3.955713  | -1.359918 | 1.535487  |
| 1  | 3.575434  | -2.363775 | 1.315842  |
| 1  | 5.046836  | -1.404238 | 1.650030  |
| 1  | 3.509962  | -1.014240 | 2.475007  |
| 6  | 4.457815  | -0.837344 | -1.251554 |
| 1  | 4.339374  | -0.150806 | -2.097379 |
| 1  | 5.523417  | -0.918244 | -0.999681 |
| 1  | 4.080966  | -1.823243 | -1.546717 |
| 6  | 4.363182  | 1.336581  | 0.632458  |
| 1  | 3.935317  | 1.737989  | 1.558118  |
| 1  | 5.434970  | 1.150320  | 0.782571  |
| 1  | 4.234342  | 2.079356  | -0.162840 |
| 6  | -0.830582 | 0.210803  | -0.587761 |
| 1  | -1.240718 | -0.386593 | -1.406951 |
| 6  | -1.672622 | 1.301041  | -0.180310 |
| 6  | -1.232273 | 2.635727  | -0.088326 |
| 6  | -3.029753 | 0.992825  | 0.112743  |
| 6  | -2.162799 | 3.636710  | 0.118447  |
| 1  | -0.180867 | 2.868667  | -0.252836 |
| 6  | -3.967011 | 2.022738  | 0.301498  |
| 6  | -3.526713 | 3.333021  | 0.301390  |
| 1  | -1.842099 | 4.676681  | 0.133516  |
| 1  | -5.013205 | 1.790491  | 0.496574  |
| 1  | -4.235202 | 4.140568  | 0.475184  |
| 6  | -3.259681 | -0.416284 | 0.226057  |
| 6  | -2.147337 | -1.186828 | 0.526616  |
| 6  | -4.591425 | -1.043972 | -0.055871 |
| 6  | -2.105095 | -2.673293 | 0.336144  |
| 1  | -1.393309 | -0.759645 | 1.193186  |
| 6  | -4.446168 | -2.482771 | -0.547906 |
| 1  | -5.176483 | -1.031386 | 0.880387  |
| 1  | -5.155466 | -0.435612 | -0.775522 |
| 6  | -3.509292 | -3.277089 | 0.350234  |
| 1  | -1.466636 | -3.134514 | 1.100065  |
| 1  | -1.623831 | -2.891511 | -0.633335 |
| 1  | -5.436783 | -2.952684 | -0.593720 |
| 1  | -4.050867 | -2.477217 | -1.576340 |
| 1  | -3.462853 | -4.326790 | 0.032786  |
| 1  | -3.899144 | -3.274614 | 1.380562  |

**Icc**

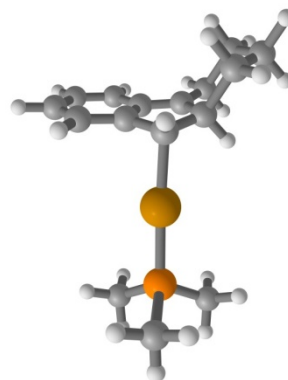

$\Delta E(\text{DCE})$  -1099.681479 h.  
 $\Delta G(\text{DCE})$  -1099.732543 h.

|    |           |           |           |
|----|-----------|-----------|-----------|
| 79 | 1.049271  | -0.123879 | -0.309115 |
| 15 | 3.277323  | -0.223960 | 0.434130  |
| 6  | 3.623312  | -1.658349 | 1.505438  |
| 1  | 3.398214  | -2.586629 | 0.968247  |
| 1  | 4.680684  | -1.660186 | 1.802223  |
| 1  | 2.997045  | -1.613074 | 2.403502  |
| 6  | 4.497729  | -0.365907 | -0.913344 |
| 1  | 4.443066  | 0.516632  | -1.560375 |
| 1  | 5.510203  | -0.444415 | -0.495475 |
| 1  | 4.286091  | -1.256152 | -1.516264 |
| 6  | 3.845080  | 1.209590  | 1.406057  |
| 1  | 3.216446  | 1.331702  | 2.295173  |
| 1  | 4.886827  | 1.058043  | 1.718703  |
| 1  | 3.779442  | 2.120983  | 0.801416  |
| 6  | -1.003828 | -0.136616 | -1.040315 |
| 1  | -0.848396 | -0.292076 | -2.115037 |
| 6  | -1.500093 | 1.138243  | -0.618192 |
| 6  | -1.241204 | 2.439638  | -1.112752 |
| 6  | -2.432637 | 0.981561  | 0.475363  |
| 6  | -1.850837 | 3.508000  | -0.504211 |
| 1  | -0.560938 | 2.581027  | -1.951634 |
| 6  | -3.027185 | 2.118657  | 1.102093  |
| 6  | -2.731849 | 3.358267  | 0.613404  |
| 1  | -1.659440 | 4.512820  | -0.878527 |
| 1  | -3.704359 | 1.990646  | 1.945247  |
| 1  | -3.169150 | 4.247874  | 1.061427  |
| 6  | -2.643553 | -0.367959 | 0.678740  |
| 6  | -1.846786 | -1.156510 | -0.292083 |
| 6  | -3.614935 | -1.055876 | 1.551885  |
| 6  | -2.844247 | -1.931989 | -1.189390 |
| 1  | -1.251121 | -1.914587 | 0.249417  |
| 6  | -4.573933 | -1.861783 | 0.645521  |
| 1  | -3.081246 | -1.760011 | 2.210456  |
| 1  | -4.167187 | -0.355558 | 2.190353  |
| 6  | -3.808443 | -2.743658 | -0.332649 |
| 1  | -2.277796 | -2.572167 | -1.878535 |
| 1  | -3.397709 | -1.201304 | -1.802595 |
| 1  | -5.239971 | -2.461678 | 1.278627  |
| 1  | -5.209739 | -1.156617 | 0.087331  |
| 1  | -4.515555 | -3.278140 | -0.981710 |
| 1  | -3.247251 | -3.513147 | 0.222760  |

**TSIIcc-IIIcc**

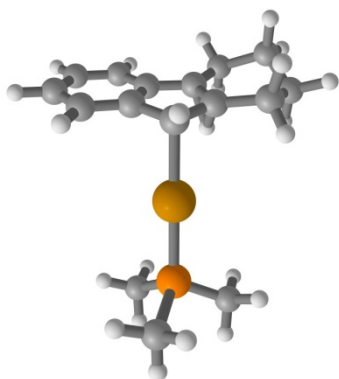

$\Delta E(\text{DCE})$  -1099.658625 h.

$\Delta G(\text{DCE})$  -1099.709429 h.

|    |           |           |           |
|----|-----------|-----------|-----------|
| 79 | 0.972086  | -0.013215 | -0.354132 |
| 15 | 3.158747  | -0.123360 | 0.491014  |
| 6  | 3.623116  | -1.773869 | 1.110256  |
| 1  | 3.511741  | -2.517837 | 0.313315  |
| 1  | 4.665800  | -1.766000 | 1.454274  |
| 1  | 2.971184  | -2.054330 | 1.945221  |
| 6  | 4.450284  | 0.282407  | -0.728727 |
| 1  | 4.305496  | 1.301286  | -1.104552 |
| 1  | 5.440936  | 0.207090  | -0.261191 |
| 1  | 4.396952  | -0.413056 | -1.573630 |
| 6  | 3.490428  | 0.994077  | 1.892410  |
| 1  | 2.826014  | 0.749571  | 2.728707  |
| 1  | 4.534173  | 0.886551  | 2.216610  |
| 1  | 3.310080  | 2.032930  | 1.594249  |
| 6  | -1.055751 | 0.085957  | -1.160482 |
| 1  | -0.832408 | -0.008290 | -2.228574 |
| 6  | -1.665459 | 1.306339  | -0.633506 |
| 6  | -1.402074 | 2.657734  | -0.904411 |
| 6  | -2.644080 | 0.971703  | 0.337115  |
| 6  | -2.116259 | 3.626099  | -0.218730 |
| 1  | -0.650422 | 2.935633  | -1.643154 |
| 6  | -3.338439 | 1.959514  | 1.050682  |
| 6  | -3.074490 | 3.285357  | 0.757950  |
| 1  | -1.932363 | 4.677992  | -0.433518 |
| 1  | -4.077616 | 1.688513  | 1.804034  |
| 1  | -3.609074 | 4.075747  | 1.281503  |
| 6  | -2.763853 | -0.464581 | 0.382635  |
| 6  | -1.814443 | -1.007362 | -0.552816 |
| 6  | -3.762139 | -1.308915 | 1.116279  |
| 6  | -1.838613 | -2.449403 | -0.949005 |
| 1  | -1.541743 | -0.936597 | 0.712401  |
| 6  | -3.921803 | -2.676722 | 0.449423  |
| 1  | -3.467484 | -1.417701 | 2.171288  |
| 1  | -4.716153 | -0.764459 | 1.129061  |
| 6  | -2.574861 | -3.297228 | 0.087652  |
| 1  | -0.819108 | -2.815234 | -1.128941 |
| 1  | -2.365633 | -2.500596 | -1.915768 |
| 1  | -4.488029 | -3.342633 | 1.112004  |
| 1  | -4.518925 | -2.562659 | -0.469199 |
| 1  | -2.715254 | -4.310854 | -0.306941 |
| 1  | -1.953581 | -3.397321 | 0.993689  |

**IIIcc**

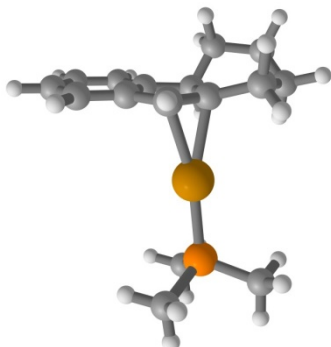

$\Delta E(\text{DCE})$  -1099.697981 h.

$\Delta G(\text{DCE})$  -1099.749134 h.

|    |           |           |           |
|----|-----------|-----------|-----------|
| 79 | -0.820562 | 0.039920  | -0.317320 |
| 15 | -3.010205 | -0.280175 | 0.437248  |
| 6  | -4.017781 | 1.235380  | 0.409110  |
| 1  | -4.064457 | 1.634748  | -0.609895 |
| 1  | -5.034582 | 1.007846  | 0.755609  |
| 1  | -3.573926 | 1.992171  | 1.065236  |
| 6  | -3.939776 | -1.483953 | -0.562553 |
| 1  | -3.433208 | -2.454885 | -0.544467 |
| 1  | -4.953140 | -1.597044 | -0.155389 |
| 1  | -4.003363 | -1.138064 | -1.600051 |
| 6  | -3.126596 | -0.893407 | 2.146516  |
| 1  | -2.654023 | -0.182870 | 2.833467  |
| 1  | -4.182795 | -1.013168 | 2.421461  |
| 1  | -2.618733 | -1.860218 | 2.233501  |
| 6  | 1.238646  | -0.144262 | -1.385900 |
| 1  | 0.920272  | -0.178053 | -2.428886 |
| 6  | 1.953022  | -1.233579 | -0.705800 |
| 6  | 2.135881  | -2.564322 | -1.072885 |
| 6  | 2.505564  | -0.724827 | 0.484059  |
| 6  | 2.890397  | -3.382976 | -0.233277 |
| 1  | 1.706842  | -2.954626 | -1.995190 |
| 6  | 3.242931  | -1.548134 | 1.322472  |
| 6  | 3.437231  | -2.881412 | 0.951286  |
| 1  | 3.057622  | -4.424548 | -0.502844 |
| 1  | 3.672444  | -1.164325 | 2.248361  |
| 1  | 4.027370  | -3.536955 | 1.589834  |
| 6  | 2.150886  | 0.725527  | 0.625429  |
| 6  | 1.348959  | 1.011646  | -0.630465 |
| 6  | 3.320576  | 1.718999  | 0.643414  |
| 6  | 1.186034  | 2.443665  | -1.053246 |
| 1  | 1.545695  | 0.894374  | 1.535151  |
| 6  | 2.809325  | 3.164738  | 0.755643  |
| 1  | 4.000900  | 1.476364  | 1.470190  |
| 1  | 3.896798  | 1.578324  | -0.285044 |
| 6  | 1.412867  | 3.362684  | 0.142576  |
| 1  | 0.213221  | 2.623834  | -1.528860 |
| 1  | 1.944274  | 2.647396  | -1.829586 |
| 1  | 2.781056  | 3.466742  | 1.811832  |
| 1  | 3.528920  | 3.834429  | 0.264645  |
| 1  | 1.274557  | 4.409686  | -0.154007 |
| 1  | 0.636778  | 3.153230  | 0.896196  |

**TSIIcc-II'cc**

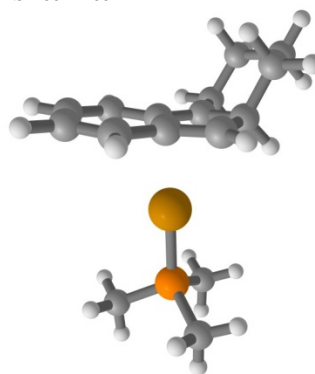

$\Delta E(\text{DCE})$  -1099.656383 h.

$\Delta G(\text{DCE})$  -1099.706059 h.

|    |           |           |           |
|----|-----------|-----------|-----------|
| 79 | -0.761290 | 0.076063  | 0.097794  |
| 15 | -2.905476 | -0.737632 | -0.109707 |
| 6  | -2.969638 | -2.362187 | -0.924888 |
| 1  | -2.404981 | -3.096170 | -0.339714 |
| 1  | -4.013287 | -2.692730 | -1.011214 |
| 1  | -2.527891 | -2.292647 | -1.924951 |
| 6  | -3.763340 | -0.958488 | 1.478360  |
| 1  | -3.851073 | 0.005931  | 1.990783  |
| 1  | -4.766623 | -1.368186 | 1.302095  |
| 1  | -3.198240 | -1.647040 | 2.115719  |
| 6  | -3.990674 | 0.337013  | -1.095817 |
| 1  | -3.577317 | 0.462664  | -2.102427 |
| 1  | -4.987678 | -0.117830 | -1.166696 |
| 1  | -4.075238 | 1.321208  | -0.622790 |

|   |          |           |           |
|---|----------|-----------|-----------|
| 6 | 1.568328 | 0.223066  | 1.773719  |
| 1 | 1.481607 | 0.234928  | 2.856791  |
| 1 | 1.290357 | 1.264050  | 0.920955  |
| 6 | 0.868295 | 2.627592  | 1.154582  |
| 6 | 1.575780 | 0.832003  | -0.476658 |
| 6 | 0.782484 | 3.479738  | 0.102250  |
| 1 | 0.646324 | 2.952767  | 2.169990  |
| 6 | 1.460058 | 1.794794  | -1.548537 |
| 6 | 1.084815 | 3.065034  | -1.254399 |
| 1 | 0.481406 | 4.512785  | 0.268468  |
| 1 | 1.684482 | 1.496152  | -2.571875 |
| 1 | 1.002162 | 3.804241  | -2.049146 |
| 6 | 2.021115 | -0.472076 | -0.450372 |
| 6 | 2.125660 | -0.909458 | 0.979132  |
| 6 | 2.605099 | -1.313420 | -1.523250 |
| 6 | 3.634057 | -1.147223 | 1.264728  |
| 1 | 1.603030 | -1.864224 | 1.162052  |
| 6 | 4.079864 | -1.593733 | -1.178128 |
| 1 | 2.069568 | -2.275780 | -1.579992 |
| 1 | 2.516439 | -0.835617 | -2.507940 |
| 6 | 4.224062 | -2.116711 | 0.245609  |
| 1 | 3.751417 | -1.519298 | 2.290932  |
| 1 | 4.154759 | -0.177122 | 1.206482  |
| 1 | 4.494959 | -2.309257 | -1.900395 |
| 1 | 4.654088 | -0.659178 | -1.283123 |
| 1 | 5.284901 | -2.284577 | 0.477703  |
| 1 | 3.723295 | -3.095456 | 0.335386  |

### II<sup>cc</sup>

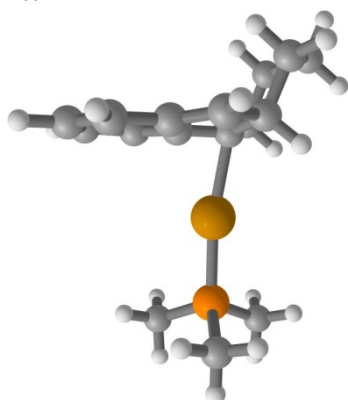

$\Delta E(\text{DCE})$  -1099.671281 h.  
 $\Delta G(\text{DCE})$  -1099.721874 h.

|    |           |           |           |
|----|-----------|-----------|-----------|
| 79 | -0.690379 | -0.206677 | -0.065823 |
| 15 | -3.017030 | -0.237511 | 0.129651  |
| 6  | -3.752584 | -1.880327 | -0.143054 |
| 1  | -3.355487 | -2.592489 | 0.588940  |
| 1  | -4.843700 | -1.820686 | -0.033769 |
| 1  | -3.509857 | -2.238191 | -1.149570 |
| 6  | -3.615485 | 0.271964  | 1.771670  |
| 1  | -3.285419 | 1.293340  | 1.990833  |
| 1  | -4.712493 | 0.232891  | 1.793936  |
| 1  | -3.214762 | -0.400236 | 2.538356  |
| 6  | -3.869727 | 0.861507  | -1.044925 |
| 1  | -3.621133 | 0.576593  | -2.073267 |
| 1  | -4.955459 | 0.785286  | -0.900627 |
| 1  | -3.555661 | 1.898096  | -0.880359 |
| 6  | 2.165134  | 0.533374  | 1.832193  |
| 1  | 2.427939  | 0.698966  | 2.874784  |
| 6  | 1.878982  | 1.496400  | 0.912684  |
| 6  | 1.868592  | 2.930252  | 1.005020  |
| 6  | 1.567181  | 0.847485  | -0.369762 |
| 6  | 1.659706  | 3.659217  | -0.122215 |
| 1  | 2.043506  | 3.408607  | 1.967621  |
| 6  | 1.404250  | 1.665186  | -1.539562 |
| 6  | 1.455183  | 3.018780  | -1.399876 |
| 1  | 1.659646  | 4.746544  | -0.080874 |
| 1  | 1.238069  | 1.204316  | -2.512750 |
| 1  | 1.338360  | 3.650905  | -2.278853 |
| 6  | 1.569124  | -0.551425 | -0.199051 |
| 6  | 2.103933  | -0.808067 | 1.198458  |

|   |          |           |           |
|---|----------|-----------|-----------|
| 6 | 1.750402 | -1.594885 | -1.269055 |
| 6 | 3.542261 | -1.395273 | 1.089973  |
| 1 | 1.488259 | -1.521825 | 1.773220  |
| 6 | 3.198676 | -2.097468 | -1.287170 |
| 1 | 1.094220 | -2.457141 | -1.067440 |
| 1 | 1.455044 | -1.198858 | -2.251092 |
| 6 | 3.615534 | -2.551780 | 0.103293  |
| 1 | 3.879960 | -1.690064 | 2.092218  |
| 1 | 4.213574 | -0.591416 | 0.746864  |
| 1 | 3.290673 | -2.915968 | -2.013832 |
| 1 | 3.865661 | -1.286960 | -1.625533 |
| 1 | 4.642249 | -2.943075 | 0.088072  |
| 1 | 2.965204 | -3.378141 | 0.436619  |

### TSII<sup>cc</sup>-III<sup>c</sup>

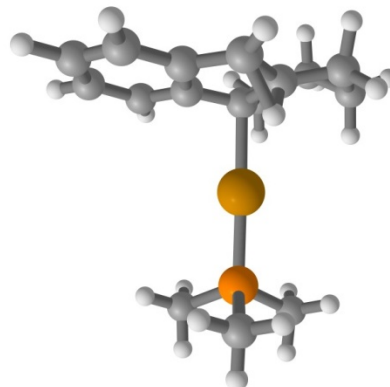

$\Delta E(\text{DCE})$  -1099.645262 h.  
 $\Delta G(\text{DCE})$  -1099.695360 h.

|    |           |           |           |
|----|-----------|-----------|-----------|
| 79 | 0.661271  | 0.113649  | -0.082650 |
| 15 | 2.918695  | -0.438706 | 0.134329  |
| 6  | 4.058847  | 0.955447  | -0.137021 |
| 1  | 3.872474  | 1.740140  | 0.604699  |
| 1  | 5.096421  | 0.608069  | -0.042564 |
| 1  | 3.908712  | 1.374393  | -1.138110 |
| 6  | 3.367061  | -1.083869 | 1.777178  |
| 1  | 2.778677  | -1.980058 | 2.002884  |
| 1  | 4.435111  | -1.338120 | 1.794791  |
| 1  | 3.164724  | -0.326999 | 2.543148  |
| 6  | 3.470577  | -1.721603 | -1.034427 |
| 1  | 3.328035  | -1.374583 | -2.063839 |
| 1  | 4.534005  | -1.939838 | -0.869701 |
| 1  | 2.887591  | -2.637537 | -0.888038 |
| 6  | -2.485766 | 0.099144  | 1.704229  |
| 1  | -2.829781 | 0.209493  | 2.730133  |
| 6  | -2.557408 | -1.056999 | 0.882452  |
| 6  | -3.056297 | -2.347891 | 1.149673  |
| 6  | -2.022327 | -0.725640 | -0.397718 |
| 6  | -3.078233 | -3.267137 | 0.123374  |
| 1  | -3.437625 | -2.597989 | 2.138720  |
| 6  | -2.051096 | -1.687136 | -1.429630 |
| 6  | -2.587107 | -2.929894 | -1.161949 |
| 1  | -3.481932 | -4.263639 | 0.293068  |
| 1  | -1.656414 | -1.448732 | -2.417730 |
| 1  | -2.630993 | -3.676436 | -1.953776 |
| 6  | -1.506493 | 0.628400  | -0.381141 |
| 6  | -1.841034 | 1.152414  | 0.950333  |
| 6  | -1.518087 | 1.565136  | -1.592513 |
| 6  | -1.853241 | 2.625063  | 1.262702  |
| 1  | -1.146284 | 0.516482  | 1.781787  |
| 6  | -1.950308 | 2.981375  | -1.207960 |
| 1  | -0.535173 | 1.619511  | -2.084360 |
| 1  | -2.204774 | 1.152464  | -2.346864 |
| 6  | -1.296762 | 3.432366  | 0.093425  |
| 1  | -1.316793 | 2.840324  | 2.195919  |
| 1  | -2.901120 | 2.916047  | 1.436038  |
| 1  | -1.706924 | 3.670329  | -2.027085 |
| 1  | -3.045403 | 3.015336  | -1.082831 |
| 1  | -1.484756 | 4.498120  | 0.275957  |
| 1  | -0.202579 | 3.310503  | 0.026119  |

## IV

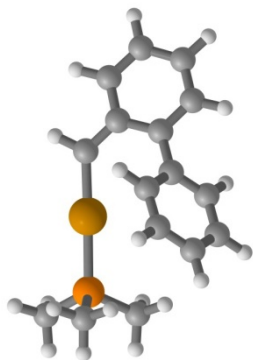

$\Delta E(\text{DCE})$ -1097.286187 h.

$\Delta G(\text{DCE})$ -1097.336036 h.

|    |           |           |           |
|----|-----------|-----------|-----------|
| 79 | -0.613679 | -0.871876 | -0.113651 |
| 15 | -2.843513 | -0.175635 | 0.307666  |
| 6  | -3.596719 | 0.770800  | -1.059086 |
| 1  | -3.595188 | 0.171102  | -1.976328 |
| 1  | -4.630800 | 1.038358  | -0.804008 |
| 1  | -3.022524 | 1.688374  | -1.238664 |
| 6  | -4.023298 | -1.530722 | 0.620746  |
| 1  | -3.703841 | -2.107721 | 1.495959  |
| 1  | -5.026713 | -1.123717 | 0.803360  |
| 1  | -4.057981 | -2.200661 | -0.245751 |
| 6  | -3.018760 | 0.923333  | 1.752112  |
| 1  | -2.423237 | 1.831291  | 1.597798  |
| 1  | -4.072229 | 1.201308  | 1.888022  |
| 1  | -2.658094 | 0.418062  | 2.655118  |
| 6  | 1.297957  | -1.551147 | -0.429281 |
| 1  | 1.406068  | -2.604022 | -0.721946 |
| 6  | 2.542351  | -0.932905 | -0.248885 |
| 6  | 3.693985  | -1.777572 | -0.200748 |
| 6  | 2.692981  | 0.460987  | 0.087538  |
| 6  | 4.904533  | -1.316446 | 0.265796  |
| 1  | 3.581024  | -2.818444 | -0.500936 |
| 6  | 3.924024  | 0.894351  | 0.570303  |
| 6  | 5.007321  | 0.021771  | 0.666504  |
| 1  | 5.767329  | -1.975326 | 0.322112  |
| 1  | 5.959723  | 0.400503  | 1.033959  |
| 6  | 1.613229  | 1.436121  | -0.107504 |
| 6  | 1.279373  | 2.338682  | 0.912584  |
| 6  | 0.931333  | 1.510729  | -1.333584 |
| 6  | 0.268094  | 3.273505  | 0.720862  |
| 6  | -0.063376 | 2.464949  | -1.529963 |
| 1  | 1.214480  | 0.845416  | -2.148605 |
| 6  | -0.403483 | 3.340190  | -0.500881 |
| 1  | 0.003157  | 3.954640  | 1.527783  |
| 1  | -0.570509 | 2.524366  | -2.491848 |
| 1  | -1.185674 | 4.082920  | -0.652359 |
| 1  | 4.055284  | 1.943564  | 0.829934  |
| 1  | 1.795804  | 2.282990  | 1.870776  |

## TSIV-V

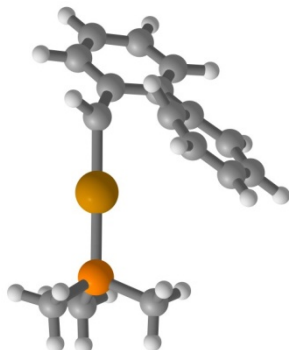

$\Delta E(\text{DCE})$ -1097.267084 h.

$\Delta G(\text{DCE})$ -1097.315563 h.

|    |           |           |           |
|----|-----------|-----------|-----------|
| 79 | -0.707493 | -0.527733 | -0.385815 |
| 15 | -2.857115 | -0.375772 | 0.553555  |

|   |           |           |           |
|---|-----------|-----------|-----------|
| 6 | -4.207724 | -0.966093 | -0.518387 |
| 1 | -4.059747 | -2.025649 | -0.755102 |
| 1 | -5.173338 | -0.841069 | -0.010682 |
| 1 | -4.216285 | -0.395794 | -1.454065 |
| 6 | -3.077234 | -1.288309 | 2.115330  |
| 1 | -2.359497 | -0.927251 | 2.860539  |
| 1 | -4.096945 | -1.142313 | 2.494794  |
| 1 | -2.902781 | -2.357361 | 1.950518  |
| 6 | -3.310407 | 1.343390  | 0.957554  |
| 1 | -3.284587 | 1.954444  | 0.047519  |
| 1 | -4.318258 | 1.381221  | 1.391734  |
| 1 | -2.592406 | 1.757384  | 1.675643  |
| 6 | 1.203786  | -0.679139 | -1.213072 |
| 1 | 1.255833  | -1.046004 | -2.248716 |
| 6 | 2.429352  | -0.830441 | -0.472910 |
| 6 | 3.216558  | -1.996315 | -0.522917 |
| 6 | 2.810257  | 0.240711  | 0.371624  |
| 6 | 4.264596  | -2.133589 | 0.370693  |
| 1 | 2.961040  | -2.800252 | -1.211901 |
| 6 | 3.878715  | 0.089775  | 1.262888  |
| 6 | 4.589956  | -1.099411 | 1.266147  |
| 1 | 4.851301  | -3.050359 | 0.375484  |
| 1 | 5.433574  | -1.221732 | 1.942551  |
| 6 | 2.032217  | 1.429315  | 0.112938  |
| 6 | 1.685048  | 2.391505  | 1.073386  |
| 6 | 1.433073  | 1.491031  | -1.177855 |
| 6 | 0.723140  | 3.341778  | 0.776217  |
| 6 | 0.440592  | 2.460700  | -1.456062 |
| 1 | 1.973434  | 1.079874  | -2.038295 |
| 6 | 0.089449  | 3.371398  | -0.482641 |
| 1 | 0.432826  | 4.065092  | 1.536154  |
| 1 | -0.002867 | 2.506213  | -2.448679 |
| 1 | -0.660499 | 4.132547  | -0.688378 |
| 1 | 2.122139  | 2.346641  | 2.069989  |
| 1 | 4.177473  | 0.914049  | 1.909357  |

## V

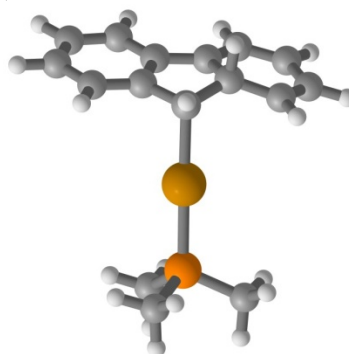

$\Delta E(\text{DCE})$ -1097.292523 h.

$\Delta G(\text{DCE})$ -1097.342815 h.

|    |           |           |           |
|----|-----------|-----------|-----------|
| 79 | -0.845315 | -0.086707 | -0.414642 |
| 15 | -2.994702 | -0.080248 | 0.540172  |
| 6  | -3.745062 | 1.576273  | 0.677670  |
| 1  | -3.840571 | 2.026072  | -0.317092 |
| 1  | -4.740292 | 1.497557  | 1.135205  |
| 1  | -3.113417 | 2.223239  | 1.296949  |
| 6  | -4.232949 | -1.051977 | -0.380900 |
| 1  | -3.924142 | -2.102176 | -0.429978 |
| 1  | -5.208617 | -0.984865 | 0.118954  |
| 1  | -4.324498 | -0.665032 | -1.401982 |
| 6  | -3.070670 | -0.746376 | 2.236254  |
| 1  | -2.420084 | -0.160583 | 2.895291  |
| 1  | -4.101723 | -0.698258 | 2.610929  |
| 1  | -2.731704 | -1.788356 | 2.244751  |
| 6  | 1.132102  | -0.062807 | -1.293506 |
| 1  | 0.972785  | -0.214189 | -2.367978 |
| 6  | 1.889086  | -1.112684 | -0.626812 |
| 6  | 1.837261  | -2.507088 | -0.805634 |
| 6  | 2.793389  | -0.573853 | 0.337328  |
| 6  | 2.617635  | -3.310465 | 0.002237  |
| 1  | 1.171207  | -2.940818 | -1.551026 |
| 6  | 3.570019  | -1.412480 | 1.167920  |

|   |          |           |           |
|---|----------|-----------|-----------|
| 6 | 3.475010 | -2.773631 | 0.995627  |
| 1 | 2.572141 | -4.391845 | -0.119743 |
| 1 | 4.066162 | -3.447803 | 1.611758  |
| 6 | 2.731414 | 0.834447  | 0.263122  |
| 6 | 3.247444 | 1.820806  | 1.120946  |
| 6 | 1.902248 | 1.210868  | -0.905224 |
| 6 | 2.809443 | 3.116067  | 0.969112  |
| 6 | 1.374656 | 2.587795  | -0.910538 |
| 1 | 2.671344 | 1.279512  | -1.719446 |
| 6 | 1.857630 | 3.500225  | -0.031367 |
| 1 | 3.172109 | 3.879215  | 1.656088  |
| 1 | 0.668617 | 2.869396  | -1.690880 |
| 1 | 1.524521 | 4.534857  | -0.068281 |
| 1 | 4.241479 | -0.988213 | 1.913297  |
| 1 | 3.913175 | 1.555095  | 1.939919  |

### TSV-VI

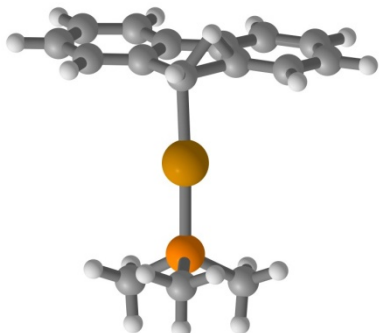

$\Delta E(\text{DCE})$  -1097.272389 h.

$\Delta G(\text{DCE})$  -1097.322036 h.

|    |           |           |           |
|----|-----------|-----------|-----------|
| 79 | -0.869189 | -0.044632 | -0.419427 |
| 15 | -2.974219 | -0.081559 | 0.556181  |
| 6  | -3.308588 | 1.334099  | 1.650361  |
| 1  | -3.255194 | 2.268373  | 1.080504  |
| 1  | -4.311140 | 1.232731  | 2.086810  |
| 1  | -2.566322 | 1.369377  | 2.455214  |
| 6  | -4.342227 | -0.081181 | -0.644444 |
| 1  | -4.265970 | -0.957244 | -1.297610 |
| 1  | -5.300904 | -0.111617 | -0.109707 |
| 1  | -4.301170 | 0.823349  | -1.260864 |
| 6  | -3.260368 | -1.553603 | 1.586979  |
| 1  | -2.510460 | -1.606157 | 2.383662  |
| 1  | -4.261901 | -1.499181 | 2.033596  |
| 1  | -3.186827 | -2.458668 | 0.973869  |
| 6  | 1.165738  | -0.100738 | -1.325741 |
| 1  | 0.793334  | -0.211703 | -2.352578 |
| 6  | 1.902053  | -1.161971 | -0.640202 |
| 6  | 1.860459  | -2.545005 | -0.856620 |
| 6  | 2.738342  | -0.616295 | 0.361811  |
| 6  | 2.628643  | -3.364242 | -0.045642 |
| 1  | 1.222213  | -2.964321 | -1.633876 |
| 6  | 3.511930  | -1.460293 | 1.173535  |
| 6  | 3.446501  | -2.826945 | 0.967060  |
| 1  | 2.599918  | -4.442837 | -0.191465 |
| 1  | 4.038582  | -3.496750 | 1.588154  |
| 6  | 2.649244  | 0.819737  | 0.328535  |
| 6  | 3.222112  | 1.798720  | 1.151522  |
| 6  | 1.770895  | 1.229036  | -0.714545 |
| 6  | 2.921012  | 3.131674  | 0.930213  |
| 6  | 1.456743  | 2.589669  | -0.929901 |
| 1  | 2.112421  | 0.682058  | -1.788316 |
| 6  | 2.045808  | 3.524227  | -0.104377 |
| 1  | 3.364832  | 3.894577  | 1.566942  |
| 1  | 0.783029  | 2.881625  | -1.733667 |
| 1  | 1.829406  | 4.580404  | -0.251404 |
| 1  | 4.156344  | -1.047083 | 1.948711  |
| 1  | 3.889232  | 1.511071  | 1.962766  |

### VI

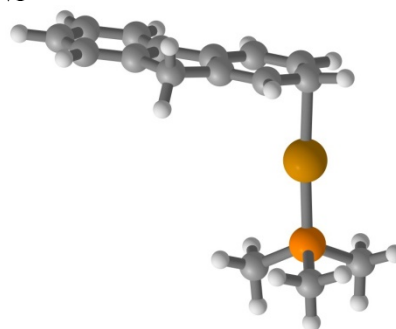

$\Delta E(\text{DCE})$  -1097.352248 h.

$\Delta G(\text{DCE})$  -1097.403101 h.

|    |           |           |           |
|----|-----------|-----------|-----------|
| 79 | -1.421874 | -0.498731 | 0.017232  |
| 15 | -3.012180 | 1.193882  | -0.030134 |
| 6  | -4.390913 | 0.854540  | -1.168112 |
| 1  | -4.913464 | -0.058539 | -0.862641 |
| 1  | -5.096423 | 1.695879  | -1.157102 |
| 1  | -4.007618 | 0.717883  | -2.185264 |
| 6  | -3.790695 | 1.511494  | 1.583658  |
| 1  | -3.029903 | 1.818756  | 2.309592  |
| 1  | -4.537934 | 2.309718  | 1.483643  |
| 1  | -4.279875 | 0.602290  | 1.949910  |
| 6  | -2.348377 | 2.803407  | -0.559743 |
| 1  | -1.921470 | 2.717494  | -1.564995 |
| 1  | -3.154849 | 3.548478  | -0.570204 |
| 1  | -1.562604 | 3.130401  | 0.130072  |
| 6  | 2.843060  | -0.220138 | 1.834134  |
| 1  | 2.326989  | 0.525949  | 2.456818  |
| 6  | 3.823249  | 0.412730  | 0.885369  |
| 6  | 4.939089  | 1.193119  | 1.159329  |
| 6  | 3.479003  | 0.112592  | -0.444877 |
| 6  | 5.704884  | 1.668154  | 0.093716  |
| 1  | 5.214227  | 1.431491  | 2.186523  |
| 6  | 4.244764  | 0.586238  | -1.510192 |
| 6  | 5.361704  | 1.367560  | -1.229080 |
| 1  | 6.582483  | 2.280798  | 0.294421  |
| 1  | 5.975140  | 1.747751  | -2.044184 |
| 6  | 2.279899  | -0.717634 | -0.434959 |
| 6  | 1.551283  | -1.265143 | -1.490987 |
| 6  | 1.893553  | -0.926640 | 0.906980  |
| 6  | 0.435945  | -2.047486 | -1.201599 |
| 6  | 0.786496  | -1.702763 | 1.203737  |
| 1  | 3.330303  | -0.916385 | 2.532914  |
| 6  | 0.035229  | -2.270886 | 0.140952  |
| 1  | -0.121316 | -2.523886 | -2.006163 |
| 1  | 0.498983  | -1.904320 | 2.235106  |
| 1  | -0.711775 | -3.036791 | 0.358228  |
| 1  | 3.980130  | 0.350882  | -2.540857 |
| 1  | 1.850699  | -1.101166 | -2.525054 |

VIIa

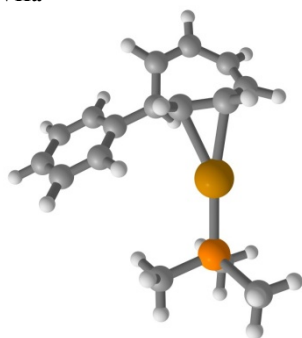

$\Delta E(\text{DCE}) -1098.649400 \text{ h.}$

$\Delta G(\text{DCE}) -1098.700023 \text{ h.}$

|    |           |           |           |
|----|-----------|-----------|-----------|
| 6  | -0.882143 | -3.130294 | 0.344309  |
| 6  | -2.120429 | -3.311348 | 0.867067  |
| 6  | -3.319897 | -2.628883 | 0.453721  |
| 6  | -0.607558 | -2.241778 | -0.765711 |
| 6  | -3.374117 | -1.357279 | 0.021594  |
| 6  | -1.250638 | -1.040988 | -0.965573 |
| 6  | -2.161616 | -0.474046 | 0.085601  |
| 1  | -0.092079 | -3.816296 | 0.637731  |
| 1  | -4.241034 | -3.206339 | 0.490699  |
| 1  | -2.246354 | -4.140449 | 1.560213  |
| 1  | -0.032208 | -2.664915 | -1.590583 |
| 1  | -4.299694 | -0.947397 | -0.376116 |
| 1  | -1.247793 | -0.595998 | -1.959903 |
| 1  | -1.689136 | -0.664959 | 1.064502  |
| 6  | -2.441555 | 1.005703  | -0.013567 |
| 6  | -3.522062 | 1.539795  | 0.688792  |
| 6  | -1.619332 | 1.875784  | -0.725480 |
| 6  | -3.781282 | 2.902034  | 0.670750  |
| 1  | -4.165717 | 0.879188  | 1.265021  |
| 6  | -1.875621 | 3.241930  | -0.744397 |
| 1  | -0.758306 | 1.496515  | -1.271448 |
| 6  | -2.958787 | 3.759599  | -0.049706 |
| 1  | -4.628098 | 3.296285  | 1.224061  |
| 1  | -1.222518 | 3.902084  | -1.307549 |
| 1  | -3.160894 | 4.825954  | -0.066073 |
| 79 | 0.967413  | -0.583590 | -0.241798 |
| 15 | 2.752232  | 0.805028  | 0.359700  |
| 6  | 3.067188  | 0.893710  | 2.143804  |
| 1  | 3.870103  | 1.613172  | 2.334891  |
| 1  | 2.161631  | 1.213798  | 2.663788  |
| 1  | 3.363484  | -0.088688 | 2.517780  |
| 6  | 2.430334  | 2.517489  | -0.148969 |
| 1  | 1.514799  | 2.872784  | 0.331234  |
| 1  | 3.269625  | 3.155555  | 0.145866  |
| 1  | 2.300981  | 2.562815  | -1.233075 |
| 6  | 4.347488  | 0.366196  | -0.383181 |
| 1  | 4.266428  | 0.379299  | -1.472074 |
| 1  | 5.108801  | 1.086038  | -0.065238 |
| 1  | 4.639059  | -0.636002 | -0.061490 |

VIIb

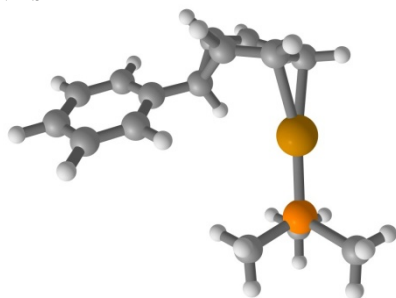

$\Delta E(\text{DCE}) -1098.649650 \text{ h.}$

$\Delta G(\text{DCE}) -1098.701019 \text{ h.}$

|   |           |           |           |
|---|-----------|-----------|-----------|
| 6 | -1.645722 | -1.466932 | -0.963225 |
| 6 | -1.988857 | -0.650866 | 0.245244  |
| 6 | -2.324624 | -2.102434 | 0.295304  |

|    |           |           |           |
|----|-----------|-----------|-----------|
| 6  | -0.284765 | -1.910776 | -1.254941 |
| 6  | -1.482944 | -2.993242 | 1.089036  |
| 6  | 0.449103  | -2.636740 | -0.341970 |
| 6  | -0.164883 | -3.146050 | 0.870734  |
| 1  | -2.288526 | -1.297198 | -1.822243 |
| 1  | -1.131895 | -0.363796 | 0.859652  |
| 1  | -3.376149 | -2.361226 | 0.201331  |
| 1  | 0.055697  | -1.860955 | -2.286129 |
| 1  | -1.966185 | -3.564754 | 1.876769  |
| 1  | 1.388589  | -3.083831 | -0.661332 |
| 1  | 0.427365  | -3.789096 | 1.512422  |
| 6  | -3.036378 | 0.397285  | 0.113828  |
| 6  | -4.263769 | 0.300691  | 0.760698  |
| 6  | -2.760505 | 1.528198  | -0.654829 |
| 6  | -5.204049 | 1.317389  | 0.638759  |
| 1  | -4.484588 | -0.573699 | 1.367096  |
| 6  | -3.694884 | 2.545650  | -0.773759 |
| 1  | -1.801893 | 1.597530  | -1.167594 |
| 6  | -4.921307 | 2.440091  | -0.126449 |
| 1  | -6.160500 | 1.231566  | 1.145425  |
| 1  | -3.471043 | 3.420515  | -1.376521 |
| 1  | -5.656886 | 3.232763  | -0.222243 |
| 79 | 1.305945  | -0.450195 | -0.219239 |
| 15 | 2.459767  | 1.513863  | 0.325481  |
| 6  | 1.509999  | 3.010680  | -0.062743 |
| 1  | 0.574218  | 3.009307  | 0.501045  |
| 1  | 2.094709  | 3.896737  | 0.205241  |
| 1  | 1.279357  | 3.035733  | -1.130263 |
| 6  | 2.864544  | 1.656376  | 2.088158  |
| 1  | 3.507542  | 0.826084  | 2.387853  |
| 1  | 3.383260  | 2.603592  | 2.269224  |
| 1  | 1.947215  | 1.626027  | 2.680424  |
| 6  | 4.038474  | 1.712749  | -0.545940 |
| 1  | 4.505459  | 2.656602  | -0.246446 |
| 1  | 4.704934  | 0.883473  | -0.298993 |
| 1  | 3.866569  | 1.719634  | -1.624459 |

VIIc

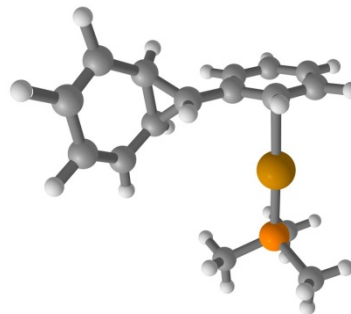

$\Delta E(\text{DCE}) -1098.646245 \text{ h.}$

$\Delta G(\text{DCE}) -1098.697565 \text{ h.}$

|    |           |           |           |
|----|-----------|-----------|-----------|
| 6  | 2.614644  | -0.828042 | 0.912821  |
| 6  | 2.409382  | 0.158269  | -0.217727 |
| 6  | 3.766454  | 0.065973  | 0.437622  |
| 6  | 2.711703  | -2.252573 | 0.603466  |
| 6  | 4.852021  | -0.601157 | -0.280100 |
| 6  | 3.674601  | -2.731232 | -0.203921 |
| 6  | 4.763454  | -1.889959 | -0.652617 |
| 1  | 2.111635  | -0.553132 | 1.837802  |
| 1  | 4.032460  | 0.920007  | 1.055906  |
| 1  | 1.993532  | -2.922680 | 1.067590  |
| 1  | 5.750564  | -0.026750 | -0.485904 |
| 1  | 3.705857  | -3.790107 | -0.442314 |
| 1  | 5.574849  | -2.347641 | -1.210545 |
| 79 | -0.988874 | 0.288746  | -0.335353 |
| 15 | -2.597454 | -1.283251 | 0.257982  |
| 6  | -1.885669 | -2.861870 | 0.798390  |
| 1  | -1.257693 | -2.703635 | 1.677931  |
| 1  | -2.691119 | -3.560360 | 1.047425  |
| 1  | -1.275120 | -3.282534 | -0.003574 |
| 6  | -3.679888 | -0.758127 | 1.615658  |
| 1  | -4.215458 | 0.150222  | 1.331119  |
| 1  | -4.401239 | -1.552132 | 1.835726  |



|   |           |           |           |
|---|-----------|-----------|-----------|
| 1 | -3.082806 | -0.553124 | 2.506933  |
| 6 | -3.712827 | -1.708211 | -1.108187 |
| 1 | -3.134978 | -2.105544 | -1.945605 |
| 1 | -4.434233 | -2.461225 | -0.774584 |
| 1 | -4.246504 | -0.814691 | -1.439509 |
| 1 | 2.340150  | -0.288888 | -1.207598 |
| 6 | 1.544829  | 1.323106  | -0.001321 |
| 6 | 1.543631  | 2.067733  | 1.182870  |
| 6 | 0.662921  | 1.723481  | -1.039722 |
| 6 | 0.725794  | 3.177365  | 1.324125  |
| 1 | 2.202785  | 1.791707  | 2.000856  |
| 6 | -0.164105 | 2.855503  | -0.875401 |
| 1 | 0.783701  | 1.286249  | -2.030897 |
| 6 | -0.137491 | 3.575440  | 0.307182  |
| 1 | 0.760371  | 3.744671  | 2.248994  |
| 1 | -0.798904 | 3.167615  | -1.698440 |
| 1 | -0.771685 | 4.445584  | 0.433051  |

### VIIIa

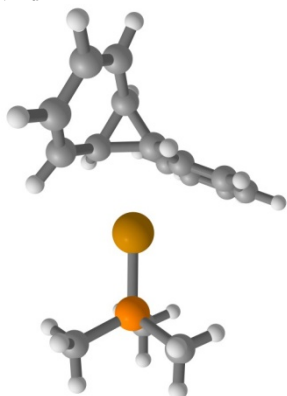

$\Delta E(\text{DCE})$  -1098.628265

$\Delta G(\text{DCE})$  -1098.680711

|    |           |           |           |
|----|-----------|-----------|-----------|
| 6  | -1.938635 | -0.904351 | -0.859673 |
| 6  | -1.946268 | 0.138232  | 0.333863  |
| 6  | -3.227050 | -0.294196 | -0.335822 |
| 6  | -1.740733 | -2.337649 | -0.603281 |
| 6  | -4.143961 | -1.187265 | 0.378232  |
| 6  | -2.574728 | -3.031451 | 0.187452  |
| 6  | -3.797998 | -2.444039 | 0.694043  |
| 1  | -1.573947 | -0.512386 | -1.807786 |
| 1  | -3.671637 | 0.493343  | -0.940015 |
| 1  | -0.913960 | -2.829129 | -1.108496 |
| 1  | -5.125514 | -0.797036 | 0.628664  |
| 1  | -2.391062 | -4.085845 | 0.368764  |
| 1  | -4.485650 | -3.074208 | 1.249002  |
| 79 | 0.520685  | -0.334623 | -0.052870 |
| 15 | 2.811811  | -0.512540 | 0.045429  |
| 6  | 3.450866  | -0.399811 | 1.737159  |
| 1  | 3.039547  | -1.209089 | 2.343915  |
| 1  | 4.542888  | -0.477537 | 1.717161  |
| 1  | 3.162009  | 0.557523  | 2.176224  |
| 6  | 3.462186  | -2.066009 | -0.620956 |
| 1  | 3.177369  | -2.166405 | -1.670238 |
| 1  | 4.554029  | -2.064891 | -0.537576 |
| 1  | 3.055522  | -2.908998 | -0.058467 |
| 6  | 3.643931  | 0.805089  | -0.878739 |
| 1  | 3.346925  | 1.777894  | -0.480017 |
| 1  | 4.728288  | 0.686390  | -0.784006 |
| 1  | 3.362585  | 0.751767  | -1.932515 |
| 1  | -1.818270 | -0.289310 | 1.328487  |
| 6  | -1.497043 | 1.548275  | 0.171923  |
| 6  | -1.575206 | 2.228653  | -1.046131 |
| 6  | -0.996944 | 2.224352  | 1.289595  |
| 6  | -1.155853 | 3.547529  | -1.140942 |
| 1  | -1.962116 | 1.731281  | -1.932332 |
| 6  | -0.581216 | 3.543168  | 1.190186  |
| 1  | -0.937782 | 1.704200  | 2.242574  |
| 6  | -0.656205 | 4.209329  | -0.026399 |
| 1  | -1.221545 | 4.061815  | -2.094645 |
| 1  | -0.199039 | 4.053260  | 2.068925  |

|   |           |          |           |
|---|-----------|----------|-----------|
| 1 | -0.330776 | 5.241558 | -0.105384 |
|---|-----------|----------|-----------|

### TSVIIId-VIII

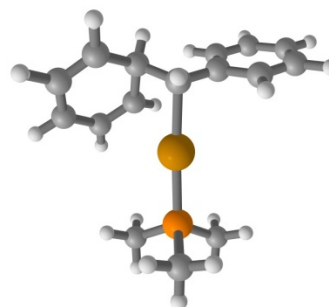

$\Delta E(\text{DCE})$  -1098.614032 h.

$\Delta G(\text{DCE})$  -1098.663856 h.

|    |           |           |           |
|----|-----------|-----------|-----------|
| 6  | -0.562379 | 1.779958  | 1.044426  |
| 6  | -1.474361 | 0.729359  | -0.662582 |
| 6  | -1.527610 | 2.124006  | -0.021852 |
| 6  | 0.625098  | 2.522765  | 1.253690  |
| 6  | -1.042786 | 3.188341  | -0.935458 |
| 6  | 0.927332  | 3.552655  | 0.415306  |
| 6  | 0.103891  | 3.856028  | -0.721356 |
| 1  | -0.904839 | 1.097700  | 1.817989  |
| 1  | -2.535071 | 2.370618  | 0.349452  |
| 1  | 1.272010  | 2.262741  | 2.084561  |
| 1  | -1.671410 | 3.427290  | -1.788999 |
| 1  | 1.818486  | 4.146729  | 0.591642  |
| 1  | 0.416092  | 4.642872  | -1.399464 |
| 79 | 0.463466  | -0.159393 | -0.179785 |
| 15 | 2.573372  | -1.228353 | 0.119932  |
| 6  | 3.487236  | -1.516888 | -1.425085 |
| 1  | 3.639059  | -0.567143 | -1.943675 |
| 1  | 4.459756  | -1.969902 | -1.206170 |
| 1  | 2.915081  | -2.183994 | -2.073789 |
| 6  | 3.708308  | -0.236678 | 1.137967  |
| 1  | 3.273406  | -0.088424 | 2.129634  |
| 1  | 4.674513  | -0.742386 | 1.235660  |
| 1  | 3.855024  | 0.740966  | 0.671297  |
| 6  | 2.525081  | -2.852380 | 0.934327  |
| 1  | 1.930784  | -3.547112 | 0.336483  |
| 1  | 3.540587  | -3.246787 | 1.043928  |
| 1  | 2.065100  | -2.756227 | 1.920555  |
| 1  | -1.321789 | 0.781511  | -1.742949 |
| 6  | -2.480935 | -0.261982 | -0.242652 |
| 6  | -3.292700 | -0.108076 | 0.886106  |
| 6  | -2.659370 | -1.412060 | -1.029813 |
| 6  | -4.246765 | -1.064588 | 1.211682  |
| 1  | -3.191750 | 0.763416  | 1.526304  |
| 6  | -3.616088 | -2.356520 | -0.708876 |
| 1  | -2.035058 | -1.547456 | -1.910100 |
| 6  | -4.414860 | -2.190468 | 0.419705  |
| 1  | -4.865570 | -0.922331 | 2.092411  |
| 1  | -3.741523 | -3.230824 | -1.340332 |
| 1  | -5.161803 | -2.934737 | 0.676346  |

### VIII

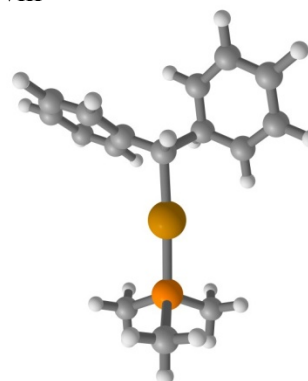

$\Delta E(\text{DCE}) -1098.617404 \text{ h.}$   
 $\Delta G(\text{DCE}) -1098.670156 \text{ h.}$

|    |           |           |           |
|----|-----------|-----------|-----------|
| 6  | 1.257630  | -2.522042 | -0.667477 |
| 6  | 1.313471  | -0.178467 | 0.282273  |
| 6  | 1.949569  | -1.256385 | -0.822828 |
| 6  | 1.845964  | -3.585179 | -0.053422 |
| 6  | 3.347070  | -1.253316 | -0.455233 |
| 6  | 3.176826  | -3.473715 | 0.389538  |
| 6  | 3.929474  | -2.320537 | 0.184716  |
| 1  | 0.227442  | -2.578627 | -1.009052 |
| 1  | 1.733353  | -0.766605 | -1.777182 |
| 1  | 1.305367  | -4.512265 | 0.096253  |
| 1  | 3.912043  | -0.340990 | -0.625410 |
| 1  | 3.630440  | -4.315713 | 0.904715  |
| 1  | 4.956564  | -2.270866 | 0.525704  |
| 79 | -0.816238 | -0.088194 | 0.110964  |
| 15 | -3.170522 | 0.099951  | 0.002262  |
| 6  | -4.019373 | -0.172732 | 1.588122  |
| 1  | -3.800298 | -1.177249 | 1.957573  |
| 1  | -5.100895 | -0.061493 | 1.458110  |
| 1  | -3.666827 | 0.555023  | 2.322827  |
| 6  | -3.970940 | -1.071147 | -1.137159 |
| 1  | -3.590071 | -0.919045 | -2.149877 |
| 1  | -5.055058 | -0.917209 | -1.131387 |
| 1  | -3.749227 | -2.095805 | -0.829075 |
| 6  | -3.769986 | 1.728631  | -0.543258 |
| 1  | -3.423659 | 2.498217  | 0.150579  |
| 1  | -4.864634 | 1.733068  | -0.574258 |
| 1  | -3.377789 | 1.952815  | -1.537987 |
| 1  | 1.579071  | -0.588302 | 1.264553  |
| 6  | 1.909325  | 1.177055  | 0.115975  |
| 6  | 1.789448  | 1.895614  | -1.078373 |
| 6  | 2.577039  | 1.783998  | 1.182960  |
| 6  | 2.315658  | 3.171486  | -1.200113 |
| 1  | 1.261645  | 1.451730  | -1.920719 |
| 6  | 3.085399  | 3.071085  | 1.070509  |
| 1  | 2.693932  | 1.235933  | 2.115492  |
| 6  | 2.962888  | 3.768926  | -0.123431 |
| 1  | 2.211963  | 3.709099  | -2.137905 |
| 1  | 3.591061  | 3.525747  | 1.917278  |
| 1  | 3.369456  | 4.770969  | -0.217148 |

**TSVIII-IX**

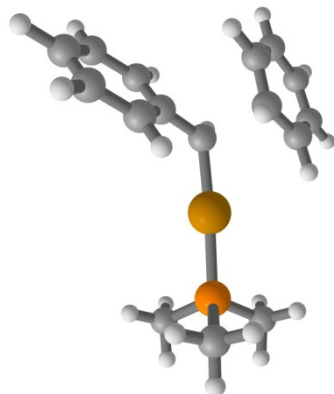

$\Delta E(\text{DCE}) -1098.615621 \text{ h.}$   
 $\Delta G(\text{DCE}) -1098.667797 \text{ h.}$

|    |           |          |           |
|----|-----------|----------|-----------|
| 6  | -1.030388 | 2.551103 | 0.725317  |
| 6  | -1.245400 | 0.120634 | -0.353510 |
| 6  | -1.540372 | 3.573487 | -0.035589 |
| 6  | -1.829144 | 1.418442 | 1.043407  |
| 6  | -2.879722 | 3.533610 | -0.437644 |
| 6  | -3.202651 | 1.454538 | 0.699579  |
| 6  | -3.713592 | 2.485208 | -0.062168 |
| 1  | 0.005354  | 2.570130 | 1.051965  |
| 1  | -0.917254 | 4.415833 | -0.314164 |
| 1  | -1.511126 | 0.781149 | 1.864708  |
| 1  | -3.276175 | 4.339335 | -1.047905 |
| 1  | -3.838120 | 0.624628 | 0.993417  |
| 1  | -4.754606 | 2.480180 | -0.364397 |
| 79 | 0.845572  | 0.008889 | -0.127688 |

|    |           |           |           |
|----|-----------|-----------|-----------|
| 15 | 3.197988  | -0.207041 | -0.007812 |
| 6  | 4.119997  | 1.357419  | -0.115969 |
| 1  | 3.890755  | 1.855656  | -1.060905 |
| 1  | 5.195794  | 1.160777  | -0.061399 |
| 1  | 3.830812  | 2.014933  | 0.707387  |
| 6  | 3.902916  | -1.237099 | -1.330039 |
| 1  | 3.469645  | -2.239041 | -1.283650 |
| 1  | 4.989110  | -1.305723 | -1.211330 |
| 1  | 3.670660  | -0.799895 | -2.303889 |
| 6  | 3.805688  | -0.978892 | 1.522903  |
| 1  | 3.506616  | -0.379211 | 2.385664  |
| 1  | 4.897673  | -1.053879 | 1.494044  |
| 1  | 3.376997  | -1.978754 | 1.624472  |
| 1  | -1.597293 | 0.701456  | -1.211857 |
| 6  | -2.035183 | -1.097980 | -0.157039 |
| 6  | -1.711950 | -2.021065 | 0.846596  |
| 6  | -3.095355 | -1.396764 | -1.023620 |
| 6  | -2.421460 | -3.201961 | 0.977618  |
| 1  | -0.886552 | -1.799692 | 1.519952  |
| 6  | -3.785248 | -2.592779 | -0.913690 |
| 1  | -3.367387 | -0.678368 | -1.793815 |
| 6  | -3.454606 | -3.493518 | 0.092508  |
| 1  | -2.162944 | -3.906398 | 1.761649  |
| 1  | -4.590283 | -2.820464 | -1.605019 |
| 1  | -4.002908 | -4.425524 | 0.187630  |

**IX**

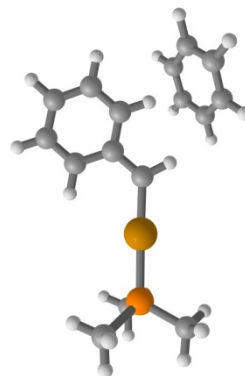

$\Delta E(\text{DCE}) -1098.628727 \text{ h.}$   
 $\Delta G(\text{DCE}) -1098.685404 \text{ h.}$

|    |           |           |           |
|----|-----------|-----------|-----------|
| 6  | -3.823964 | -2.488359 | -0.662833 |
| 6  | -0.615892 | 0.080403  | -0.254063 |
| 6  | -4.890560 | -1.802540 | -1.233502 |
| 6  | -3.586650 | -2.392177 | 0.703788  |
| 6  | -5.719792 | -1.021396 | -0.436764 |
| 6  | -4.414652 | -1.609501 | 1.499660  |
| 6  | -5.481746 | -0.925191 | 0.929364  |
| 1  | -3.178775 | -3.102374 | -1.284484 |
| 1  | -5.076824 | -1.879350 | -2.300478 |
| 1  | -2.755616 | -2.930785 | 1.149958  |
| 1  | -6.554574 | -0.487935 | -0.881769 |
| 1  | -4.230694 | -1.535516 | 2.567250  |
| 1  | -6.130035 | -0.315326 | 1.551554  |
| 79 | 1.413909  | -0.116273 | -0.080157 |
| 15 | 3.776279  | -0.388995 | 0.076988  |
| 6  | 4.433289  | -0.294453 | 1.770180  |
| 1  | 3.981022  | -1.074544 | 2.386721  |
| 1  | 5.519674  | -0.429649 | 1.752389  |
| 1  | 4.196495  | 0.679227  | 2.205116  |
| 6  | 4.390604  | -1.979980 | -0.552657 |
| 1  | 4.127556  | -2.085889 | -1.607574 |
| 1  | 5.478823  | -2.028671 | -0.442763 |
| 1  | 3.934172  | -2.799681 | 0.007026  |
| 6  | 4.728787  | 0.858679  | -0.841318 |
| 1  | 4.489478  | 1.855376  | -1.463282 |
| 1  | 5.800895  | 0.673143  | -0.719316 |
| 1  | 4.472015  | 0.814347  | -1.902188 |
| 1  | -1.213929 | -0.812514 | -0.474197 |
| 6  | -1.398283 | 1.234248  | -0.149324 |
| 6  | -0.809282 | 2.495635  | 0.135701  |
| 6  | -2.805921 | 1.162382  | -0.331633 |

|   |           |          |           |   |          |           |           |
|---|-----------|----------|-----------|---|----------|-----------|-----------|
| 6 | -1.590131 | 3.621801 | 0.230165  | 1 | 3.916351 | -2.110788 | -0.016271 |
| 1 | 0.267371  | 2.542696 | 0.273937  | 6 | 5.041690 | 1.080482  | -0.002341 |
| 6 | -3.581608 | 2.294042 | -0.233139 | 1 | 3.825806 | 2.857866  | 0.012337  |
| 1 | -3.257124 | 0.199047 | -0.556747 | 1 | 6.042073 | -0.825758 | -0.017771 |
| 6 | -2.971997 | 3.517123 | 0.046242  | 1 | 5.971894 | 1.640517  | -0.002558 |
| 1 | -1.145245 | 4.586614 | 0.445228  |   |          |           |           |
| 1 | -4.656063 | 2.237746 | -0.370007 |   |          |           |           |
| 1 | -3.584842 | 4.410235 | 0.122024  |   |          |           |           |

**benzene**

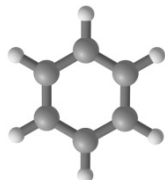

$\Delta E(\text{DCE})$  -232.015548 h.

$\Delta G(\text{DCE})$  -232.043028 h.

|   |           |           |           |
|---|-----------|-----------|-----------|
| 6 | -0.157356 | 1.380635  | 0.000001  |
| 6 | -1.274652 | 0.554000  | -0.000027 |
| 6 | -1.117048 | -0.826638 | 0.000020  |
| 6 | 0.157379  | -1.380632 | -0.000004 |
| 6 | 1.274642  | -0.554021 | -0.000016 |
| 6 | 1.117035  | 0.826656  | 0.000021  |
| 1 | -0.280103 | 2.459598  | 0.000001  |
| 1 | -2.270453 | 0.987251  | -0.000014 |
| 1 | -1.990159 | -1.472538 | 0.000016  |
| 1 | 0.280058  | -2.459603 | 0.000007  |
| 1 | 2.270470  | -0.987210 | -0.000012 |
| 1 | 1.990186  | 1.472501  | 0.000031  |

**IX (no benzene)**

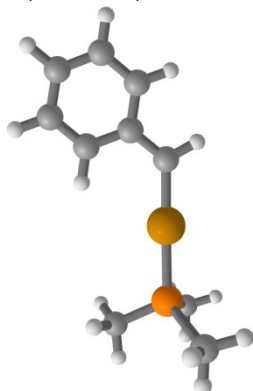

$\Delta E(\text{DCE})$  -866.608514 h.

$\Delta G(\text{DCE})$  -866.653884 h.

|    |           |           |           |
|----|-----------|-----------|-----------|
| 79 | -0.461167 | -0.390117 | 0.004322  |
| 15 | -2.717346 | 0.380402  | -0.003593 |
| 6  | -3.734674 | -0.304607 | -1.346110 |
| 1  | -3.777578 | -1.392562 | -1.257823 |
| 1  | -4.748509 | 0.104906  | -1.287895 |
| 1  | -3.294604 | -0.047398 | -2.312403 |
| 6  | -3.648696 | -0.013377 | 1.508060  |
| 1  | -3.166201 | 0.449778  | 2.371898  |
| 1  | -4.673836 | 0.361480  | 1.420238  |
| 1  | -3.671013 | -1.095513 | 1.655824  |
| 6  | -2.888680 | 2.181148  | -0.184330 |
| 1  | -2.441412 | 2.500520  | -1.128617 |
| 1  | -3.947324 | 2.459777  | -0.172826 |
| 1  | -2.372947 | 2.685265  | 0.636319  |
| 6  | 1.465138  | -1.079421 | 0.000949  |
| 1  | 1.633843  | -2.162727 | -0.002890 |
| 6  | 2.658711  | -0.350604 | -0.001019 |
| 6  | 2.649084  | 1.069713  | 0.006327  |
| 6  | 3.909604  | -1.025139 | -0.009798 |
| 6  | 3.829091  | 1.774099  | 0.006095  |
| 1  | 1.689377  | 1.579194  | 0.012568  |
| 6  | 5.086477  | -0.314188 | -0.010779 |
